# Supplementary material for: Analysis of the solvent effects on the crystal growth of peripherally chlorinated boron subphthalocyanines
Source: Royal Society of Chemistry journal article supplement (doi:10.1039/d1ce01320c), 2022-01-01
Supplement: d1ce01320c1.pdf [file d1ce01320c1.pdf]

# Analysis of the Solvent Effects on the Crystal Growth of Peripherally Chlorinated Boron Subphthalocyanines

*Kacper Wojtkiewicz<sup>a</sup>, Alan Lough<sup>b</sup> and Timothy P. Bender<sup>a,b,c,\*</sup>*

<sup>a</sup> Department of Chemical Engineering and Applied Chemistry, University of Toronto, 200 College Street, Toronto, Ontario, Canada M5S 3E4.

<sup>b</sup> Department of Chemistry, University of Toronto, 80 St George Street, Toronto, Ontario, Canada M5S 3H6.

<sup>c</sup> Department of Materials Science and Engineering, University of Toronto, 184 College Street, Toronto, Ontario, Canada, M5S 3E4.

\* - corresponding author: [tim.bender@utoronto.ca](mailto:tim.bender@utoronto.ca)

## Supporting Information

## List of Figures

|                                                                                                                                                            |     |
|------------------------------------------------------------------------------------------------------------------------------------------------------------|-----|
| <b>Figure S1:</b> $^1\text{H}$ NMR spectrum of NaphO-Cl <sub>6</sub> BsubPc.....                                                                           | 13  |
| <b>Figure S2:</b> EI+ Mass Spectrum of NaphO-Cl <sub>6</sub> BsubPc.....                                                                                   | 14  |
| <b>Figure S3:</b> $^1\text{H}$ NMR Spectrum of <i>m</i> IPhO-Cl <sub>6</sub> BsubPc.....                                                                   | 16  |
| <b>Figure S4:</b> DART Mass Spectrum of NaphO-Cl <sub>6</sub> BsubPc.....                                                                                  | 17  |
| <b>Figure S5:</b> Anisotropic displacement ellipsoid plots of Cl-Cl <sub>6</sub> BsubPc (Toluene:Heptane; CCDC deposit 2087092). .....                     | 18  |
| <b>Figure S6:</b> Populated unit cell of Cl-Cl <sub>6</sub> BsubPc (Toluene:Heptane; CCDC deposit 2087092). .                                              | 18  |
| <b>Figure S7:</b> Anisotropic displacement ellipsoid of Cl-Cl <sub>6</sub> BsubPc (Chlorobenzene:Heptane; CCDC deposit 2087100).....                       | 34  |
| <b>Figure S8:</b> Populated unit cell of Cl-Cl <sub>6</sub> BsubPc (Chlorobenzene:Heptane; CCDC deposit 2087100).....                                      | 34  |
| <b>Figure S9:</b> Anisotropic displacement ellipsoid plot of Cl-Cl <sub>6</sub> BsubPc (Dichlorobenzene:Heptane; CCDC deposit 2087096).....                | 50  |
| <b>Figure S10:</b> Populated unit cell of Cl-Cl <sub>6</sub> BsubPc (DiChlorobenzene:Heptane; CCDC deposit 2087096).....                                   | 50  |
| <b>Figure S11:</b> Anisotropic displacement ellipsoid of Cl-Cl <sub>6</sub> BsubPc (Dichlorobenzene:Dimethoxybenzene:Heptane; CCDC deposit 2087097). ..... | 66  |
| <b>Figure S12:</b> Populated unit cell of Cl-Cl <sub>6</sub> BsubPc (Dichlorobenzene:Dimethoxybenzene:Heptane; CCDC deposit 2087097). .....                | 66  |
| <b>Figure S13:</b> Anisotropic displacement ellipsoid plot of PhO-Cl <sub>6</sub> BsubPc (Toluene:Heptane; CCDC deposit 2087093).....                      | 82  |
| <b>Figure S14:</b> Populated unit Cell of PhO-Cl <sub>6</sub> BsubPc (Toluene:Heptane; CCDC deposit 2087093). .....                                        | 83  |
| <b>Figure S15:</b> Powder x-ray diffraction of PhO-Cl <sub>6</sub> BsubPc (Toluene:Heptane; CCDC deposit 2087093).....                                     | 82  |
| <b>Figure S16:</b> Anisotropic displacement ellipsoid plot of PhO-Cl <sub>6</sub> BsubPc (Chlorobenzene:Heptane; CCDC deposit 2087094). .....              | 99  |
| <b>Figure S17:</b> Populated unit cell of PhO-Cl <sub>6</sub> BsubPc (Chlorobenzene:Heptane; CCDC deposit 2087094).....                                    | 99  |
| <b>Figure S18:</b> Powder x-ray diffraction PhO-Cl <sub>6</sub> BsubPc (Chlorobenzene:Heptane; CCDC deposit 2087094).....                                  | 100 |

|                                                                                                                                                              |     |
|--------------------------------------------------------------------------------------------------------------------------------------------------------------|-----|
| <b>Figure S19:</b> Anisotropic displacement ellipsoid plot of PhO-Cl <sub>6</sub> BsubPc (Dichlorobenzene:Pentane; CCDC deposit 2087095).                    | 121 |
| <b>Figure S20:</b> Populated unit cell of PhO-Cl <sub>6</sub> BsubPc (Dichlorobenzene:Pentane; CCDC deposit 2087095).                                        | 122 |
| <b>Figure S21:</b> Powder x-ray diffraction PhO-Cl <sub>6</sub> BsubPc (Dichlorobenzene:Pentane; CCDC deposit 2087095).                                      | 123 |
| <b>Figure S22:</b> Anisotropic displacement ellipsoid plot of PhO-Cl <sub>6</sub> BsubPc (Dichlorobenzene:Dimethoxybenzene:Pentane; CCDC deposit 2087098).   | 139 |
| <b>Figure S23:</b> Populated unit cell of PhO-Cl <sub>6</sub> BsubPc (Dichlorobenzene:Dimethoxybenzene:Pentane; CCDC deposit 2087098).                       | 139 |
| <b>Figure S24:</b> Powder x-ray diffraction PhO-Cl <sub>6</sub> BsubPc (Dichlorobenzene:Dimethoxybenzene:Pentane; CCDC deposit 2087098).                     | 140 |
| <b>Figure S25:</b> Anisotropic displacement plot of NaphO-Cl <sub>6</sub> BsubPc (Toluene:Heptane; CCDC deposit 2087099).                                    | 156 |
| <b>Figure S26:</b> Populated unit cell of NaphO-Cl <sub>6</sub> BsubPc (Toluene:Heptane; CCDC deposit 2087099).                                              | 156 |
| <b>Figure S27:</b> Powder x-ray diffraction NaphO-Cl <sub>6</sub> BsubPc (Toluene:Heptane; CCDC deposit 2087099).                                            | 157 |
| <b>Figure S28:</b> Anisotropic displacement ellipsoid plot of NaphO-Cl <sub>6</sub> BsubPc (Chlorobenzene:Heptane; CCDC deposit 2087101).                    | 175 |
| <b>Figure S29:</b> Populated unit cell of NaphO-Cl <sub>6</sub> BsubPc (Chlorobenzene:Heptane; CCDC deposit 2087101).                                        | 175 |
| <b>Figure S30:</b> Powder x-ray diffraction NaphO-Cl <sub>6</sub> BsubPc (Chlorobenzene:Heptane; CCDC deposit 2087101).                                      | 176 |
| <b>Figure S31:</b> Anisotropic displacement ellipsoid plot of NaphO-Cl <sub>6</sub> BsubPc (Dichlorobenzene:Heptane; CCDC deposit 2087104).                  | 194 |
| <b>Figure S32:</b> Populated unit cell of NaphO-Cl <sub>6</sub> BsubPc (Dichlorobenzene:Heptane; CCDC deposit 2087104).                                      | 194 |
| <b>Figure S33:</b> Powder x-ray diffraction NaphO-Cl <sub>6</sub> BsubPc (Dichlorobenzene:Heptane; CCDC deposit 2087104).                                    | 195 |
| <b>Figure S34:</b> Anisotropic displacement ellipsoid plot of NaphO-Cl <sub>6</sub> BsubPc (Dichlorobenzene:Dimethoxybenzene:Heptane; CCDC deposit 2087102). | 213 |
| <b>Figure S35:</b> Populated unit cell of NaphO-Cl <sub>6</sub> BsubPc (Dichlorobenzene:Dimethoxybenzene:Heptane; CCDC deposit 2087102).                     | 213 |

|                                                                                                                                                                                                        |     |
|--------------------------------------------------------------------------------------------------------------------------------------------------------------------------------------------------------|-----|
| <b>Figure S36:</b> Powder x-ray diffraction of NaphO-Cl <sub>6</sub> BsubPc (Dichlorobenzene:Dimethoxybenzene:Heptane; CCDC deposit 2087102). .....                                                    | 214 |
| <b>Figure S37:</b> Anisotropic displacement ellipsoid plots of individual co-crystals of <i>m</i> -IPhO-Cl <sub>6</sub> BsubPc (Toluene:Heptane; CCDC deposit 2087103). .....                          | 232 |
| <b>Figure S38:</b> Populated unit cell of <i>m</i> -IPhO-Cl <sub>6</sub> BsubPc (Toluene:Heptane; CCDC deposit 2087103). .....                                                                         | 233 |
| <b>Figure S39:</b> Powder x-ray diffraction of <i>m</i> IPhO-Cl <sub>6</sub> BsubPc (Toluene:Heptane; CCDC deposit 2087103). .....                                                                     | 233 |
| <b>Figure S40:</b> Anisotropic displacement ellipsoid plots of individual co-crystals of <i>m</i> -IPhO-Cl <sub>6</sub> BsubPc (Chlorobenzene:Heptane; CCDC deposit 2087106). .....                    | 260 |
| <b>Figure S41:</b> Populated unit cell of <i>m</i> -IPhO-Cl <sub>6</sub> BsubPc (Chlorobenzene:Heptane; CCDC deposit 2087106). .....                                                                   | 261 |
| <b>Figure S42:</b> Powder x-ray diffraction of <i>m</i> IPhO-Cl <sub>6</sub> BsubPc (Chlorobenzene:Heptane; CCDC deposit 2087106). .....                                                               | 261 |
| <b>Figure S43:</b> Anisotropic displacement ellipsoid plots of individual co-crystals of <i>m</i> -IPhO-Cl <sub>6</sub> BsubPc (Dichlorobenzene:Heptane; CCDC deposit 2087107). .....                  | 288 |
| <b>Figure S44:</b> Populated unit cell of <i>m</i> -IPhO-Cl <sub>6</sub> BsubPc (Dichlorobenzene:Heptane; CCDC deposit 2087107). .....                                                                 | 289 |
| <b>Figure S45:</b> Powder x-ray diffraction of <i>m</i> IPhO-Cl <sub>6</sub> BsubPc (Dichlorobenzene:Heptane; CCDC deposit 2087107). .....                                                             | 289 |
| <b>Figure S46:</b> Anisotropic displacement ellipsoid plots of individual co-crystals of <i>m</i> -IPhO-Cl <sub>6</sub> BsubPc (Dichlorobenzene:Dimethoxybenzene:Heptane; CCDC deposit 2087105). ..... | 316 |
| <b>Figure S47:</b> Populated unit cell of <i>m</i> -IPhO-Cl <sub>6</sub> BsubPc (Dichlorobenzene:Dimethoxybenzene:Heptane). .....                                                                      | 317 |
| <b>Figure S48:</b> Powder x-ray diffraction of <i>m</i> IPhO-Cl <sub>6</sub> BsubPc (Dichlorobenzene:Dimethoxybenzene:Heptane). .....                                                                  | 317 |

## List of Tables

|                                                                                                                                                                                                                                                                                                                          |    |
|--------------------------------------------------------------------------------------------------------------------------------------------------------------------------------------------------------------------------------------------------------------------------------------------------------------------------|----|
| <b>Table S1.</b> Crystal data and structure refinement for Cl-Cl <sub>6</sub> BsubPc (Toluene:Heptane; CCDC deposit 2087092). .....                                                                                                                                                                                      | 19 |
| <b>Table S2.</b> Atomic coordinates ( x 10 <sup>4</sup> ) and equivalent isotropic displacement parameters (Å <sup>2</sup> x 10 <sup>3</sup> ) for Cl-Cl <sub>6</sub> BsubPc (Toluene:Heptane; CCDC deposit 2087092). U(eq) is defined as one third of the trace of the orthogonalized U <sup>ij</sup> tensor. ....      | 20 |
| <b>Table S3.</b> Bond lengths [Å] and angles [°] for Cl-Cl <sub>6</sub> BsubPc (Toluene:Heptane; CCDC deposit 2087092). ....                                                                                                                                                                                             | 22 |
| <b>Table S4.</b> Anisotropic displacement parameters (Å <sup>2</sup> x 10 <sup>3</sup> ) for Cl-Cl <sub>6</sub> BsubPc (Toluene:Heptane; CCDC deposit 2087092). The anisotropic displacement factor exponent takes the form: $-2\pi^2 [ h^2 a^{*2}U^{11} + \dots + 2 h k a^* b^* U^{12} ]$ . ....                        | 27 |
| <b>Table S5.</b> Hydrogen coordinates ( x 10 <sup>4</sup> ) and isotropic displacement parameters (Å <sup>2</sup> x 10 <sup>3</sup> ) for Cl-Cl <sub>6</sub> BsubPc (Toluene:Heptane; CCDC deposit 2087092). ....                                                                                                        | 29 |
| <b>Table S6.</b> Torsion angles [°] for Cl-Cl <sub>6</sub> BsubPc (Toluene:Heptane; CCDC deposit 2087092). ....                                                                                                                                                                                                          | 30 |
| <b>Table S7.</b> Crystal data and structure refinement for Cl-Cl <sub>6</sub> BsubPc (Chlorobenzene:Heptane; CCDC deposit 2087100). ....                                                                                                                                                                                 | 35 |
| <b>Table S8.</b> Atomic coordinates (x 10 <sup>4</sup> ) and equivalent isotropic displacement parameters (Å <sup>2</sup> x 10 <sup>3</sup> ) for Cl-Cl <sub>6</sub> BsubPc (Chlorobenzene:Heptane; CCDC deposit 2087100). U(eq) is defined as one third of the trace of the orthogonalized U <sup>ij</sup> tensor. .... | 36 |
| <b>Table S9.</b> Bond lengths [Å] and angles [°] for Cl-Cl <sub>6</sub> BsubPc (Chlorobenzene:Heptane; CCDC deposit 2087100). ....                                                                                                                                                                                       | 38 |
| <b>Table S10.</b> Anisotropic displacement parameters (Å <sup>2</sup> x 10 <sup>3</sup> ) for Cl-Cl <sub>6</sub> BsubPc (Chlorobenzene:Heptane; CCDC deposit 2087100). The anisotropic displacement factor exponent takes the form: $-2\pi^2 [ h^2 a^{*2}U^{11} + \dots + 2 h k a^* b^* U^{12} ]$ . ....                 | 43 |
| <b>Table S11.</b> Hydrogen coordinates ( x 10 <sup>4</sup> ) and isotropic displacement parameters (Å <sup>2</sup> x 10 <sup>3</sup> ) for Cl-Cl <sub>6</sub> BsubPc (Chlorobenzene:Heptane; CCDC deposit 2087100). ....                                                                                                 | 45 |
| <b>Table S12.</b> Torsion angles [°] for Cl-Cl <sub>6</sub> BsubPc (Chlorobenzene:Heptane; CCDC deposit 2087100). ....                                                                                                                                                                                                   | 46 |
| <b>Table S13.</b> Crystal data and structure refinement for Cl-Cl <sub>6</sub> BsubPc (DiChlorobenzene:Heptane; CCDC deposit 2087096). ....                                                                                                                                                                              | 51 |

|                                                                                                                                                                                                                                                                                                                                     |    |
|-------------------------------------------------------------------------------------------------------------------------------------------------------------------------------------------------------------------------------------------------------------------------------------------------------------------------------------|----|
| <b>Table S14.</b> Atomic coordinates ( $\times 10^4$ ) and equivalent isotropic displacement parameters ( $\text{\AA}^2 \times 10^3$ ) for Cl-Cl <sub>6</sub> BsubPc (DiChlorobenzene:Heptane; CCDC deposit 2087096). U(eq) is defined as one third of the trace of the orthogonalized U <sup>ij</sup> tensor.....                  | 52 |
| <b>Table S15.</b> Bond lengths [ $\text{\AA}$ ] and angles [ $^\circ$ ] for Cl-Cl <sub>6</sub> BsubPc (DiChlorobenzene:Heptane; CCDC deposit 2087096).....                                                                                                                                                                          | 54 |
| <b>Table S16.</b> Anisotropic displacement parameters ( $\text{\AA}^2 \times 10^3$ ) for Cl-Cl <sub>6</sub> BsubPc (DiChlorobenzene:Heptane; CCDC deposit 2087096). The anisotropic displacement factor exponent takes the form: $-2\pi^2 [ h^2 a^{*2} U^{11} + \dots + 2 h k a^* b^* U^{12} ]$ .....                               | 59 |
| <b>Table S17.</b> Hydrogen coordinates ( $\times 10^4$ ) and isotropic displacement parameters ( $\text{\AA}^2 \times 10^3$ ) for Cl-Cl <sub>6</sub> BsubPc (DiChlorobenzene:Heptane; CCDC deposit 2087096). .....                                                                                                                  | 61 |
| <b>Table S18.</b> Torsion angles [ $^\circ$ ] for Cl-Cl <sub>6</sub> BsubPc (DiChlorobenzene:Heptane; CCDC deposit 2087096). .....                                                                                                                                                                                                  | 62 |
| <b>Table S19.</b> Crystal data and structure refinement for Cl-Cl <sub>6</sub> BsubPc (Dichlorobenzene:Dimethoxybenzene:Heptane; CCDC deposit 2087097). .....                                                                                                                                                                       | 67 |
| <b>Table S20.</b> Atomic coordinates ( $\times 10^4$ ) and equivalent isotropic displacement parameters ( $\text{\AA}^2 \times 10^3$ ) for Cl-Cl <sub>6</sub> BsubPc (Dichlorobenzene:Dimethoxybenzene:Heptane; CCDC deposit 2087097). U(eq) is defined as one third of the trace of the orthogonalized U <sup>ij</sup> tensor..... | 68 |
| <b>Table S21.</b> Bond lengths [ $\text{\AA}$ ] and angles [ $^\circ$ ] for Cl-Cl <sub>6</sub> BsubPc (Dichlorobenzene:Dimethoxybenzene:Heptane; CCDC deposit 2087097). .....                                                                                                                                                       | 70 |
| <b>Table S22.</b> Anisotropic displacement parameters ( $\text{\AA}^2 \times 10^3$ ) for Cl-Cl <sub>6</sub> BsubPc (Dichlorobenzene:Dimethoxybenzene:Heptane; CCDC deposit 2087097). The anisotropic displacement factor exponent takes the form: $-2\pi^2 [ h^2 a^{*2} U^{11} + \dots + 2 h k a^* b^* U^{12} ]$ . .....            | 75 |
| <b>Table S23.</b> Hydrogen coordinates ( $\times 10^4$ ) and isotropic displacement parameters ( $\text{\AA}^2 \times 10^3$ ) for Cl-Cl <sub>6</sub> BsubPc (Dichlorobenzene:Dimethoxybenzene:Heptane; CCDC deposit 2087097). .....                                                                                                 | 77 |
| <b>Table S24.</b> Torsion angles [ $^\circ$ ] for Cl-Cl <sub>6</sub> BsubPc (Dichlorobenzene:Dimethoxybenzene:Heptane; CCDC deposit 2087097). .....                                                                                                                                                                                 | 78 |
| <b>Table S25.</b> Crystal data and structure refinement for PhO-Cl <sub>6</sub> BsubPc (Toluene:Heptane; CCDC deposit 2087093). .....                                                                                                                                                                                               | 84 |
| <b>Table S26.</b> Atomic coordinates ( $\times 10^4$ ) and equivalent isotropic displacement parameters ( $\text{\AA}^2 \times 10^3$ ) for PhO-Cl <sub>6</sub> BsubPc (Toluene:Heptane; CCDC deposit 2087093). U(eq) is defined as one third of the trace of the orthogonalized U <sup>ij</sup> tensor.....                         | 85 |
| <b>Table S27.</b> Bond lengths [ $\text{\AA}$ ] and angles [ $^\circ$ ] for PhO-Cl <sub>6</sub> BsubPc (Toluene:Heptane; CCDC deposit 2087093). .....                                                                                                                                                                               | 87 |

|                                                                                                                                                                                                                                                                                                                        |     |
|------------------------------------------------------------------------------------------------------------------------------------------------------------------------------------------------------------------------------------------------------------------------------------------------------------------------|-----|
| <b>Table S28.</b> Anisotropic displacement parameters ( $\text{\AA}^2 \times 10^3$ ) for PhO-Cl <sub>6</sub> BsubPc (Toluene:Heptane; CCDC deposit 2087093). The anisotropic displacement factor exponent takes the form: $-2\pi^2 [h^2 a^{*2} U^{11} + \dots + 2 h k a^* b^* U^{12}]$ . .....                         | 91  |
| <b>Table S29.</b> Hydrogen coordinates ( $\times 10^4$ ) and isotropic displacement parameters ( $\text{\AA}^2 \times 10^3$ ) for PhO-Cl <sub>6</sub> BsubPc (Toluene:Heptane; CCDC deposit 2087093). .....                                                                                                            | 94  |
| <b>Table S30.</b> Torsion angles [ $^\circ$ ] for PhO-Cl <sub>6</sub> BsubPc (Toluene:Heptane; CCDC deposit 2087093). .....                                                                                                                                                                                            | 95  |
| <b>Table S31.</b> Crystal data and structure refinement for PhO-Cl <sub>6</sub> BsubPc (Chlorobenzene:Heptane; CCDC deposit 2087094). .....                                                                                                                                                                            | 101 |
| <b>Table S32.</b> Atomic coordinates ( $\times 10^4$ ) and equivalent isotropic displacement parameters ( $\text{\AA}^2 \times 10^3$ ) for PhO-Cl <sub>6</sub> BsubPc (Chlorobenzene:Heptane; CCDC deposit 2087094). $U(\text{eq})$ is defined as one third of the trace of the orthogonalized $U^{ij}$ tensor. ....   | 102 |
| <b>Table S33.</b> Bond lengths [ $\text{\AA}$ ] and angles [ $^\circ$ ] for PhO-Cl <sub>6</sub> BsubPc (Chlorobenzene:Heptane; CCDC deposit 2087094). .....                                                                                                                                                            | 104 |
| <b>Table S34.</b> Anisotropic displacement parameters ( $\text{\AA}^2 \times 10^3$ ) for PhO-Cl <sub>6</sub> BsubPc (Chlorobenzene:Heptane; CCDC deposit 2087094). The anisotropic displacement factor exponent takes the form: $-2\pi^2 [h^2 a^{*2} U^{11} + \dots + 2 h k a^* b^* U^{12}]$ .....                     | 112 |
| <b>Table S35.</b> Hydrogen coordinates ( $\times 10^4$ ) and isotropic displacement parameters ( $\text{\AA}^2 \times 10^3$ ) for PhO-Cl <sub>6</sub> BsubPc (Chlorobenzene:Heptane; CCDC deposit 2087094). .....                                                                                                      | 114 |
| <b>Table S36.</b> Torsion angles [ $^\circ$ ] for PhO-Cl <sub>6</sub> BsubPc (Chlorobenzene:Heptane; CCDC deposit 2087094). .....                                                                                                                                                                                      | 116 |
| <b>Table S37.</b> Crystal data and structure refinement for PhO-Cl <sub>6</sub> BsubPc (Dichlorobenzene:Pentane; CCDC deposit 2087095). .....                                                                                                                                                                          | 124 |
| <b>Table S38.</b> Atomic coordinates ( $\times 10^4$ ) and equivalent isotropic displacement parameters ( $\text{\AA}^2 \times 10^3$ ) for PhO-Cl <sub>6</sub> BsubPc (Dichlorobenzene:Pentane; CCDC deposit 2087095). $U(\text{eq})$ is defined as one third of the trace of the orthogonalized $U^{ij}$ tensor. .... | 125 |
| <b>Table S39.</b> Bond lengths [ $\text{\AA}$ ] and angles [ $^\circ$ ] for PhO-Cl <sub>6</sub> BsubPc (Dichlorobenzene:Pentane; CCDC deposit 2087095). .....                                                                                                                                                          | 127 |
| <b>Table S40.</b> Anisotropic displacement parameters ( $\text{\AA}^2 \times 10^3$ ) for PhO-Cl <sub>6</sub> BsubPc (Dichlorobenzene:Pentane; CCDC deposit 2087095). The anisotropic displacement factor exponent takes the form: $-2\pi^2 [h^2 a^{*2} U^{11} + \dots + 2 h k a^* b^* U^{12}]$ . .....                 | 132 |
| <b>Table S41.</b> Hydrogen coordinates ( $\times 10^4$ ) and isotropic displacement parameters ( $\text{\AA}^2 \times 10^3$ ) for PhO-Cl <sub>6</sub> BsubPc (Dichlorobenzene:Pentane; CCDC deposit 2087095). .....                                                                                                    | 134 |

|                                                                                                                                                                                                                                                                                                                                               |     |
|-----------------------------------------------------------------------------------------------------------------------------------------------------------------------------------------------------------------------------------------------------------------------------------------------------------------------------------------------|-----|
| <b>Table S42.</b> Torsion angles [°] for PhO-Cl <sub>6</sub> BsubPc (Dichlorobenzene:Pentane; CCDC deposit 2087095).                                                                                                                                                                                                                          | 135 |
| <b>Table S43.</b> Crystal data and structure refinement for PhO-Cl <sub>6</sub> BsubPc (Dichlorobenzene:Dimethoxybenzene:Pentane; CCDC deposit 2087098).                                                                                                                                                                                      | 141 |
| <b>Table S44.</b> Atomic coordinates (x 10 <sup>4</sup> ) and equivalent isotropic displacement parameters (Å <sup>2</sup> x 10 <sup>3</sup> ) for PhO-Cl <sub>6</sub> BsubPc (Dichlorobenzene:Dimethoxybenzene:Pentane; CCDC deposit 2087098). U(eq) is defined as one third of the trace of the orthogonalized U <sup>ij</sup> tensor. .... | 142 |
| <b>Table S45.</b> Bond lengths [Å] and angles [°] for PhO-Cl <sub>6</sub> BsubPc (Dichlorobenzene:Dimethoxybenzene:Pentane; CCDC deposit 2087098).                                                                                                                                                                                            | 144 |
| <b>Table S46.</b> Anisotropic displacement parameters (Å <sup>2</sup> x 10 <sup>3</sup> ) for PhO-Cl <sub>6</sub> BsubPc (Dichlorobenzene:Dimethoxybenzene:Pentane; CCDC deposit 2087098). The anisotropic displacement factor exponent takes the form: $-2\pi^2[h^2 a^{*2}U^{11} + \dots + 2 h k a^* b^* U^{12}]$ .....                      | 149 |
| <b>Table S47.</b> Hydrogen coordinates (x 10 <sup>4</sup> ) and isotropic displacement parameters (Å <sup>2</sup> x 10 <sup>3</sup> ) for PhO-Cl <sub>6</sub> BsubPc (Dichlorobenzene:Dimethoxybenzene:Pentane; CCDC deposit 2087098).                                                                                                        | 151 |
| <b>Table S48.</b> Torsion angles [°] for PhO-Cl <sub>6</sub> BsubPc (Dichlorobenzene:Dimethoxybenzene:Pentane; CCDC deposit 2087098).                                                                                                                                                                                                         | 152 |
| <b>Table S49.</b> Crystal data and structure refinement for NaphO-Cl <sub>6</sub> BsubPc (Toluene:Heptane; CCDC deposit 2087099).                                                                                                                                                                                                             | 158 |
| <b>Table S50.</b> Atomic coordinates (x 10 <sup>4</sup> ) and equivalent isotropic displacement parameters (Å <sup>2</sup> x 10 <sup>3</sup> ) for NaphO-Cl <sub>6</sub> BsubPc (Toluene:Heptane; CCDC deposit 2087099). U(eq) is defined as one third of the trace of the orthogonalized U <sup>ij</sup> tensor. ....                        | 159 |
| <b>Table S51.</b> Bond lengths [Å] and angles [°] for NaphO-Cl <sub>6</sub> BsubPc (Toluene:Heptane; CCDC deposit 2087099).                                                                                                                                                                                                                   | 161 |
| <b>Table S52.</b> Anisotropic displacement parameters (Å <sup>2</sup> x 10 <sup>3</sup> ) for NaphO-Cl <sub>6</sub> BsubPc (Toluene:Heptane; CCDC deposit 2087099). The anisotropic displacement factor exponent takes the form: $-2\pi^2[h^2 a^{*2}U^{11} + \dots + 2 h k a^* b^* U^{12}]$ .....                                             | 167 |
| <b>Table S53.</b> Hydrogen coordinates (x 10 <sup>4</sup> ) and isotropic displacement parameters (Å <sup>2</sup> x 10 <sup>3</sup> ) for NaphO-Cl <sub>6</sub> BsubPc (Toluene:Heptane; CCDC deposit 2087099).                                                                                                                               | 169 |
| <b>Table S54.</b> Torsion angles [°] for NaphO-Cl <sub>6</sub> BsubPc (Toluene:Heptane; CCDC deposit 2087099).                                                                                                                                                                                                                                | 170 |
| <b>Table S55.</b> Crystal data and structure refinement for NaphO-Cl <sub>6</sub> BsubPc (Chlorobenzene:Heptane; CCDC deposit 2087101).                                                                                                                                                                                                       | 177 |



|                                                                                                                                                                                                                                                                                                                                           |     |
|-------------------------------------------------------------------------------------------------------------------------------------------------------------------------------------------------------------------------------------------------------------------------------------------------------------------------------------------|-----|
| <b>Table S56.</b> Atomic coordinates ( $\times 10^4$ ) and equivalent isotropic displacement parameters ( $\text{\AA}^2 \times 10^3$ ) for NaphO-Cl <sub>6</sub> BsubPc (Chlorobenzene:Heptane; CCDC deposit 2087101). $U(\text{eq})$ is defined as one third of the trace of the orthogonalized $U_{ij}$ tensor.....                     | 178 |
| <b>Table S57.</b> Bond lengths [ $\text{\AA}$ ] and angles [ $^\circ$ ] for NaphO-Cl <sub>6</sub> BsubPc (Chlorobenzene:Heptane; CCDC deposit 2087101).....                                                                                                                                                                               | 180 |
| <b>Table S58.</b> Anisotropic displacement parameters ( $\text{\AA}^2 \times 10^3$ ) for NaphO-Cl <sub>6</sub> BsubPc (Chlorobenzene:Heptane; CCDC deposit 2087101). The anisotropic displacement factor exponent takes the form: $-2\pi^2 [h^2 a^{*2} U^{11} + \dots + 2 h k a^* b^* U^{12}]$ .....                                      | 186 |
| <b>Table S59.</b> Hydrogen coordinates ( $\times 10^4$ ) and isotropic displacement parameters ( $\text{\AA}^2 \times 10^3$ ) for NaphO-Cl <sub>6</sub> BsubPc (Chlorobenzene:Heptane; CCDC deposit 2087101). .....                                                                                                                       | 188 |
| <b>Table S60.</b> Torsion angles [ $^\circ$ ] for NaphO-Cl <sub>6</sub> BsubPc (Chlorobenzene:Heptane; CCDC deposit 2087101).....                                                                                                                                                                                                         | 189 |
| <b>Table S61.</b> Crystal data and structure refinement for NaphO-Cl <sub>6</sub> BsubPc (Dichlorobenzene:Heptane; CCDC deposit 2087104). .....                                                                                                                                                                                           | 196 |
| <b>Table S62.</b> Atomic coordinates ( $\times 10^4$ ) and equivalent isotropic displacement parameters ( $\text{\AA}^2 \times 10^3$ ) for NaphO-Cl <sub>6</sub> BsubPc (Dichlorobenzene:Heptane; CCDC deposit 2087104). $U(\text{eq})$ is defined as one third of the trace of the orthogonalized $U_{ij}$ tensor.....                   | 197 |
| <b>Table S63.</b> Bond lengths [ $\text{\AA}$ ] and angles [ $^\circ$ ] for NaphO-Cl <sub>6</sub> BsubPc (Dichlorobenzene:Heptane; CCDC deposit 2087104).....                                                                                                                                                                             | 199 |
| <b>Table S64.</b> Anisotropic displacement parameters ( $\text{\AA}^2 \times 10^3$ ) for NaphO-Cl <sub>6</sub> BsubPc (Dichlorobenzene:Heptane; CCDC deposit 2087104). The anisotropic displacement factor exponent takes the form: $-2\pi^2 [h^2 a^{*2} U^{11} + \dots + 2 h k a^* b^* U^{12}]$ .....                                    | 205 |
| <b>Table S65.</b> Hydrogen coordinates ( $\times 10^4$ ) and isotropic displacement parameters ( $\text{\AA}^2 \times 10^3$ ) for NaphO-Cl <sub>6</sub> BsubPc (Dichlorobenzene:Heptane; CCDC deposit 2087104). .....                                                                                                                     | 207 |
| <b>Table S66.</b> Torsion angles [ $^\circ$ ] for NaphO-Cl <sub>6</sub> BsubPc (Dichlorobenzene:Heptane; CCDC deposit 2087104). .....                                                                                                                                                                                                     | 208 |
| <b>Table S67.</b> Crystal data and structure refinement for NaphO-Cl <sub>6</sub> BsubPc (Dichlorobenzene:Dimethoxybenzene:Heptane; CCDC deposit 2087102). .....                                                                                                                                                                          | 215 |
| <b>Table S68.</b> Atomic coordinates ( $\times 10^4$ ) and equivalent isotropic displacement parameters ( $\text{\AA}^2 \times 10^3$ ) for NaphO-Cl <sub>6</sub> BsubPc (Dichlorobenzene:Dimethoxybenzene:Heptane; CCDC deposit 2087102). $U(\text{eq})$ is defined as one third of the trace of the orthogonalized $U_{ij}$ tensor. .... | 216 |
| <b>Table S69.</b> Bond lengths [ $\text{\AA}$ ] and angles [ $^\circ$ ] for NaphO-Cl <sub>6</sub> BsubPc (Dichlorobenzene:Dimethoxybenzene:Heptane; CCDC deposit 2087102). .....                                                                                                                                                          | 218 |

|                                                                                                                                                                                                                                                                                                                                   |     |
|-----------------------------------------------------------------------------------------------------------------------------------------------------------------------------------------------------------------------------------------------------------------------------------------------------------------------------------|-----|
| <b>Table S70.</b> Anisotropic displacement parameters ( $\text{\AA}^2 \times 10^3$ ) for NaphO-Cl <sub>6</sub> BsubPc (Dichlorobenzene:Dimethoxybenzene:Heptane; CCDC deposit 2087102). The anisotropic displacement factor exponent takes the form: $-2\pi^2 [ h^2 a^{*2} U^{11} + \dots + 2 h k a^* b^* U^{12} ]$ .....224      | 224 |
| <b>Table S71.</b> Hydrogen coordinates ( $\times 10^4$ ) and isotropic displacement parameters ( $\text{\AA}^2 \times 10^3$ ) for NaphO-Cl <sub>6</sub> BsubPc (Dichlorobenzene:Dimethoxybenzene:Heptane; CCDC deposit 2087102). 226                                                                                              | 226 |
| <b>Table S72.</b> Torsion angles [ $^\circ$ ] for NaphO-Cl <sub>6</sub> BsubPc (Dichlorobenzene:Dimethoxybenzene:Heptane; CCDC deposit 2087102). .....227                                                                                                                                                                         | 227 |
| <b>Table S73.</b> Crystal data and structure refinement for <i>m</i> -IPhO-Cl <sub>6</sub> BsubPc (Toluene:Heptane; CCDC deposit 2087103).....234                                                                                                                                                                                 | 234 |
| <b>Table S74.</b> Atomic coordinates ( $\times 10^4$ ) and equivalent isotropic displacement parameters ( $\text{\AA}^2 \times 10^3$ ) for <i>m</i> -IPhO-Cl <sub>6</sub> BsubPc (Toluene:Heptane; CCDC deposit 2087103). $U(\text{eq})$ is defined as one third of the trace of the orthogonalized $U^{ij}$ tensor. ....235      | 235 |
| <b>Table S75.</b> Bond lengths [ $\text{\AA}$ ] and angles [ $^\circ$ ] for <i>m</i> -IPhO-Cl <sub>6</sub> BsubPc (Toluene:Heptane; CCDC deposit 2087103). ....238                                                                                                                                                                | 238 |
| <b>Table S76.</b> Anisotropic displacement parameters ( $\text{\AA}^2 \times 10^3$ ) for <i>m</i> -IPhO-Cl <sub>6</sub> BsubPc (Toluene:Heptane; CCDC deposit 2087103). The anisotropic displacement factor exponent takes the form: $-2\pi^2 [ h^2 a^{*2} U^{11} + \dots + 2 h k a^* b^* U^{12} ]$ . ....248                     | 248 |
| <b>Table S77.</b> Hydrogen coordinates ( $\times 10^4$ ) and isotropic displacement parameters ( $\text{\AA}^2 \times 10^3$ ) for <i>m</i> -IPhO-Cl <sub>6</sub> BsubPc (Toluene:Heptane; CCDC deposit 2087103). ....251                                                                                                          | 251 |
| <b>Table S78.</b> Torsion angles [ $^\circ$ ] for <i>m</i> -IPhO-Cl <sub>6</sub> BsubPc (Toluene:Heptane; CCDC deposit 2087103). .....252                                                                                                                                                                                         | 252 |
| <b>Table S79.</b> Crystal data and structure refinement for <i>m</i> -IPhO-Cl <sub>6</sub> BsubPc (Chlorobenzene:Heptane; CCDC deposit 2087106). ....262                                                                                                                                                                          | 262 |
| <b>Table S80.</b> Atomic coordinates ( $\times 10^4$ ) and equivalent isotropic displacement parameters ( $\text{\AA}^2 \times 10^3$ ) for <i>m</i> -IPhO-Cl <sub>6</sub> BsubPc (Chlorobenzene:Heptane; CCDC deposit 2087106). $U(\text{eq})$ is defined as one third of the trace of the orthogonalized $U^{ij}$ tensor.....263 | 263 |
| <b>Table S81.</b> Bond lengths [ $\text{\AA}$ ] and angles [ $^\circ$ ] for <i>m</i> -IPhO-Cl <sub>6</sub> BsubPc (Chlorobenzene:Heptane; CCDC deposit 2087106).....266                                                                                                                                                           | 266 |
| <b>Table S82.</b> Anisotropic displacement parameters ( $\text{\AA}^2 \times 10^3$ ) for <i>m</i> -IPhO-Cl <sub>6</sub> BsubPc (Chlorobenzene:Heptane; CCDC deposit 2087106). The anisotropic displacement factor exponent takes the form: $-2\pi^2 [ h^2 a^{*2} U^{11} + \dots + 2 h k a^* b^* U^{12} ]$ .....276                | 276 |
| <b>Table S83.</b> Hydrogen coordinates ( $\times 10^4$ ) and isotropic displacement parameters ( $\text{\AA}^2 \times 10^3$ ) for <i>m</i> -IPhO-Cl <sub>6</sub> BsubPc (Chlorobenzene:Heptane; CCDC deposit 2087106). ....279                                                                                                    | 279 |

|                                                                                                                                                                                                                                                                                                                                                          |     |
|----------------------------------------------------------------------------------------------------------------------------------------------------------------------------------------------------------------------------------------------------------------------------------------------------------------------------------------------------------|-----|
| <b>Table S84.</b> Torsion angles [°] for <i>m</i> -IPhO-Cl <sub>6</sub> BsubPc (Chlorobenzene:Heptane; CCDC deposit 2087106).....                                                                                                                                                                                                                        | 280 |
| <b>Table S85.</b> Crystal data and structure refinement for <i>m</i> -IPhO-Cl <sub>6</sub> BsubPc (Dichlorobenzene:Heptane; CCDC deposit 2087107). .....                                                                                                                                                                                                 | 290 |
| <b>Table S86.</b> Atomic coordinates (x 10 <sup>4</sup> ) and equivalent isotropic displacement parameters (Å <sup>2</sup> x 10 <sup>3</sup> ) for <i>m</i> -IPhO-Cl <sub>6</sub> BsubPc (Dichlorobenzene:Heptane; CCDC deposit 2087107). U(eq) is defined as one third of the trace of the orthogonalized U <sup>ij</sup> tensor.....                   | 291 |
| <b>Table S87.</b> Bond lengths [Å] and angles [°] for <i>m</i> -IPhO-Cl <sub>6</sub> BsubPc (Dichlorobenzene:Heptane; CCDC deposit 2087107).....                                                                                                                                                                                                         | 294 |
| <b>Table S88.</b> Anisotropic displacement parameters (Å <sup>2</sup> x 10 <sup>3</sup> ) for <i>m</i> -IPhO-Cl <sub>6</sub> BsubPc (Dichlorobenzene:Heptane; CCDC deposit 2087107). The anisotropic displacement factor exponent takes the form: $-2\pi^2[h^2 a^{*2}U^{11} + \dots + 2 h k a^* b^* U^{12}]$ .....                                       | 304 |
| <b>Table S89.</b> Hydrogen coordinates (x 10 <sup>4</sup> ) and isotropic displacement parameters (Å <sup>2</sup> x 10 <sup>3</sup> ) for <i>m</i> -IPhO-Cl <sub>6</sub> BsubPc (Dichlorobenzene:Heptane; CCDC deposit 2087107). .....                                                                                                                   | 307 |
| <b>Table S90.</b> Torsion angles [°] for <i>m</i> -IPhO-Cl <sub>6</sub> BsubPc (Dichlorobenzene:Heptane; CCDC deposit 2087107).....                                                                                                                                                                                                                      | 308 |
| <b>Table S91.</b> Crystal data and structure refinement for <i>m</i> -IPhO-Cl <sub>6</sub> BsubPc (Dichlorobenzene:Dimethoxybenzene:Heptane; CCDC deposit 2087105). .....                                                                                                                                                                                | 318 |
| <b>Table S92.</b> Atomic coordinates (x 10 <sup>4</sup> ) and equivalent isotropic displacement parameters (Å <sup>2</sup> x 10 <sup>3</sup> ) for <i>m</i> -IPhO-Cl <sub>6</sub> BsubPc (Dichlorobenzene:Dimethoxybenzene:Heptane; CCDC deposit 2087105). U(eq) is defined as one third of the trace of the orthogonalized U <sup>ij</sup> tensor. .... | 319 |
| <b>Table S93.</b> Bond lengths [Å] and angles [°] for <i>m</i> -IPhO-Cl <sub>6</sub> BsubPc (Dichlorobenzene:Dimethoxybenzene:Heptane; CCDC deposit 2087105). .....                                                                                                                                                                                      | 322 |
| <b>Table S94.</b> Anisotropic displacement parameters (Å <sup>2</sup> x 10 <sup>3</sup> ) for <i>m</i> -IPhO-Cl <sub>6</sub> BsubPc (Dichlorobenzene:Dimethoxybenzene:Heptane; CCDC deposit 2087105). The anisotropic displacement factor exponent takes the form: $-2\pi^2[h^2 a^{*2}U^{11} + \dots + 2 h k a^* b^* U^{12}]$ .....                      | 332 |
| <b>Table S95.</b> Hydrogen coordinates (x 10 <sup>4</sup> ) and isotropic displacement parameters (Å <sup>2</sup> x 10 <sup>3</sup> ) for <i>m</i> -IPhO-Cl <sub>6</sub> BsubPc (Dichlorobenzene:Dimethoxybenzene:Heptane; CCDC deposit 2087105).....                                                                                                    | 334 |
| <b>Table S96.</b> Torsion angles [°] for <i>m</i> -IPhO-Cl <sub>6</sub> BsubPc (Dichlorobenzene:Dimethoxybenzene:Heptane; CCDC deposit 2087105). .....                                                                                                                                                                                                   | 335 |

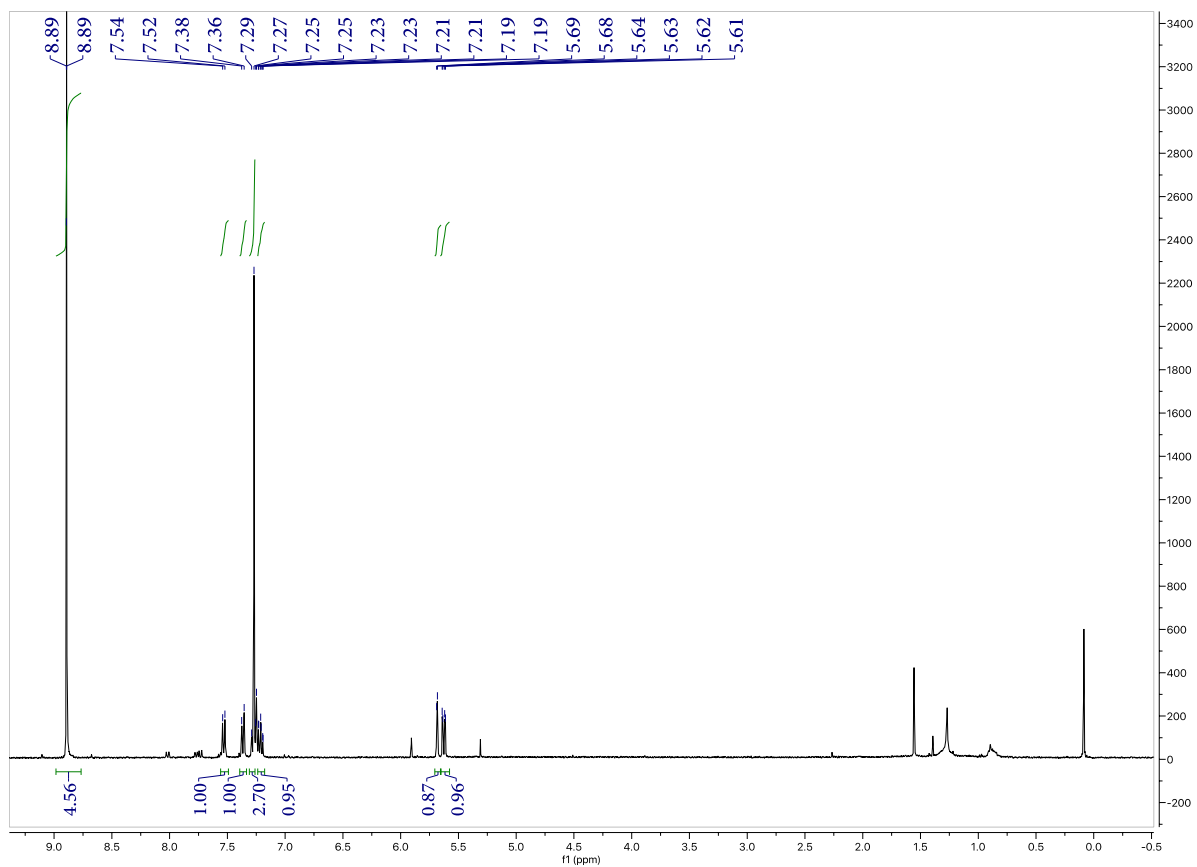

Figure S1:  $^1\text{H}$  NMR spectrum of NaphO-Cl<sub>6</sub>BsubPc.

### Single Mass Analysis

Tolerance = 10.0 PPM / DBE: min = -1.5, max = 50.0

Element prediction: Off

Monoisotopic Mass, Odd and Even Electron Ions

3477 formula(e) evaluated with 103 results within limits (all results (up to 1000) for each mass)

Elements Used:

C: 0-500 H: 0-1000 B: 1-1 N: 0-10 O: 0-10 Cl: 5-6 74Ge: 0-2

kw-02-35 column 1

UofT GCT

07-Oct-2019

14:40:09

TOF MS E+

5.89e+005

191007\_2644 468 (7.801) Cm (444:468-35:80x3.000)

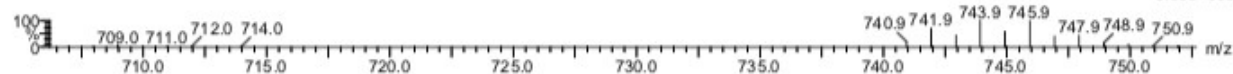

Minimum: -1.5  
Maximum: 5.0 10.0 50.0

| Mass     | Calc. Mass | mDa  | PPM  | DBE  | i-FIT   | Formula                    |
|----------|------------|------|------|------|---------|----------------------------|
| 741.9376 | 741.9375   | 0.1  | 0.1  | 21.0 | 1692.1  | C23 H12 B N10 O8 Cl5       |
|          | 741.9375   | 0.1  | 0.1  | 29.0 | 9813.5  | C34 H13 B N6 O Cl6         |
|          | 741.9377   | -0.1 | -0.1 | 4.5  | 33294.7 | C22 H35 B N3 O2 Cl6 74Ge2  |
|          | 741.9378   | -0.2 | -0.3 | 21.0 | 20189.8 | C32 H22 B N2 O3 Cl5 74Ge   |
|          | 741.9372   | 0.4  | 0.5  | 9.0  | 43730.0 | C25 H32 B N2 O3 Cl5 74Ge2  |
|          | 741.9370   | 0.6  | 0.8  | 9.0  | 17804.5 | C16 H22 B N10 O8 Cl5 74Ge  |
|          | 741.9370   | 0.6  | 0.8  | 33.5 | 3186.9  | C37 H10 B N5 O2 Cl5        |
|          | 741.9383   | -0.7 | -0.9 | 16.5 | 11685.1 | C29 H25 B N3 O2 Cl6 74Ge   |
|          | 741.9383   | -0.7 | -0.9 | 8.5  | 17734.7 | C18 H24 B N7 O9 Cl5 74Ge   |
|          | 741.9369   | 0.7  | 0.9  | 17.0 | 11365.0 | C27 H23 B N6 O Cl6 74Ge    |
|          | 741.9384   | -0.8 | -1.1 | 33.0 | 3608.4  | C39 H12 B N2 O3 Cl5        |
|          | 741.9364   | 1.2  | 1.6  | 5.0  | 33064.6 | C20 H33 B N6 O Cl6 74Ge2   |
|          | 741.9388   | -1.2 | -1.6 | 28.5 | 10150.5 | C36 H15 B N3 O2 Cl6        |
|          | 741.9364   | 1.2  | 1.6  | 21.5 | 19876.4 | C30 H20 B N5 O2 Cl5 74Ge   |
|          | 741.9388   | -1.2 | -1.6 | 4.0  | 9702.8  | C15 H27 B N8 O8 Cl6 74Ge   |
|          | 741.9389   | -1.3 | -1.8 | 20.5 | 1781.7  | C25 H14 B N7 O9 Cl5        |
|          | 741.9362   | 1.4  | 1.9  | 29.5 | 9525.5  | C32 H11 B N9 Cl6           |
|          | 741.9362   | 1.4  | 1.9  | 24.0 | 9636.0  | C33 H17 B N2 O5 Cl6        |
|          | 741.9390   | -1.4 | -1.9 | 4.0  | 33488.9 | C24 H37 B O3 Cl6 74Ge2     |
|          | 741.9359   | 1.7  | 2.3  | 9.5  | 43642.1 | C23 H30 B N5 O2 Cl5 74Ge2  |
|          | 741.9394   | -1.8 | -2.4 | 16.0 | 9659.3  | C22 H17 B N8 O8 Cl6        |
|          | 741.9357   | 1.9  | 2.6  | 34.0 | 2765.9  | C35 H8 B N8 O Cl5          |
|          | 741.9357   | 1.9  | 2.6  | 28.5 | 2652.0  | C36 H14 B N O6 Cl5         |
|          | 741.9356   | 2.0  | 2.7  | 17.5 | 11069.3 | C25 H21 B N9 Cl6 74Ge      |
|          | 741.9396   | -2.0 | -2.7 | 16.0 | 12115.5 | C31 H27 B O3 Cl6 74Ge      |
|          | 741.9396   | -2.0 | -2.7 | 8.0  | 17726.7 | C20 H26 B N4 O10 Cl5 74Ge  |
|          | 741.9356   | 2.0  | 2.7  | 12.0 | 10600.5 | C26 H27 B N2 O5 Cl6 74Ge   |
|          | 741.9399   | -2.3 | -3.1 | 13.5 | 44872.3 | C28 H30 B N3 Cl5 74Ge2     |
|          | 741.9353   | 2.3  | 3.1  | 12.0 | 10301.2 | C17 H17 B N10 O10 Cl6      |
|          | 741.9351   | 2.5  | 3.4  | 22.0 | 19608.9 | C28 H18 B N8 O Cl5 74Ge    |
|          | 741.9351   | 2.5  | 3.4  | 16.5 | 18935.7 | C29 H24 B N O6 Cl5 74Ge    |
|          | 741.9401   | -2.5 | -3.4 | 3.5  | 9719.8  | C17 H29 B N5 O9 Cl6 74Ge   |
|          | 741.9402   | -2.6 | -3.5 | 20.0 | 1929.4  | C27 H16 B N4 O10 Cl5       |
|          | 741.9350   | 2.6  | 3.5  | 0.0  | 32464.3 | C19 H37 B N2 O5 Cl6 74Ge2  |
|          | 741.9350   | 2.6  | 3.5  | 5.5  | 32959.8 | C18 H31 B N9 Cl6 74Ge2     |
|          | 741.9402   | -2.6 | -3.5 | 28.0 | 10623.0 | C38 H17 B O3 Cl6           |
|          | 741.9404   | -2.8 | -3.8 | 1.0  | 42932.6 | C14 H32 B N8 O6 Cl5 74Ge2  |
|          | 741.9348   | 2.8  | 3.8  | 24.5 | 9392.2  | C31 H15 B N5 O4 Cl6        |
|          | 741.9348   | 2.8  | 3.8  | 0.0  | 10311.4 | C10 H27 B N10 O10 Cl6 74Ge |
|          | 741.9405   | -2.9 | -3.9 | 25.5 | 21755.2 | C35 H20 B N3 Cl5 74Ge      |
|          | 741.9407   | -3.1 | -4.2 | 15.5 | 9744.5  | C24 H19 B N5 O9 Cl6        |
|          | 741.9345   | 3.1  | 4.2  | 4.5  | 42914.3 | C22 H34 B N O6 Cl5 74Ge2   |
|          | 741.9345   | 3.1  | 4.2  | 10.0 | 43443.4 | C21 H28 B N8 O Cl5 74Ge2   |
|          | 741.9343   | 3.3  | 4.4  | 29.0 | 2344.7  | C34 H12 B N4 O5 Cl5        |
|          | 741.9343   | 3.3  | 4.4  | 12.5 | 10382.3 | C24 H25 B N5 O4 Cl6 74Ge   |
|          | 741.9410   | -3.4 | -4.6 | 37.5 | 4912.3  | C42 H10 B N3 Cl5           |
|          | 741.9410   | -3.4 | -4.6 | 13.0 | 18242.8 | C21 H22 B N8 O6 Cl5 74Ge   |
|          | 741.9412   | -3.6 | -4.9 | 13.0 | 45203.9 | C30 H32 B O Cl5 74Ge2      |
|          | 741.9338   | 3.8  | 5.1  | 17.0 | 18770.6 | C27 H22 B N4 O5 Cl5 74Ge   |
|          | 741.9415   | -3.9 | -5.3 | 25.0 | 2040.6  | C28 H12 B N8 O6 Cl5        |
|          | 741.9415   | -3.9 | -5.3 | 3.0  | 9777.7  | C19 H31 B N2 O10 Cl6 74Ge  |
|          | 741.9337   | 3.9  | 5.3  | 0.5  | 32370.0 | C17 H35 B N5 O4 Cl6 74Ge2  |
|          | 741.9415   | -3.9 | -5.3 | 8.5  | 10019.4 | C18 H25 B N9 O5 Cl6 74Ge   |
|          | 741.9335   | 4.1  | 5.5  | 19.5 | 9385.1  | C30 H19 B N O8 Cl6         |
|          | 741.9335   | 4.1  | 5.5  | 25.0 | 9173.4  | C29 H13 B N8 O3 Cl6        |

| Mass     | Calc. Mass | mDa   | PPM  | DBE     | i-FIT                      | Formula |
|----------|------------|-------|------|---------|----------------------------|---------|
| 741.9417 | -4.1       | -5.5  | 8.5  | 34825.4 | C27 H35 B N C16 74Ge2      |         |
| 741.9418 | -4.2       | -5.7  | 0.5  | 42828.0 | C16 H34 B N5 O7 C15 74Ge2  |         |
| 741.9418 | -4.2       | -5.7  | 25.0 | 22274.6 | C37 H22 B O C15 74Ge       |         |
| 741.9332 | 4.4        | 5.9   | 5.0  | 42875.0 | C20 H32 B N4 O5 C15 74Ge2  |         |
| 741.9420 | -4.4       | -5.9  | 15.0 | 9931.2  | C26 H21 B N2 O10 C16       |         |
| 741.9420 | -4.4       | -5.9  | 20.5 | 9630.0  | C25 H15 B N9 O5 C16        |         |
| 741.9330 | 4.6        | 6.2   | 29.5 | 2066.3  | C32 H10 B N7 O4 C15        |         |
| 741.9330 | 4.6        | 6.2   | 24.0 | 2031.8  | C33 H16 B O9 C15           |         |
| 741.9329 | 4.7        | 6.3   | 7.5  | 9833.2  | C23 H29 B N O8 C16 74Ge    |         |
| 741.9423 | -4.7       | -6.3  | 12.5 | 18379.6 | C23 H24 B N5 O7 C15 74Ge   |         |
| 741.9423 | -4.7       | -6.3  | 20.5 | 13670.1 | C34 H25 B N C16 74Ge       |         |
| 741.9329 | 4.7        | 6.3   | 13.0 | 10224.1 | C22 H23 B N8 O3 C16 74Ge   |         |
| 741.9424 | -4.8       | -6.5  | 37.0 | 5524.9  | C44 H12 B O C15            |         |
| 741.9428 | -5.2       | -7.0  | 8.0  | 10192.1 | C20 H27 B N6 O6 C16 74Ge   |         |
| 741.9324 | 5.2        | 7.0   | 12.0 | 18083.8 | C26 H26 B O9 C15 74Ge      |         |
| 741.9324 | 5.2        | 7.0   | 17.5 | 18599.6 | C25 H20 B N7 O4 C15 74Ge   |         |
| 741.9429 | -5.3       | -7.1  | 24.5 | 2347.3  | C30 H14 B N5 O7 C15        |         |
| 741.9429 | -5.3       | -7.1  | 32.5 | 11595.9 | C41 H15 B N C16            |         |
| 741.9323 | 5.3        | 7.1   | 1.0  | 32439.5 | C15 H33 B N8 O3 C16 74Ge2  |         |
| 741.9321 | 5.5        | 7.4   | 20.0 | 9318.0  | C28 H17 B N4 O7 C16        |         |
| 741.9431 | -5.5       | -7.4  | 0.0  | 42910.4 | C18 H36 B N2 O8 C15 74Ge2  |         |
| 741.9431 | -5.5       | -7.4  | 5.5  | 43394.3 | C17 H30 B N9 O3 C15 74Ge2  |         |
| 741.9319 | 5.7        | 7.7   | 5.5  | 42907.8 | C18 H30 B N7 O4 C15 74Ge2  |         |
| 741.9319 | 5.7        | 7.7   | 0.0  | 42383.2 | C19 H36 B O9 C15 74Ge2     |         |
| 741.9434 | -5.8       | -7.8  | 20.0 | 9849.6  | C27 H17 B N6 O6 C16        |         |
| 741.9317 | 5.9        | 8.0   | 30.0 | 1878.2  | C30 H8 B N10 O3 C15        |         |
| 741.9317 | 5.9        | 8.0   | 24.5 | 1866.6  | C31 H14 B N3 O8 C15        |         |
| 741.9316 | 6.0        | 8.1   | 8.0  | 9774.2  | C21 H27 B N4 O7 C16 74Ge   |         |
| 741.9436 | -6.0       | -8.1  | 1.0  | 32861.5 | C14 H33 B N10 O2 C16 74Ge2 |         |
| 741.9437 | -6.1       | -8.2  | 12.0 | 18674.0 | C25 H26 B N2 O8 C15 74Ge   |         |
| 741.9437 | -6.1       | -8.2  | 17.5 | 19187.7 | C24 H20 B N9 O3 C15 74Ge   |         |
| 741.9441 | -6.5       | -8.8  | 13.0 | 10802.7 | C21 H23 B N10 O2 C16 74Ge  |         |
| 741.9311 | 6.5        | 8.8   | 18.0 | 18517.4 | C23 H18 B N10 O3 C15 74Ge  |         |
| 741.9311 | 6.5        | 8.8   | 12.5 | 18012.4 | C24 H24 B N3 O8 C15 74Ge   |         |
| 741.9442 | -6.6       | -8.9  | 29.5 | 2713.6  | C31 H10 B N9 O3 C15        |         |
| 741.9442 | -6.6       | -8.9  | 7.5  | 10444.4 | C22 H29 B N3 O7 C16 74Ge   |         |
| 741.9442 | -6.6       | -8.9  | 24.0 | 2721.6  | C32 H16 B N2 O8 C15        |         |
| 741.9308 | 6.8        | 9.2   | 20.5 | 9252.5  | C26 H15 B N7 O6 C16        |         |
| 741.9444 | -6.8       | -9.2  | 5.0  | 43548.2 | C19 H32 B N6 O4 C15 74Ge2  |         |
| 741.9305 | 7.1        | 9.6   | 6.0  | 42980.1 | C16 H28 B N10 O3 C15 74Ge2 |         |
| 741.9447 | -7.1       | -9.6  | 19.5 | 10106.6 | C29 H19 B N3 O7 C16        |         |
| 741.9305 | 7.1        | 9.6   | 0.5  | 42487.7 | C17 H34 B N3 O8 C15 74Ge2  |         |
| 741.9447 | -7.1       | -9.6  | 25.0 | 9876.4  | C28 H13 B N10 O2 C16       |         |
| 741.9449 | -7.3       | -9.8  | 0.5  | 33061.1 | C16 H35 B N7 O3 C16 74Ge2  |         |
| 741.9303 | 7.3        | 9.8   | 33.0 | 10809.8 | C40 H13 B N2 C16           |         |
| 741.9303 | 7.3        | 9.8   | 25.0 | 1746.8  | C29 H12 B N6 O7 C15        |         |
| 741.9450 | -7.4       | -10.0 | 17.0 | 19501.0 | C26 H22 B N6 O4 C15 74Ge   |         |
| 741.9302 | 7.4        | 10.0  | 8.5  | 9786.9  | C19 H25 B N7 O6 C16 74Ge   |         |

Figure S2: EI+ Mass Spectrum of NaphO-Cl<sub>6</sub>SubPc.

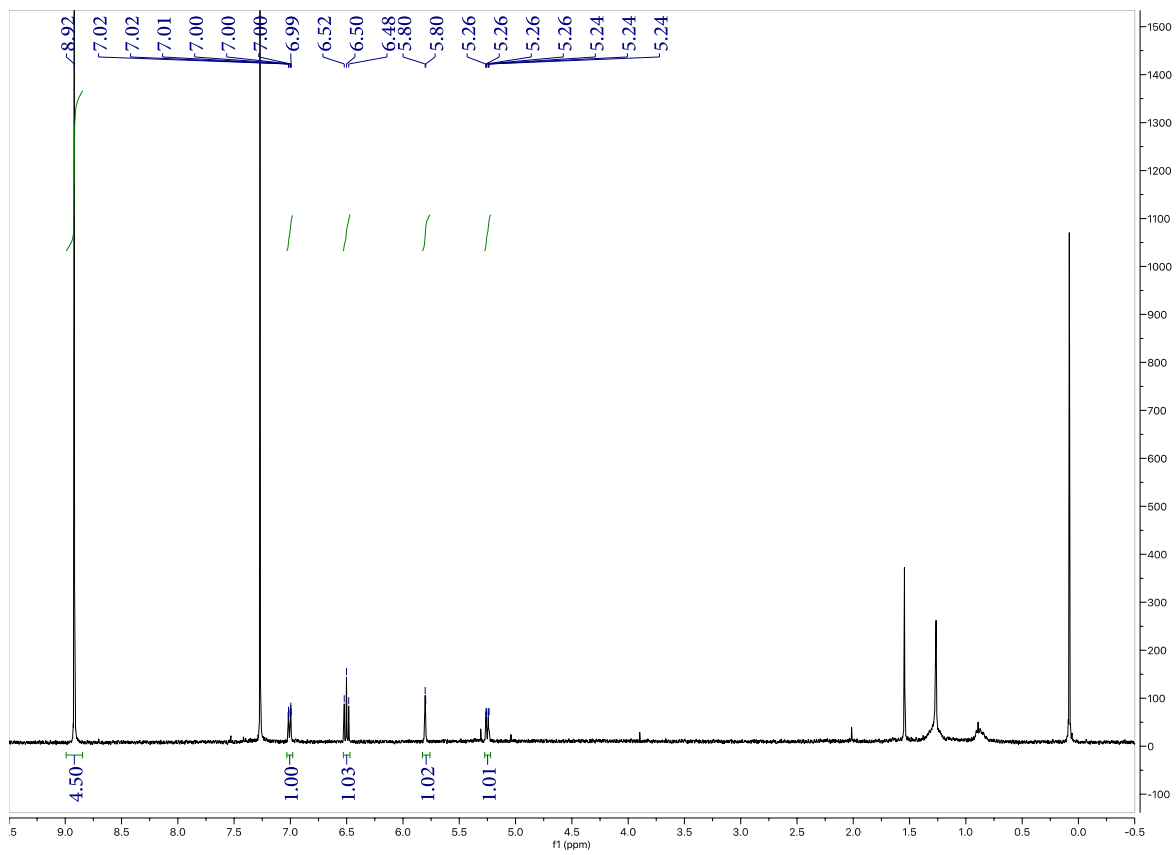

Figure S3:  $^1\text{H}$  NMR Spectrum of *mIPhO-Cl<sub>6</sub>BsubPc*.

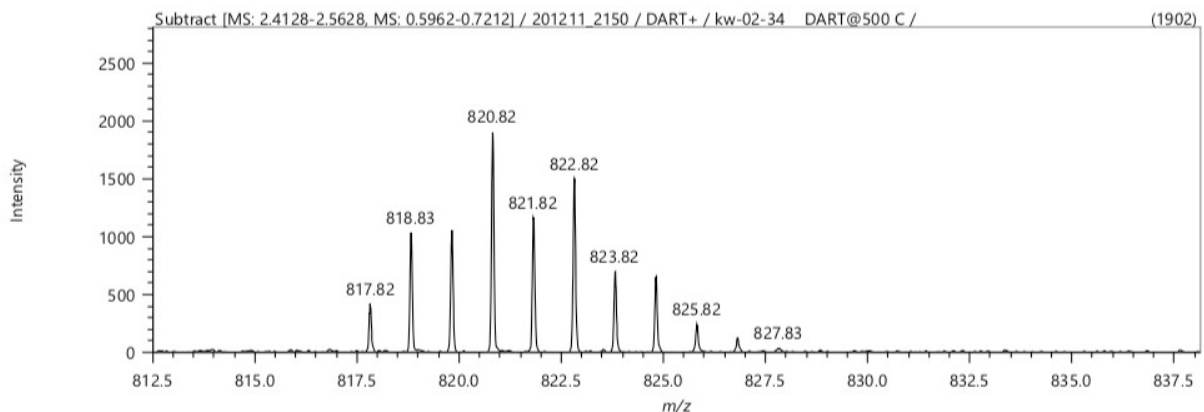

Elemental Composition

Parameters

Tolerance:  $\pm 10.00$  mDa  
 Electron: Odd/Even  
 Charge: +1  
 DBE: -1.5 - 100.0

Elements Set 1:

| Symbol | C   | H   | O | N | B | Cl | I |
|--------|-----|-----|---|---|---|----|---|
| Min    | 0   | 0   | 1 | 0 | 0 | 4  | 0 |
| Max    | 100 | 100 | 1 | 6 | 1 | 6  | 1 |

Results

| Mass      | Intensity | Formula              | Calculated Mass | Mass Difference [mDa] | Mass Difference [ppm] | DBE  |
|-----------|-----------|----------------------|-----------------|-----------------------|-----------------------|------|
| 818.82665 | 1035.05   | C45 B N3 O Cl6       | 818.82601       | 0.64                  | 0.78                  | 45.0 |
|           |           | C30 H11 B N6 O Cl6 I | 818.82578       | 0.88                  | 1.07                  | 25.5 |
|           |           | C41 H5 B N2 O Cl4 I  | 818.82882       | -2.17                 | -2.65                 | 38.5 |
|           |           | C43 H6 N O Cl4 I     | 818.82427       | 2.38                  | 2.91                  | 39.0 |
|           |           | C40 H10 B O Cl5 I    | 818.83065       | -4.00                 | -4.89                 | 33.5 |
|           |           | C47 H N2 O Cl6       | 818.82146       | 5.20                  | 6.35                  | 45.5 |
|           |           | C34 H9 N6 O Cl5 I    | 818.83197       | -5.32                 | -6.49                 | 30.5 |
|           |           | C32 H12 N5 O Cl6 I   | 818.82122       | 5.43                  | 6.63                  | 26.0 |
|           |           | C33 H14 N4 O Cl6 I   | 818.83380       | -7.15                 | -8.73                 | 25.5 |
|           |           | C48 H3 N O Cl6       | 818.83403       | -7.38                 | -9.01                 | 45.0 |
|           |           | C39 H8 B N O Cl5 I   | 818.81808       | 8.57                  | 10.47                 | 34.0 |

Figure S4: DART Mass Spectrum of NaphO-Cl<sub>6</sub>BsubPc.



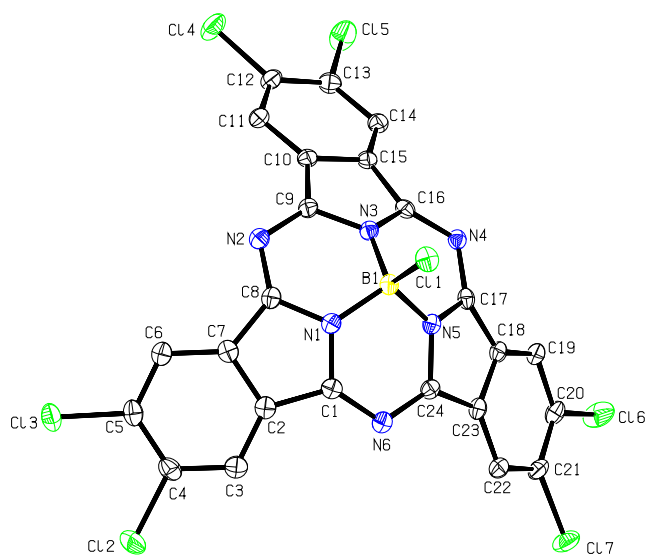

Figure S5: Anisotropic displacement ellipsoid plots of Cl-Cl<sub>6</sub> BsubPc (Toluene:Heptane; CCDC deposit 2087092).

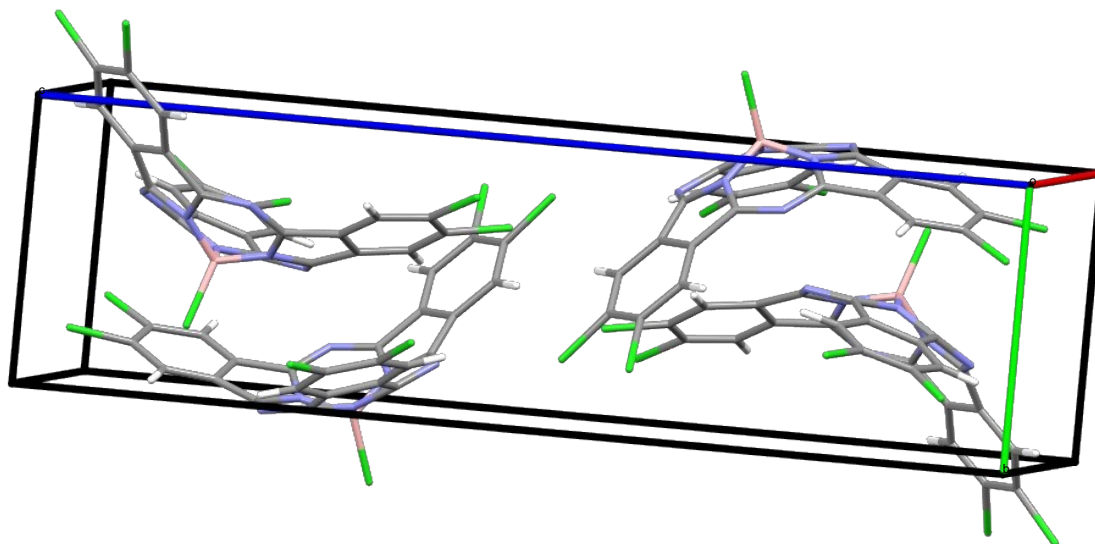

Figure S6: Populated unit cell of Cl-Cl<sub>6</sub> BsubPc (Toluene:Heptane; CCDC deposit 2087092).

Table S 1. Crystal data and structure refinement for **Cl-Cl<sub>6</sub>BsubPc (Toluene:Heptane; CCDC deposit 2087092)**.

|                                   |                                                                 |                 |
|-----------------------------------|-----------------------------------------------------------------|-----------------|
| Identification code               | d19183_a                                                        |                 |
| Empirical formula                 | C <sub>24</sub> H <sub>6</sub> B Cl <sub>7</sub> N <sub>6</sub> |                 |
| Formula weight                    | 637.31                                                          |                 |
| Temperature                       | 150(2) K                                                        |                 |
| Wavelength                        | 0.71073 Å                                                       |                 |
| Crystal system                    | Monoclinic                                                      |                 |
| Space group                       | P2 <sub>1</sub> /n                                              |                 |
| Unit cell dimensions              | a = 13.0905(3) Å                                                | α = 90°.        |
|                                   | b = 7.4207(2) Å                                                 | β = 99.499(1)°. |
|                                   | c = 25.4832(6) Å                                                | γ = 90°.        |
| Volume                            | 2441.51(10) Å <sup>3</sup>                                      |                 |
| Z                                 | 4                                                               |                 |
| Density (calculated)              | 1.734 Mg/m <sup>3</sup>                                         |                 |
| Absorption coefficient            | 0.844 mm <sup>-1</sup>                                          |                 |
| F(000)                            | 1264                                                            |                 |
| Crystal size                      | 0.230 x 0.130 x 0.050 mm <sup>3</sup>                           |                 |
| Theta range for data collection   | 1.620 to 27.556°.                                               |                 |
| Index ranges                      | -8 ≤ h ≤ 17, -9 ≤ k ≤ 9, -33 ≤ l ≤ 33                           |                 |
| Reflections collected             | 29765                                                           |                 |
| Independent reflections           | 5627 [R(int) = 0.0297]                                          |                 |
| Completeness to theta = 25.242°   | 100.0 %                                                         |                 |
| Absorption correction             | Semi-empirical from equivalents                                 |                 |
| Max. and min. transmission        | 0.7456 and 0.6857                                               |                 |
| Refinement method                 | Full-matrix least-squares on F <sup>2</sup>                     |                 |
| Data / restraints / parameters    | 5627 / 0 / 343                                                  |                 |
| Goodness-of-fit on F <sup>2</sup> | 1.022                                                           |                 |
| Final R indices [I > 2σ(I)]       | R1 = 0.0291, wR2 = 0.0664                                       |                 |
| R indices (all data)              | R1 = 0.0405, wR2 = 0.0715                                       |                 |
| Extinction coefficient            | n/a                                                             |                 |
| Largest diff. peak and hole       | 0.341 and -0.358 e.Å <sup>-3</sup>                              |                 |

Table S 2. Atomic coordinates ( $\times 10^4$ ) and equivalent isotropic displacement parameters ( $\text{\AA}^2 \times 10^3$ ) for **Cl-Cl<sub>6</sub>BsubPc (Toluene:Heptane; CCDC deposit 2087092)**. U(eq) is defined as one third of the trace of the orthogonalized  $U^{ij}$  tensor.

|       | x        | y        | z       | U(eq) |
|-------|----------|----------|---------|-------|
| Cl(1) | 6127(1)  | -2521(1) | 3389(1) | 23(1) |
| Cl(2) | 3567(1)  | 7803(1)  | 4092(1) | 44(1) |
| Cl(3) | 5624(1)  | 7811(1)  | 4920(1) | 29(1) |
| Cl(4) | 12062(1) | 2783(1)  | 4100(1) | 33(1) |
| Cl(5) | 12098(1) | 1658(1)  | 2915(1) | 36(1) |
| Cl(6) | 6011(1)  | 1844(1)  | 242(1)  | 35(1) |
| Cl(7) | 3779(1)  | 2926(1)  | 436(1)  | 30(1) |
| N(1)  | 6029(1)  | 1212(2)  | 3480(1) | 17(1) |
| N(2)  | 7620(1)  | 1842(2)  | 4052(1) | 18(1) |
| N(3)  | 7598(1)  | 103(2)   | 3266(1) | 16(1) |
| N(4)  | 7737(1)  | -288(2)  | 2355(1) | 16(1) |
| N(5)  | 6086(1)  | 138(2)   | 2616(1) | 16(1) |
| N(6)  | 4659(1)  | 1918(2)  | 2773(1) | 18(1) |
| C(1)  | 5129(1)  | 2090(2)  | 3282(1) | 17(1) |
| C(2)  | 5004(1)  | 3456(2)  | 3679(1) | 18(1) |
| C(3)  | 4261(1)  | 4783(2)  | 3692(1) | 22(1) |
| C(4)  | 4449(1)  | 6078(3)  | 4088(1) | 23(1) |
| C(5)  | 5366(1)  | 6072(2)  | 4466(1) | 21(1) |
| C(6)  | 6101(1)  | 4745(2)  | 4461(1) | 20(1) |
| C(7)  | 5917(1)  | 3435(2)  | 4066(1) | 18(1) |
| C(8)  | 6591(1)  | 2046(2)  | 3912(1) | 18(1) |
| C(9)  | 8111(1)  | 969(2)   | 3704(1) | 17(1) |
| C(10) | 9179(1)  | 1119(2)  | 3618(1) | 17(1) |
| C(11) | 10055(1) | 1849(2)  | 3929(1) | 20(1) |
| C(12) | 10951(1) | 1966(2)  | 3710(1) | 21(1) |
| C(13) | 10970(1) | 1438(2)  | 3182(1) | 21(1) |
| C(14) | 10103(1) | 728(2)   | 2867(1) | 19(1) |
| C(15) | 9210(1)  | 526(2)   | 3091(1) | 17(1) |
| C(16) | 8168(1)  | -50(2)   | 2865(1) | 16(1) |
| C(17) | 6708(1)  | -48(2)   | 2239(1) | 16(1) |

|       |         |         |         |       |
|-------|---------|---------|---------|-------|
| C(18) | 6087(1) | 527(2)  | 1747(1) | 17(1) |
| C(19) | 6356(1) | 734(2)  | 1246(1) | 18(1) |
| C(20) | 5641(1) | 1501(2) | 854(1)  | 20(1) |
| C(21) | 4655(1) | 2034(2) | 952(1)  | 20(1) |
| C(22) | 4393(1) | 1893(2) | 1455(1) | 20(1) |
| C(23) | 5120(1) | 1152(2) | 1862(1) | 17(1) |
| C(24) | 5180(1) | 1023(2) | 2439(1) | 17(1) |
| B(1)  | 6464(2) | -245(3) | 3188(1) | 16(1) |

---

Table S 3. Bond lengths [ $\text{\AA}$ ] and angles [ $^\circ$ ] for **Cl-Cl<sub>6</sub>BsubPc (Toluene:Heptane; CCDC deposit 2087092)**.

---

|             |            |
|-------------|------------|
| Cl(1)-B(1)  | 1.8395(19) |
| Cl(2)-C(4)  | 1.7253(18) |
| Cl(3)-C(5)  | 1.7282(18) |
| Cl(4)-C(12) | 1.7290(17) |
| Cl(5)-C(13) | 1.7321(17) |
| Cl(6)-C(20) | 1.7262(17) |
| Cl(7)-C(21) | 1.7263(17) |
| N(1)-C(8)   | 1.368(2)   |
| N(1)-C(1)   | 1.368(2)   |
| N(1)-B(1)   | 1.479(2)   |
| N(2)-C(9)   | 1.343(2)   |
| N(2)-C(8)   | 1.344(2)   |
| N(3)-C(9)   | 1.365(2)   |
| N(3)-C(16)  | 1.366(2)   |
| N(3)-B(1)   | 1.487(2)   |
| N(4)-C(16)  | 1.340(2)   |
| N(4)-C(17)  | 1.343(2)   |
| N(5)-C(17)  | 1.365(2)   |
| N(5)-C(24)  | 1.366(2)   |
| N(5)-B(1)   | 1.487(2)   |
| N(6)-C(1)   | 1.346(2)   |
| N(6)-C(24)  | 1.351(2)   |
| C(1)-C(2)   | 1.461(2)   |
| C(2)-C(3)   | 1.388(2)   |
| C(2)-C(7)   | 1.419(2)   |
| C(3)-C(4)   | 1.385(2)   |
| C(3)-H(3A)  | 0.9500     |
| C(4)-C(5)   | 1.410(3)   |
| C(5)-C(6)   | 1.378(3)   |
| C(6)-C(7)   | 1.392(2)   |
| C(6)-H(6A)  | 0.9500     |
| C(7)-C(8)   | 1.453(2)   |
| C(9)-C(10)  | 1.455(2)   |

|                  |            |
|------------------|------------|
| C(10)-C(11)      | 1.392(2)   |
| C(10)-C(15)      | 1.421(2)   |
| C(11)-C(12)      | 1.382(2)   |
| C(11)-H(11A)     | 0.9500     |
| C(12)-C(13)      | 1.407(2)   |
| C(13)-C(14)      | 1.382(2)   |
| C(14)-C(15)      | 1.391(2)   |
| C(14)-H(14A)     | 0.9500     |
| C(15)-C(16)      | 1.454(2)   |
| C(17)-C(18)      | 1.442(2)   |
| C(18)-C(19)      | 1.387(2)   |
| C(18)-C(23)      | 1.424(2)   |
| C(19)-C(20)      | 1.374(2)   |
| C(19)-H(19A)     | 0.9500     |
| C(20)-C(21)      | 1.411(2)   |
| C(21)-C(22)      | 1.386(2)   |
| C(22)-C(23)      | 1.399(2)   |
| C(22)-H(22A)     | 0.9500     |
| C(23)-C(24)      | 1.463(2)   |
|                  |            |
| C(8)-N(1)-C(1)   | 113.46(14) |
| C(8)-N(1)-B(1)   | 122.38(14) |
| C(1)-N(1)-B(1)   | 122.84(14) |
| C(9)-N(2)-C(8)   | 116.56(14) |
| C(9)-N(3)-C(16)  | 113.30(14) |
| C(9)-N(3)-B(1)   | 122.41(14) |
| C(16)-N(3)-B(1)  | 122.84(14) |
| C(16)-N(4)-C(17) | 116.22(14) |
| C(17)-N(5)-C(24) | 113.65(13) |
| C(17)-N(5)-B(1)  | 122.01(14) |
| C(24)-N(5)-B(1)  | 123.17(14) |
| C(1)-N(6)-C(24)  | 117.10(14) |
| N(6)-C(1)-N(1)   | 122.66(15) |
| N(6)-C(1)-C(2)   | 130.32(15) |
| N(1)-C(1)-C(2)   | 105.26(14) |
| C(3)-C(2)-C(7)   | 120.26(16) |

|                    |            |
|--------------------|------------|
| C(3)-C(2)-C(1)     | 131.96(16) |
| C(7)-C(2)-C(1)     | 107.20(14) |
| C(4)-C(3)-C(2)     | 117.96(16) |
| C(4)-C(3)-H(3A)    | 121.0      |
| C(2)-C(3)-H(3A)    | 121.0      |
| C(3)-C(4)-C(5)     | 121.59(17) |
| C(3)-C(4)-Cl(2)    | 118.73(14) |
| C(5)-C(4)-Cl(2)    | 119.59(14) |
| C(6)-C(5)-C(4)     | 120.93(16) |
| C(6)-C(5)-Cl(3)    | 118.66(14) |
| C(4)-C(5)-Cl(3)    | 120.30(14) |
| C(5)-C(6)-C(7)     | 117.84(16) |
| C(5)-C(6)-H(6A)    | 121.1      |
| C(7)-C(6)-H(6A)    | 121.1      |
| C(6)-C(7)-C(2)     | 121.39(16) |
| C(6)-C(7)-C(8)     | 130.57(16) |
| C(2)-C(7)-C(8)     | 107.47(14) |
| N(2)-C(8)-N(1)     | 122.99(15) |
| N(2)-C(8)-C(7)     | 129.48(15) |
| N(1)-C(8)-C(7)     | 105.57(14) |
| N(2)-C(9)-N(3)     | 122.88(15) |
| N(2)-C(9)-C(10)    | 129.66(15) |
| N(3)-C(9)-C(10)    | 105.50(13) |
| C(11)-C(10)-C(15)  | 120.65(15) |
| C(11)-C(10)-C(9)   | 131.75(15) |
| C(15)-C(10)-C(9)   | 107.29(14) |
| C(12)-C(11)-C(10)  | 117.97(15) |
| C(12)-C(11)-H(11A) | 121.0      |
| C(10)-C(11)-H(11A) | 121.0      |
| C(11)-C(12)-C(13)  | 121.28(16) |
| C(11)-C(12)-Cl(4)  | 118.68(13) |
| C(13)-C(12)-Cl(4)  | 120.05(13) |
| C(14)-C(13)-C(12)  | 121.29(16) |
| C(14)-C(13)-Cl(5)  | 118.69(13) |
| C(12)-C(13)-Cl(5)  | 120.03(13) |
| C(13)-C(14)-C(15)  | 117.94(15) |

|                    |            |
|--------------------|------------|
| C(13)-C(14)-H(14A) | 121.0      |
| C(15)-C(14)-H(14A) | 121.0      |
| C(14)-C(15)-C(10)  | 120.76(15) |
| C(14)-C(15)-C(16)  | 131.76(15) |
| C(10)-C(15)-C(16)  | 107.11(14) |
| N(4)-C(16)-N(3)    | 122.81(15) |
| N(4)-C(16)-C(15)   | 129.77(15) |
| N(3)-C(16)-C(15)   | 105.78(14) |
| N(4)-C(17)-N(5)    | 123.49(14) |
| N(4)-C(17)-C(18)   | 129.14(15) |
| N(5)-C(17)-C(18)   | 105.49(14) |
| C(19)-C(18)-C(23)  | 121.52(15) |
| C(19)-C(18)-C(17)  | 129.85(15) |
| C(23)-C(18)-C(17)  | 108.07(14) |
| C(20)-C(19)-C(18)  | 117.93(16) |
| C(20)-C(19)-H(19A) | 121.0      |
| C(18)-C(19)-H(19A) | 121.0      |
| C(19)-C(20)-C(21)  | 121.44(15) |
| C(19)-C(20)-Cl(6)  | 117.32(13) |
| C(21)-C(20)-Cl(6)  | 121.22(13) |
| C(22)-C(21)-C(20)  | 121.01(15) |
| C(22)-C(21)-Cl(7)  | 119.87(14) |
| C(20)-C(21)-Cl(7)  | 119.10(13) |
| C(21)-C(22)-C(23)  | 118.25(16) |
| C(21)-C(22)-H(22A) | 120.9      |
| C(23)-C(22)-H(22A) | 120.9      |
| C(22)-C(23)-C(18)  | 119.70(15) |
| C(22)-C(23)-C(24)  | 133.44(16) |
| C(18)-C(23)-C(24)  | 106.45(14) |
| N(6)-C(24)-N(5)    | 121.93(14) |
| N(6)-C(24)-C(23)   | 130.77(15) |
| N(5)-C(24)-C(23)   | 105.32(14) |
| N(1)-B(1)-N(5)     | 105.02(14) |
| N(1)-B(1)-N(3)     | 105.33(14) |
| N(5)-B(1)-N(3)     | 105.13(13) |
| N(1)-B(1)-Cl(1)    | 113.68(12) |



N(5)-B(1)-Cl(1)            113.07(12)

N(3)-B(1)-Cl(1)            113.74(12)

---

Symmetry transformations used to generate equivalent atoms:

Table S 4. Anisotropic displacement parameters ( $\text{\AA}^2 \times 10^3$ ) for **Cl-Cl<sub>6</sub>BsubPc (Toluene:Heptane; CCDC deposit 2087092)**. The anisotropic displacement factor exponent takes the form:  $-2\pi^2 [h^2 a^{*2} U^{11} + \dots + 2 h k a^* b^* U^{12}]$ .

|       | U <sup>11</sup> | U <sup>22</sup> | U <sup>33</sup> | U <sup>23</sup> | U <sup>13</sup> | U <sup>12</sup> |
|-------|-----------------|-----------------|-----------------|-----------------|-----------------|-----------------|
| Cl(1) | 29(1)           | 17(1)           | 23(1)           | 4(1)            | 8(1)            | -3(1)           |
| Cl(2) | 27(1)           | 44(1)           | 58(1)           | -23(1)          | 3(1)            | 13(1)           |
| Cl(3) | 33(1)           | 26(1)           | 29(1)           | -10(1)          | 10(1)           | -2(1)           |
| Cl(4) | 19(1)           | 52(1)           | 26(1)           | -8(1)           | -1(1)           | -8(1)           |
| Cl(5) | 22(1)           | 58(1)           | 31(1)           | -10(1)          | 10(1)           | -10(1)          |
| Cl(6) | 31(1)           | 60(1)           | 15(1)           | 10(1)           | 4(1)            | 6(1)            |
| Cl(7) | 24(1)           | 42(1)           | 20(1)           | 5(1)            | -5(1)           | 5(1)            |
| N(1)  | 18(1)           | 18(1)           | 15(1)           | 1(1)            | 4(1)            | -1(1)           |
| N(2)  | 21(1)           | 20(1)           | 13(1)           | 2(1)            | 3(1)            | 1(1)            |
| N(3)  | 19(1)           | 16(1)           | 13(1)           | 2(1)            | 2(1)            | 1(1)            |
| N(4)  | 19(1)           | 14(1)           | 15(1)           | 0(1)            | 2(1)            | 0(1)            |
| N(5)  | 17(1)           | 15(1)           | 15(1)           | 0(1)            | 3(1)            | -2(1)           |
| N(6)  | 16(1)           | 20(1)           | 18(1)           | 0(1)            | 5(1)            | -4(1)           |
| C(1)  | 16(1)           | 17(1)           | 19(1)           | 2(1)            | 6(1)            | -3(1)           |
| C(2)  | 18(1)           | 20(1)           | 18(1)           | 1(1)            | 8(1)            | -4(1)           |
| C(3)  | 16(1)           | 26(1)           | 25(1)           | -1(1)           | 7(1)            | -3(1)           |
| C(4)  | 21(1)           | 24(1)           | 28(1)           | -2(1)           | 11(1)           | 2(1)            |
| C(5)  | 26(1)           | 21(1)           | 19(1)           | -3(1)           | 11(1)           | -5(1)           |
| C(6)  | 22(1)           | 22(1)           | 16(1)           | 1(1)            | 6(1)            | -4(1)           |
| C(7)  | 20(1)           | 18(1)           | 16(1)           | 2(1)            | 8(1)            | -2(1)           |
| C(8)  | 21(1)           | 19(1)           | 13(1)           | 2(1)            | 4(1)            | -2(1)           |
| C(9)  | 21(1)           | 16(1)           | 13(1)           | 3(1)            | 1(1)            | 1(1)            |
| C(10) | 19(1)           | 16(1)           | 15(1)           | 3(1)            | 1(1)            | 3(1)            |
| C(11) | 21(1)           | 22(1)           | 15(1)           | 0(1)            | 0(1)            | 2(1)            |
| C(12) | 18(1)           | 24(1)           | 21(1)           | -1(1)           | -2(1)           | -1(1)           |
| C(13) | 18(1)           | 23(1)           | 23(1)           | 1(1)            | 6(1)            | 0(1)            |
| C(14) | 21(1)           | 20(1)           | 17(1)           | 1(1)            | 2(1)            | 4(1)            |
| C(15) | 18(1)           | 16(1)           | 16(1)           | 2(1)            | 1(1)            | 3(1)            |
| C(16) | 18(1)           | 13(1)           | 17(1)           | 2(1)            | 4(1)            | 2(1)            |
| C(17) | 21(1)           | 12(1)           | 15(1)           | -1(1)           | 4(1)            | -2(1)           |

|       |       |       |       |       |       |       |
|-------|-------|-------|-------|-------|-------|-------|
| C(18) | 18(1) | 15(1) | 17(1) | -2(1) | 1(1)  | -4(1) |
| C(19) | 18(1) | 20(1) | 16(1) | -2(1) | 2(1)  | -3(1) |
| C(20) | 23(1) | 25(1) | 13(1) | 0(1)  | 1(1)  | -4(1) |
| C(21) | 20(1) | 21(1) | 18(1) | 1(1)  | -4(1) | -2(1) |
| C(22) | 17(1) | 21(1) | 20(1) | -2(1) | 1(1)  | -2(1) |
| C(23) | 19(1) | 17(1) | 16(1) | -2(1) | 2(1)  | -4(1) |
| C(24) | 15(1) | 16(1) | 18(1) | 0(1)  | 2(1)  | -3(1) |
| B(1)  | 20(1) | 15(1) | 14(1) | 1(1)  | 3(1)  | -2(1) |

---

Table S 5. Hydrogen coordinates ( $\times 10^4$ ) and isotropic displacement parameters ( $\text{\AA}^2 \times 10^{-3}$ ) for **Cl-Cl<sub>6</sub>BsubPc** (**Toluene:Heptane**; **CCDC deposit 2087092**).

|        | x     | y    | z    | U(eq) |
|--------|-------|------|------|-------|
| H(3A)  | 3642  | 4802 | 3438 | 26    |
| H(6A)  | 6714  | 4725 | 4720 | 23    |
| H(11A) | 10038 | 2253 | 4281 | 24    |
| H(14A) | 10116 | 389  | 2509 | 23    |
| H(19A) | 7014  | 358  | 1176 | 22    |
| H(22A) | 3736  | 2289 | 1523 | 23    |

Table S 6. Torsion angles [°] for **Cl-Cl<sub>6</sub>BsubPc (Toluene:Heptane; CCDC deposit 2087092)**.

---

|                       |             |
|-----------------------|-------------|
| C(24)-N(6)-C(1)-N(1)  | -8.6(2)     |
| C(24)-N(6)-C(1)-C(2)  | 153.94(17)  |
| C(8)-N(1)-C(1)-N(6)   | 155.67(15)  |
| B(1)-N(1)-C(1)-N(6)   | -11.5(2)    |
| C(8)-N(1)-C(1)-C(2)   | -10.62(18)  |
| B(1)-N(1)-C(1)-C(2)   | -177.75(14) |
| N(6)-C(1)-C(2)-C(3)   | 12.9(3)     |
| N(1)-C(1)-C(2)-C(3)   | 177.74(17)  |
| N(6)-C(1)-C(2)-C(7)   | -158.17(16) |
| N(1)-C(1)-C(2)-C(7)   | 6.66(17)    |
| C(7)-C(2)-C(3)-C(4)   | 0.8(2)      |
| C(1)-C(2)-C(3)-C(4)   | -169.30(17) |
| C(2)-C(3)-C(4)-C(5)   | 0.4(3)      |
| C(2)-C(3)-C(4)-Cl(2)  | 176.82(13)  |
| C(3)-C(4)-C(5)-C(6)   | -1.4(3)     |
| Cl(2)-C(4)-C(5)-C(6)  | -177.87(13) |
| C(3)-C(4)-C(5)-Cl(3)  | 174.70(14)  |
| Cl(2)-C(4)-C(5)-Cl(3) | -1.7(2)     |
| C(4)-C(5)-C(6)-C(7)   | 1.2(2)      |
| Cl(3)-C(5)-C(6)-C(7)  | -174.97(12) |
| C(5)-C(6)-C(7)-C(2)   | 0.0(2)      |
| C(5)-C(6)-C(7)-C(8)   | 170.19(16)  |
| C(3)-C(2)-C(7)-C(6)   | -1.0(2)     |
| C(1)-C(2)-C(7)-C(6)   | 171.31(14)  |
| C(3)-C(2)-C(7)-C(8)   | -173.24(15) |
| C(1)-C(2)-C(7)-C(8)   | -0.92(18)   |
| C(9)-N(2)-C(8)-N(1)   | 8.9(2)      |
| C(9)-N(2)-C(8)-C(7)   | -152.76(17) |
| C(1)-N(1)-C(8)-N(2)   | -155.33(15) |
| B(1)-N(1)-C(8)-N(2)   | 11.9(2)     |
| C(1)-N(1)-C(8)-C(7)   | 10.08(18)   |
| B(1)-N(1)-C(8)-C(7)   | 177.28(14)  |
| C(6)-C(7)-C(8)-N(2)   | -12.3(3)    |

|                         |             |
|-------------------------|-------------|
| C(2)-C(7)-C(8)-N(2)     | 158.93(16)  |
| C(6)-C(7)-C(8)-N(1)     | -176.44(16) |
| C(2)-C(7)-C(8)-N(1)     | -5.18(18)   |
| C(8)-N(2)-C(9)-N(3)     | -8.9(2)     |
| C(8)-N(2)-C(9)-C(10)    | 152.79(17)  |
| C(16)-N(3)-C(9)-N(2)    | 154.83(15)  |
| B(1)-N(3)-C(9)-N(2)     | -11.8(2)    |
| C(16)-N(3)-C(9)-C(10)   | -10.64(18)  |
| B(1)-N(3)-C(9)-C(10)    | -177.26(14) |
| N(2)-C(9)-C(10)-C(11)   | 16.8(3)     |
| N(3)-C(9)-C(10)-C(11)   | -179.08(17) |
| N(2)-C(9)-C(10)-C(15)   | -156.62(17) |
| N(3)-C(9)-C(10)-C(15)   | 7.48(18)    |
| C(15)-C(10)-C(11)-C(12) | -0.3(2)     |
| C(9)-C(10)-C(11)-C(12)  | -173.05(17) |
| C(10)-C(11)-C(12)-C(13) | 2.7(3)      |
| C(10)-C(11)-C(12)-Cl(4) | -177.42(13) |
| C(11)-C(12)-C(13)-C(14) | -2.1(3)     |
| Cl(4)-C(12)-C(13)-C(14) | 177.99(14)  |
| C(11)-C(12)-C(13)-Cl(5) | 178.34(14)  |
| Cl(4)-C(12)-C(13)-Cl(5) | -1.6(2)     |
| C(12)-C(13)-C(14)-C(15) | -0.9(3)     |
| Cl(5)-C(13)-C(14)-C(15) | 178.67(13)  |
| C(13)-C(14)-C(15)-C(10) | 3.2(2)      |
| C(13)-C(14)-C(15)-C(16) | 175.30(17)  |
| C(11)-C(10)-C(15)-C(14) | -2.6(3)     |
| C(9)-C(10)-C(15)-C(14)  | 171.67(15)  |
| C(11)-C(10)-C(15)-C(16) | -176.48(15) |
| C(9)-C(10)-C(15)-C(16)  | -2.17(18)   |
| C(17)-N(4)-C(16)-N(3)   | 11.6(2)     |
| C(17)-N(4)-C(16)-C(15)  | -151.65(17) |
| C(9)-N(3)-C(16)-N(4)    | -157.39(15) |
| B(1)-N(3)-C(16)-N(4)    | 9.2(2)      |
| C(9)-N(3)-C(16)-C(15)   | 9.32(18)    |
| B(1)-N(3)-C(16)-C(15)   | 175.88(15)  |
| C(14)-C(15)-C(16)-N(4)  | -11.4(3)    |

|                         |             |
|-------------------------|-------------|
| C(10)-C(15)-C(16)-N(4)  | 161.47(17)  |
| C(14)-C(15)-C(16)-N(3)  | -176.85(18) |
| C(10)-C(15)-C(16)-N(3)  | -3.97(18)   |
| C(16)-N(4)-C(17)-N(5)   | -10.5(2)    |
| C(16)-N(4)-C(17)-C(18)  | 151.60(17)  |
| C(24)-N(5)-C(17)-N(4)   | 156.43(15)  |
| B(1)-N(5)-C(17)-N(4)    | -11.6(2)    |
| C(24)-N(5)-C(17)-C(18)  | -9.21(18)   |
| B(1)-N(5)-C(17)-C(18)   | -177.20(14) |
| N(4)-C(17)-C(18)-C(19)  | 10.4(3)     |
| N(5)-C(17)-C(18)-C(19)  | 174.90(17)  |
| N(4)-C(17)-C(18)-C(23)  | -160.90(16) |
| N(5)-C(17)-C(18)-C(23)  | 3.64(18)    |
| C(23)-C(18)-C(19)-C(20) | -2.5(2)     |
| C(17)-C(18)-C(19)-C(20) | -172.79(17) |
| C(18)-C(19)-C(20)-C(21) | -1.2(3)     |
| C(18)-C(19)-C(20)-Cl(6) | 177.08(13)  |
| C(19)-C(20)-C(21)-C(22) | 3.6(3)      |
| Cl(6)-C(20)-C(21)-C(22) | -174.62(14) |
| C(19)-C(20)-C(21)-Cl(7) | -178.03(14) |
| Cl(6)-C(20)-C(21)-Cl(7) | 3.8(2)      |
| C(20)-C(21)-C(22)-C(23) | -2.1(3)     |
| Cl(7)-C(21)-C(22)-C(23) | 179.56(13)  |
| C(21)-C(22)-C(23)-C(18) | -1.6(2)     |
| C(21)-C(22)-C(23)-C(24) | 169.95(17)  |
| C(19)-C(18)-C(23)-C(22) | 4.0(2)      |
| C(17)-C(18)-C(23)-C(22) | 176.14(15)  |
| C(19)-C(18)-C(23)-C(24) | -169.60(15) |
| C(17)-C(18)-C(23)-C(24) | 2.53(18)    |
| C(1)-N(6)-C(24)-N(5)    | 7.8(2)      |
| C(1)-N(6)-C(24)-C(23)   | -153.73(17) |
| C(17)-N(5)-C(24)-N(6)   | -154.85(15) |
| B(1)-N(5)-C(24)-N(6)    | 13.0(2)     |
| C(17)-N(5)-C(24)-C(23)  | 10.76(18)   |
| B(1)-N(5)-C(24)-C(23)   | 178.59(14)  |
| C(22)-C(23)-C(24)-N(6)  | -16.2(3)    |

|                        |             |
|------------------------|-------------|
| C(18)-C(23)-C(24)-N(6) | 156.10(17)  |
| C(22)-C(23)-C(24)-N(5) | 179.92(18)  |
| C(18)-C(23)-C(24)-N(5) | -7.73(18)   |
| C(8)-N(1)-B(1)-N(5)    | -138.63(15) |
| C(1)-N(1)-B(1)-N(5)    | 27.4(2)     |
| C(8)-N(1)-B(1)-N(3)    | -27.9(2)    |
| C(1)-N(1)-B(1)-N(3)    | 138.09(15)  |
| C(8)-N(1)-B(1)-Cl(1)   | 97.26(16)   |
| C(1)-N(1)-B(1)-Cl(1)   | -96.74(16)  |
| C(17)-N(5)-B(1)-N(1)   | 138.60(15)  |
| C(24)-N(5)-B(1)-N(1)   | -28.2(2)    |
| C(17)-N(5)-B(1)-N(3)   | 27.7(2)     |
| C(24)-N(5)-B(1)-N(3)   | -139.09(15) |
| C(17)-N(5)-B(1)-Cl(1)  | -96.91(16)  |
| C(24)-N(5)-B(1)-Cl(1)  | 96.26(17)   |
| C(9)-N(3)-B(1)-N(1)    | 27.9(2)     |
| C(16)-N(3)-B(1)-N(1)   | -137.42(15) |
| C(9)-N(3)-B(1)-N(5)    | 138.57(15)  |
| C(16)-N(3)-B(1)-N(5)   | -26.8(2)    |
| C(9)-N(3)-B(1)-Cl(1)   | -97.20(17)  |
| C(16)-N(3)-B(1)-Cl(1)  | 97.44(16)   |

---

Symmetry transformations used to generate equivalent atoms:



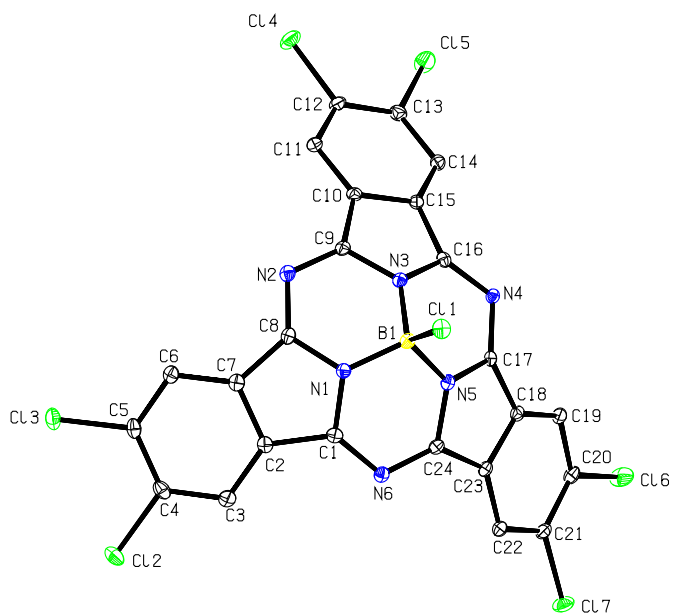

Figure S7: Anisotropic displacement ellipsoid of Cl-Cl<sub>6</sub>BsubPc (Chlorobenzene:Heptane; CCDC deposit 2087100).

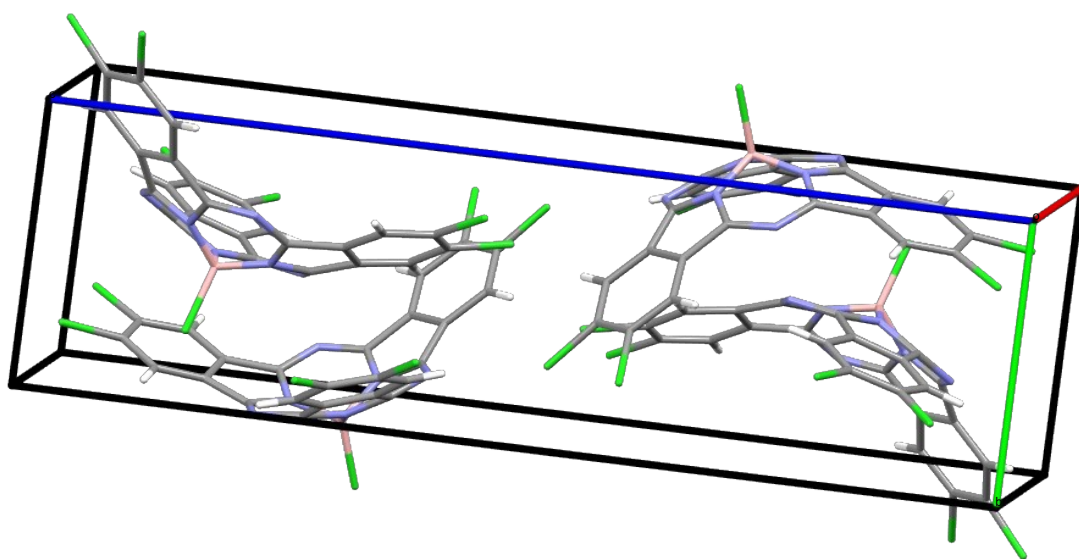

Figure S8: Populated unit cell of Cl-Cl<sub>6</sub>BsubPc (Chlorobenzene:Heptane; CCDC deposit 2087100).



Table S 7. Crystal data and structure refinement for **Cl-Cl<sub>6</sub>BsubPc (Chlorobenzene:Heptane; CCDC deposit 2087100)**.

|                                   |                                                                 |                 |
|-----------------------------------|-----------------------------------------------------------------|-----------------|
| Identification code               | d19138_a                                                        |                 |
| Empirical formula                 | C <sub>24</sub> H <sub>6</sub> B Cl <sub>7</sub> N <sub>6</sub> |                 |
| Formula weight                    | 637.31                                                          |                 |
| Temperature                       | 150(2) K                                                        |                 |
| Wavelength                        | 0.71073 Å                                                       |                 |
| Crystal system                    | Monoclinic                                                      |                 |
| Space group                       | P2 <sub>1</sub> /n                                              |                 |
| Unit cell dimensions              | a = 13.0845(8) Å                                                | α = 90°.        |
|                                   | b = 7.4155(4) Å                                                 | β = 99.476(2)°. |
|                                   | c = 25.4585(16) Å                                               | γ = 90°.        |
| Volume                            | 2436.5(3) Å <sup>3</sup>                                        |                 |
| Z                                 | 4                                                               |                 |
| Density (calculated)              | 1.737 Mg/m <sup>3</sup>                                         |                 |
| Absorption coefficient            | 0.845 mm <sup>-1</sup>                                          |                 |
| F(000)                            | 1264                                                            |                 |
| Crystal size                      | 0.240 x 0.070 x 0.020 mm <sup>3</sup>                           |                 |
| Theta range for data collection   | 1.622 to 27.516°.                                               |                 |
| Index ranges                      | -16 ≤ h ≤ 17, -9 ≤ k ≤ 9, -33 ≤ l ≤ 33                          |                 |
| Reflections collected             | 34990                                                           |                 |
| Independent reflections           | 5610 [R(int) = 0.0647]                                          |                 |
| Completeness to theta = 25.242°   | 100.0 %                                                         |                 |
| Absorption correction             | Semi-empirical from equivalents                                 |                 |
| Max. and min. transmission        | 0.7456 and 0.6945                                               |                 |
| Refinement method                 | Full-matrix least-squares on F <sup>2</sup>                     |                 |
| Data / restraints / parameters    | 5610 / 0 / 343                                                  |                 |
| Goodness-of-fit on F <sup>2</sup> | 1.007                                                           |                 |
| Final R indices [I > 2σ(I)]       | R1 = 0.0370, wR2 = 0.0707                                       |                 |
| R indices (all data)              | R1 = 0.0688, wR2 = 0.0811                                       |                 |
| Extinction coefficient            | n/a                                                             |                 |
| Largest diff. peak and hole       | 0.342 and -0.333 e.Å <sup>-3</sup>                              |                 |

Table S 8. Atomic coordinates ( $\times 10^4$ ) and equivalent isotropic displacement parameters ( $\text{\AA}^2 \times 10^3$ ) for **Cl-Cl<sub>6</sub>BsubPc (Chlorobenzene:Heptane; CCDC deposit 2087100)**. U(eq) is defined as one third of the trace of the orthogonalized  $U^{ij}$  tensor.

|       | x        | y        | z       | U(eq) |
|-------|----------|----------|---------|-------|
| Cl(1) | 6126(1)  | -2521(1) | 3389(1) | 22(1) |
| Cl(2) | 3568(1)  | 7804(1)  | 4092(1) | 43(1) |
| Cl(3) | 5625(1)  | 7812(1)  | 4920(1) | 28(1) |
| Cl(4) | 12062(1) | 2783(1)  | 4100(1) | 32(1) |
| Cl(5) | 12098(1) | 1657(1)  | 2915(1) | 36(1) |
| Cl(6) | 6010(1)  | 1843(1)  | 243(1)  | 35(1) |
| Cl(7) | 3779(1)  | 2926(1)  | 436(1)  | 29(1) |
| N(1)  | 6030(1)  | 1210(2)  | 3480(1) | 15(1) |
| N(2)  | 7620(1)  | 1841(3)  | 4051(1) | 18(1) |
| N(3)  | 7598(1)  | 101(2)   | 3267(1) | 15(1) |
| N(4)  | 7738(1)  | -289(2)  | 2354(1) | 15(1) |
| N(5)  | 6091(1)  | 134(2)   | 2617(1) | 15(1) |
| N(6)  | 4658(1)  | 1916(2)  | 2773(1) | 17(1) |
| C(1)  | 5126(2)  | 2089(3)  | 3282(1) | 16(1) |
| C(2)  | 5001(2)  | 3456(3)  | 3679(1) | 16(1) |
| C(3)  | 4259(2)  | 4785(3)  | 3693(1) | 20(1) |
| C(4)  | 4447(2)  | 6075(3)  | 4089(1) | 22(1) |
| C(5)  | 5365(2)  | 6071(3)  | 4466(1) | 20(1) |
| C(6)  | 6100(2)  | 4743(3)  | 4460(1) | 19(1) |
| C(7)  | 5918(2)  | 3437(3)  | 4067(1) | 17(1) |
| C(8)  | 6589(2)  | 2042(3)  | 3912(1) | 16(1) |
| C(9)  | 8108(2)  | 973(3)   | 3705(1) | 16(1) |
| C(10) | 9176(2)  | 1119(3)  | 3617(1) | 16(1) |
| C(11) | 10054(2) | 1846(3)  | 3930(1) | 18(1) |
| C(12) | 10950(2) | 1968(3)  | 3710(1) | 20(1) |
| C(13) | 10971(2) | 1439(3)  | 3183(1) | 21(1) |
| C(14) | 10102(2) | 732(3)   | 2867(1) | 18(1) |
| C(15) | 9212(2)  | 527(3)   | 3091(1) | 16(1) |
| C(16) | 8169(2)  | -50(3)   | 2864(1) | 16(1) |
| C(17) | 6703(2)  | -47(3)   | 2240(1) | 14(1) |

|       |         |         |         |       |
|-------|---------|---------|---------|-------|
| C(18) | 6082(2) | 527(3)  | 1745(1) | 16(1) |
| C(19) | 6357(2) | 733(3)  | 1247(1) | 17(1) |
| C(20) | 5638(2) | 1503(3) | 855(1)  | 20(1) |
| C(21) | 4656(2) | 2031(3) | 954(1)  | 19(1) |
| C(22) | 4392(2) | 1888(3) | 1456(1) | 18(1) |
| C(23) | 5120(2) | 1150(3) | 1863(1) | 16(1) |
| C(24) | 5179(2) | 1026(3) | 2440(1) | 16(1) |
| B(1)  | 6460(2) | -243(3) | 3188(1) | 16(1) |

---

Table S 9. Bond lengths [ $\text{\AA}$ ] and angles [ $^\circ$ ] for **Cl-Cl<sub>6</sub>BsubPc (Chlorobenzene:Heptane; CCDC deposit 2087100)**.

---

|             |          |
|-------------|----------|
| Cl(1)-B(1)  | 1.838(3) |
| Cl(2)-C(4)  | 1.724(2) |
| Cl(3)-C(5)  | 1.728(2) |
| Cl(4)-C(12) | 1.729(2) |
| Cl(5)-C(13) | 1.732(2) |
| Cl(6)-C(20) | 1.725(2) |
| Cl(7)-C(21) | 1.731(2) |
| N(1)-C(8)   | 1.363(3) |
| N(1)-C(1)   | 1.372(3) |
| N(1)-B(1)   | 1.473(3) |
| N(2)-C(9)   | 1.334(3) |
| N(2)-C(8)   | 1.345(3) |
| N(3)-C(9)   | 1.366(3) |
| N(3)-C(16)  | 1.369(3) |
| N(3)-B(1)   | 1.491(3) |
| N(4)-C(16)  | 1.339(3) |
| N(4)-C(17)  | 1.349(3) |
| N(5)-C(17)  | 1.355(3) |
| N(5)-C(24)  | 1.373(3) |
| N(5)-B(1)   | 1.480(3) |
| N(6)-C(1)   | 1.345(3) |
| N(6)-C(24)  | 1.346(3) |
| C(1)-C(2)   | 1.461(3) |
| C(2)-C(3)   | 1.388(3) |
| C(2)-C(7)   | 1.424(3) |
| C(3)-C(4)   | 1.381(3) |
| C(3)-H(3A)  | 0.9500   |
| C(4)-C(5)   | 1.409(3) |
| C(5)-C(6)   | 1.378(3) |
| C(6)-C(7)   | 1.384(3) |
| C(6)-H(6A)  | 0.9500   |
| C(7)-C(8)   | 1.453(3) |

|                  |            |
|------------------|------------|
| C(9)-C(10)       | 1.455(3)   |
| C(10)-C(11)      | 1.394(3)   |
| C(10)-C(15)      | 1.418(3)   |
| C(11)-C(12)      | 1.384(3)   |
| C(11)-H(11A)     | 0.9500     |
| C(12)-C(13)      | 1.402(3)   |
| C(13)-C(14)      | 1.384(3)   |
| C(14)-C(15)      | 1.386(3)   |
| C(14)-H(14A)     | 0.9500     |
| C(15)-C(16)      | 1.455(3)   |
| C(17)-C(18)      | 1.445(3)   |
| C(18)-C(19)      | 1.382(3)   |
| C(18)-C(23)      | 1.419(3)   |
| C(19)-C(20)      | 1.379(3)   |
| C(19)-H(19A)     | 0.9500     |
| C(20)-C(21)      | 1.406(3)   |
| C(21)-C(22)      | 1.382(3)   |
| C(22)-C(23)      | 1.398(3)   |
| C(22)-H(22A)     | 0.9500     |
| C(23)-C(24)      | 1.460(3)   |
|                  |            |
| C(8)-N(1)-C(1)   | 113.41(19) |
| C(8)-N(1)-B(1)   | 122.68(19) |
| C(1)-N(1)-B(1)   | 122.60(19) |
| C(9)-N(2)-C(8)   | 116.66(19) |
| C(9)-N(3)-C(16)  | 113.40(19) |
| C(9)-N(3)-B(1)   | 122.3(2)   |
| C(16)-N(3)-B(1)  | 122.79(19) |
| C(16)-N(4)-C(17) | 116.13(19) |
| C(17)-N(5)-C(24) | 113.38(19) |
| C(17)-N(5)-B(1)  | 122.80(19) |
| C(24)-N(5)-B(1)  | 122.65(19) |
| C(1)-N(6)-C(24)  | 117.11(19) |
| N(6)-C(1)-N(1)   | 122.6(2)   |
| N(6)-C(1)-C(2)   | 130.4(2)   |
| N(1)-C(1)-C(2)   | 105.25(18) |

|                    |            |
|--------------------|------------|
| C(3)-C(2)-C(7)     | 120.1(2)   |
| C(3)-C(2)-C(1)     | 132.1(2)   |
| C(7)-C(2)-C(1)     | 107.21(19) |
| C(4)-C(3)-C(2)     | 118.0(2)   |
| C(4)-C(3)-H(3A)    | 121.0      |
| C(2)-C(3)-H(3A)    | 121.0      |
| C(3)-C(4)-C(5)     | 121.7(2)   |
| C(3)-C(4)-Cl(2)    | 118.68(19) |
| C(5)-C(4)-Cl(2)    | 119.51(19) |
| C(6)-C(5)-C(4)     | 120.8(2)   |
| C(6)-C(5)-Cl(3)    | 118.71(18) |
| C(4)-C(5)-Cl(3)    | 120.39(18) |
| C(5)-C(6)-C(7)     | 118.1(2)   |
| C(5)-C(6)-H(6A)    | 121.0      |
| C(7)-C(6)-H(6A)    | 121.0      |
| C(6)-C(7)-C(2)     | 121.3(2)   |
| C(6)-C(7)-C(8)     | 130.9(2)   |
| C(2)-C(7)-C(8)     | 107.2(2)   |
| N(2)-C(8)-N(1)     | 122.9(2)   |
| N(2)-C(8)-C(7)     | 129.2(2)   |
| N(1)-C(8)-C(7)     | 105.90(18) |
| N(2)-C(9)-N(3)     | 123.0(2)   |
| N(2)-C(9)-C(10)    | 130.0(2)   |
| N(3)-C(9)-C(10)    | 105.1(2)   |
| C(11)-C(10)-C(15)  | 120.5(2)   |
| C(11)-C(10)-C(9)   | 131.5(2)   |
| C(15)-C(10)-C(9)   | 107.77(19) |
| C(12)-C(11)-C(10)  | 117.9(2)   |
| C(12)-C(11)-H(11A) | 121.1      |
| C(10)-C(11)-H(11A) | 121.1      |
| C(11)-C(12)-C(13)  | 121.4(2)   |
| C(11)-C(12)-Cl(4)  | 118.61(18) |
| C(13)-C(12)-Cl(4)  | 119.99(18) |
| C(14)-C(13)-C(12)  | 121.2(2)   |
| C(14)-C(13)-Cl(5)  | 118.60(19) |
| C(12)-C(13)-Cl(5)  | 120.24(17) |



|                    |            |
|--------------------|------------|
| C(13)-C(14)-C(15)  | 118.0(2)   |
| C(13)-C(14)-H(14A) | 121.0      |
| C(15)-C(14)-H(14A) | 121.0      |
| C(14)-C(15)-C(10)  | 121.0(2)   |
| C(14)-C(15)-C(16)  | 131.7(2)   |
| C(10)-C(15)-C(16)  | 106.9(2)   |
| N(4)-C(16)-N(3)    | 122.8(2)   |
| N(4)-C(16)-C(15)   | 129.9(2)   |
| N(3)-C(16)-C(15)   | 105.73(19) |
| N(4)-C(17)-N(5)    | 123.28(19) |
| N(4)-C(17)-C(18)   | 128.9(2)   |
| N(5)-C(17)-C(18)   | 105.99(19) |
| C(19)-C(18)-C(23)  | 122.1(2)   |
| C(19)-C(18)-C(17)  | 129.6(2)   |
| C(23)-C(18)-C(17)  | 107.6(2)   |
| C(20)-C(19)-C(18)  | 117.5(2)   |
| C(20)-C(19)-H(19A) | 121.3      |
| C(18)-C(19)-H(19A) | 121.3      |
| C(19)-C(20)-C(21)  | 121.3(2)   |
| C(19)-C(20)-Cl(6)  | 117.08(18) |
| C(21)-C(20)-Cl(6)  | 121.61(18) |
| C(22)-C(21)-C(20)  | 121.4(2)   |
| C(22)-C(21)-Cl(7)  | 119.88(18) |
| C(20)-C(21)-Cl(7)  | 118.75(18) |
| C(21)-C(22)-C(23)  | 118.2(2)   |
| C(21)-C(22)-H(22A) | 120.9      |
| C(23)-C(22)-H(22A) | 120.9      |
| C(22)-C(23)-C(18)  | 119.4(2)   |
| C(22)-C(23)-C(24)  | 133.4(2)   |
| C(18)-C(23)-C(24)  | 106.84(19) |
| N(6)-C(24)-N(5)    | 122.1(2)   |
| N(6)-C(24)-C(23)   | 130.8(2)   |
| N(5)-C(24)-C(23)   | 105.14(19) |
| N(1)-B(1)-N(5)     | 105.54(19) |
| N(1)-B(1)-N(3)     | 105.21(19) |
| N(5)-B(1)-N(3)     | 104.90(19) |

|                 |            |
|-----------------|------------|
| N(1)-B(1)-Cl(1) | 113.78(17) |
| N(5)-B(1)-Cl(1) | 113.13(16) |
| N(3)-B(1)-Cl(1) | 113.44(16) |

---

Symmetry transformations used to generate equivalent atoms:

Table S 10. Anisotropic displacement parameters ( $\text{\AA}^2 \times 10^3$ ) for **Cl-Cl<sub>6</sub>BsubPc (Chlorobenzene:Heptane; CCDC deposit 2087100)**. The anisotropic displacement factor exponent takes the form:  $-2\pi^2[h^2 a^{*2}U^{11} + \dots + 2 h k a^* b^* U^{12}]$ .

|       | U <sup>11</sup> | U <sup>22</sup> | U <sup>33</sup> | U <sup>23</sup> | U <sup>13</sup> | U <sup>12</sup> |
|-------|-----------------|-----------------|-----------------|-----------------|-----------------|-----------------|
| Cl(1) | 28(1)           | 17(1)           | 23(1)           | 4(1)            | 7(1)            | -3(1)           |
| Cl(2) | 27(1)           | 44(1)           | 58(1)           | -23(1)          | 2(1)            | 13(1)           |
| Cl(3) | 32(1)           | 26(1)           | 28(1)           | -10(1)          | 10(1)           | -2(1)           |
| Cl(4) | 19(1)           | 51(1)           | 25(1)           | -9(1)           | -1(1)           | -8(1)           |
| Cl(5) | 21(1)           | 57(1)           | 31(1)           | -11(1)          | 10(1)           | -10(1)          |
| Cl(6) | 30(1)           | 59(1)           | 15(1)           | 10(1)           | 4(1)            | 6(1)            |
| Cl(7) | 24(1)           | 42(1)           | 19(1)           | 5(1)            | -5(1)           | 5(1)            |
| N(1)  | 16(1)           | 16(1)           | 14(1)           | 1(1)            | 3(1)            | 0(1)            |
| N(2)  | 21(1)           | 20(1)           | 13(1)           | 2(1)            | 4(1)            | 0(1)            |
| N(3)  | 18(1)           | 14(1)           | 13(1)           | 2(1)            | 1(1)            | 0(1)            |
| N(4)  | 17(1)           | 14(1)           | 13(1)           | 0(1)            | 2(1)            | 0(1)            |
| N(5)  | 17(1)           | 14(1)           | 14(1)           | 0(1)            | 3(1)            | -3(1)           |
| N(6)  | 15(1)           | 18(1)           | 18(1)           | -1(1)           | 4(1)            | -4(1)           |
| C(1)  | 13(1)           | 18(1)           | 19(1)           | 2(1)            | 6(1)            | -3(1)           |
| C(2)  | 16(1)           | 18(1)           | 17(1)           | 1(1)            | 8(1)            | -4(1)           |
| C(3)  | 15(1)           | 25(1)           | 22(1)           | -1(1)           | 6(1)            | -5(1)           |
| C(4)  | 20(1)           | 22(1)           | 28(1)           | -1(1)           | 12(1)           | 0(1)            |
| C(5)  | 25(1)           | 19(1)           | 18(1)           | -3(1)           | 12(1)           | -5(1)           |
| C(6)  | 20(1)           | 22(1)           | 16(1)           | 0(1)            | 7(1)            | -3(1)           |
| C(7)  | 20(1)           | 19(1)           | 15(1)           | 3(1)            | 7(1)            | -2(1)           |
| C(8)  | 21(1)           | 18(1)           | 11(1)           | 2(1)            | 4(1)            | -2(1)           |
| C(9)  | 19(1)           | 14(1)           | 13(1)           | 3(1)            | 0(1)            | 1(1)            |
| C(10) | 16(1)           | 17(1)           | 15(1)           | 3(1)            | 1(1)            | 3(1)            |
| C(11) | 19(1)           | 20(1)           | 16(1)           | 0(1)            | 0(1)            | 2(1)            |
| C(12) | 16(1)           | 23(1)           | 19(1)           | -1(1)           | -3(1)           | -1(1)           |
| C(13) | 16(1)           | 23(1)           | 24(1)           | -1(1)           | 5(1)            | 0(1)            |
| C(14) | 21(1)           | 18(1)           | 14(1)           | 1(1)            | 2(1)            | 3(1)            |
| C(15) | 18(1)           | 15(1)           | 14(1)           | 1(1)            | 1(1)            | 3(1)            |
| C(16) | 19(1)           | 12(1)           | 17(1)           | 1(1)            | 4(1)            | 1(1)            |
| C(17) | 17(1)           | 12(1)           | 14(1)           | -2(1)           | 3(1)            | -1(1)           |

|       |       |       |       |       |       |       |
|-------|-------|-------|-------|-------|-------|-------|
| C(18) | 17(1) | 14(1) | 17(1) | -2(1) | 1(1)  | -2(1) |
| C(19) | 18(1) | 19(1) | 16(1) | -2(1) | 3(1)  | -2(1) |
| C(20) | 23(1) | 24(1) | 12(1) | 1(1)  | 2(1)  | -5(1) |
| C(21) | 20(1) | 19(1) | 17(1) | -1(1) | -3(1) | -2(1) |
| C(22) | 16(1) | 17(1) | 21(1) | -4(1) | 1(1)  | -3(1) |
| C(23) | 15(1) | 14(1) | 16(1) | -1(1) | 2(1)  | -4(1) |
| C(24) | 14(1) | 16(1) | 18(1) | 0(1)  | 2(1)  | -4(1) |
| B(1)  | 18(1) | 16(1) | 14(1) | 2(1)  | 2(1)  | -2(1) |

---

Table S 11. Hydrogen coordinates ( $\times 10^4$ ) and isotropic displacement parameters ( $\text{\AA}^2 \times 10^{-3}$ ) for **Cl-Cl<sub>6</sub>BsubPc** (**Chlorobenzene:Heptane; CCDC deposit 2087100**).

|        | x     | y    | z    | U(eq) |
|--------|-------|------|------|-------|
| H(3A)  | 3640  | 4806 | 3439 | 24    |
| H(6A)  | 6713  | 4724 | 4718 | 23    |
| H(11A) | 10037 | 2244 | 4283 | 22    |
| H(14A) | 10114 | 397  | 2508 | 21    |
| H(19A) | 7016  | 358  | 1178 | 21    |
| H(22A) | 3735  | 2280 | 1523 | 22    |

Table S 12. Torsion angles [°] for Cl-Cl<sub>6</sub>BsubPc (Chlorobenzene:Heptane; CCDC deposit 2087100).

---

|                       |             |
|-----------------------|-------------|
| C(24)-N(6)-C(1)-N(1)  | -8.6(3)     |
| C(24)-N(6)-C(1)-C(2)  | 153.8(2)    |
| C(8)-N(1)-C(1)-N(6)   | 155.6(2)    |
| B(1)-N(1)-C(1)-N(6)   | -11.6(3)    |
| C(8)-N(1)-C(1)-C(2)   | -10.5(2)    |
| B(1)-N(1)-C(1)-C(2)   | -177.8(2)   |
| N(6)-C(1)-C(2)-C(3)   | 13.0(4)     |
| N(1)-C(1)-C(2)-C(3)   | 177.7(2)    |
| N(6)-C(1)-C(2)-C(7)   | -158.0(2)   |
| N(1)-C(1)-C(2)-C(7)   | 6.7(2)      |
| C(7)-C(2)-C(3)-C(4)   | 0.7(3)      |
| C(1)-C(2)-C(3)-C(4)   | -169.4(2)   |
| C(2)-C(3)-C(4)-C(5)   | 0.6(4)      |
| C(2)-C(3)-C(4)-Cl(2)  | 176.61(18)  |
| C(3)-C(4)-C(5)-C(6)   | -1.6(4)     |
| Cl(2)-C(4)-C(5)-C(6)  | -177.57(19) |
| C(3)-C(4)-C(5)-Cl(3)  | 174.51(19)  |
| Cl(2)-C(4)-C(5)-Cl(3) | -1.5(3)     |
| C(4)-C(5)-C(6)-C(7)   | 1.2(3)      |
| Cl(3)-C(5)-C(6)-C(7)  | -174.90(18) |
| C(5)-C(6)-C(7)-C(2)   | 0.0(3)      |
| C(5)-C(6)-C(7)-C(8)   | 170.3(2)    |
| C(3)-C(2)-C(7)-C(6)   | -1.0(3)     |
| C(1)-C(2)-C(7)-C(6)   | 171.3(2)    |
| C(3)-C(2)-C(7)-C(8)   | -173.3(2)   |
| C(1)-C(2)-C(7)-C(8)   | -1.0(3)     |
| C(9)-N(2)-C(8)-N(1)   | 8.8(3)      |
| C(9)-N(2)-C(8)-C(7)   | -152.7(2)   |
| C(1)-N(1)-C(8)-N(2)   | -155.2(2)   |
| B(1)-N(1)-C(8)-N(2)   | 12.0(3)     |
| C(1)-N(1)-C(8)-C(7)   | 9.9(3)      |
| B(1)-N(1)-C(8)-C(7)   | 177.2(2)    |
| C(6)-C(7)-C(8)-N(2)   | -12.5(4)    |

|                         |             |
|-------------------------|-------------|
| C(2)-C(7)-C(8)-N(2)     | 158.9(2)    |
| C(6)-C(7)-C(8)-N(1)     | -176.4(2)   |
| C(2)-C(7)-C(8)-N(1)     | -5.0(2)     |
| C(8)-N(2)-C(9)-N(3)     | -8.9(3)     |
| C(8)-N(2)-C(9)-C(10)    | 152.9(2)    |
| C(16)-N(3)-C(9)-N(2)    | 154.7(2)    |
| B(1)-N(3)-C(9)-N(2)     | -11.4(3)    |
| C(16)-N(3)-C(9)-C(10)   | -10.9(2)    |
| B(1)-N(3)-C(9)-C(10)    | -177.04(19) |
| N(2)-C(9)-C(10)-C(11)   | 17.1(4)     |
| N(3)-C(9)-C(10)-C(11)   | -178.7(2)   |
| N(2)-C(9)-C(10)-C(15)   | -156.6(2)   |
| N(3)-C(9)-C(10)-C(15)   | 7.6(2)      |
| C(15)-C(10)-C(11)-C(12) | 0.1(3)      |
| C(9)-C(10)-C(11)-C(12)  | -172.9(2)   |
| C(10)-C(11)-C(12)-C(13) | 2.2(3)      |
| C(10)-C(11)-C(12)-Cl(4) | -177.51(17) |
| C(11)-C(12)-C(13)-C(14) | -1.6(4)     |
| Cl(4)-C(12)-C(13)-C(14) | 178.02(18)  |
| C(11)-C(12)-C(13)-Cl(5) | 178.55(19)  |
| Cl(4)-C(12)-C(13)-Cl(5) | -1.8(3)     |
| C(12)-C(13)-C(14)-C(15) | -1.3(3)     |
| Cl(5)-C(13)-C(14)-C(15) | 178.55(17)  |
| C(13)-C(14)-C(15)-C(10) | 3.5(3)      |
| C(13)-C(14)-C(15)-C(16) | 175.4(2)    |
| C(11)-C(10)-C(15)-C(14) | -3.0(3)     |
| C(9)-C(10)-C(15)-C(14)  | 171.5(2)    |
| C(11)-C(10)-C(15)-C(16) | -176.7(2)   |
| C(9)-C(10)-C(15)-C(16)  | -2.2(2)     |
| C(17)-N(4)-C(16)-N(3)   | 11.7(3)     |
| C(17)-N(4)-C(16)-C(15)  | -151.6(2)   |
| C(9)-N(3)-C(16)-N(4)    | -157.2(2)   |
| B(1)-N(3)-C(16)-N(4)    | 8.9(3)      |
| C(9)-N(3)-C(16)-C(15)   | 9.6(2)      |
| B(1)-N(3)-C(16)-C(15)   | 175.68(19)  |
| C(14)-C(15)-C(16)-N(4)  | -11.3(4)    |

|                         |             |
|-------------------------|-------------|
| C(10)-C(15)-C(16)-N(4)  | 161.4(2)    |
| C(14)-C(15)-C(16)-N(3)  | -176.8(2)   |
| C(10)-C(15)-C(16)-N(3)  | -4.1(2)     |
| C(16)-N(4)-C(17)-N(5)   | -10.6(3)    |
| C(16)-N(4)-C(17)-C(18)  | 151.7(2)    |
| C(24)-N(5)-C(17)-N(4)   | 156.5(2)    |
| B(1)-N(5)-C(17)-N(4)    | -11.4(3)    |
| C(24)-N(5)-C(17)-C(18)  | -9.3(2)     |
| B(1)-N(5)-C(17)-C(18)   | -177.20(19) |
| N(4)-C(17)-C(18)-C(19)  | 10.1(4)     |
| N(5)-C(17)-C(18)-C(19)  | 174.7(2)    |
| N(4)-C(17)-C(18)-C(23)  | -160.9(2)   |
| N(5)-C(17)-C(18)-C(23)  | 3.7(2)      |
| C(23)-C(18)-C(19)-C(20) | -2.8(3)     |
| C(17)-C(18)-C(19)-C(20) | -172.7(2)   |
| C(18)-C(19)-C(20)-C(21) | -1.1(3)     |
| C(18)-C(19)-C(20)-Cl(6) | 177.26(18)  |
| C(19)-C(20)-C(21)-C(22) | 3.5(4)      |
| Cl(6)-C(20)-C(21)-C(22) | -174.76(18) |
| C(19)-C(20)-C(21)-Cl(7) | -178.02(18) |
| Cl(6)-C(20)-C(21)-Cl(7) | 3.7(3)      |
| C(20)-C(21)-C(22)-C(23) | -1.9(3)     |
| Cl(7)-C(21)-C(22)-C(23) | 179.67(16)  |
| C(21)-C(22)-C(23)-C(18) | -1.9(3)     |
| C(21)-C(22)-C(23)-C(24) | 169.7(2)    |
| C(19)-C(18)-C(23)-C(22) | 4.4(3)      |
| C(17)-C(18)-C(23)-C(22) | 176.23(19)  |
| C(19)-C(18)-C(23)-C(24) | -169.3(2)   |
| C(17)-C(18)-C(23)-C(24) | 2.5(2)      |
| C(1)-N(6)-C(24)-N(5)    | 7.9(3)      |
| C(1)-N(6)-C(24)-C(23)   | -153.9(2)   |
| C(17)-N(5)-C(24)-N(6)   | -155.0(2)   |
| B(1)-N(5)-C(24)-N(6)    | 12.9(3)     |
| C(17)-N(5)-C(24)-C(23)  | 10.8(2)     |
| B(1)-N(5)-C(24)-C(23)   | 178.73(19)  |
| C(22)-C(23)-C(24)-N(6)  | -16.1(4)    |



|                        |           |
|------------------------|-----------|
| C(18)-C(23)-C(24)-N(6) | 156.3(2)  |
| C(22)-C(23)-C(24)-N(5) | 179.8(2)  |
| C(18)-C(23)-C(24)-N(5) | -7.8(2)   |
| C(8)-N(1)-B(1)-N(5)    | -138.3(2) |
| C(1)-N(1)-B(1)-N(5)    | 27.7(3)   |
| C(8)-N(1)-B(1)-N(3)    | -27.7(3)  |
| C(1)-N(1)-B(1)-N(3)    | 138.4(2)  |
| C(8)-N(1)-B(1)-Cl(1)   | 97.1(2)   |
| C(1)-N(1)-B(1)-Cl(1)   | -96.9(2)  |
| C(17)-N(5)-B(1)-N(1)   | 138.4(2)  |
| C(24)-N(5)-B(1)-N(1)   | -28.4(3)  |
| C(17)-N(5)-B(1)-N(3)   | 27.5(3)   |
| C(24)-N(5)-B(1)-N(3)   | -139.3(2) |
| C(17)-N(5)-B(1)-Cl(1)  | -96.6(2)  |
| C(24)-N(5)-B(1)-Cl(1)  | 96.6(2)   |
| C(9)-N(3)-B(1)-N(1)    | 27.5(3)   |
| C(16)-N(3)-B(1)-N(1)   | -137.4(2) |
| C(9)-N(3)-B(1)-N(5)    | 138.5(2)  |
| C(16)-N(3)-B(1)-N(5)   | -26.3(3)  |
| C(9)-N(3)-B(1)-Cl(1)   | -97.5(2)  |
| C(16)-N(3)-B(1)-Cl(1)  | 97.6(2)   |

---

Symmetry transformations used to generate equivalent atoms:

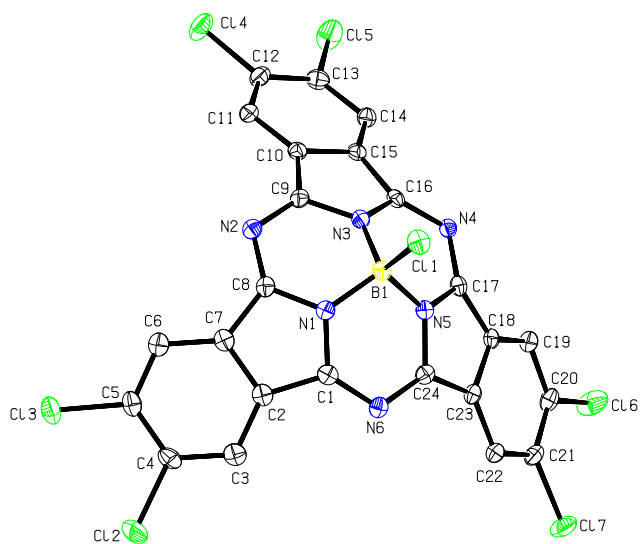

Figure S9: Anisotropic displacement ellipsoid plot of Cl-Cl<sub>6</sub>BsubPc (DiChlorobenzene:Heptane; CCDC deposit 2087096).

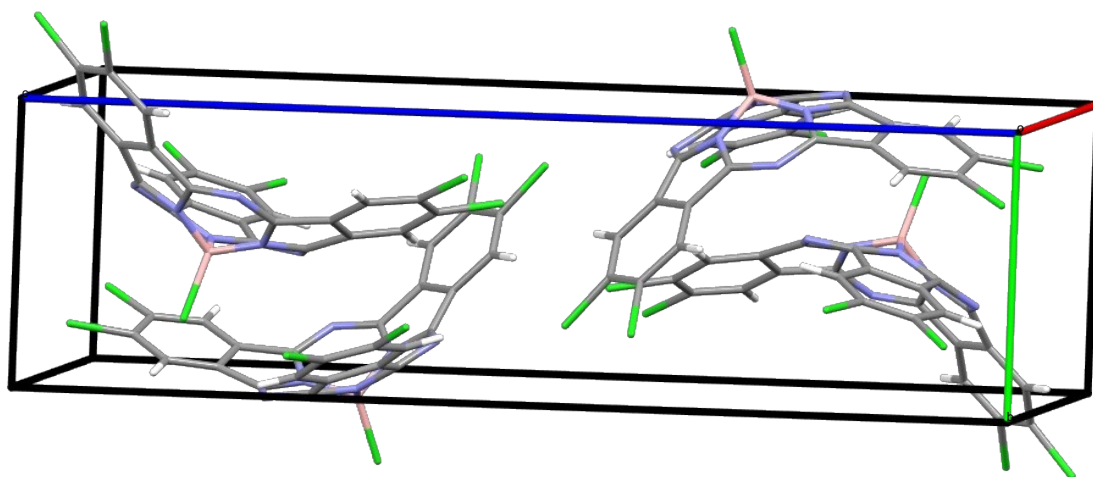

Figure S10: Populated unit cell of Cl-Cl<sub>6</sub>BsubPc (DiChlorobenzene:Heptane; CCDC deposit 2087096).

Table S 13. Crystal data and structure refinement for **Cl-Cl<sub>6</sub>BsubPc (DiChlorobenzene:Heptane; CCDC deposit 2087096)**.

|                                   |                                                                 |                 |
|-----------------------------------|-----------------------------------------------------------------|-----------------|
| Identification code               | d19197_a                                                        |                 |
| Empirical formula                 | C <sub>24</sub> H <sub>6</sub> B Cl <sub>7</sub> N <sub>6</sub> |                 |
| Formula weight                    | 637.31                                                          |                 |
| Temperature                       | 150(2) K                                                        |                 |
| Wavelength                        | 0.71073 Å                                                       |                 |
| Crystal system                    | Monoclinic                                                      |                 |
| Space group                       | P2 <sub>1</sub> /n                                              |                 |
| Unit cell dimensions              | a = 13.0941(8) Å                                                | α = 90°.        |
|                                   | b = 7.4220(4) Å                                                 | β = 99.487(2)°. |
|                                   | c = 25.4950(17) Å                                               | γ = 90°.        |
| Volume                            | 2443.8(3) Å <sup>3</sup>                                        |                 |
| Z                                 | 4                                                               |                 |
| Density (calculated)              | 1.732 Mg/m <sup>3</sup>                                         |                 |
| Absorption coefficient            | 0.843 mm <sup>-1</sup>                                          |                 |
| F(000)                            | 1264                                                            |                 |
| Crystal size                      | 0.280 x 0.050 x 0.040 mm <sup>3</sup>                           |                 |
| Theta range for data collection   | 1.620 to 27.587°.                                               |                 |
| Index ranges                      | -17 ≤ h ≤ 16, -9 ≤ k ≤ 7, -33 ≤ l ≤ 33                          |                 |
| Reflections collected             | 48146                                                           |                 |
| Independent reflections           | 5655 [R(int) = 0.0568]                                          |                 |
| Completeness to theta = 25.242°   | 100.0 %                                                         |                 |
| Absorption correction             | Semi-empirical from equivalents                                 |                 |
| Max. and min. transmission        | 0.7456 and 0.6796                                               |                 |
| Refinement method                 | Full-matrix least-squares on F <sup>2</sup>                     |                 |
| Data / restraints / parameters    | 5655 / 0 / 343                                                  |                 |
| Goodness-of-fit on F <sup>2</sup> | 1.037                                                           |                 |
| Final R indices [I > 2σ(I)]       | R1 = 0.0341, wR2 = 0.0671                                       |                 |
| R indices (all data)              | R1 = 0.0604, wR2 = 0.0780                                       |                 |
| Extinction coefficient            | n/a                                                             |                 |
| Largest diff. peak and hole       | 0.451 and -0.375 e.Å <sup>-3</sup>                              |                 |

Table S 14. Atomic coordinates ( $\times 10^4$ ) and equivalent isotropic displacement parameters ( $\text{\AA}^2 \times 10^3$ ) for **Cl-Cl<sub>6</sub>BsubPc (DiChlorobenzene:Heptane; CCDC deposit 2087096)**.  $U(\text{eq})$  is defined as one third of the trace of the orthogonalized  $U^{ij}$  tensor.

|       | x        | y        | z       | U(eq) |
|-------|----------|----------|---------|-------|
| Cl(1) | 6127(1)  | -2524(1) | 3389(1) | 22(1) |
| Cl(2) | 3568(1)  | 7805(1)  | 4092(1) | 43(1) |
| Cl(3) | 5624(1)  | 7812(1)  | 4919(1) | 28(1) |
| Cl(4) | 12062(1) | 2781(1)  | 4100(1) | 32(1) |
| Cl(5) | 12098(1) | 1655(1)  | 2915(1) | 36(1) |
| Cl(6) | 6010(1)  | 1842(1)  | 242(1)  | 35(1) |
| Cl(7) | 3778(1)  | 2924(1)  | 436(1)  | 29(1) |
| N(1)  | 6029(1)  | 1212(2)  | 3480(1) | 15(1) |
| N(2)  | 7620(1)  | 1841(2)  | 4051(1) | 17(1) |
| N(3)  | 7598(1)  | 100(2)   | 3267(1) | 15(1) |
| N(4)  | 7738(1)  | -289(2)  | 2354(1) | 15(1) |
| N(5)  | 6087(1)  | 135(2)   | 2617(1) | 15(1) |
| N(6)  | 4659(1)  | 1913(2)  | 2773(1) | 17(1) |
| C(1)  | 5128(2)  | 2086(3)  | 3282(1) | 17(1) |
| C(2)  | 5005(2)  | 3454(3)  | 3678(1) | 17(1) |
| C(3)  | 4261(2)  | 4783(3)  | 3694(1) | 21(1) |
| C(4)  | 4447(2)  | 6078(3)  | 4088(1) | 22(1) |
| C(5)  | 5364(2)  | 6068(3)  | 4466(1) | 20(1) |
| C(6)  | 6099(2)  | 4745(3)  | 4461(1) | 19(1) |
| C(7)  | 5918(2)  | 3433(3)  | 4066(1) | 17(1) |
| C(8)  | 6590(2)  | 2046(3)  | 3911(1) | 16(1) |
| C(9)  | 8111(2)  | 967(3)   | 3705(1) | 16(1) |
| C(10) | 9179(2)  | 1125(3)  | 3618(1) | 16(1) |
| C(11) | 10053(2) | 1842(3)  | 3929(1) | 19(1) |
| C(12) | 10951(2) | 1961(3)  | 3710(1) | 21(1) |
| C(13) | 10971(2) | 1432(3)  | 3182(1) | 21(1) |
| C(14) | 10103(2) | 727(3)   | 2866(1) | 18(1) |
| C(15) | 9210(2)  | 524(3)   | 3091(1) | 16(1) |
| C(16) | 8168(2)  | -52(3)   | 2864(1) | 15(1) |
| C(17) | 6706(2)  | -51(3)   | 2238(1) | 15(1) |

|       |         |         |         |       |
|-------|---------|---------|---------|-------|
| C(18) | 6085(2) | 525(3)  | 1747(1) | 15(1) |
| C(19) | 6354(2) | 731(3)  | 1246(1) | 18(1) |
| C(20) | 5639(2) | 1495(3) | 854(1)  | 20(1) |
| C(21) | 4655(2) | 2034(3) | 952(1)  | 19(1) |
| C(22) | 4391(2) | 1884(3) | 1456(1) | 18(1) |
| C(23) | 5119(2) | 1151(3) | 1861(1) | 16(1) |
| C(24) | 5180(2) | 1020(3) | 2440(1) | 16(1) |
| B(1)  | 6463(2) | -248(3) | 3188(1) | 15(1) |

---

Table S 15. Bond lengths [Å] and angles [°] for **Cl-Cl<sub>6</sub>BsubPc (DiChlorobenzene:Heptane; CCDC deposit 2087096)**.

---

|             |          |
|-------------|----------|
| Cl(1)-B(1)  | 1.840(2) |
| Cl(2)-C(4)  | 1.724(2) |
| Cl(3)-C(5)  | 1.731(2) |
| Cl(4)-C(12) | 1.731(2) |
| Cl(5)-C(13) | 1.732(2) |
| Cl(6)-C(20) | 1.728(2) |
| Cl(7)-C(21) | 1.727(2) |
| N(1)-C(8)   | 1.366(3) |
| N(1)-C(1)   | 1.369(3) |
| N(1)-B(1)   | 1.481(3) |
| N(2)-C(9)   | 1.343(3) |
| N(2)-C(8)   | 1.345(3) |
| N(3)-C(9)   | 1.366(3) |
| N(3)-C(16)  | 1.370(3) |
| N(3)-B(1)   | 1.488(3) |
| N(4)-C(16)  | 1.343(3) |
| N(4)-C(17)  | 1.346(3) |
| N(5)-C(17)  | 1.365(3) |
| N(5)-C(24)  | 1.368(3) |
| N(5)-B(1)   | 1.484(3) |
| N(6)-C(1)   | 1.346(3) |
| N(6)-C(24)  | 1.349(3) |
| C(1)-C(2)   | 1.460(3) |
| C(2)-C(3)   | 1.391(3) |
| C(2)-C(7)   | 1.421(3) |
| C(3)-C(4)   | 1.382(3) |
| C(3)-H(3A)  | 0.9500   |
| C(4)-C(5)   | 1.411(3) |
| C(5)-C(6)   | 1.377(3) |
| C(6)-C(7)   | 1.392(3) |
| C(6)-H(6A)  | 0.9500   |
| C(7)-C(8)   | 1.451(3) |

|                  |            |
|------------------|------------|
| C(9)-C(10)       | 1.456(3)   |
| C(10)-C(11)      | 1.386(3)   |
| C(10)-C(15)      | 1.424(3)   |
| C(11)-C(12)      | 1.384(3)   |
| C(11)-H(11A)     | 0.9500     |
| C(12)-C(13)      | 1.408(3)   |
| C(13)-C(14)      | 1.383(3)   |
| C(14)-C(15)      | 1.391(3)   |
| C(14)-H(14A)     | 0.9500     |
| C(15)-C(16)      | 1.455(3)   |
| C(17)-C(18)      | 1.441(3)   |
| C(18)-C(19)      | 1.389(3)   |
| C(18)-C(23)      | 1.421(3)   |
| C(19)-C(20)      | 1.375(3)   |
| C(19)-H(19A)     | 0.9500     |
| C(20)-C(21)      | 1.410(3)   |
| C(21)-C(22)      | 1.390(3)   |
| C(22)-C(23)      | 1.395(3)   |
| C(22)-H(22A)     | 0.9500     |
| C(23)-C(24)      | 1.467(3)   |
|                  |            |
| C(8)-N(1)-C(1)   | 113.53(17) |
| C(8)-N(1)-B(1)   | 122.46(18) |
| C(1)-N(1)-B(1)   | 122.70(18) |
| C(9)-N(2)-C(8)   | 116.65(18) |
| C(9)-N(3)-C(16)  | 113.26(17) |
| C(9)-N(3)-B(1)   | 122.59(17) |
| C(16)-N(3)-B(1)  | 122.67(18) |
| C(16)-N(4)-C(17) | 116.14(17) |
| C(17)-N(5)-C(24) | 113.51(17) |
| C(17)-N(5)-B(1)  | 122.27(17) |
| C(24)-N(5)-B(1)  | 123.07(17) |
| C(1)-N(6)-C(24)  | 117.19(18) |
| N(6)-C(1)-N(1)   | 122.60(19) |
| N(6)-C(1)-C(2)   | 130.4(2)   |
| N(1)-C(1)-C(2)   | 105.11(18) |

|                    |            |
|--------------------|------------|
| C(3)-C(2)-C(7)     | 120.1(2)   |
| C(3)-C(2)-C(1)     | 132.1(2)   |
| C(7)-C(2)-C(1)     | 107.35(18) |
| C(4)-C(3)-C(2)     | 118.2(2)   |
| C(4)-C(3)-H(3A)    | 120.9      |
| C(2)-C(3)-H(3A)    | 120.9      |
| C(3)-C(4)-C(5)     | 121.4(2)   |
| C(3)-C(4)-Cl(2)    | 118.92(18) |
| C(5)-C(4)-Cl(2)    | 119.58(17) |
| C(6)-C(5)-C(4)     | 121.0(2)   |
| C(6)-C(5)-Cl(3)    | 118.60(18) |
| C(4)-C(5)-Cl(3)    | 120.27(17) |
| C(5)-C(6)-C(7)     | 118.0(2)   |
| C(5)-C(6)-H(6A)    | 121.0      |
| C(7)-C(6)-H(6A)    | 121.0      |
| C(6)-C(7)-C(2)     | 121.3(2)   |
| C(6)-C(7)-C(8)     | 130.9(2)   |
| C(2)-C(7)-C(8)     | 107.28(18) |
| N(2)-C(8)-N(1)     | 123.02(18) |
| N(2)-C(8)-C(7)     | 129.4(2)   |
| N(1)-C(8)-C(7)     | 105.70(18) |
| N(2)-C(9)-N(3)     | 122.71(19) |
| N(2)-C(9)-C(10)    | 129.60(19) |
| N(3)-C(9)-C(10)    | 105.65(17) |
| C(11)-C(10)-C(15)  | 120.66(19) |
| C(11)-C(10)-C(9)   | 131.88(19) |
| C(15)-C(10)-C(9)   | 107.22(18) |
| C(12)-C(11)-C(10)  | 118.1(2)   |
| C(12)-C(11)-H(11A) | 120.9      |
| C(10)-C(11)-H(11A) | 120.9      |
| C(11)-C(12)-C(13)  | 121.2(2)   |
| C(11)-C(12)-Cl(4)  | 118.79(17) |
| C(13)-C(12)-Cl(4)  | 120.00(16) |
| C(14)-C(13)-C(12)  | 121.24(19) |
| C(14)-C(13)-Cl(5)  | 118.66(17) |
| C(12)-C(13)-Cl(5)  | 120.10(17) |



|                    |            |
|--------------------|------------|
| C(13)-C(14)-C(15)  | 117.90(19) |
| C(13)-C(14)-H(14A) | 121.0      |
| C(15)-C(14)-H(14A) | 121.0      |
| C(14)-C(15)-C(10)  | 120.73(19) |
| C(14)-C(15)-C(16)  | 131.71(19) |
| C(10)-C(15)-C(16)  | 107.17(18) |
| N(4)-C(16)-N(3)    | 122.89(19) |
| N(4)-C(16)-C(15)   | 129.75(18) |
| N(3)-C(16)-C(15)   | 105.72(17) |
| N(4)-C(17)-N(5)    | 123.36(18) |
| N(4)-C(17)-C(18)   | 129.15(18) |
| N(5)-C(17)-C(18)   | 105.57(17) |
| C(19)-C(18)-C(23)  | 121.4(2)   |
| C(19)-C(18)-C(17)  | 129.72(19) |
| C(23)-C(18)-C(17)  | 108.27(18) |
| C(20)-C(19)-C(18)  | 118.0(2)   |
| C(20)-C(19)-H(19A) | 121.0      |
| C(18)-C(19)-H(19A) | 121.0      |
| C(19)-C(20)-C(21)  | 121.39(19) |
| C(19)-C(20)-Cl(6)  | 117.32(17) |
| C(21)-C(20)-Cl(6)  | 121.25(17) |
| C(22)-C(21)-C(20)  | 120.99(19) |
| C(22)-C(21)-Cl(7)  | 119.92(17) |
| C(20)-C(21)-Cl(7)  | 119.08(16) |
| C(21)-C(22)-C(23)  | 118.2(2)   |
| C(21)-C(22)-H(22A) | 120.9      |
| C(23)-C(22)-H(22A) | 120.9      |
| C(22)-C(23)-C(18)  | 119.91(19) |
| C(22)-C(23)-C(24)  | 133.4(2)   |
| C(18)-C(23)-C(24)  | 106.34(18) |
| N(6)-C(24)-N(5)    | 121.97(19) |
| N(6)-C(24)-C(23)   | 130.71(19) |
| N(5)-C(24)-C(23)   | 105.32(17) |
| N(1)-B(1)-N(5)     | 105.12(17) |
| N(1)-B(1)-N(3)     | 105.19(18) |
| N(5)-B(1)-N(3)     | 105.19(16) |

|                 |            |
|-----------------|------------|
| N(1)-B(1)-Cl(1) | 113.66(15) |
| N(5)-B(1)-Cl(1) | 113.16(16) |
| N(3)-B(1)-Cl(1) | 113.65(16) |

---

Symmetry transformations used to generate equivalent atoms:

Table S 16. Anisotropic displacement parameters ( $\text{\AA}^2 \times 10^3$ ) for **Cl-Cl<sub>6</sub>BsubPc (DiChlorobenzene:Heptane; CCDC deposit 2087096)**. The anisotropic displacement factor exponent takes the form:  $-2\pi^2 [h^2 a^{*2} U^{11} + \dots + 2 h k a^* b^* U^{12}]$ .

|       | U <sup>11</sup> | U <sup>22</sup> | U <sup>33</sup> | U <sup>23</sup> | U <sup>13</sup> | U <sup>12</sup> |
|-------|-----------------|-----------------|-----------------|-----------------|-----------------|-----------------|
| Cl(1) | 28(1)           | 17(1)           | 23(1)           | 4(1)            | 8(1)            | -4(1)           |
| Cl(2) | 27(1)           | 43(1)           | 58(1)           | -22(1)          | 3(1)            | 13(1)           |
| Cl(3) | 32(1)           | 26(1)           | 29(1)           | -10(1)          | 10(1)           | -2(1)           |
| Cl(4) | 19(1)           | 51(1)           | 25(1)           | -9(1)           | 0(1)            | -8(1)           |
| Cl(5) | 22(1)           | 57(1)           | 31(1)           | -11(1)          | 11(1)           | -10(1)          |
| Cl(6) | 30(1)           | 59(1)           | 15(1)           | 10(1)           | 5(1)            | 6(1)            |
| Cl(7) | 24(1)           | 41(1)           | 20(1)           | 5(1)            | -4(1)           | 5(1)            |
| N(1)  | 16(1)           | 16(1)           | 14(1)           | 1(1)            | 4(1)            | -1(1)           |
| N(2)  | 20(1)           | 18(1)           | 13(1)           | 2(1)            | 3(1)            | 0(1)            |
| N(3)  | 18(1)           | 14(1)           | 14(1)           | 1(1)            | 3(1)            | 1(1)            |
| N(4)  | 17(1)           | 14(1)           | 14(1)           | 0(1)            | 2(1)            | 0(1)            |
| N(5)  | 16(1)           | 14(1)           | 15(1)           | 0(1)            | 4(1)            | -2(1)           |
| N(6)  | 15(1)           | 18(1)           | 17(1)           | -1(1)           | 4(1)            | -4(1)           |
| C(1)  | 15(1)           | 15(1)           | 20(1)           | 2(1)            | 6(1)            | -3(1)           |
| C(2)  | 17(1)           | 19(1)           | 18(1)           | 1(1)            | 9(1)            | -4(1)           |
| C(3)  | 16(1)           | 24(1)           | 24(1)           | 0(1)            | 9(1)            | -3(1)           |
| C(4)  | 17(1)           | 23(1)           | 28(1)           | -1(1)           | 12(1)           | 2(1)            |
| C(5)  | 23(1)           | 21(1)           | 20(1)           | -4(1)           | 12(1)           | -5(1)           |
| C(6)  | 21(1)           | 22(1)           | 16(1)           | 1(1)            | 8(1)            | -4(1)           |
| C(7)  | 20(1)           | 18(1)           | 16(1)           | 2(1)            | 8(1)            | -2(1)           |
| C(8)  | 20(1)           | 16(1)           | 13(1)           | 2(1)            | 4(1)            | -2(1)           |
| C(9)  | 20(1)           | 14(1)           | 12(1)           | 3(1)            | 1(1)            | 1(1)            |
| C(10) | 19(1)           | 15(1)           | 15(1)           | 2(1)            | 2(1)            | 3(1)            |
| C(11) | 19(1)           | 21(1)           | 15(1)           | -1(1)           | 0(1)            | 3(1)            |
| C(12) | 18(1)           | 22(1)           | 20(1)           | -1(1)           | -2(1)           | -1(1)           |
| C(13) | 18(1)           | 23(1)           | 23(1)           | 1(1)            | 6(1)            | 2(1)            |
| C(14) | 20(1)           | 19(1)           | 15(1)           | -1(1)           | 3(1)            | 2(1)            |
| C(15) | 18(1)           | 12(1)           | 16(1)           | 2(1)            | 2(1)            | 3(1)            |
| C(16) | 19(1)           | 11(1)           | 16(1)           | 1(1)            | 4(1)            | 2(1)            |
| C(17) | 19(1)           | 11(1)           | 15(1)           | -1(1)           | 5(1)            | -3(1)           |

|       |       |       |       |       |       |       |
|-------|-------|-------|-------|-------|-------|-------|
| C(18) | 17(1) | 12(1) | 16(1) | -3(1) | 2(1)  | -3(1) |
| C(19) | 18(1) | 18(1) | 17(1) | -1(1) | 3(1)  | -2(1) |
| C(20) | 22(1) | 24(1) | 13(1) | -1(1) | 2(1)  | -4(1) |
| C(21) | 20(1) | 20(1) | 17(1) | 1(1)  | -3(1) | -3(1) |
| C(22) | 16(1) | 19(1) | 20(1) | -3(1) | 0(1)  | -1(1) |
| C(23) | 16(1) | 16(1) | 16(1) | -2(1) | 1(1)  | -3(1) |
| C(24) | 15(1) | 15(1) | 19(1) | 1(1)  | 2(1)  | -4(1) |
| B(1)  | 18(1) | 13(1) | 16(1) | 2(1)  | 4(1)  | -2(1) |

---

Table S 17. Hydrogen coordinates ( $\times 10^4$ ) and isotropic displacement parameters ( $\text{\AA}^2 \times 10^{-3}$ ) for **Cl-Cl<sub>6</sub>BsubPc (DiChlorobenzene:Heptane; CCDC deposit 2087096)**.

|        | x     | y    | z    | U(eq) |
|--------|-------|------|------|-------|
| H(3A)  | 3642  | 4800 | 3440 | 25    |
| H(6A)  | 6712  | 4728 | 4719 | 23    |
| H(11A) | 10036 | 2240 | 4281 | 23    |
| H(14A) | 10116 | 391  | 2508 | 22    |
| H(19A) | 7013  | 356  | 1177 | 21    |
| H(22A) | 3733  | 2270 | 1523 | 22    |

Table S 18. Torsion angles [°] for Cl-Cl<sub>6</sub>BsubPc (DiChlorobenzene:Heptane; CCDC deposit 2087096).

---

|                       |             |
|-----------------------|-------------|
| C(24)-N(6)-C(1)-N(1)  | -8.4(3)     |
| C(24)-N(6)-C(1)-C(2)  | 153.7(2)    |
| C(8)-N(1)-C(1)-N(6)   | 155.51(19)  |
| B(1)-N(1)-C(1)-N(6)   | -11.7(3)    |
| C(8)-N(1)-C(1)-C(2)   | -10.4(2)    |
| B(1)-N(1)-C(1)-C(2)   | -177.63(18) |
| N(6)-C(1)-C(2)-C(3)   | 13.5(4)     |
| N(1)-C(1)-C(2)-C(3)   | 177.9(2)    |
| N(6)-C(1)-C(2)-C(7)   | -158.0(2)   |
| N(1)-C(1)-C(2)-C(7)   | 6.4(2)      |
| C(7)-C(2)-C(3)-C(4)   | 1.1(3)      |
| C(1)-C(2)-C(3)-C(4)   | -169.5(2)   |
| C(2)-C(3)-C(4)-C(5)   | 0.0(3)      |
| C(2)-C(3)-C(4)-Cl(2)  | 176.51(16)  |
| C(3)-C(4)-C(5)-C(6)   | -1.1(3)     |
| Cl(2)-C(4)-C(5)-C(6)  | -177.56(17) |
| C(3)-C(4)-C(5)-Cl(3)  | 174.57(17)  |
| Cl(2)-C(4)-C(5)-Cl(3) | -1.9(3)     |
| C(4)-C(5)-C(6)-C(7)   | 1.0(3)      |
| Cl(3)-C(5)-C(6)-C(7)  | -174.77(15) |
| C(5)-C(6)-C(7)-C(2)   | 0.2(3)      |
| C(5)-C(6)-C(7)-C(8)   | 170.2(2)    |
| C(3)-C(2)-C(7)-C(6)   | -1.2(3)     |
| C(1)-C(2)-C(7)-C(6)   | 171.47(18)  |
| C(3)-C(2)-C(7)-C(8)   | -173.37(18) |
| C(1)-C(2)-C(7)-C(8)   | -0.7(2)     |
| C(9)-N(2)-C(8)-N(1)   | 9.0(3)      |
| C(9)-N(2)-C(8)-C(7)   | -153.0(2)   |
| C(1)-N(1)-C(8)-N(2)   | -155.48(19) |
| B(1)-N(1)-C(8)-N(2)   | 11.7(3)     |
| C(1)-N(1)-C(8)-C(7)   | 10.1(2)     |
| B(1)-N(1)-C(8)-C(7)   | 177.31(18)  |
| C(6)-C(7)-C(8)-N(2)   | -12.1(4)    |

|                         |             |
|-------------------------|-------------|
| C(2)-C(7)-C(8)-N(2)     | 159.0(2)    |
| C(6)-C(7)-C(8)-N(1)     | -176.4(2)   |
| C(2)-C(7)-C(8)-N(1)     | -5.4(2)     |
| C(8)-N(2)-C(9)-N(3)     | -8.9(3)     |
| C(8)-N(2)-C(9)-C(10)    | 152.5(2)    |
| C(16)-N(3)-C(9)-N(2)    | 154.70(19)  |
| B(1)-N(3)-C(9)-N(2)     | -11.8(3)    |
| C(16)-N(3)-C(9)-C(10)   | -10.5(2)    |
| B(1)-N(3)-C(9)-C(10)    | -176.97(18) |
| N(2)-C(9)-C(10)-C(11)   | 17.7(4)     |
| N(3)-C(9)-C(10)-C(11)   | -178.5(2)   |
| N(2)-C(9)-C(10)-C(15)   | -156.6(2)   |
| N(3)-C(9)-C(10)-C(15)   | 7.2(2)      |
| C(15)-C(10)-C(11)-C(12) | 0.2(3)      |
| C(9)-C(10)-C(11)-C(12)  | -173.4(2)   |
| C(10)-C(11)-C(12)-C(13) | 2.3(3)      |
| C(10)-C(11)-C(12)-Cl(4) | -177.81(17) |
| C(11)-C(12)-C(13)-C(14) | -1.9(4)     |
| Cl(4)-C(12)-C(13)-C(14) | 178.23(18)  |
| C(11)-C(12)-C(13)-Cl(5) | 178.23(18)  |
| Cl(4)-C(12)-C(13)-Cl(5) | -1.7(3)     |
| C(12)-C(13)-C(14)-C(15) | -1.1(3)     |
| Cl(5)-C(13)-C(14)-C(15) | 178.77(17)  |
| C(13)-C(14)-C(15)-C(10) | 3.6(3)      |
| C(13)-C(14)-C(15)-C(16) | 175.5(2)    |
| C(11)-C(10)-C(15)-C(14) | -3.2(3)     |
| C(9)-C(10)-C(15)-C(14)  | 171.83(19)  |
| C(11)-C(10)-C(15)-C(16) | -176.88(19) |
| C(9)-C(10)-C(15)-C(16)  | -1.8(2)     |
| C(17)-N(4)-C(16)-N(3)   | 11.5(3)     |
| C(17)-N(4)-C(16)-C(15)  | -151.7(2)   |
| C(9)-N(3)-C(16)-N(4)    | -157.33(19) |
| B(1)-N(3)-C(16)-N(4)    | 9.1(3)      |
| C(9)-N(3)-C(16)-C(15)   | 9.4(2)      |
| B(1)-N(3)-C(16)-C(15)   | 175.83(18)  |
| C(14)-C(15)-C(16)-N(4)  | -11.5(4)    |

|                         |             |
|-------------------------|-------------|
| C(10)-C(15)-C(16)-N(4)  | 161.2(2)    |
| C(14)-C(15)-C(16)-N(3)  | -176.9(2)   |
| C(10)-C(15)-C(16)-N(3)  | -4.2(2)     |
| C(16)-N(4)-C(17)-N(5)   | -10.3(3)    |
| C(16)-N(4)-C(17)-C(18)  | 151.6(2)    |
| C(24)-N(5)-C(17)-N(4)   | 156.41(19)  |
| B(1)-N(5)-C(17)-N(4)    | -11.7(3)    |
| C(24)-N(5)-C(17)-C(18)  | -9.1(2)     |
| B(1)-N(5)-C(17)-C(18)   | -177.21(18) |
| N(4)-C(17)-C(18)-C(19)  | 10.5(4)     |
| N(5)-C(17)-C(18)-C(19)  | 174.9(2)    |
| N(4)-C(17)-C(18)-C(23)  | -160.7(2)   |
| N(5)-C(17)-C(18)-C(23)  | 3.6(2)      |
| C(23)-C(18)-C(19)-C(20) | -2.7(3)     |
| C(17)-C(18)-C(19)-C(20) | -173.0(2)   |
| C(18)-C(19)-C(20)-C(21) | -0.8(3)     |
| C(18)-C(19)-C(20)-Cl(6) | 176.94(17)  |
| C(19)-C(20)-C(21)-C(22) | 2.9(3)      |
| Cl(6)-C(20)-C(21)-C(22) | -174.81(17) |
| C(19)-C(20)-C(21)-Cl(7) | -178.10(17) |
| Cl(6)-C(20)-C(21)-Cl(7) | 4.2(3)      |
| C(20)-C(21)-C(22)-C(23) | -1.3(3)     |
| Cl(7)-C(21)-C(22)-C(23) | 179.73(16)  |
| C(21)-C(22)-C(23)-C(18) | -2.2(3)     |
| C(21)-C(22)-C(23)-C(24) | 169.8(2)    |
| C(19)-C(18)-C(23)-C(22) | 4.3(3)      |
| C(17)-C(18)-C(23)-C(22) | 176.42(19)  |
| C(19)-C(18)-C(23)-C(24) | -169.68(19) |
| C(17)-C(18)-C(23)-C(24) | 2.4(2)      |
| C(1)-N(6)-C(24)-N(5)    | 7.7(3)      |
| C(1)-N(6)-C(24)-C(23)   | -153.7(2)   |
| C(17)-N(5)-C(24)-N(6)   | -154.93(19) |
| B(1)-N(5)-C(24)-N(6)    | 13.1(3)     |
| C(17)-N(5)-C(24)-C(23)  | 10.6(2)     |
| B(1)-N(5)-C(24)-C(23)   | 178.59(18)  |
| C(22)-C(23)-C(24)-N(6)  | -16.7(4)    |



|                        |             |
|------------------------|-------------|
| C(18)-C(23)-C(24)-N(6) | 156.2(2)    |
| C(22)-C(23)-C(24)-N(5) | 179.6(2)    |
| C(18)-C(23)-C(24)-N(5) | -7.6(2)     |
| C(8)-N(1)-B(1)-N(5)    | -138.47(18) |
| C(1)-N(1)-B(1)-N(5)    | 27.6(3)     |
| C(8)-N(1)-B(1)-N(3)    | -27.7(3)    |
| C(1)-N(1)-B(1)-N(3)    | 138.35(18)  |
| C(8)-N(1)-B(1)-Cl(1)   | 97.3(2)     |
| C(1)-N(1)-B(1)-Cl(1)   | -96.7(2)    |
| C(17)-N(5)-B(1)-N(1)   | 138.61(19)  |
| C(24)-N(5)-B(1)-N(1)   | -28.4(3)    |
| C(17)-N(5)-B(1)-N(3)   | 27.8(3)     |
| C(24)-N(5)-B(1)-N(3)   | -139.15(19) |
| C(17)-N(5)-B(1)-Cl(1)  | -96.8(2)    |
| C(24)-N(5)-B(1)-Cl(1)  | 96.2(2)     |
| C(9)-N(3)-B(1)-N(1)    | 27.8(3)     |
| C(16)-N(3)-B(1)-N(1)   | -137.43(19) |
| C(9)-N(3)-B(1)-N(5)    | 138.51(19)  |
| C(16)-N(3)-B(1)-N(5)   | -26.7(3)    |
| C(9)-N(3)-B(1)-Cl(1)   | -97.2(2)    |
| C(16)-N(3)-B(1)-Cl(1)  | 97.6(2)     |

---

Symmetry transformations used to generate equivalent atoms:

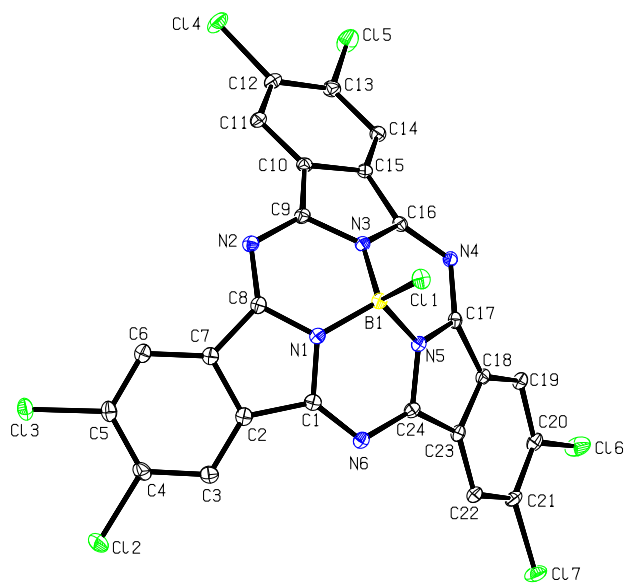

Figure S11: Anisotropic displacement ellipsoid of Cl-Cl<sub>6</sub>BsubPc (Dichlorobenzene:Dimethoxybenzene:Heptane; CCDC deposit 2087097).

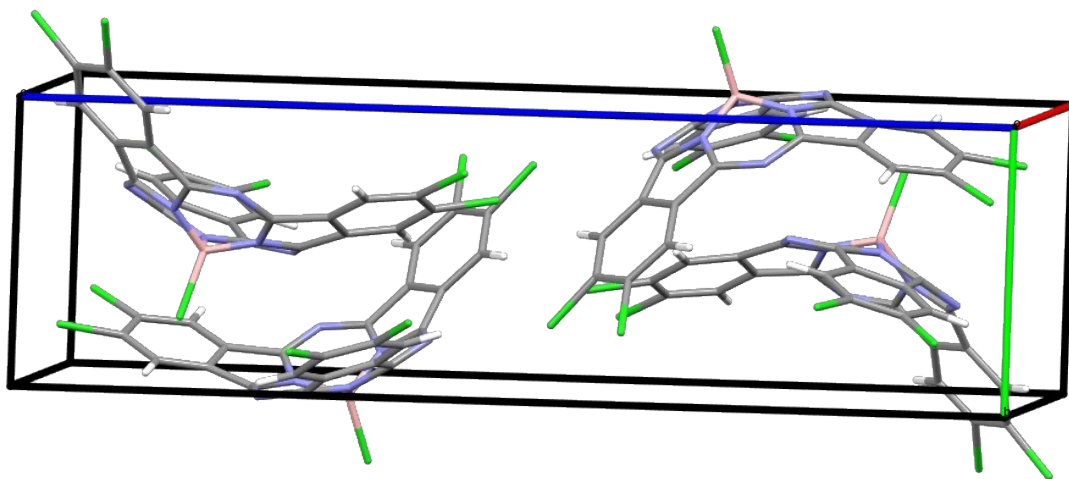

Figure S12: Populated unit cell of Cl-Cl<sub>6</sub>BsubPc (Dichlorobenzene:Dimethoxybenzene:Heptane; CCDC deposit 2087097).



Table S 19. Crystal data and structure refinement for **Cl-Cl<sub>6</sub>BsubPc (Dichlorobenzene:Dimethoxybenzene:Heptane; CCDC deposit 2087097)**.

|                                   |                                                                 |                 |
|-----------------------------------|-----------------------------------------------------------------|-----------------|
| Identification code               | d19196_a                                                        |                 |
| Empirical formula                 | C <sub>24</sub> H <sub>6</sub> B Cl <sub>7</sub> N <sub>6</sub> |                 |
| Formula weight                    | 637.31                                                          |                 |
| Temperature                       | 150(2) K                                                        |                 |
| Wavelength                        | 0.71073 Å                                                       |                 |
| Crystal system                    | Monoclinic                                                      |                 |
| Space group                       | P2 <sub>1</sub> /n                                              |                 |
| Unit cell dimensions              | a = 13.0807(7) Å                                                | α = 90°.        |
|                                   | b = 7.4178(3) Å                                                 | β = 99.502(2)°. |
|                                   | c = 25.4738(13) Å                                               | γ = 90°.        |
| Volume                            | 2437.8(2) Å <sup>3</sup>                                        |                 |
| Z                                 | 4                                                               |                 |
| Density (calculated)              | 1.736 Mg/m <sup>3</sup>                                         |                 |
| Absorption coefficient            | 0.845 mm <sup>-1</sup>                                          |                 |
| F(000)                            | 1264                                                            |                 |
| Crystal size                      | 0.150 x 0.100 x 0.100 mm <sup>3</sup>                           |                 |
| Theta range for data collection   | 1.621 to 27.697°.                                               |                 |
| Index ranges                      | -17<=h<=17, -9<=k<=9, -33<=l<=33                                |                 |
| Reflections collected             | 33605                                                           |                 |
| Independent reflections           | 5672 [R(int) = 0.0225]                                          |                 |
| Completeness to theta = 25.242°   | 100.0 %                                                         |                 |
| Absorption correction             | Semi-empirical from equivalents                                 |                 |
| Max. and min. transmission        | 0.7456 and 0.7196                                               |                 |
| Refinement method                 | Full-matrix least-squares on F <sup>2</sup>                     |                 |
| Data / restraints / parameters    | 5672 / 0 / 343                                                  |                 |
| Goodness-of-fit on F <sup>2</sup> | 1.025                                                           |                 |
| Final R indices [I>2sigma(I)]     | R1 = 0.0263, wR2 = 0.0654                                       |                 |
| R indices (all data)              | R1 = 0.0323, wR2 = 0.0690                                       |                 |
| Extinction coefficient            | n/a                                                             |                 |
| Largest diff. peak and hole       | 0.383 and -0.352 e.Å <sup>-3</sup>                              |                 |

Table S 20. Atomic coordinates ( $\times 10^4$ ) and equivalent isotropic displacement parameters ( $\text{\AA}^2 \times 10^3$ ) for **Cl-Cl<sub>6</sub>BsubPc (Dichlorobenzene:Dimethoxybenzene:Heptane; CCDC deposit 2087097)**. U(eq) is defined as one third of the trace of the orthogonalized  $U^{ij}$  tensor.

|       | x        | y        | z       | U(eq) |
|-------|----------|----------|---------|-------|
| Cl(1) | 6127(1)  | -2522(1) | 3389(1) | 23(1) |
| Cl(2) | 3568(1)  | 7805(1)  | 4092(1) | 44(1) |
| Cl(3) | 5624(1)  | 7811(1)  | 4920(1) | 29(1) |
| Cl(4) | 12062(1) | 2782(1)  | 4099(1) | 32(1) |
| Cl(5) | 12099(1) | 1657(1)  | 2915(1) | 36(1) |
| Cl(6) | 6011(1)  | 1843(1)  | 242(1)  | 35(1) |
| Cl(7) | 3779(1)  | 2925(1)  | 436(1)  | 30(1) |
| N(1)  | 6029(1)  | 1212(2)  | 3480(1) | 16(1) |
| N(2)  | 7620(1)  | 1841(2)  | 4051(1) | 18(1) |
| N(3)  | 7599(1)  | 101(2)   | 3267(1) | 16(1) |
| N(4)  | 7738(1)  | -288(2)  | 2354(1) | 16(1) |
| N(5)  | 6087(1)  | 138(2)   | 2616(1) | 16(1) |
| N(6)  | 4658(1)  | 1913(2)  | 2773(1) | 18(1) |
| C(1)  | 5129(1)  | 2089(2)  | 3282(1) | 17(1) |
| C(2)  | 5003(1)  | 3458(2)  | 3678(1) | 18(1) |
| C(3)  | 4260(1)  | 4785(2)  | 3693(1) | 21(1) |
| C(4)  | 4450(1)  | 6078(2)  | 4089(1) | 23(1) |
| C(5)  | 5366(1)  | 6074(2)  | 4466(1) | 22(1) |
| C(6)  | 6103(1)  | 4744(2)  | 4462(1) | 20(1) |
| C(7)  | 5918(1)  | 3433(2)  | 4067(1) | 18(1) |
| C(8)  | 6592(1)  | 2043(2)  | 3912(1) | 17(1) |
| C(9)  | 8112(1)  | 968(2)   | 3705(1) | 17(1) |
| C(10) | 9180(1)  | 1120(2)  | 3618(1) | 17(1) |
| C(11) | 10055(1) | 1847(2)  | 3930(1) | 20(1) |
| C(12) | 10952(1) | 1967(2)  | 3711(1) | 21(1) |
| C(13) | 10973(1) | 1438(2)  | 3182(1) | 21(1) |
| C(14) | 10102(1) | 729(2)   | 2865(1) | 19(1) |
| C(15) | 9210(1)  | 527(2)   | 3091(1) | 17(1) |
| C(16) | 8171(1)  | -51(2)   | 2865(1) | 16(1) |
| C(17) | 6707(1)  | -49(2)   | 2239(1) | 16(1) |

|       |         |         |         |       |
|-------|---------|---------|---------|-------|
| C(18) | 6084(1) | 526(2)  | 1747(1) | 17(1) |
| C(19) | 6357(1) | 731(2)  | 1246(1) | 18(1) |
| C(20) | 5640(1) | 1500(2) | 853(1)  | 20(1) |
| C(21) | 4655(1) | 2034(2) | 952(1)  | 20(1) |
| C(22) | 4392(1) | 1889(2) | 1456(1) | 19(1) |
| C(23) | 5119(1) | 1155(2) | 1862(1) | 17(1) |
| C(24) | 5180(1) | 1022(2) | 2439(1) | 17(1) |
| B(1)  | 6464(1) | -244(2) | 3188(1) | 16(1) |

---

Table S 21. Bond lengths [Å] and angles [°] for **Cl-Cl<sub>6</sub>BsubPc (Dichlorobenzene:Dimethoxybenzene:Heptane; CCDC deposit 2087097)**.

---

|             |            |
|-------------|------------|
| Cl(1)-B(1)  | 1.8403(16) |
| Cl(2)-C(4)  | 1.7242(16) |
| Cl(3)-C(5)  | 1.7268(15) |
| Cl(4)-C(12) | 1.7259(15) |
| Cl(5)-C(13) | 1.7288(15) |
| Cl(6)-C(20) | 1.7244(15) |
| Cl(7)-C(21) | 1.7259(15) |
| N(1)-C(8)   | 1.3654(18) |
| N(1)-C(1)   | 1.3674(18) |
| N(1)-B(1)   | 1.479(2)   |
| N(2)-C(9)   | 1.3416(18) |
| N(2)-C(8)   | 1.3423(19) |
| N(3)-C(9)   | 1.3652(18) |
| N(3)-C(16)  | 1.3679(17) |
| N(3)-B(1)   | 1.4866(19) |
| N(4)-C(16)  | 1.3429(18) |
| N(4)-C(17)  | 1.3428(18) |
| N(5)-C(17)  | 1.3630(17) |
| N(5)-C(24)  | 1.3655(18) |
| N(5)-B(1)   | 1.4849(19) |
| N(6)-C(1)   | 1.3460(18) |
| N(6)-C(24)  | 1.3477(18) |
| C(1)-C(2)   | 1.460(2)   |
| C(2)-C(3)   | 1.389(2)   |
| C(2)-C(7)   | 1.422(2)   |
| C(3)-C(4)   | 1.385(2)   |
| C(3)-H(3A)  | 0.9500     |
| C(4)-C(5)   | 1.407(2)   |
| C(5)-C(6)   | 1.380(2)   |
| C(6)-C(7)   | 1.391(2)   |
| C(6)-H(6A)  | 0.9500     |
| C(7)-C(8)   | 1.453(2)   |

|              |            |
|--------------|------------|
| C(9)-C(10)   | 1.4535(19) |
| C(10)-C(11)  | 1.390(2)   |
| C(10)-C(15)  | 1.4202(19) |
| C(11)-C(12)  | 1.382(2)   |
| C(11)-H(11A) | 0.9500     |
| C(12)-C(13)  | 1.408(2)   |
| C(13)-C(14)  | 1.386(2)   |
| C(14)-C(15)  | 1.3904(19) |
| C(14)-H(14A) | 0.9500     |
| C(15)-C(16)  | 1.4505(19) |
| C(17)-C(18)  | 1.4426(19) |
| C(18)-C(19)  | 1.3883(19) |
| C(18)-C(23)  | 1.4210(19) |
| C(19)-C(20)  | 1.378(2)   |
| C(19)-H(19A) | 0.9500     |
| C(20)-C(21)  | 1.410(2)   |
| C(21)-C(22)  | 1.386(2)   |
| C(22)-C(23)  | 1.395(2)   |
| C(22)-H(22A) | 0.9500     |
| C(23)-C(24)  | 1.4642(19) |

|                  |            |
|------------------|------------|
| C(8)-N(1)-C(1)   | 113.58(12) |
| C(8)-N(1)-B(1)   | 122.34(12) |
| C(1)-N(1)-B(1)   | 122.74(12) |
| C(9)-N(2)-C(8)   | 116.68(12) |
| C(9)-N(3)-C(16)  | 113.20(12) |
| C(9)-N(3)-B(1)   | 122.51(12) |
| C(16)-N(3)-B(1)  | 122.82(12) |
| C(16)-N(4)-C(17) | 116.25(12) |
| C(17)-N(5)-C(24) | 113.68(12) |
| C(17)-N(5)-B(1)  | 122.11(12) |
| C(24)-N(5)-B(1)  | 123.04(12) |
| C(1)-N(6)-C(24)  | 117.10(12) |
| N(6)-C(1)-N(1)   | 122.62(13) |
| N(6)-C(1)-C(2)   | 130.35(13) |
| N(1)-C(1)-C(2)   | 105.26(12) |



|                    |            |
|--------------------|------------|
| C(3)-C(2)-C(7)     | 120.15(14) |
| C(3)-C(2)-C(1)     | 132.15(14) |
| C(7)-C(2)-C(1)     | 107.18(12) |
| C(4)-C(3)-C(2)     | 117.99(14) |
| C(4)-C(3)-H(3A)    | 121.0      |
| C(2)-C(3)-H(3A)    | 121.0      |
| C(3)-C(4)-C(5)     | 121.71(14) |
| C(3)-C(4)-Cl(2)    | 118.61(12) |
| C(5)-C(4)-Cl(2)    | 119.57(12) |
| C(6)-C(5)-C(4)     | 120.90(14) |
| C(6)-C(5)-Cl(3)    | 118.62(12) |
| C(4)-C(5)-Cl(3)    | 120.38(12) |
| C(5)-C(6)-C(7)     | 117.86(14) |
| C(5)-C(6)-H(6A)    | 121.1      |
| C(7)-C(6)-H(6A)    | 121.1      |
| C(6)-C(7)-C(2)     | 121.37(14) |
| C(6)-C(7)-C(8)     | 130.70(14) |
| C(2)-C(7)-C(8)     | 107.33(12) |
| N(2)-C(8)-N(1)     | 123.08(13) |
| N(2)-C(8)-C(7)     | 129.33(13) |
| N(1)-C(8)-C(7)     | 105.62(12) |
| N(2)-C(9)-N(3)     | 122.72(13) |
| N(2)-C(9)-C(10)    | 129.77(13) |
| N(3)-C(9)-C(10)    | 105.51(12) |
| C(11)-C(10)-C(15)  | 120.71(13) |
| C(11)-C(10)-C(9)   | 131.68(13) |
| C(15)-C(10)-C(9)   | 107.33(12) |
| C(12)-C(11)-C(10)  | 117.99(13) |
| C(12)-C(11)-H(11A) | 121.0      |
| C(10)-C(11)-H(11A) | 121.0      |
| C(11)-C(12)-C(13)  | 121.30(13) |
| C(11)-C(12)-Cl(4)  | 118.75(11) |
| C(13)-C(12)-Cl(4)  | 119.95(11) |
| C(14)-C(13)-C(12)  | 121.20(13) |
| C(14)-C(13)-Cl(5)  | 118.63(11) |
| C(12)-C(13)-Cl(5)  | 120.17(12) |

|                    |            |
|--------------------|------------|
| C(13)-C(14)-C(15)  | 117.78(13) |
| C(13)-C(14)-H(14A) | 121.1      |
| C(15)-C(14)-H(14A) | 121.1      |
| C(14)-C(15)-C(10)  | 120.92(13) |
| C(14)-C(15)-C(16)  | 131.56(13) |
| C(10)-C(15)-C(16)  | 107.16(12) |
| N(4)-C(16)-N(3)    | 122.67(12) |
| N(4)-C(16)-C(15)   | 129.85(12) |
| N(3)-C(16)-C(15)   | 105.81(12) |
| N(4)-C(17)-N(5)    | 123.51(12) |
| N(4)-C(17)-C(18)   | 129.15(12) |
| N(5)-C(17)-C(18)   | 105.45(12) |
| C(19)-C(18)-C(23)  | 121.67(13) |
| C(19)-C(18)-C(17)  | 129.56(13) |
| C(23)-C(18)-C(17)  | 108.17(12) |
| C(20)-C(19)-C(18)  | 117.74(13) |
| C(20)-C(19)-H(19A) | 121.1      |
| C(18)-C(19)-H(19A) | 121.1      |
| C(19)-C(20)-C(21)  | 121.27(13) |
| C(19)-C(20)-Cl(6)  | 117.24(11) |
| C(21)-C(20)-Cl(6)  | 121.46(11) |
| C(22)-C(21)-C(20)  | 121.18(13) |
| C(22)-C(21)-Cl(7)  | 119.94(12) |
| C(20)-C(21)-Cl(7)  | 118.87(11) |
| C(21)-C(22)-C(23)  | 118.24(13) |
| C(21)-C(22)-H(22A) | 120.9      |
| C(23)-C(22)-H(22A) | 120.9      |
| C(22)-C(23)-C(18)  | 119.74(13) |
| C(22)-C(23)-C(24)  | 133.55(13) |
| C(18)-C(23)-C(24)  | 106.36(12) |
| N(6)-C(24)-N(5)    | 122.04(12) |
| N(6)-C(24)-C(23)   | 130.65(13) |
| N(5)-C(24)-C(23)   | 105.34(12) |
| N(1)-B(1)-N(5)     | 105.14(12) |
| N(1)-B(1)-N(3)     | 105.33(12) |
| N(5)-B(1)-N(3)     | 105.21(11) |

|                 |            |
|-----------------|------------|
| N(1)-B(1)-Cl(1) | 113.63(10) |
| N(5)-B(1)-Cl(1) | 113.08(10) |
| N(3)-B(1)-Cl(1) | 113.61(11) |

---

Symmetry transformations used to generate equivalent atoms:

Table S 22. Anisotropic displacement parameters ( $\text{\AA}^2 \times 10^3$ ) for **Cl-Cl<sub>6</sub>BsubPc** (**Dichlorobenzene:Dimethoxybenzene:Heptane; CCDC deposit 2087097**). The anisotropic displacement factor exponent takes the form:  $-2\pi^2 [h^2 a^{*2} U^{11} + \dots + 2 h k a^* b^* U^{12}]$ .

|       | U <sup>11</sup> | U <sup>22</sup> | U <sup>33</sup> | U <sup>23</sup> | U <sup>13</sup> | U <sup>12</sup> |
|-------|-----------------|-----------------|-----------------|-----------------|-----------------|-----------------|
| Cl(1) | 28(1)           | 18(1)           | 23(1)           | 4(1)            | 8(1)            | -3(1)           |
| Cl(2) | 26(1)           | 45(1)           | 58(1)           | -23(1)          | 2(1)            | 13(1)           |
| Cl(3) | 32(1)           | 27(1)           | 29(1)           | -10(1)          | 9(1)            | -2(1)           |
| Cl(4) | 18(1)           | 52(1)           | 25(1)           | -9(1)           | -1(1)           | -8(1)           |
| Cl(5) | 21(1)           | 58(1)           | 31(1)           | -11(1)          | 10(1)           | -10(1)          |
| Cl(6) | 30(1)           | 60(1)           | 15(1)           | 10(1)           | 4(1)            | 6(1)            |
| Cl(7) | 24(1)           | 42(1)           | 20(1)           | 5(1)            | -5(1)           | 5(1)            |
| N(1)  | 17(1)           | 18(1)           | 15(1)           | 1(1)            | 4(1)            | -1(1)           |
| N(2)  | 20(1)           | 21(1)           | 14(1)           | 2(1)            | 3(1)            | 1(1)            |
| N(3)  | 18(1)           | 16(1)           | 13(1)           | 1(1)            | 2(1)            | 1(1)            |
| N(4)  | 17(1)           | 15(1)           | 15(1)           | 0(1)            | 2(1)            | 0(1)            |
| N(5)  | 16(1)           | 16(1)           | 15(1)           | 0(1)            | 3(1)            | -2(1)           |
| N(6)  | 16(1)           | 20(1)           | 18(1)           | 0(1)            | 4(1)            | -4(1)           |
| C(1)  | 16(1)           | 18(1)           | 19(1)           | 2(1)            | 6(1)            | -3(1)           |
| C(2)  | 18(1)           | 21(1)           | 18(1)           | 1(1)            | 8(1)            | -4(1)           |
| C(3)  | 15(1)           | 25(1)           | 25(1)           | -1(1)           | 8(1)            | -2(1)           |
| C(4)  | 18(1)           | 26(1)           | 29(1)           | -3(1)           | 11(1)           | 1(1)            |
| C(5)  | 25(1)           | 22(1)           | 20(1)           | -3(1)           | 11(1)           | -4(1)           |
| C(6)  | 21(1)           | 23(1)           | 16(1)           | 0(1)            | 7(1)            | -4(1)           |
| C(7)  | 19(1)           | 20(1)           | 16(1)           | 2(1)            | 7(1)            | -2(1)           |
| C(8)  | 21(1)           | 19(1)           | 13(1)           | 2(1)            | 5(1)            | -2(1)           |
| C(9)  | 20(1)           | 17(1)           | 14(1)           | 3(1)            | 1(1)            | 0(1)            |
| C(10) | 18(1)           | 18(1)           | 15(1)           | 2(1)            | 2(1)            | 3(1)            |
| C(11) | 20(1)           | 23(1)           | 16(1)           | 0(1)            | -1(1)           | 2(1)            |
| C(12) | 17(1)           | 25(1)           | 20(1)           | 0(1)            | -2(1)           | -1(1)           |
| C(13) | 17(1)           | 25(1)           | 23(1)           | 0(1)            | 5(1)            | 1(1)            |
| C(14) | 19(1)           | 20(1)           | 16(1)           | 0(1)            | 2(1)            | 2(1)            |
| C(15) | 18(1)           | 16(1)           | 16(1)           | 1(1)            | 1(1)            | 3(1)            |
| C(16) | 18(1)           | 14(1)           | 17(1)           | 1(1)            | 4(1)            | 1(1)            |
| C(17) | 20(1)           | 14(1)           | 15(1)           | -1(1)           | 4(1)            | -2(1)           |

|       |       |       |       |       |       |       |
|-------|-------|-------|-------|-------|-------|-------|
| C(18) | 17(1) | 16(1) | 16(1) | -1(1) | 1(1)  | -3(1) |
| C(19) | 18(1) | 21(1) | 16(1) | -2(1) | 2(1)  | -3(1) |
| C(20) | 22(1) | 25(1) | 13(1) | 0(1)  | 2(1)  | -4(1) |
| C(21) | 19(1) | 22(1) | 18(1) | 1(1)  | -4(1) | -2(1) |
| C(22) | 16(1) | 21(1) | 20(1) | -2(1) | 0(1)  | -2(1) |
| C(23) | 18(1) | 17(1) | 17(1) | -1(1) | 2(1)  | -4(1) |
| C(24) | 15(1) | 18(1) | 18(1) | 1(1)  | 2(1)  | -3(1) |
| B(1)  | 18(1) | 16(1) | 15(1) | 2(1)  | 3(1)  | -2(1) |

---

Table S 23. Hydrogen coordinates ( $\times 10^4$ ) and isotropic displacement parameters ( $\text{\AA}^2 \times 10^{-3}$ ) for **Cl-Cl<sub>6</sub>BsubPc (Dichlorobenzene:Dimethoxybenzene:Heptane; CCDC deposit 2087097)**.

|        | x     | y    | z    | U(eq) |
|--------|-------|------|------|-------|
| H(3A)  | 3640  | 4804 | 3439 | 26    |
| H(6A)  | 6716  | 4725 | 4720 | 23    |
| H(11A) | 10038 | 2248 | 4282 | 24    |
| H(14A) | 10113 | 393  | 2507 | 22    |
| H(19A) | 7016  | 354  | 1177 | 22    |
| H(22A) | 3734  | 2280 | 1523 | 23    |

Table S 24. Torsion angles [°] for Cl-Cl<sub>6</sub>BsubPc (Dichlorobenzene:Dimethoxybenzene:Heptane; CCDC deposit 2087097).

---

|                       |             |
|-----------------------|-------------|
| C(24)-N(6)-C(1)-N(1)  | -8.8(2)     |
| C(24)-N(6)-C(1)-C(2)  | 153.75(14)  |
| C(8)-N(1)-C(1)-N(6)   | 155.77(13)  |
| B(1)-N(1)-C(1)-N(6)   | -11.3(2)    |
| C(8)-N(1)-C(1)-C(2)   | -10.52(15)  |
| B(1)-N(1)-C(1)-C(2)   | -177.60(12) |
| N(6)-C(1)-C(2)-C(3)   | 13.1(3)     |
| N(1)-C(1)-C(2)-C(3)   | 177.91(15)  |
| N(6)-C(1)-C(2)-C(7)   | -158.35(14) |
| N(1)-C(1)-C(2)-C(7)   | 6.47(15)    |
| C(7)-C(2)-C(3)-C(4)   | 1.1(2)      |
| C(1)-C(2)-C(3)-C(4)   | -169.46(15) |
| C(2)-C(3)-C(4)-C(5)   | 0.3(2)      |
| C(2)-C(3)-C(4)-Cl(2)  | 176.55(11)  |
| C(3)-C(4)-C(5)-C(6)   | -1.5(2)     |
| Cl(2)-C(4)-C(5)-C(6)  | -177.72(11) |
| C(3)-C(4)-C(5)-Cl(3)  | 174.68(12)  |
| Cl(2)-C(4)-C(5)-Cl(3) | -1.49(18)   |
| C(4)-C(5)-C(6)-C(7)   | 1.2(2)      |
| Cl(3)-C(5)-C(6)-C(7)  | -175.07(11) |
| C(5)-C(6)-C(7)-C(2)   | 0.2(2)      |
| C(5)-C(6)-C(7)-C(8)   | 170.12(14)  |
| C(3)-C(2)-C(7)-C(6)   | -1.4(2)     |
| C(1)-C(2)-C(7)-C(6)   | 171.29(13)  |
| C(3)-C(2)-C(7)-C(8)   | -173.39(13) |
| C(1)-C(2)-C(7)-C(8)   | -0.72(15)   |
| C(9)-N(2)-C(8)-N(1)   | 8.8(2)      |
| C(9)-N(2)-C(8)-C(7)   | -152.87(14) |
| C(1)-N(1)-C(8)-N(2)   | -155.23(13) |
| B(1)-N(1)-C(8)-N(2)   | 11.9(2)     |
| C(1)-N(1)-C(8)-C(7)   | 10.11(15)   |
| B(1)-N(1)-C(8)-C(7)   | 177.24(12)  |

|                         |             |
|-------------------------|-------------|
| C(6)-C(7)-C(8)-N(2)     | -12.2(3)    |
| C(2)-C(7)-C(8)-N(2)     | 158.77(14)  |
| C(6)-C(7)-C(8)-N(1)     | -176.31(14) |
| C(2)-C(7)-C(8)-N(1)     | -5.32(15)   |
| C(8)-N(2)-C(9)-N(3)     | -8.8(2)     |
| C(8)-N(2)-C(9)-C(10)    | 152.67(14)  |
| C(16)-N(3)-C(9)-N(2)    | 154.77(13)  |
| B(1)-N(3)-C(9)-N(2)     | -11.7(2)    |
| C(16)-N(3)-C(9)-C(10)   | -10.54(16)  |
| B(1)-N(3)-C(9)-C(10)    | -177.02(12) |
| N(2)-C(9)-C(10)-C(11)   | 17.2(3)     |
| N(3)-C(9)-C(10)-C(11)   | -178.88(15) |
| N(2)-C(9)-C(10)-C(15)   | -156.44(14) |
| N(3)-C(9)-C(10)-C(15)   | 7.45(15)    |
| C(15)-C(10)-C(11)-C(12) | -0.2(2)     |
| C(9)-C(10)-C(11)-C(12)  | -173.15(15) |
| C(10)-C(11)-C(12)-C(13) | 2.4(2)      |
| C(10)-C(11)-C(12)-Cl(4) | -177.48(11) |
| C(11)-C(12)-C(13)-C(14) | -1.8(2)     |
| Cl(4)-C(12)-C(13)-C(14) | 178.10(12)  |
| C(11)-C(12)-C(13)-Cl(5) | 178.40(12)  |
| Cl(4)-C(12)-C(13)-Cl(5) | -1.67(19)   |
| C(12)-C(13)-C(14)-C(15) | -1.1(2)     |
| Cl(5)-C(13)-C(14)-C(15) | 178.63(12)  |
| C(13)-C(14)-C(15)-C(10) | 3.4(2)      |
| C(13)-C(14)-C(15)-C(16) | 175.57(15)  |
| C(11)-C(10)-C(15)-C(14) | -2.8(2)     |
| C(9)-C(10)-C(15)-C(14)  | 171.70(13)  |
| C(11)-C(10)-C(15)-C(16) | -176.68(13) |
| C(9)-C(10)-C(15)-C(16)  | -2.17(15)   |
| C(17)-N(4)-C(16)-N(3)   | 11.5(2)     |
| C(17)-N(4)-C(16)-C(15)  | -151.53(15) |
| C(9)-N(3)-C(16)-N(4)    | -157.31(13) |
| B(1)-N(3)-C(16)-N(4)    | 9.1(2)      |
| C(9)-N(3)-C(16)-C(15)   | 9.23(16)    |
| B(1)-N(3)-C(16)-C(15)   | 175.66(12)  |



|                         |             |
|-------------------------|-------------|
| C(14)-C(15)-C(16)-N(4)  | -11.7(3)    |
| C(10)-C(15)-C(16)-N(4)  | 161.30(14)  |
| C(14)-C(15)-C(16)-N(3)  | -176.88(15) |
| C(10)-C(15)-C(16)-N(3)  | -3.91(15)   |
| C(16)-N(4)-C(17)-N(5)   | -10.3(2)    |
| C(16)-N(4)-C(17)-C(18)  | 151.68(15)  |
| C(24)-N(5)-C(17)-N(4)   | 156.38(13)  |
| B(1)-N(5)-C(17)-N(4)    | -11.6(2)    |
| C(24)-N(5)-C(17)-C(18)  | -9.21(16)   |
| B(1)-N(5)-C(17)-C(18)   | -177.22(12) |
| N(4)-C(17)-C(18)-C(19)  | 10.4(3)     |
| N(5)-C(17)-C(18)-C(19)  | 174.87(15)  |
| N(4)-C(17)-C(18)-C(23)  | -160.70(14) |
| N(5)-C(17)-C(18)-C(23)  | 3.79(15)    |
| C(23)-C(18)-C(19)-C(20) | -2.7(2)     |
| C(17)-C(18)-C(19)-C(20) | -172.77(15) |
| C(18)-C(19)-C(20)-C(21) | -1.1(2)     |
| C(18)-C(19)-C(20)-Cl(6) | 177.04(11)  |
| C(19)-C(20)-C(21)-C(22) | 3.4(2)      |
| Cl(6)-C(20)-C(21)-C(22) | -174.68(12) |
| C(19)-C(20)-C(21)-Cl(7) | -178.04(12) |
| Cl(6)-C(20)-C(21)-Cl(7) | 3.91(19)    |
| C(20)-C(21)-C(22)-C(23) | -1.7(2)     |
| Cl(7)-C(21)-C(22)-C(23) | 179.74(11)  |
| C(21)-C(22)-C(23)-C(18) | -2.1(2)     |
| C(21)-C(22)-C(23)-C(24) | 170.01(15)  |
| C(19)-C(18)-C(23)-C(22) | 4.4(2)      |
| C(17)-C(18)-C(23)-C(22) | 176.32(13)  |
| C(19)-C(18)-C(23)-C(24) | -169.63(13) |
| C(17)-C(18)-C(23)-C(24) | 2.30(16)    |
| C(1)-N(6)-C(24)-N(5)    | 8.0(2)      |
| C(1)-N(6)-C(24)-C(23)   | -153.60(15) |
| C(17)-N(5)-C(24)-N(6)   | -154.98(13) |
| B(1)-N(5)-C(24)-N(6)    | 12.9(2)     |
| C(17)-N(5)-C(24)-C(23)  | 10.63(16)   |
| B(1)-N(5)-C(24)-C(23)   | 178.51(12)  |

|                        |             |
|------------------------|-------------|
| C(22)-C(23)-C(24)-N(6) | -16.5(3)    |
| C(18)-C(23)-C(24)-N(6) | 156.38(14)  |
| C(22)-C(23)-C(24)-N(5) | 179.67(15)  |
| C(18)-C(23)-C(24)-N(5) | -7.50(15)   |
| C(8)-N(1)-B(1)-N(5)    | -138.60(13) |
| C(1)-N(1)-B(1)-N(5)    | 27.35(17)   |
| C(8)-N(1)-B(1)-N(3)    | -27.75(17)  |
| C(1)-N(1)-B(1)-N(3)    | 138.20(13)  |
| C(8)-N(1)-B(1)-Cl(1)   | 97.23(14)   |
| C(1)-N(1)-B(1)-Cl(1)   | -96.82(14)  |
| C(17)-N(5)-B(1)-N(1)   | 138.64(13)  |
| C(24)-N(5)-B(1)-N(1)   | -28.24(17)  |
| C(17)-N(5)-B(1)-N(3)   | 27.70(18)   |
| C(24)-N(5)-B(1)-N(3)   | -139.18(13) |
| C(17)-N(5)-B(1)-Cl(1)  | -96.84(14)  |
| C(24)-N(5)-B(1)-Cl(1)  | 96.28(14)   |
| C(9)-N(3)-B(1)-N(1)    | 27.74(17)   |
| C(16)-N(3)-B(1)-N(1)   | -137.45(13) |
| C(9)-N(3)-B(1)-N(5)    | 138.54(13)  |
| C(16)-N(3)-B(1)-N(5)   | -26.65(18)  |
| C(9)-N(3)-B(1)-Cl(1)   | -97.25(14)  |
| C(16)-N(3)-B(1)-Cl(1)  | 97.56(14)   |

---

Symmetry transformations used to generate equivalent atoms:

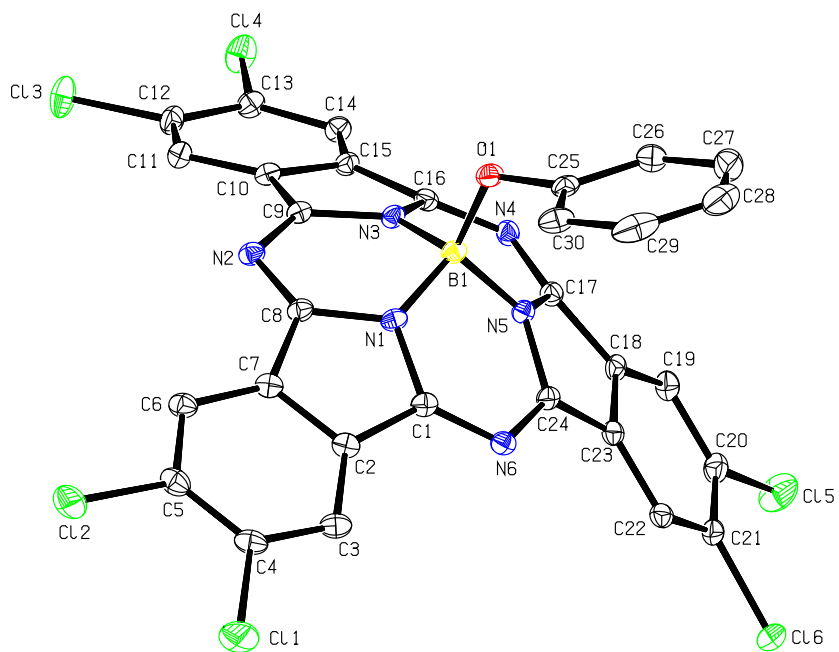

Figure S13: Anisotropic displacement ellipsoid plot of **PhO-Cl<sub>6</sub>BsubPc** (Toluene:Heptane; CCDC deposit **2087093**).

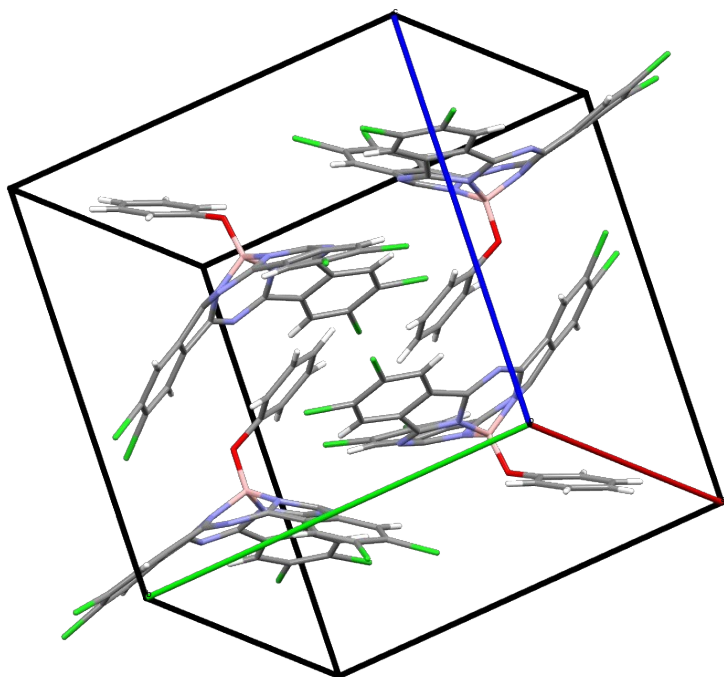

Figure S14: Populated unit Cell of **PhO-Cl<sub>6</sub>BsubPc** (Toluene:Heptane; CCDC deposit 2087093).

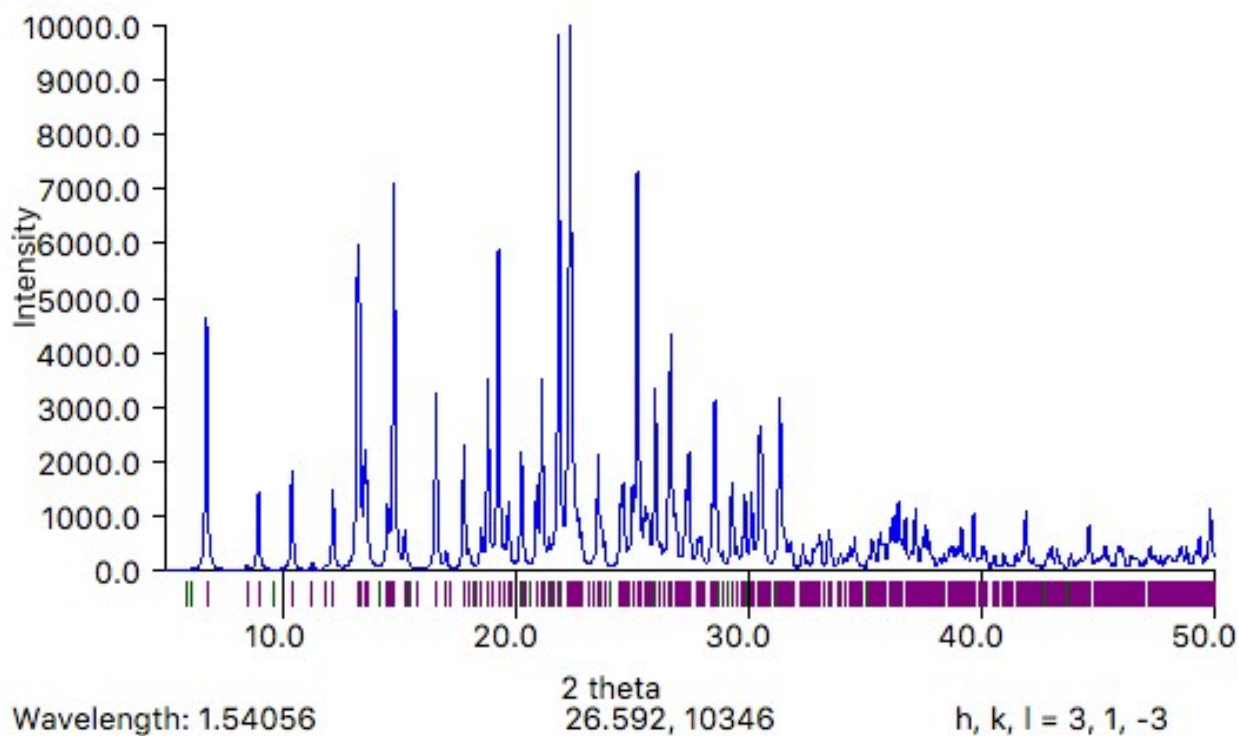

Figure S15: Powder x-ray diffraction of **PhO-Cl<sub>6</sub>BsubPc** (Toluene:Heptane; CCDC deposit 2087093).

Table S 25. Crystal data and structure refinement for **PhO-Cl<sub>6</sub>BsubPc (Toluene:Heptane; CCDC deposit 2087093)**.

|                                   |                                                                    |                 |
|-----------------------------------|--------------------------------------------------------------------|-----------------|
| Identification code               | d19152_a                                                           |                 |
| Empirical formula                 | C <sub>30</sub> H <sub>11</sub> B Cl <sub>6</sub> N <sub>6</sub> O |                 |
| Formula weight                    | 694.96                                                             |                 |
| Temperature                       | 150(2) K                                                           |                 |
| Wavelength                        | 0.71073 Å                                                          |                 |
| Crystal system                    | Monoclinic                                                         |                 |
| Space group                       | P2 <sub>1</sub> /c                                                 |                 |
| Unit cell dimensions              | a = 13.1387(10) Å                                                  | α = 90°.        |
|                                   | b = 14.9262(10) Å                                                  | β = 96.620(2)°. |
|                                   | c = 14.6051(11) Å                                                  | γ = 90°.        |
| Volume                            | 2845.1(4) Å <sup>3</sup>                                           |                 |
| Z                                 | 4                                                                  |                 |
| Density (calculated)              | 1.622 Mg/m <sup>3</sup>                                            |                 |
| Absorption coefficient            | 0.643 mm <sup>-1</sup>                                             |                 |
| F(000)                            | 1392                                                               |                 |
| Crystal size                      | 0.150 x 0.130 x 0.120 mm <sup>3</sup>                              |                 |
| Theta range for data collection   | 1.560 to 27.591°.                                                  |                 |
| Index ranges                      | -17<=h<=17, -18<=k<=19, -17<=l<=18                                 |                 |
| Reflections collected             | 35148                                                              |                 |
| Independent reflections           | 6539 [R(int) = 0.0704]                                             |                 |
| Completeness to theta = 25.242°   | 100.0 %                                                            |                 |
| Absorption correction             | Semi-empirical from equivalents                                    |                 |
| Max. and min. transmission        | 0.7456 and 0.7022                                                  |                 |
| Refinement method                 | Full-matrix least-squares on F <sup>2</sup>                        |                 |
| Data / restraints / parameters    | 6539 / 0 / 397                                                     |                 |
| Goodness-of-fit on F <sup>2</sup> | 1.009                                                              |                 |
| Final R indices [I>2sigma(I)]     | R1 = 0.0409, wR2 = 0.0811                                          |                 |
| R indices (all data)              | R1 = 0.0934, wR2 = 0.1011                                          |                 |
| Extinction coefficient            | n/a                                                                |                 |
| Largest diff. peak and hole       | 0.480 and -0.477 e.Å <sup>-3</sup>                                 |                 |

Table S 26. Atomic coordinates ( $\times 10^4$ ) and equivalent isotropic displacement parameters ( $\text{\AA}^2 \times 10^3$ ) for **PhO-Cl<sub>6</sub>BsubPc (Toluene:Heptane; CCDC deposit 2087093)**. U(eq) is defined as one third of the trace of the orthogonalized  $U^{ij}$  tensor.

|       | x       | y        | z       | U(eq) |
|-------|---------|----------|---------|-------|
| Cl(1) | 9475(1) | 6747(1)  | 6936(1) | 50(1) |
| Cl(2) | 9091(1) | 4693(1)  | 7291(1) | 44(1) |
| Cl(3) | 1849(1) | 2147(1)  | 5613(1) | 40(1) |
| Cl(4) | -138(1) | 3345(1)  | 5320(1) | 37(1) |
| Cl(5) | 1101(1) | 9905(1)  | 4091(1) | 49(1) |
| Cl(6) | 3358(1) | 10665(1) | 4343(1) | 34(1) |
| O(1)  | 3591(1) | 6737(1)  | 8579(1) | 25(1) |
| N(1)  | 4868(2) | 6474(1)  | 7461(1) | 20(1) |
| N(2)  | 4655(2) | 4898(1)  | 7286(1) | 22(1) |
| N(3)  | 3213(2) | 5868(1)  | 7210(1) | 20(1) |
| N(4)  | 1875(2) | 6753(1)  | 6438(1) | 22(1) |
| N(5)  | 3470(2) | 7416(1)  | 7009(1) | 18(1) |
| N(6)  | 5169(2) | 7911(1)  | 6844(1) | 21(1) |
| C(1)  | 5505(2) | 7116(2)  | 7180(2) | 21(1) |
| C(2)  | 6489(2) | 6670(2)  | 7143(2) | 23(1) |
| C(3)  | 7455(2) | 6977(2)  | 6988(2) | 28(1) |
| C(4)  | 8254(2) | 6369(2)  | 7046(2) | 30(1) |
| C(5)  | 8088(2) | 5451(2)  | 7206(2) | 29(1) |
| C(6)  | 7124(2) | 5132(2)  | 7304(2) | 26(1) |
| C(7)  | 6326(2) | 5742(2)  | 7296(2) | 23(1) |
| C(8)  | 5252(2) | 5628(2)  | 7409(2) | 22(1) |
| C(9)  | 3638(2) | 5044(2)  | 7130(2) | 21(1) |
| C(10) | 2820(2) | 4486(2)  | 6682(2) | 22(1) |
| C(11) | 2797(2) | 3593(2)  | 6410(2) | 24(1) |
| C(12) | 1890(2) | 3255(2)  | 5968(2) | 27(1) |
| C(13) | 1012(2) | 3795(2)  | 5802(2) | 26(1) |
| C(14) | 1047(2) | 4698(2)  | 6010(2) | 23(1) |
| C(15) | 1952(2) | 5048(2)  | 6458(2) | 21(1) |
| C(16) | 2261(2) | 5958(2)  | 6736(2) | 20(1) |
| C(17) | 2520(2) | 7459(2)  | 6522(2) | 21(1) |

|       |         |         |          |       |
|-------|---------|---------|----------|-------|
| C(18) | 2512(2) | 8275(2) | 5977(2)  | 21(1) |
| C(19) | 1756(2) | 8674(2) | 5362(2)  | 26(1) |
| C(20) | 2024(2) | 9416(2) | 4876(2)  | 28(1) |
| C(21) | 3026(2) | 9754(2) | 4992(2)  | 25(1) |
| C(22) | 3783(2) | 9360(2) | 5591(2)  | 22(1) |
| C(23) | 3527(2) | 8619(2) | 6089(2)  | 21(1) |
| C(24) | 4145(2) | 8021(2) | 6710(2)  | 20(1) |
| C(25) | 3799(2) | 7523(2) | 9051(2)  | 24(1) |
| C(26) | 2994(2) | 8112(2) | 9137(2)  | 35(1) |
| C(27) | 3169(3) | 8891(2) | 9632(2)  | 52(1) |
| C(28) | 4132(4) | 9094(2) | 10042(2) | 56(1) |
| C(29) | 4934(3) | 8514(2) | 9957(2)  | 49(1) |
| C(30) | 4770(2) | 7712(2) | 9465(2)  | 33(1) |
| B(1)  | 3789(2) | 6651(2) | 7639(2)  | 20(1) |

Table S 27. Bond lengths [ $\text{\AA}$ ] and angles [ $^\circ$ ] for **PhO-Cl<sub>6</sub>BsubPc (Toluene:Heptane; CCDC deposit 2087093)**.

---

|             |          |
|-------------|----------|
| Cl(1)-C(4)  | 1.726(3) |
| Cl(2)-C(5)  | 1.730(3) |
| Cl(3)-C(12) | 1.733(2) |
| Cl(4)-C(13) | 1.728(3) |
| Cl(5)-C(20) | 1.731(3) |
| Cl(6)-C(21) | 1.741(3) |
| O(1)-C(25)  | 1.372(3) |
| O(1)-B(1)   | 1.433(3) |
| N(1)-C(8)   | 1.364(3) |
| N(1)-C(1)   | 1.367(3) |
| N(1)-B(1)   | 1.494(3) |
| N(2)-C(8)   | 1.342(3) |
| N(2)-C(9)   | 1.347(3) |
| N(3)-C(9)   | 1.361(3) |
| N(3)-C(16)  | 1.364(3) |
| N(3)-B(1)   | 1.491(3) |
| N(4)-C(16)  | 1.343(3) |
| N(4)-C(17)  | 1.348(3) |
| N(5)-C(17)  | 1.365(3) |
| N(5)-C(24)  | 1.372(3) |
| N(5)-B(1)   | 1.495(3) |
| N(6)-C(1)   | 1.339(3) |
| N(6)-C(24)  | 1.347(3) |
| C(1)-C(2)   | 1.461(3) |
| C(2)-C(3)   | 1.393(3) |
| C(2)-C(7)   | 1.423(3) |
| C(3)-C(4)   | 1.382(4) |
| C(3)-H(3A)  | 0.9500   |
| C(4)-C(5)   | 1.412(4) |
| C(5)-C(6)   | 1.376(4) |
| C(6)-C(7)   | 1.387(3) |
| C(6)-H(6A)  | 0.9500   |



|                 |            |
|-----------------|------------|
| C(7)-C(8)       | 1.451(3)   |
| C(9)-C(10)      | 1.454(3)   |
| C(10)-C(11)     | 1.391(3)   |
| C(10)-C(15)     | 1.423(3)   |
| C(11)-C(12)     | 1.383(4)   |
| C(11)-H(11A)    | 0.9500     |
| C(12)-C(13)     | 1.405(4)   |
| C(13)-C(14)     | 1.380(3)   |
| C(14)-C(15)     | 1.391(3)   |
| C(14)-H(14A)    | 0.9500     |
| C(15)-C(16)     | 1.462(3)   |
| C(17)-C(18)     | 1.455(3)   |
| C(18)-C(19)     | 1.392(3)   |
| C(18)-C(23)     | 1.421(3)   |
| C(19)-C(20)     | 1.383(4)   |
| C(19)-H(19A)    | 0.9500     |
| C(20)-C(21)     | 1.402(4)   |
| C(21)-C(22)     | 1.378(4)   |
| C(22)-C(23)     | 1.387(3)   |
| C(22)-H(22A)    | 0.9500     |
| C(23)-C(24)     | 1.452(3)   |
| C(25)-C(30)     | 1.377(4)   |
| C(25)-C(26)     | 1.391(4)   |
| C(26)-C(27)     | 1.374(4)   |
| C(26)-H(26A)    | 0.9500     |
| C(27)-C(28)     | 1.369(5)   |
| C(27)-H(27A)    | 0.9500     |
| C(28)-C(29)     | 1.380(5)   |
| C(28)-H(28A)    | 0.9500     |
| C(29)-C(30)     | 1.400(4)   |
| C(29)-H(29A)    | 0.9500     |
| C(30)-H(30A)    | 0.9500     |
| <br>            |            |
| C(25)-O(1)-B(1) | 120.69(19) |
| C(8)-N(1)-C(1)  | 113.0(2)   |
| C(8)-N(1)-B(1)  | 122.5(2)   |

|                  |          |
|------------------|----------|
| C(1)-N(1)-B(1)   | 123.6(2) |
| C(8)-N(2)-C(9)   | 116.4(2) |
| C(9)-N(3)-C(16)  | 114.0(2) |
| C(9)-N(3)-B(1)   | 123.4(2) |
| C(16)-N(3)-B(1)  | 121.8(2) |
| C(16)-N(4)-C(17) | 116.8(2) |
| C(17)-N(5)-C(24) | 112.9(2) |
| C(17)-N(5)-B(1)  | 122.1(2) |
| C(24)-N(5)-B(1)  | 123.6(2) |
| C(1)-N(6)-C(24)  | 116.3(2) |
| N(6)-C(1)-N(1)   | 123.0(2) |
| N(6)-C(1)-C(2)   | 130.3(2) |
| N(1)-C(1)-C(2)   | 105.4(2) |
| C(3)-C(2)-C(7)   | 120.1(2) |
| C(3)-C(2)-C(1)   | 133.1(2) |
| C(7)-C(2)-C(1)   | 106.8(2) |
| C(4)-C(3)-C(2)   | 118.3(2) |
| C(4)-C(3)-H(3A)  | 120.9    |
| C(2)-C(3)-H(3A)  | 120.9    |
| C(3)-C(4)-C(5)   | 121.1(2) |
| C(3)-C(4)-Cl(1)  | 119.2(2) |
| C(5)-C(4)-Cl(1)  | 119.7(2) |
| C(6)-C(5)-C(4)   | 121.0(2) |
| C(6)-C(5)-Cl(2)  | 118.0(2) |
| C(4)-C(5)-Cl(2)  | 121.0(2) |
| C(5)-C(6)-C(7)   | 118.4(2) |
| C(5)-C(6)-H(6A)  | 120.8    |
| C(7)-C(6)-H(6A)  | 120.8    |
| C(6)-C(7)-C(2)   | 120.9(2) |
| C(6)-C(7)-C(8)   | 131.8(2) |
| C(2)-C(7)-C(8)   | 107.3(2) |
| N(2)-C(8)-N(1)   | 123.0(2) |
| N(2)-C(8)-C(7)   | 129.9(2) |
| N(1)-C(8)-C(7)   | 105.6(2) |
| N(2)-C(9)-N(3)   | 122.7(2) |
| N(2)-C(9)-C(10)  | 130.6(2) |

|                    |            |
|--------------------|------------|
| N(3)-C(9)-C(10)    | 105.4(2)   |
| C(11)-C(10)-C(15)  | 120.5(2)   |
| C(11)-C(10)-C(9)   | 131.9(2)   |
| C(15)-C(10)-C(9)   | 107.3(2)   |
| C(12)-C(11)-C(10)  | 118.2(2)   |
| C(12)-C(11)-H(11A) | 120.9      |
| C(10)-C(11)-H(11A) | 120.9      |
| C(11)-C(12)-C(13)  | 121.2(2)   |
| C(11)-C(12)-Cl(3)  | 118.9(2)   |
| C(13)-C(12)-Cl(3)  | 120.0(2)   |
| C(14)-C(13)-C(12)  | 121.1(2)   |
| C(14)-C(13)-Cl(4)  | 118.3(2)   |
| C(12)-C(13)-Cl(4)  | 120.59(19) |
| C(13)-C(14)-C(15)  | 118.3(2)   |
| C(13)-C(14)-H(14A) | 120.8      |
| C(15)-C(14)-H(14A) | 120.8      |
| C(14)-C(15)-C(10)  | 120.4(2)   |
| C(14)-C(15)-C(16)  | 132.4(2)   |
| C(10)-C(15)-C(16)  | 107.1(2)   |
| N(4)-C(16)-N(3)    | 122.8(2)   |
| N(4)-C(16)-C(15)   | 130.5(2)   |
| N(3)-C(16)-C(15)   | 104.9(2)   |
| N(4)-C(17)-N(5)    | 122.6(2)   |
| N(4)-C(17)-C(18)   | 129.8(2)   |
| N(5)-C(17)-C(18)   | 105.8(2)   |
| C(19)-C(18)-C(23)  | 120.6(2)   |
| C(19)-C(18)-C(17)  | 132.1(2)   |
| C(23)-C(18)-C(17)  | 107.0(2)   |
| C(20)-C(19)-C(18)  | 118.0(2)   |
| C(20)-C(19)-H(19A) | 121.0      |
| C(18)-C(19)-H(19A) | 121.0      |
| C(19)-C(20)-C(21)  | 121.1(2)   |
| C(19)-C(20)-Cl(5)  | 118.6(2)   |
| C(21)-C(20)-Cl(5)  | 120.3(2)   |
| C(22)-C(21)-C(20)  | 121.5(2)   |
| C(22)-C(21)-Cl(6)  | 118.1(2)   |

|                    |          |
|--------------------|----------|
| C(20)-C(21)-Cl(6)  | 120.4(2) |
| C(21)-C(22)-C(23)  | 118.2(2) |
| C(21)-C(22)-H(22A) | 120.9    |
| C(23)-C(22)-H(22A) | 120.9    |
| C(22)-C(23)-C(18)  | 120.6(2) |
| C(22)-C(23)-C(24)  | 131.8(2) |
| C(18)-C(23)-C(24)  | 107.4(2) |
| N(6)-C(24)-N(5)    | 123.0(2) |
| N(6)-C(24)-C(23)   | 130.0(2) |
| N(5)-C(24)-C(23)   | 105.5(2) |
| O(1)-C(25)-C(30)   | 121.0(2) |
| O(1)-C(25)-C(26)   | 118.5(2) |
| C(30)-C(25)-C(26)  | 120.4(3) |
| C(27)-C(26)-C(25)  | 120.0(3) |
| C(27)-C(26)-H(26A) | 120.0    |
| C(25)-C(26)-H(26A) | 120.0    |
| C(28)-C(27)-C(26)  | 120.4(3) |
| C(28)-C(27)-H(27A) | 119.8    |
| C(26)-C(27)-H(27A) | 119.8    |
| C(27)-C(28)-C(29)  | 119.9(3) |
| C(27)-C(28)-H(28A) | 120.0    |
| C(29)-C(28)-H(28A) | 120.0    |
| C(28)-C(29)-C(30)  | 120.6(3) |
| C(28)-C(29)-H(29A) | 119.7    |
| C(30)-C(29)-H(29A) | 119.7    |
| C(25)-C(30)-C(29)  | 118.7(3) |
| C(25)-C(30)-H(30A) | 120.7    |
| C(29)-C(30)-H(30A) | 120.7    |
| O(1)-B(1)-N(3)     | 109.5(2) |
| O(1)-B(1)-N(1)     | 117.6(2) |
| N(3)-B(1)-N(1)     | 103.5(2) |
| O(1)-B(1)-N(5)     | 116.9(2) |
| N(3)-B(1)-N(5)     | 104.4(2) |
| N(1)-B(1)-N(5)     | 103.5(2) |

---

Symmetry transformations used to generate equivalent atoms:

Table S 28. Anisotropic displacement parameters ( $\text{\AA}^2 \times 10^3$ ) for **PhO-Cl<sub>6</sub>BsubPc (Toluene:Heptane; CCDC deposit 2087093)**. The anisotropic displacement factor exponent takes the form:  $-2\pi^2 [h^2 a^{*2} U^{11} + \dots + 2 h k a^* b^* U^{12}]$ .

|       | U <sup>11</sup> | U <sup>22</sup> | U <sup>33</sup> | U <sup>23</sup> | U <sup>13</sup> | U <sup>12</sup> |
|-------|-----------------|-----------------|-----------------|-----------------|-----------------|-----------------|
| Cl(1) | 21(1)           | 57(1)           | 75(1)           | 10(1)           | 15(1)           | -6(1)           |
| Cl(2) | 24(1)           | 51(1)           | 57(1)           | 5(1)            | 11(1)           | 10(1)           |
| Cl(3) | 51(1)           | 21(1)           | 45(1)           | -11(1)          | -8(1)           | 2(1)            |
| Cl(4) | 32(1)           | 28(1)           | 49(1)           | -7(1)           | -10(1)          | -8(1)           |
| Cl(5) | 41(1)           | 47(1)           | 56(1)           | 22(1)           | -10(1)          | 4(1)            |
| Cl(6) | 43(1)           | 26(1)           | 34(1)           | 10(1)           | 10(1)           | 3(1)            |
| O(1)  | 31(1)           | 23(1)           | 21(1)           | 0(1)            | 7(1)            | -5(1)           |
| N(1)  | 19(1)           | 22(1)           | 20(1)           | 1(1)            | 1(1)            | -5(1)           |
| N(2)  | 19(1)           | 23(1)           | 22(1)           | 5(1)            | 1(1)            | 0(1)            |
| N(3)  | 17(1)           | 17(1)           | 24(1)           | 1(1)            | 2(1)            | -3(1)           |
| N(4)  | 18(1)           | 20(1)           | 28(1)           | -2(1)           | 4(1)            | 0(1)            |
| N(5)  | 18(1)           | 17(1)           | 19(1)           | -2(1)           | 1(1)            | -3(1)           |
| N(6)  | 20(1)           | 21(1)           | 22(1)           | -4(1)           | 3(1)            | -5(1)           |
| C(1)  | 20(1)           | 23(1)           | 20(1)           | -2(1)           | 0(1)            | -6(1)           |
| C(2)  | 19(1)           | 28(1)           | 20(1)           | -1(1)           | 0(1)            | -2(1)           |
| C(3)  | 23(1)           | 34(2)           | 26(2)           | 2(1)            | 2(1)            | -7(1)           |
| C(4)  | 19(1)           | 41(2)           | 30(2)           | 2(1)            | 6(1)            | -4(1)           |
| C(5)  | 22(1)           | 39(2)           | 27(2)           | 1(1)            | 3(1)            | 4(1)            |
| C(6)  | 24(1)           | 31(2)           | 21(1)           | 4(1)            | 3(1)            | 1(1)            |
| C(7)  | 21(1)           | 28(1)           | 19(1)           | 1(1)            | 1(1)            | -2(1)           |
| C(8)  | 22(1)           | 23(1)           | 19(1)           | 4(1)            | 1(1)            | 0(1)            |
| C(9)  | 22(1)           | 20(1)           | 20(1)           | 2(1)            | 3(1)            | -3(1)           |
| C(10) | 21(1)           | 22(1)           | 22(1)           | 3(1)            | 3(1)            | -3(1)           |
| C(11) | 25(1)           | 20(1)           | 26(2)           | 1(1)            | 2(1)            | 1(1)            |
| C(12) | 34(2)           | 18(1)           | 27(2)           | -2(1)           | 2(1)            | -1(1)           |
| C(13) | 27(1)           | 24(1)           | 25(2)           | -1(1)           | 0(1)            | -4(1)           |
| C(14) | 21(1)           | 23(1)           | 25(1)           | 1(1)            | 1(1)            | -1(1)           |
| C(15) | 21(1)           | 19(1)           | 24(1)           | 1(1)            | 3(1)            | -3(1)           |
| C(16) | 18(1)           | 22(1)           | 21(1)           | -2(1)           | 5(1)            | -2(1)           |

|       |        |       |       |       |       |        |
|-------|--------|-------|-------|-------|-------|--------|
| C(17) | 20(1)  | 20(1) | 22(1) | -1(1) | 2(1)  | 0(1)   |
| C(18) | 27(1)  | 16(1) | 20(1) | -5(1) | 2(1)  | 0(1)   |
| C(19) | 23(1)  | 23(1) | 31(2) | -4(1) | 1(1)  | 1(1)   |
| C(20) | 31(2)  | 24(1) | 28(2) | 1(1)  | 1(1)  | 6(1)   |
| C(21) | 34(2)  | 18(1) | 25(1) | -1(1) | 8(1)  | 2(1)   |
| C(22) | 24(1)  | 20(1) | 23(1) | -5(1) | 6(1)  | -3(1)  |
| C(23) | 24(1)  | 18(1) | 21(1) | -5(1) | 4(1)  | -1(1)  |
| C(24) | 25(1)  | 17(1) | 18(1) | -4(1) | 3(1)  | -5(1)  |
| C(25) | 35(2)  | 23(1) | 15(1) | 3(1)  | 5(1)  | -5(1)  |
| C(26) | 43(2)  | 34(2) | 28(2) | 4(1)  | 11(1) | 3(1)   |
| C(27) | 86(3)  | 34(2) | 41(2) | 3(2)  | 30(2) | 11(2)  |
| C(28) | 109(3) | 34(2) | 28(2) | -7(2) | 25(2) | -17(2) |
| C(29) | 67(2)  | 54(2) | 24(2) | 3(2)  | -4(2) | -35(2) |
| C(30) | 36(2)  | 38(2) | 23(2) | 6(1)  | 1(1)  | -9(1)  |
| B(1)  | 22(1)  | 20(1) | 19(2) | 0(1)  | 2(1)  | -3(1)  |

---

Table S 29. Hydrogen coordinates ( $\times 10^4$ ) and isotropic displacement parameters ( $\text{\AA}^2 \times 10^3$ ) for **PhO-Cl<sub>6</sub>BsubPc** (Toluene:Heptane; CCDC deposit 2087093).

|        | x    | y    | z     | U(eq) |
|--------|------|------|-------|-------|
| H(3A)  | 7563 | 7588 | 6845  | 33    |
| H(6A)  | 7007 | 4509 | 7376  | 31    |
| H(11A) | 3387 | 3225 | 6525  | 29    |
| H(14A) | 467  | 5070 | 5852  | 28    |
| H(19A) | 1078 | 8443 | 5280  | 31    |
| H(22A) | 4462 | 9590 | 5661  | 27    |
| H(26A) | 2325 | 7975 | 8854  | 42    |
| H(27A) | 2618 | 9291 | 9691  | 62    |
| H(28A) | 4247 | 9632 | 10384 | 67    |
| H(29A) | 5602 | 8661 | 10235 | 59    |
| H(30A) | 5319 | 7306 | 9417  | 39    |

Table S 30. Torsion angles [°] for **PhO-Cl<sub>6</sub>BsubPc (Toluene:Heptane; CCDC deposit 2087093)**.

---

|                       |           |
|-----------------------|-----------|
| C(24)-N(6)-C(1)-N(1)  | -6.1(3)   |
| C(24)-N(6)-C(1)-C(2)  | 158.6(2)  |
| C(8)-N(1)-C(1)-N(6)   | 154.2(2)  |
| B(1)-N(1)-C(1)-N(6)   | -15.2(4)  |
| C(8)-N(1)-C(1)-C(2)   | -13.8(3)  |
| B(1)-N(1)-C(1)-C(2)   | 176.8(2)  |
| N(6)-C(1)-C(2)-C(3)   | 19.8(5)   |
| N(1)-C(1)-C(2)-C(3)   | -173.4(3) |
| N(6)-C(1)-C(2)-C(7)   | -159.4(2) |
| N(1)-C(1)-C(2)-C(7)   | 7.4(3)    |
| C(7)-C(2)-C(3)-C(4)   | -4.1(4)   |
| C(1)-C(2)-C(3)-C(4)   | 176.7(3)  |
| C(2)-C(3)-C(4)-C(5)   | 3.6(4)    |
| C(2)-C(3)-C(4)-Cl(1)  | -175.5(2) |
| C(3)-C(4)-C(5)-C(6)   | 0.4(4)    |
| Cl(1)-C(4)-C(5)-C(6)  | 179.5(2)  |
| C(3)-C(4)-C(5)-Cl(2)  | -179.4(2) |
| Cl(1)-C(4)-C(5)-Cl(2) | -0.2(3)   |
| C(4)-C(5)-C(6)-C(7)   | -3.7(4)   |
| Cl(2)-C(5)-C(6)-C(7)  | 176.0(2)  |
| C(5)-C(6)-C(7)-C(2)   | 3.1(4)    |
| C(5)-C(6)-C(7)-C(8)   | -177.8(3) |
| C(3)-C(2)-C(7)-C(6)   | 0.8(4)    |
| C(1)-C(2)-C(7)-C(6)   | -179.8(2) |
| C(3)-C(2)-C(7)-C(8)   | -178.5(2) |
| C(1)-C(2)-C(7)-C(8)   | 0.9(3)    |
| C(9)-N(2)-C(8)-N(1)   | 5.8(3)    |
| C(9)-N(2)-C(8)-C(7)   | -157.8(2) |
| C(1)-N(1)-C(8)-N(2)   | -152.6(2) |
| B(1)-N(1)-C(8)-N(2)   | 16.9(4)   |
| C(1)-N(1)-C(8)-C(7)   | 14.4(3)   |
| B(1)-N(1)-C(8)-C(7)   | -176.1(2) |
| C(6)-C(7)-C(8)-N(2)   | -22.3(5)  |



|                         |           |
|-------------------------|-----------|
| C(2)-C(7)-C(8)-N(2)     | 156.9(3)  |
| C(6)-C(7)-C(8)-N(1)     | 171.9(3)  |
| C(2)-C(7)-C(8)-N(1)     | -8.8(3)   |
| C(8)-N(2)-C(9)-N(3)     | -8.4(3)   |
| C(8)-N(2)-C(9)-C(10)    | 157.0(2)  |
| C(16)-N(3)-C(9)-N(2)    | 158.5(2)  |
| B(1)-N(3)-C(9)-N(2)     | -11.6(4)  |
| C(16)-N(3)-C(9)-C(10)   | -10.1(3)  |
| B(1)-N(3)-C(9)-C(10)    | 179.8(2)  |
| N(2)-C(9)-C(10)-C(11)   | 11.8(5)   |
| N(3)-C(9)-C(10)-C(11)   | 179.1(3)  |
| N(2)-C(9)-C(10)-C(15)   | -163.1(2) |
| N(3)-C(9)-C(10)-C(15)   | 4.1(3)    |
| C(15)-C(10)-C(11)-C(12) | -3.8(4)   |
| C(9)-C(10)-C(11)-C(12)  | -178.2(3) |
| C(10)-C(11)-C(12)-C(13) | -0.4(4)   |
| C(10)-C(11)-C(12)-Cl(3) | 179.3(2)  |
| C(11)-C(12)-C(13)-C(14) | 5.0(4)    |
| Cl(3)-C(12)-C(13)-C(14) | -174.7(2) |
| C(11)-C(12)-C(13)-Cl(4) | -175.6(2) |
| Cl(3)-C(12)-C(13)-Cl(4) | 4.7(3)    |
| C(12)-C(13)-C(14)-C(15) | -5.1(4)   |
| Cl(4)-C(13)-C(14)-C(15) | 175.5(2)  |
| C(13)-C(14)-C(15)-C(10) | 0.8(4)    |
| C(13)-C(14)-C(15)-C(16) | 176.8(3)  |
| C(11)-C(10)-C(15)-C(14) | 3.7(4)    |
| C(9)-C(10)-C(15)-C(14)  | 179.3(2)  |
| C(11)-C(10)-C(15)-C(16) | -173.2(2) |
| C(9)-C(10)-C(15)-C(16)  | 2.5(3)    |
| C(17)-N(4)-C(16)-N(3)   | 8.3(4)    |
| C(17)-N(4)-C(16)-C(15)  | -153.9(3) |
| C(9)-N(3)-C(16)-N(4)    | -154.5(2) |
| B(1)-N(3)-C(16)-N(4)    | 15.8(4)   |
| C(9)-N(3)-C(16)-C(15)   | 11.5(3)   |
| B(1)-N(3)-C(16)-C(15)   | -178.2(2) |
| C(14)-C(15)-C(16)-N(4)  | -19.9(5)  |

|                         |             |
|-------------------------|-------------|
| C(10)-C(15)-C(16)-N(4)  | 156.4(3)    |
| C(14)-C(15)-C(16)-N(3)  | 175.5(3)    |
| C(10)-C(15)-C(16)-N(3)  | -8.1(3)     |
| C(16)-N(4)-C(17)-N(5)   | -9.9(4)     |
| C(16)-N(4)-C(17)-C(18)  | 152.4(3)    |
| C(24)-N(5)-C(17)-N(4)   | 154.1(2)    |
| B(1)-N(5)-C(17)-N(4)    | -12.5(4)    |
| C(24)-N(5)-C(17)-C(18)  | -11.8(3)    |
| B(1)-N(5)-C(17)-C(18)   | -178.4(2)   |
| N(4)-C(17)-C(18)-C(19)  | 16.4(5)     |
| N(5)-C(17)-C(18)-C(19)  | -179.1(3)   |
| N(4)-C(17)-C(18)-C(23)  | -157.1(3)   |
| N(5)-C(17)-C(18)-C(23)  | 7.4(3)      |
| C(23)-C(18)-C(19)-C(20) | -0.7(4)     |
| C(17)-C(18)-C(19)-C(20) | -173.5(3)   |
| C(18)-C(19)-C(20)-C(21) | 0.4(4)      |
| C(18)-C(19)-C(20)-Cl(5) | 178.71(19)  |
| C(19)-C(20)-C(21)-C(22) | 0.3(4)      |
| Cl(5)-C(20)-C(21)-C(22) | -178.0(2)   |
| C(19)-C(20)-C(21)-Cl(6) | 177.7(2)    |
| Cl(5)-C(20)-C(21)-Cl(6) | -0.6(3)     |
| C(20)-C(21)-C(22)-C(23) | -0.7(4)     |
| Cl(6)-C(21)-C(22)-C(23) | -178.18(18) |
| C(21)-C(22)-C(23)-C(18) | 0.4(4)      |
| C(21)-C(22)-C(23)-C(24) | 174.7(2)    |
| C(19)-C(18)-C(23)-C(22) | 0.3(4)      |
| C(17)-C(18)-C(23)-C(22) | 174.7(2)    |
| C(19)-C(18)-C(23)-C(24) | -175.3(2)   |
| C(17)-C(18)-C(23)-C(24) | -0.9(3)     |
| C(1)-N(6)-C(24)-N(5)    | 8.6(3)      |
| C(1)-N(6)-C(24)-C(23)   | -155.7(2)   |
| C(17)-N(5)-C(24)-N(6)   | -156.3(2)   |
| B(1)-N(5)-C(24)-N(6)    | 10.1(4)     |
| C(17)-N(5)-C(24)-C(23)  | 11.3(3)     |
| B(1)-N(5)-C(24)-C(23)   | 177.6(2)    |
| C(22)-C(23)-C(24)-N(6)  | -14.5(4)    |

|                         |           |
|-------------------------|-----------|
| C(18)-C(23)-C(24)-N(6)  | 160.4(2)  |
| C(22)-C(23)-C(24)-N(5)  | 179.2(2)  |
| C(18)-C(23)-C(24)-N(5)  | -5.9(3)   |
| B(1)-O(1)-C(25)-C(30)   | -83.4(3)  |
| B(1)-O(1)-C(25)-C(26)   | 99.4(3)   |
| O(1)-C(25)-C(26)-C(27)  | 177.7(2)  |
| C(30)-C(25)-C(26)-C(27) | 0.5(4)    |
| C(25)-C(26)-C(27)-C(28) | 0.1(5)    |
| C(26)-C(27)-C(28)-C(29) | 0.1(5)    |
| C(27)-C(28)-C(29)-C(30) | -0.9(5)   |
| O(1)-C(25)-C(30)-C(29)  | -178.4(2) |
| C(26)-C(25)-C(30)-C(29) | -1.3(4)   |
| C(28)-C(29)-C(30)-C(25) | 1.4(4)    |
| C(25)-O(1)-B(1)-N(3)    | -162.5(2) |
| C(25)-O(1)-B(1)-N(1)    | 79.8(3)   |
| C(25)-O(1)-B(1)-N(5)    | -44.2(3)  |
| C(9)-N(3)-B(1)-O(1)     | -97.4(3)  |
| C(16)-N(3)-B(1)-O(1)    | 93.2(3)   |
| C(9)-N(3)-B(1)-N(1)     | 28.8(3)   |
| C(16)-N(3)-B(1)-N(1)    | -140.6(2) |
| C(9)-N(3)-B(1)-N(5)     | 136.8(2)  |
| C(16)-N(3)-B(1)-N(5)    | -32.6(3)  |
| C(8)-N(1)-B(1)-O(1)     | 89.7(3)   |
| C(1)-N(1)-B(1)-O(1)     | -102.0(3) |
| C(8)-N(1)-B(1)-N(3)     | -31.1(3)  |
| C(1)-N(1)-B(1)-N(3)     | 137.2(2)  |
| C(8)-N(1)-B(1)-N(5)     | -139.8(2) |
| C(1)-N(1)-B(1)-N(5)     | 28.5(3)   |
| C(17)-N(5)-B(1)-O(1)    | -90.0(3)  |
| C(24)-N(5)-B(1)-O(1)    | 104.9(3)  |
| C(17)-N(5)-B(1)-N(3)    | 31.1(3)   |
| C(24)-N(5)-B(1)-N(3)    | -134.1(2) |
| C(17)-N(5)-B(1)-N(1)    | 139.1(2)  |
| C(24)-N(5)-B(1)-N(1)    | -26.0(3)  |

---

Symmetry transformations used to generate equivalent atoms:

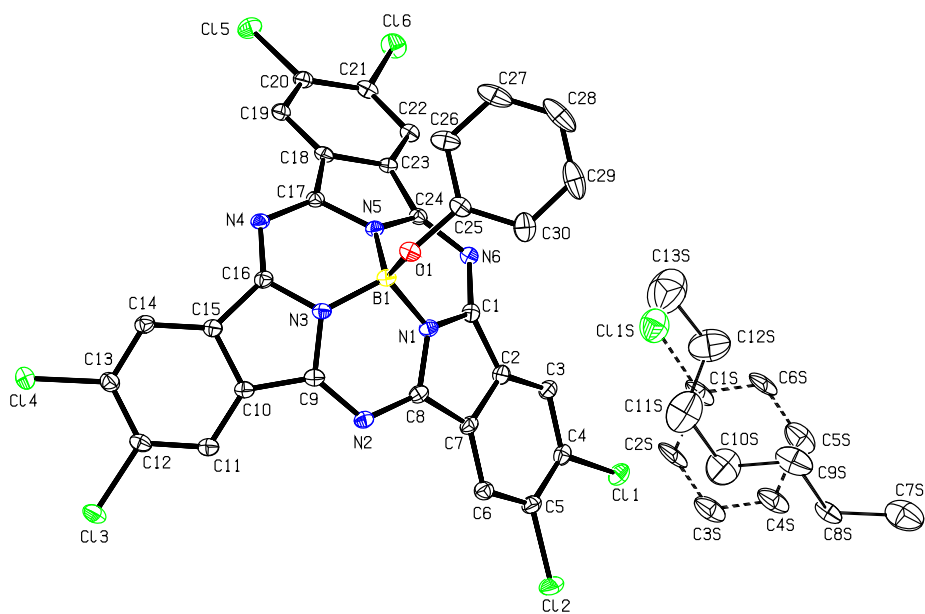

Figure S16: Anisotropic displacement ellipsoid plot of **PhO-Cl<sub>6</sub>BsubPc** (Chlorobenzene:Heptane; CCDC deposit **2087094**).

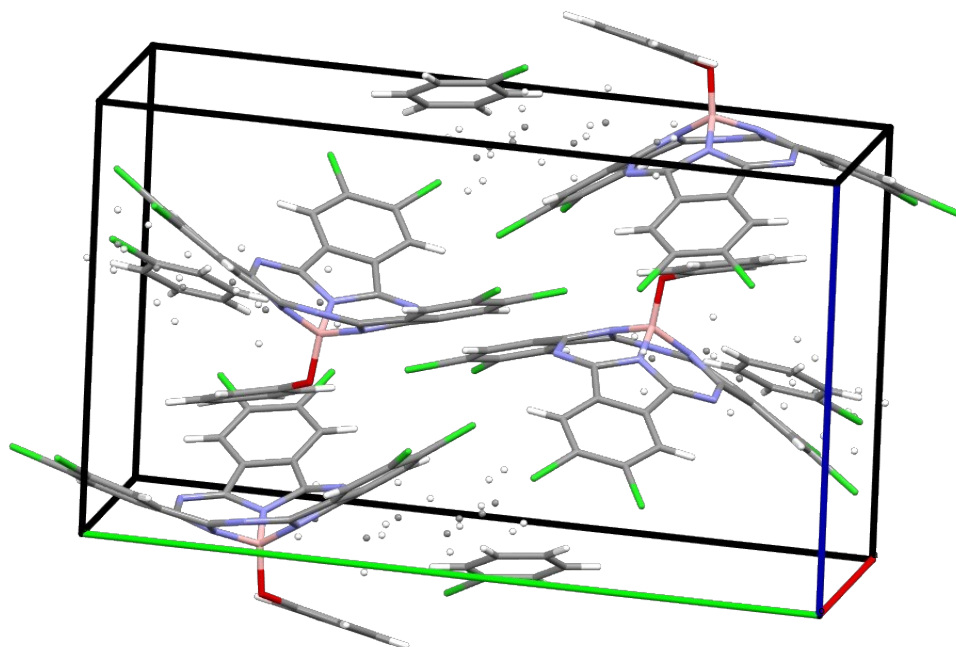

Figure S17: Populated unit cell of **PhO-Cl<sub>6</sub>BsubPc** (Chlorobenzene:Heptane; CCDC deposit 2087094).

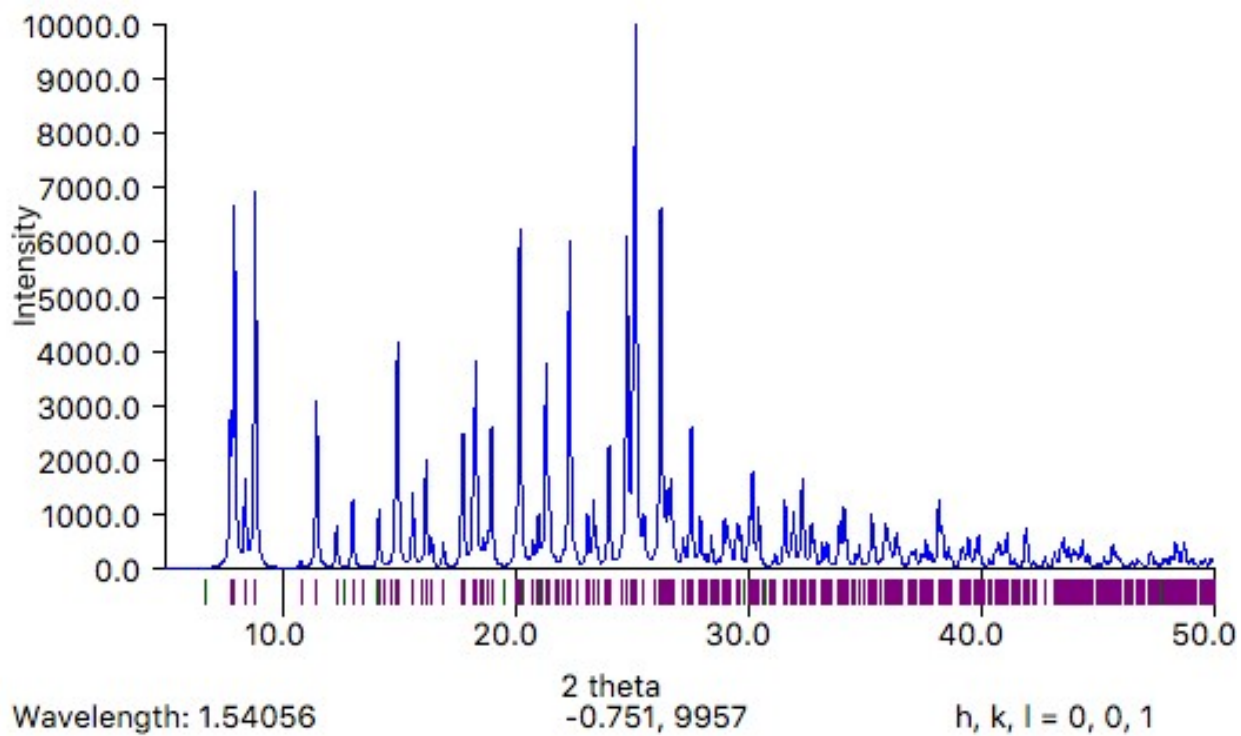

Figure S18: Powder x-ray diffraction **PhO-Cl<sub>6</sub>BsubPc** (Chlorobenzene:Heptane; CCDC deposit 2087094).

Table S 31. Crystal data and structure refinement for **PhO-Cl<sub>6</sub>BsubPc (Chlorobenzene:Heptane; CCDC deposit 2087094)**.

|                                   |                                                                             |                  |
|-----------------------------------|-----------------------------------------------------------------------------|------------------|
| Identification code               | d19160_a                                                                    |                  |
| Empirical formula                 | C <sub>36.71</sub> H <sub>23.76</sub> B Cl <sub>6.30</sub> N <sub>6</sub> O |                  |
| Formula weight                    | 798.80                                                                      |                  |
| Temperature                       | 150(2) K                                                                    |                  |
| Wavelength                        | 0.71073 Å                                                                   |                  |
| Crystal system                    | Monoclinic                                                                  |                  |
| Space group                       | P2 <sub>1</sub> /c                                                          |                  |
| Unit cell dimensions              | a = 12.5724(6) Å                                                            | a = 90°.         |
|                                   | b = 20.9451(10) Å                                                           | b = 115.589(2)°. |
|                                   | c = 14.5210(8) Å                                                            | γ = 90°.         |
| Volume                            | 3448.8(3) Å <sup>3</sup>                                                    |                  |
| Z                                 | 4                                                                           |                  |
| Density (calculated)              | 1.538 Mg/m <sup>3</sup>                                                     |                  |
| Absorption coefficient            | 0.564 mm <sup>-1</sup>                                                      |                  |
| F(000)                            | 1624                                                                        |                  |
| Crystal size                      | 0.320 x 0.100 x 0.100 mm <sup>3</sup>                                       |                  |
| Theta range for data collection   | 1.796 to 27.535°.                                                           |                  |
| Index ranges                      | -15 ≤ h ≤ 16, -27 ≤ k ≤ 27, -18 ≤ l ≤ 9                                     |                  |
| Reflections collected             | 51213                                                                       |                  |
| Independent reflections           | 7945 [R(int) = 0.0685]                                                      |                  |
| Completeness to theta = 25.242°   | 100.0 %                                                                     |                  |
| Absorption correction             | Semi-empirical from equivalents                                             |                  |
| Max. and min. transmission        | 0.7456 and 0.6935                                                           |                  |
| Refinement method                 | Full-matrix least-squares on F <sup>2</sup>                                 |                  |
| Data / restraints / parameters    | 7945 / 80 / 512                                                             |                  |
| Goodness-of-fit on F <sup>2</sup> | 1.068                                                                       |                  |
| Final R indices [I > 2σ(I)]       | R1 = 0.0506, wR2 = 0.1209                                                   |                  |
| R indices (all data)              | R1 = 0.1119, wR2 = 0.1607                                                   |                  |
| Extinction coefficient            | n/a                                                                         |                  |
| Largest diff. peak and hole       | 0.978 and -0.511 e.Å <sup>-3</sup>                                          |                  |

Table S 32. Atomic coordinates ( $\times 10^4$ ) and equivalent isotropic displacement parameters ( $\text{\AA}^2 \times 10^3$ ) for **PhO-Cl<sub>6</sub>BsubPc (Chlorobenzene:Heptane; CCDC deposit 2087094)**. U(eq) is defined as one third of the trace of the orthogonalized  $U^{ij}$  tensor.

|       | x        | y       | z       | U(eq) |
|-------|----------|---------|---------|-------|
| Cl(1) | 3565(1)  | 9971(1) | 7979(1) | 34(1) |
| Cl(2) | 1193(1)  | 9281(1) | 7552(1) | 40(1) |
| Cl(3) | 791(1)   | 4576(1) | 6557(1) | 37(1) |
| Cl(4) | 2860(1)  | 3821(1) | 6414(1) | 45(1) |
| Cl(5) | 10159(1) | 6085(1) | 7546(1) | 38(1) |
| Cl(6) | 10382(1) | 7568(1) | 7878(1) | 40(1) |
| O(1)  | 3293(2)  | 7233(1) | 3597(2) | 26(1) |
| N(1)  | 3419(2)  | 7664(1) | 5250(2) | 22(1) |
| N(2)  | 1894(2)  | 7074(1) | 5419(2) | 24(1) |
| N(3)  | 3259(2)  | 6553(1) | 4936(2) | 21(1) |
| N(4)  | 5028(2)  | 5963(1) | 5346(2) | 22(1) |
| N(5)  | 5034(2)  | 7094(1) | 5268(2) | 21(1) |
| N(6)  | 5331(2)  | 8138(1) | 5973(2) | 23(1) |
| C(1)  | 4182(3)  | 8147(2) | 5760(2) | 23(1) |
| C(2)  | 3559(3)  | 8531(2) | 6204(3) | 25(1) |
| C(3)  | 3891(3)  | 9078(2) | 6804(3) | 25(1) |
| C(4)  | 3148(3)  | 9299(2) | 7208(3) | 26(1) |
| C(5)  | 2096(3)  | 8986(2) | 7027(3) | 27(1) |
| C(6)  | 1768(3)  | 8431(2) | 6455(3) | 26(1) |
| C(7)  | 2503(3)  | 8205(2) | 6038(2) | 24(1) |
| C(8)  | 2481(3)  | 7621(2) | 5487(2) | 23(1) |
| C(9)  | 2348(3)  | 6538(2) | 5208(2) | 23(1) |
| C(10) | 2232(3)  | 5880(2) | 5457(2) | 23(1) |
| C(11) | 1489(3)  | 5587(2) | 5808(3) | 26(1) |
| C(12) | 1688(3)  | 4950(2) | 6095(3) | 27(1) |
| C(13) | 2618(3)  | 4614(2) | 6033(3) | 28(1) |
| C(14) | 3373(3)  | 4898(2) | 5694(3) | 26(1) |
| C(15) | 3183(3)  | 5537(2) | 5408(2) | 23(1) |
| C(16) | 3883(3)  | 5993(2) | 5154(2) | 22(1) |
| C(17) | 5600(3)  | 6520(2) | 5464(2) | 21(1) |

|        |          |          |          |        |
|--------|----------|----------|----------|--------|
| C(18)  | 6851(3)  | 6667(2)  | 6024(2)  | 22(1)  |
| C(19)  | 7848(3)  | 6278(2)  | 6438(3)  | 25(1)  |
| C(20)  | 8923(3)  | 6565(2)  | 7013(3)  | 26(1)  |
| C(21)  | 9017(3)  | 7229(2)  | 7193(3)  | 26(1)  |
| C(22)  | 8029(3)  | 7616(2)  | 6813(2)  | 24(1)  |
| C(23)  | 6939(3)  | 7334(2)  | 6219(2)  | 22(1)  |
| C(24)  | 5743(3)  | 7591(2)  | 5772(2)  | 21(1)  |
| C(25)  | 3879(3)  | 7678(2)  | 3285(2)  | 26(1)  |
| C(26)  | 4867(3)  | 7489(2)  | 3159(3)  | 38(1)  |
| C(27)  | 5485(4)  | 7929(3)  | 2879(3)  | 54(1)  |
| C(28)  | 5116(5)  | 8554(3)  | 2706(3)  | 63(2)  |
| C(29)  | 4129(5)  | 8737(2)  | 2811(3)  | 59(1)  |
| C(30)  | 3484(4)  | 8299(2)  | 3097(3)  | 41(1)  |
| B(1)   | 3722(3)  | 7151(2)  | 4679(3)  | 23(1)  |
| Cl(1S) | 2915(6)  | 9763(3)  | 4147(5)  | 69(2)  |
| C(1S)  | 2305(9)  | 10307(4) | 4680(9)  | 53(3)  |
| C(2S)  | 1467(9)  | 10106(4) | 5002(9)  | 52(3)  |
| C(3S)  | 953(8)   | 10545(5) | 5406(8)  | 56(3)  |
| C(4S)  | 1277(9)  | 11184(5) | 5488(9)  | 56(3)  |
| C(5S)  | 2115(9)  | 11385(4) | 5166(9)  | 61(3)  |
| C(6S)  | 2630(9)  | 10947(4) | 4762(8)  | 47(3)  |
| C(7S)  | 1116(8)  | 12474(3) | 5331(6)  | 80(3)  |
| C(8S)  | 1285(4)  | 11756(2) | 5620(4)  | 32(1)  |
| C(9S)  | 1593(7)  | 11317(4) | 5023(6)  | 64(2)  |
| C(10S) | 1583(9)  | 10648(4) | 5271(6)  | 84(3)  |
| C(11S) | 1941(7)  | 10159(5) | 4667(7)  | 84(3)  |
| C(12S) | 3120(9)  | 10387(5) | 4674(8)  | 95(3)  |
| C(13S) | 3536(17) | 9880(7)  | 4163(12) | 135(6) |

---



Table S 33. Bond lengths [ $\text{\AA}$ ] and angles [ $^\circ$ ] for **PhO-Cl<sub>6</sub>BsubPc (Chlorobenzene:Heptane; CCDC deposit 2087094)**.

---

|             |          |
|-------------|----------|
| Cl(1)-C(4)  | 1.733(3) |
| Cl(2)-C(5)  | 1.733(3) |
| Cl(3)-C(12) | 1.730(3) |
| Cl(4)-C(13) | 1.734(4) |
| Cl(5)-C(20) | 1.727(3) |
| Cl(6)-C(21) | 1.721(3) |
| O(1)-C(25)  | 1.379(4) |
| O(1)-B(1)   | 1.434(4) |
| N(1)-C(8)   | 1.366(4) |
| N(1)-C(1)   | 1.371(4) |
| N(1)-B(1)   | 1.504(4) |
| N(2)-C(8)   | 1.343(4) |
| N(2)-C(9)   | 1.352(4) |
| N(3)-C(9)   | 1.363(4) |
| N(3)-C(16)  | 1.370(4) |
| N(3)-B(1)   | 1.494(5) |
| N(4)-C(17)  | 1.342(4) |
| N(4)-C(16)  | 1.344(4) |
| N(5)-C(24)  | 1.360(4) |
| N(5)-C(17)  | 1.362(4) |
| N(5)-B(1)   | 1.500(4) |
| N(6)-C(24)  | 1.340(4) |
| N(6)-C(1)   | 1.341(4) |
| C(1)-C(2)   | 1.454(5) |
| C(2)-C(3)   | 1.390(5) |
| C(2)-C(7)   | 1.417(5) |
| C(3)-C(4)   | 1.380(5) |
| C(3)-H(3A)  | 0.9500   |
| C(4)-C(5)   | 1.395(5) |
| C(5)-C(6)   | 1.384(5) |
| C(6)-C(7)   | 1.389(5) |
| C(6)-H(6A)  | 0.9500   |

|              |           |
|--------------|-----------|
| C(7)-C(8)    | 1.455(5)  |
| C(9)-C(10)   | 1.448(5)  |
| C(10)-C(11)  | 1.386(5)  |
| C(10)-C(15)  | 1.422(5)  |
| C(11)-C(12)  | 1.387(5)  |
| C(11)-H(11A) | 0.9500    |
| C(12)-C(13)  | 1.400(5)  |
| C(13)-C(14)  | 1.379(5)  |
| C(14)-C(15)  | 1.391(5)  |
| C(14)-H(14A) | 0.9500    |
| C(15)-C(16)  | 1.452(5)  |
| C(17)-C(18)  | 1.459(4)  |
| C(18)-C(19)  | 1.395(5)  |
| C(18)-C(23)  | 1.421(5)  |
| C(19)-C(20)  | 1.381(5)  |
| C(19)-H(19A) | 0.9500    |
| C(20)-C(21)  | 1.411(5)  |
| C(21)-C(22)  | 1.383(5)  |
| C(22)-C(23)  | 1.396(5)  |
| C(22)-H(22A) | 0.9500    |
| C(23)-C(24)  | 1.458(4)  |
| C(25)-C(30)  | 1.376(5)  |
| C(25)-C(26)  | 1.389(5)  |
| C(26)-C(27)  | 1.376(6)  |
| C(26)-H(26A) | 0.9500    |
| C(27)-C(28)  | 1.377(8)  |
| C(27)-H(27A) | 0.9500    |
| C(28)-C(29)  | 1.368(8)  |
| C(28)-H(28A) | 0.9500    |
| C(29)-C(30)  | 1.400(6)  |
| C(29)-H(29A) | 0.9500    |
| C(30)-H(30A) | 0.9500    |
| Cl(1S)-C(1S) | 1.732(11) |
| C(1S)-C(2S)  | 1.3900    |
| C(1S)-C(6S)  | 1.3900    |
| C(2S)-C(3S)  | 1.3900    |

|                 |           |
|-----------------|-----------|
| C(2S)-H(2SA)    | 0.9500    |
| C(3S)-C(4S)     | 1.3900    |
| C(3S)-H(3SA)    | 0.9500    |
| C(4S)-C(5S)     | 1.3900    |
| C(4S)-H(4SA)    | 0.9500    |
| C(5S)-C(6S)     | 1.3900    |
| C(5S)-H(5SA)    | 0.9500    |
| C(6S)-H(6SA)    | 0.9500    |
| C(7S)-C(8S)     | 1.551(7)  |
| C(7S)-H(7SA)    | 0.9800    |
| C(7S)-H(7SB)    | 0.9800    |
| C(7S)-H(7SC)    | 0.9800    |
| C(8S)-C(9S)     | 1.427(9)  |
| C(8S)-H(8SA)    | 0.9900    |
| C(8S)-H(8SB)    | 0.9900    |
| C(9S)-C(10S)    | 1.450(12) |
| C(9S)-H(9SA)    | 0.9900    |
| C(9S)-H(9SB)    | 0.9900    |
| C(10S)-C(11S)   | 1.536(8)  |
| C(10S)-H(10A)   | 0.9900    |
| C(10S)-H(10B)   | 0.9900    |
| C(11S)-C(12S)   | 1.553(8)  |
| C(11S)-H(11B)   | 0.9900    |
| C(11S)-H(11C)   | 0.9900    |
| C(12S)-C(13S)   | 1.511(9)  |
| C(12S)-H(12A)   | 0.9900    |
| C(12S)-H(12B)   | 0.9900    |
| C(13S)-H(13A)   | 0.9800    |
| C(13S)-H(13B)   | 0.9800    |
| C(13S)-H(13C)   | 0.9800    |
| C(25)-O(1)-B(1) | 116.1(3)  |
| C(8)-N(1)-C(1)  | 113.0(3)  |
| C(8)-N(1)-B(1)  | 122.9(3)  |
| C(1)-N(1)-B(1)  | 122.7(3)  |
| C(8)-N(2)-C(9)  | 116.9(3)  |

|                   |          |
|-------------------|----------|
| C(9)-N(3)-C(16)   | 112.5(3) |
| C(9)-N(3)-B(1)    | 123.9(3) |
| C(16)-N(3)-B(1)   | 121.9(3) |
| C(17)-N(4)-C(16)  | 116.9(3) |
| C(24)-N(5)-C(17)  | 113.7(3) |
| C(24)-N(5)-B(1)   | 123.3(3) |
| C(17)-N(5)-B(1)   | 122.4(3) |
| C(24)-N(6)-C(1)   | 116.2(3) |
| N(6)-C(1)-N(1)    | 123.1(3) |
| N(6)-C(1)-C(2)    | 129.8(3) |
| N(1)-C(1)-C(2)    | 105.2(3) |
| C(3)-C(2)-C(7)    | 120.7(3) |
| C(3)-C(2)-C(1)    | 131.3(3) |
| C(7)-C(2)-C(1)    | 107.6(3) |
| C(4)-C(3)-C(2)    | 117.9(3) |
| C(4)-C(3)-H(3A)   | 121.1    |
| C(2)-C(3)-H(3A)   | 121.1    |
| C(3)-C(4)-C(5)    | 121.5(3) |
| C(3)-C(4)-Cl(1)   | 118.4(3) |
| C(5)-C(4)-Cl(1)   | 120.1(3) |
| C(6)-C(5)-C(4)    | 121.4(3) |
| C(6)-C(5)-Cl(2)   | 118.8(3) |
| C(4)-C(5)-Cl(2)   | 119.8(3) |
| C(5)-C(6)-C(7)    | 117.8(3) |
| C(5)-C(6)-H(6A)   | 121.1    |
| C(7)-C(6)-H(6A)   | 121.1    |
| C(6)-C(7)-C(2)    | 120.7(3) |
| C(6)-C(7)-C(8)    | 131.9(3) |
| C(2)-C(7)-C(8)    | 107.1(3) |
| N(2)-C(8)-N(1)    | 123.0(3) |
| N(2)-C(8)-C(7)    | 129.6(3) |
| N(1)-C(8)-C(7)    | 105.6(3) |
| N(2)-C(9)-N(3)    | 122.4(3) |
| N(2)-C(9)-C(10)   | 129.4(3) |
| N(3)-C(9)-C(10)   | 106.3(3) |
| C(11)-C(10)-C(15) | 120.5(3) |

|                    |          |
|--------------------|----------|
| C(11)-C(10)-C(9)   | 132.1(3) |
| C(15)-C(10)-C(9)   | 107.0(3) |
| C(10)-C(11)-C(12)  | 118.3(3) |
| C(10)-C(11)-H(11A) | 120.8    |
| C(12)-C(11)-H(11A) | 120.8    |
| C(11)-C(12)-C(13)  | 120.8(3) |
| C(11)-C(12)-Cl(3)  | 119.3(3) |
| C(13)-C(12)-Cl(3)  | 119.9(3) |
| C(14)-C(13)-C(12)  | 121.9(3) |
| C(14)-C(13)-Cl(4)  | 118.2(3) |
| C(12)-C(13)-Cl(4)  | 119.9(3) |
| C(13)-C(14)-C(15)  | 117.7(3) |
| C(13)-C(14)-H(14A) | 121.1    |
| C(15)-C(14)-H(14A) | 121.1    |
| C(14)-C(15)-C(10)  | 120.8(3) |
| C(14)-C(15)-C(16)  | 131.7(3) |
| C(10)-C(15)-C(16)  | 107.1(3) |
| N(4)-C(16)-N(3)    | 122.9(3) |
| N(4)-C(16)-C(15)   | 129.0(3) |
| N(3)-C(16)-C(15)   | 105.8(3) |
| N(4)-C(17)-N(5)    | 122.5(3) |
| N(4)-C(17)-C(18)   | 130.1(3) |
| N(5)-C(17)-C(18)   | 105.7(3) |
| C(19)-C(18)-C(23)  | 120.7(3) |
| C(19)-C(18)-C(17)  | 132.0(3) |
| C(23)-C(18)-C(17)  | 106.9(3) |
| C(20)-C(19)-C(18)  | 118.0(3) |
| C(20)-C(19)-H(19A) | 121.0    |
| C(18)-C(19)-H(19A) | 121.0    |
| C(19)-C(20)-C(21)  | 121.5(3) |
| C(19)-C(20)-Cl(5)  | 118.3(3) |
| C(21)-C(20)-Cl(5)  | 120.2(3) |
| C(22)-C(21)-C(20)  | 121.0(3) |
| C(22)-C(21)-Cl(6)  | 119.3(3) |
| C(20)-C(21)-Cl(6)  | 119.7(3) |
| C(21)-C(22)-C(23)  | 118.2(3) |

|                    |          |
|--------------------|----------|
| C(21)-C(22)-H(22A) | 120.9    |
| C(23)-C(22)-H(22A) | 120.9    |
| C(22)-C(23)-C(18)  | 120.6(3) |
| C(22)-C(23)-C(24)  | 131.9(3) |
| C(18)-C(23)-C(24)  | 107.3(3) |
| N(6)-C(24)-N(5)    | 123.1(3) |
| N(6)-C(24)-C(23)   | 129.7(3) |
| N(5)-C(24)-C(23)   | 105.5(3) |
| C(30)-C(25)-O(1)   | 120.4(3) |
| C(30)-C(25)-C(26)  | 120.6(4) |
| O(1)-C(25)-C(26)   | 119.0(3) |
| C(27)-C(26)-C(25)  | 120.0(4) |
| C(27)-C(26)-H(26A) | 120.0    |
| C(25)-C(26)-H(26A) | 120.0    |
| C(26)-C(27)-C(28)  | 120.1(5) |
| C(26)-C(27)-H(27A) | 119.9    |
| C(28)-C(27)-H(27A) | 119.9    |
| C(29)-C(28)-C(27)  | 119.7(4) |
| C(29)-C(28)-H(28A) | 120.1    |
| C(27)-C(28)-H(28A) | 120.1    |
| C(28)-C(29)-C(30)  | 121.2(5) |
| C(28)-C(29)-H(29A) | 119.4    |
| C(30)-C(29)-H(29A) | 119.4    |
| C(25)-C(30)-C(29)  | 118.3(4) |
| C(25)-C(30)-H(30A) | 120.9    |
| C(29)-C(30)-H(30A) | 120.9    |
| O(1)-B(1)-N(3)     | 111.8(3) |
| O(1)-B(1)-N(5)     | 115.8(3) |
| N(3)-B(1)-N(5)     | 104.0(3) |
| O(1)-B(1)-N(1)     | 117.0(3) |
| N(3)-B(1)-N(1)     | 104.0(3) |
| N(5)-B(1)-N(1)     | 102.7(3) |
| C(2S)-C(1S)-C(6S)  | 120.0    |
| C(2S)-C(1S)-Cl(1S) | 119.8(3) |
| C(6S)-C(1S)-Cl(1S) | 120.2(3) |
| C(3S)-C(2S)-C(1S)  | 120.0    |

|                      |          |
|----------------------|----------|
| C(3S)-C(2S)-H(2SA)   | 120.0    |
| C(1S)-C(2S)-H(2SA)   | 120.0    |
| C(4S)-C(3S)-C(2S)    | 120.0    |
| C(4S)-C(3S)-H(3SA)   | 120.0    |
| C(2S)-C(3S)-H(3SA)   | 120.0    |
| C(5S)-C(4S)-C(3S)    | 120.0    |
| C(5S)-C(4S)-H(4SA)   | 120.0    |
| C(3S)-C(4S)-H(4SA)   | 120.0    |
| C(4S)-C(5S)-C(6S)    | 120.0    |
| C(4S)-C(5S)-H(5SA)   | 120.0    |
| C(6S)-C(5S)-H(5SA)   | 120.0    |
| C(5S)-C(6S)-C(1S)    | 120.0    |
| C(5S)-C(6S)-H(6SA)   | 120.0    |
| C(1S)-C(6S)-H(6SA)   | 120.0    |
| C(8S)-C(7S)-H(7SA)   | 109.5    |
| C(8S)-C(7S)-H(7SB)   | 109.5    |
| H(7SA)-C(7S)-H(7SB)  | 109.5    |
| C(8S)-C(7S)-H(7SC)   | 109.5    |
| H(7SA)-C(7S)-H(7SC)  | 109.5    |
| H(7SB)-C(7S)-H(7SC)  | 109.5    |
| C(9S)-C(8S)-C(7S)    | 120.0(6) |
| C(9S)-C(8S)-H(8SA)   | 107.3    |
| C(7S)-C(8S)-H(8SA)   | 107.3    |
| C(9S)-C(8S)-H(8SB)   | 107.3    |
| C(7S)-C(8S)-H(8SB)   | 107.3    |
| H(8SA)-C(8S)-H(8SB)  | 106.9    |
| C(8S)-C(9S)-C(10S)   | 115.9(7) |
| C(8S)-C(9S)-H(9SA)   | 108.3    |
| C(10S)-C(9S)-H(9SA)  | 108.3    |
| C(8S)-C(9S)-H(9SB)   | 108.3    |
| C(10S)-C(9S)-H(9SB)  | 108.3    |
| H(9SA)-C(9S)-H(9SB)  | 107.4    |
| C(9S)-C(10S)-C(11S)  | 117.8(8) |
| C(9S)-C(10S)-H(10A)  | 107.9    |
| C(11S)-C(10S)-H(10A) | 107.9    |
| C(9S)-C(10S)-H(10B)  | 107.9    |

|                      |           |
|----------------------|-----------|
| C(11S)-C(10S)-H(10B) | 107.9     |
| H(10A)-C(10S)-H(10B) | 107.2     |
| C(10S)-C(11S)-C(12S) | 107.8(7)  |
| C(10S)-C(11S)-H(11B) | 110.1     |
| C(12S)-C(11S)-H(11B) | 110.1     |
| C(10S)-C(11S)-H(11C) | 110.1     |
| C(12S)-C(11S)-H(11C) | 110.1     |
| H(11B)-C(11S)-H(11C) | 108.5     |
| C(13S)-C(12S)-C(11S) | 108.2(10) |
| C(13S)-C(12S)-H(12A) | 110.1     |
| C(11S)-C(12S)-H(12A) | 110.1     |
| C(13S)-C(12S)-H(12B) | 110.1     |
| C(11S)-C(12S)-H(12B) | 110.1     |
| H(12A)-C(12S)-H(12B) | 108.4     |
| C(12S)-C(13S)-H(13A) | 109.5     |
| C(12S)-C(13S)-H(13B) | 109.5     |
| H(13A)-C(13S)-H(13B) | 109.5     |
| C(12S)-C(13S)-H(13C) | 109.5     |
| H(13A)-C(13S)-H(13C) | 109.5     |
| H(13B)-C(13S)-H(13C) | 109.5     |

---

Symmetry transformations used to generate equivalent atoms:



Table S 34. Anisotropic displacement parameters ( $\text{\AA}^2 \times 10^3$ ) for **PhO-Cl<sub>6</sub>BsubPc (Chlorobenzene:Heptane; CCDC deposit 2087094)**. The anisotropic displacement factor exponent takes the form:  $-2p^2 [ h^2 a^* U^{11} + \dots + 2 h k a^* b^* U^{12} ]$

|       | U <sup>11</sup> | U <sup>22</sup> | U <sup>33</sup> | U <sup>23</sup> | U <sup>13</sup> | U <sup>12</sup> |
|-------|-----------------|-----------------|-----------------|-----------------|-----------------|-----------------|
| Cl(1) | 39(1)           | 28(1)           | 36(1)           | -8(1)           | 18(1)           | 3(1)            |
| Cl(2) | 43(1)           | 40(1)           | 48(1)           | -8(1)           | 31(1)           | 4(1)            |
| Cl(3) | 35(1)           | 40(1)           | 45(1)           | 2(1)            | 26(1)           | -7(1)           |
| Cl(4) | 49(1)           | 29(1)           | 69(1)           | 10(1)           | 37(1)           | 2(1)            |
| Cl(5) | 24(1)           | 42(1)           | 47(1)           | 4(1)            | 14(1)           | 8(1)            |
| Cl(6) | 25(1)           | 45(1)           | 40(1)           | -2(1)           | 6(1)            | -8(1)           |
| O(1)  | 24(1)           | 31(1)           | 19(1)           | -3(1)           | 8(1)            | -4(1)           |
| N(1)  | 21(1)           | 25(1)           | 20(1)           | -2(1)           | 9(1)            | 1(1)            |
| N(2)  | 20(1)           | 27(2)           | 23(1)           | 0(1)            | 9(1)            | 3(1)            |
| N(3)  | 18(1)           | 25(1)           | 22(1)           | -4(1)           | 10(1)           | -2(1)           |
| N(4)  | 24(1)           | 23(1)           | 24(1)           | -4(1)           | 15(1)           | -1(1)           |
| N(5)  | 20(1)           | 22(1)           | 21(1)           | -2(1)           | 11(1)           | 0(1)            |
| N(6)  | 24(2)           | 23(1)           | 25(1)           | 1(1)            | 13(1)           | 1(1)            |
| C(1)  | 27(2)           | 22(2)           | 18(2)           | 0(1)            | 9(1)            | 0(1)            |
| C(2)  | 25(2)           | 23(2)           | 24(2)           | 2(1)            | 10(1)           | 2(1)            |
| C(3)  | 28(2)           | 24(2)           | 25(2)           | 1(1)            | 12(2)           | 5(1)            |
| C(4)  | 33(2)           | 22(2)           | 22(2)           | 1(1)            | 10(2)           | 5(1)            |
| C(5)  | 30(2)           | 28(2)           | 25(2)           | 2(1)            | 15(2)           | 7(1)            |
| C(6)  | 27(2)           | 29(2)           | 25(2)           | 2(1)            | 12(2)           | 3(1)            |
| C(7)  | 22(2)           | 24(2)           | 22(2)           | 3(1)            | 8(1)            | 7(1)            |
| C(8)  | 19(2)           | 27(2)           | 21(2)           | -1(1)           | 6(1)            | 3(1)            |
| C(9)  | 18(2)           | 30(2)           | 19(2)           | -3(1)           | 6(1)            | -1(1)           |
| C(10) | 20(2)           | 27(2)           | 22(2)           | -4(1)           | 10(1)           | -2(1)           |
| C(11) | 23(2)           | 31(2)           | 26(2)           | -4(2)           | 12(1)           | -2(1)           |
| C(12) | 24(2)           | 33(2)           | 25(2)           | -4(2)           | 12(2)           | -7(2)           |
| C(13) | 30(2)           | 27(2)           | 31(2)           | -2(2)           | 15(2)           | -4(1)           |
| C(14) | 24(2)           | 27(2)           | 28(2)           | -6(1)           | 12(2)           | -2(1)           |
| C(15) | 22(2)           | 24(2)           | 22(2)           | -7(1)           | 10(1)           | -5(1)           |
| C(16) | 25(2)           | 23(2)           | 21(2)           | -4(1)           | 11(1)           | -1(1)           |

|        |         |         |         |        |        |        |
|--------|---------|---------|---------|--------|--------|--------|
| C(17)  | 24(2)   | 23(2)   | 20(2)   | -2(1)  | 13(1)  | -1(1)  |
| C(18)  | 22(2)   | 27(2)   | 20(2)   | -2(1)  | 12(1)  | -4(1)  |
| C(19)  | 27(2)   | 25(2)   | 28(2)   | -1(1)  | 17(2)  | -1(1)  |
| C(20)  | 24(2)   | 31(2)   | 26(2)   | 3(1)   | 14(2)  | 1(1)   |
| C(21)  | 23(2)   | 35(2)   | 22(2)   | 1(1)   | 10(1)  | -6(1)  |
| C(22)  | 24(2)   | 26(2)   | 23(2)   | -1(1)  | 11(1)  | -3(1)  |
| C(23)  | 24(2)   | 25(2)   | 24(2)   | 0(1)   | 16(1)  | 1(1)   |
| C(24)  | 23(2)   | 22(2)   | 19(2)   | -3(1)  | 11(1)  | -3(1)  |
| C(25)  | 26(2)   | 34(2)   | 14(2)   | -1(1)  | 6(1)   | -5(1)  |
| C(26)  | 36(2)   | 60(3)   | 22(2)   | -10(2) | 16(2)  | -8(2)  |
| C(27)  | 52(3)   | 89(4)   | 30(2)   | -11(2) | 26(2)  | -26(3) |
| C(28)  | 73(4)   | 86(4)   | 26(2)   | 5(2)   | 17(2)  | -44(3) |
| C(29)  | 81(4)   | 44(3)   | 31(2)   | 13(2)  | 5(2)   | -18(2) |
| C(30)  | 43(2)   | 38(2)   | 29(2)   | 6(2)   | 3(2)   | 0(2)   |
| B(1)   | 21(2)   | 25(2)   | 22(2)   | -1(2)  | 10(2)  | 0(2)   |
| Cl(1S) | 74(4)   | 67(3)   | 58(3)   | 13(2)  | 21(3)  | 11(3)  |
| C(1S)  | 43(5)   | 74(6)   | 42(4)   | 32(4)  | 19(4)  | -6(4)  |
| C(2S)  | 41(5)   | 77(6)   | 41(5)   | 33(4)  | 20(4)  | -10(4) |
| C(3S)  | 42(5)   | 84(6)   | 43(5)   | 27(5)  | 18(4)  | -6(5)  |
| C(4S)  | 40(5)   | 87(6)   | 41(5)   | 28(5)  | 18(4)  | -5(5)  |
| C(5S)  | 46(5)   | 81(6)   | 43(5)   | 28(5)  | 8(4)   | -8(5)  |
| C(6S)  | 38(5)   | 72(6)   | 35(5)   | 31(4)  | 20(4)  | -3(4)  |
| C(7S)  | 93(6)   | 100(5)  | 63(5)   | -28(4) | 47(5)  | -32(5) |
| C(8S)  | 29(3)   | 49(3)   | 13(2)   | -12(2) | 5(2)   | -26(2) |
| C(9S)  | 54(5)   | 96(5)   | 40(4)   | -20(4) | 18(4)  | -35(4) |
| C(10S) | 110(8)  | 96(5)   | 44(4)   | 16(4)  | 32(5)  | 24(6)  |
| C(11S) | 68(5)   | 93(6)   | 50(5)   | -5(5)  | -13(4) | 14(5)  |
| C(12S) | 94(7)   | 120(8)  | 79(6)   | -21(6) | 45(6)  | 2(6)   |
| C(13S) | 188(17) | 111(11) | 117(11) | -1(9)  | 78(13) | 31(11) |

---

Table S 35. Hydrogen coordinates ( $\times 10^4$ ) and isotropic displacement parameters ( $\text{\AA}^2 \times 10^3$ ) for **PhO-Cl<sub>6</sub>BsubPc** (**Chlorobenzene:Heptane; CCDC deposit 2087094**).

|        | x    | y     | z    | U(eq) |
|--------|------|-------|------|-------|
| H(3A)  | 4606 | 9293  | 6931 | 30    |
| H(6A)  | 1063 | 8213  | 6350 | 32    |
| H(11A) | 860  | 5816  | 5851 | 31    |
| H(14A) | 4001 | 4665  | 5656 | 31    |
| H(19A) | 7790 | 5830  | 6327 | 30    |
| H(22A) | 8090 | 8061  | 6954 | 29    |
| H(26A) | 5115 | 7056  | 3266 | 46    |
| H(27A) | 6169 | 7800  | 2805 | 65    |
| H(28A) | 5544 | 8858  | 2515 | 76    |
| H(29A) | 3876 | 9169  | 2688 | 71    |
| H(30A) | 2793 | 8426  | 3159 | 50    |
| H(2SA) | 1245 | 9669  | 4946 | 62    |
| H(3SA) | 380  | 10407 | 5626 | 67    |
| H(4SA) | 926  | 11484 | 5764 | 67    |
| H(5SA) | 2337 | 11822 | 5222 | 73    |
| H(6SA) | 3203 | 11084 | 4542 | 56    |
| H(7SA) | 908  | 12705 | 5816 | 121   |
| H(7SB) | 1850 | 12647 | 5353 | 121   |
| H(7SC) | 482  | 12522 | 4640 | 121   |
| H(8SA) | 1902 | 11726 | 6331 | 38    |
| H(8SB) | 542  | 11602 | 5623 | 38    |
| H(9SA) | 2392 | 11427 | 5098 | 77    |
| H(9SB) | 1040 | 11379 | 4296 | 77    |
| H(10A) | 777  | 10539 | 5180 | 100   |
| H(10B) | 2117 | 10592 | 6004 | 100   |
| H(11B) | 1322 | 10130 | 3956 | 101   |
| H(11C) | 2043 | 9732  | 4986 | 101   |
| H(12A) | 3000 | 10796 | 4302 | 114   |
| H(12B) | 3718 | 10453 | 5385 | 114   |

|        |      |       |      |     |
|--------|------|-------|------|-----|
| H(13A) | 4281 | 10015 | 4160 | 202 |
| H(13B) | 3656 | 9478  | 4538 | 202 |
| H(13C) | 2941 | 9819  | 3459 | 202 |

---

Table S 36. Torsion angles [°] for **PhO-Cl<sub>6</sub>BsubPc (Chlorobenzene:Heptane; CCDC deposit 2087094)**.

---

|                       |           |
|-----------------------|-----------|
| C(24)-N(6)-C(1)-N(1)  | -7.9(4)   |
| C(24)-N(6)-C(1)-C(2)  | 154.0(3)  |
| C(8)-N(1)-C(1)-N(6)   | 153.2(3)  |
| B(1)-N(1)-C(1)-N(6)   | -14.1(5)  |
| C(8)-N(1)-C(1)-C(2)   | -12.4(4)  |
| B(1)-N(1)-C(1)-C(2)   | -179.7(3) |
| N(6)-C(1)-C(2)-C(3)   | 15.3(6)   |
| N(1)-C(1)-C(2)-C(3)   | 179.7(3)  |
| N(6)-C(1)-C(2)-C(7)   | -157.1(3) |
| N(1)-C(1)-C(2)-C(7)   | 7.2(3)    |
| C(7)-C(2)-C(3)-C(4)   | -1.5(5)   |
| C(1)-C(2)-C(3)-C(4)   | -173.1(3) |
| C(2)-C(3)-C(4)-C(5)   | 0.1(5)    |
| C(2)-C(3)-C(4)-Cl(1)  | 178.7(2)  |
| C(3)-C(4)-C(5)-C(6)   | 1.6(5)    |
| Cl(1)-C(4)-C(5)-C(6)  | -176.9(3) |
| C(3)-C(4)-C(5)-Cl(2)  | 180.0(3)  |
| Cl(1)-C(4)-C(5)-Cl(2) | 1.5(4)    |
| C(4)-C(5)-C(6)-C(7)   | -1.9(5)   |
| Cl(2)-C(5)-C(6)-C(7)  | 179.7(3)  |
| C(5)-C(6)-C(7)-C(2)   | 0.5(5)    |
| C(5)-C(6)-C(7)-C(8)   | 173.8(3)  |
| C(3)-C(2)-C(7)-C(6)   | 1.2(5)    |
| C(1)-C(2)-C(7)-C(6)   | 174.6(3)  |
| C(3)-C(2)-C(7)-C(8)   | -173.6(3) |
| C(1)-C(2)-C(7)-C(8)   | -0.2(4)   |
| C(9)-N(2)-C(8)-N(1)   | 7.1(5)    |
| C(9)-N(2)-C(8)-C(7)   | -155.2(3) |
| C(1)-N(1)-C(8)-N(2)   | -153.5(3) |
| B(1)-N(1)-C(8)-N(2)   | 13.8(5)   |
| C(1)-N(1)-C(8)-C(7)   | 12.4(4)   |
| B(1)-N(1)-C(8)-C(7)   | 179.6(3)  |
| C(6)-C(7)-C(8)-N(2)   | -16.4(6)  |

|                         |           |
|-------------------------|-----------|
| C(2)-C(7)-C(8)-N(2)     | 157.6(3)  |
| C(6)-C(7)-C(8)-N(1)     | 179.0(3)  |
| C(2)-C(7)-C(8)-N(1)     | -7.0(4)   |
| C(8)-N(2)-C(9)-N(3)     | -8.9(5)   |
| C(8)-N(2)-C(9)-C(10)    | 153.7(3)  |
| C(16)-N(3)-C(9)-N(2)    | 155.2(3)  |
| B(1)-N(3)-C(9)-N(2)     | -10.3(5)  |
| C(16)-N(3)-C(9)-C(10)   | -10.8(4)  |
| B(1)-N(3)-C(9)-C(10)    | -176.3(3) |
| N(2)-C(9)-C(10)-C(11)   | 13.0(6)   |
| N(3)-C(9)-C(10)-C(11)   | 177.7(3)  |
| N(2)-C(9)-C(10)-C(15)   | -159.3(3) |
| N(3)-C(9)-C(10)-C(15)   | 5.4(3)    |
| C(15)-C(10)-C(11)-C(12) | -0.9(5)   |
| C(9)-C(10)-C(11)-C(12)  | -172.4(3) |
| C(10)-C(11)-C(12)-C(13) | 0.2(5)    |
| C(10)-C(11)-C(12)-Cl(3) | 178.9(3)  |
| C(11)-C(12)-C(13)-C(14) | 0.3(5)    |
| Cl(3)-C(12)-C(13)-C(14) | -178.4(3) |
| C(11)-C(12)-C(13)-Cl(4) | 179.1(3)  |
| Cl(3)-C(12)-C(13)-Cl(4) | 0.4(4)    |
| C(12)-C(13)-C(14)-C(15) | -0.1(5)   |
| Cl(4)-C(13)-C(14)-C(15) | -178.9(3) |
| C(13)-C(14)-C(15)-C(10) | -0.6(5)   |
| C(13)-C(14)-C(15)-C(16) | 170.6(3)  |
| C(11)-C(10)-C(15)-C(14) | 1.2(5)    |
| C(9)-C(10)-C(15)-C(14)  | 174.6(3)  |
| C(11)-C(10)-C(15)-C(16) | -172.0(3) |
| C(9)-C(10)-C(15)-C(16)  | 1.3(4)    |
| C(17)-N(4)-C(16)-N(3)   | 9.4(4)    |
| C(17)-N(4)-C(16)-C(15)  | -151.0(3) |
| C(9)-N(3)-C(16)-N(4)    | -152.7(3) |
| B(1)-N(3)-C(16)-N(4)    | 13.2(5)   |
| C(9)-N(3)-C(16)-C(15)   | 11.6(4)   |
| B(1)-N(3)-C(16)-C(15)   | 177.4(3)  |
| C(14)-C(15)-C(16)-N(4)  | -16.7(6)  |

|                         |           |
|-------------------------|-----------|
| C(10)-C(15)-C(16)-N(4)  | 155.4(3)  |
| C(14)-C(15)-C(16)-N(3)  | -179.7(3) |
| C(10)-C(15)-C(16)-N(3)  | -7.5(3)   |
| C(16)-N(4)-C(17)-N(5)   | -8.6(4)   |
| C(16)-N(4)-C(17)-C(18)  | 154.4(3)  |
| C(24)-N(5)-C(17)-N(4)   | 156.6(3)  |
| B(1)-N(5)-C(17)-N(4)    | -14.8(5)  |
| C(24)-N(5)-C(17)-C(18)  | -10.0(3)  |
| B(1)-N(5)-C(17)-C(18)   | 178.7(3)  |
| N(4)-C(17)-C(18)-C(19)  | 13.9(6)   |
| N(5)-C(17)-C(18)-C(19)  | 179.0(3)  |
| N(4)-C(17)-C(18)-C(23)  | -159.3(3) |
| N(5)-C(17)-C(18)-C(23)  | 5.9(3)    |
| C(23)-C(18)-C(19)-C(20) | -2.0(5)   |
| C(17)-C(18)-C(19)-C(20) | -174.3(3) |
| C(18)-C(19)-C(20)-C(21) | 0.8(5)    |
| C(18)-C(19)-C(20)-Cl(5) | 178.9(2)  |
| C(19)-C(20)-C(21)-C(22) | 1.2(5)    |
| Cl(5)-C(20)-C(21)-C(22) | -176.8(3) |
| C(19)-C(20)-C(21)-Cl(6) | -177.8(3) |
| Cl(5)-C(20)-C(21)-Cl(6) | 4.2(4)    |
| C(20)-C(21)-C(22)-C(23) | -2.1(5)   |
| Cl(6)-C(21)-C(22)-C(23) | 176.9(2)  |
| C(21)-C(22)-C(23)-C(18) | 0.9(5)    |
| C(21)-C(22)-C(23)-C(24) | 175.1(3)  |
| C(19)-C(18)-C(23)-C(22) | 1.1(5)    |
| C(17)-C(18)-C(23)-C(22) | 175.2(3)  |
| C(19)-C(18)-C(23)-C(24) | -174.4(3) |
| C(17)-C(18)-C(23)-C(24) | -0.3(3)   |
| C(1)-N(6)-C(24)-N(5)    | 7.8(4)    |
| C(1)-N(6)-C(24)-C(23)   | -155.3(3) |
| C(17)-N(5)-C(24)-N(6)   | -156.8(3) |
| B(1)-N(5)-C(24)-N(6)    | 14.4(5)   |
| C(17)-N(5)-C(24)-C(23)  | 9.8(3)    |
| B(1)-N(5)-C(24)-C(23)   | -178.9(3) |
| C(22)-C(23)-C(24)-N(6)  | -14.8(6)  |

|                          |           |
|--------------------------|-----------|
| C(18)-C(23)-C(24)-N(6)   | 160.0(3)  |
| C(22)-C(23)-C(24)-N(5)   | 179.8(3)  |
| C(18)-C(23)-C(24)-N(5)   | -5.4(3)   |
| B(1)-O(1)-C(25)-C(30)    | -93.1(4)  |
| B(1)-O(1)-C(25)-C(26)    | 87.3(4)   |
| C(30)-C(25)-C(26)-C(27)  | 2.4(5)    |
| O(1)-C(25)-C(26)-C(27)   | -178.0(3) |
| C(25)-C(26)-C(27)-C(28)  | -1.1(6)   |
| C(26)-C(27)-C(28)-C(29)  | -0.2(7)   |
| C(27)-C(28)-C(29)-C(30)  | 0.3(7)    |
| O(1)-C(25)-C(30)-C(29)   | 178.2(3)  |
| C(26)-C(25)-C(30)-C(29)  | -2.2(5)   |
| C(28)-C(29)-C(30)-C(25)  | 0.9(6)    |
| C(25)-O(1)-B(1)-N(3)     | -165.0(3) |
| C(25)-O(1)-B(1)-N(5)     | -46.1(4)  |
| C(25)-O(1)-B(1)-N(1)     | 75.3(4)   |
| C(9)-N(3)-B(1)-O(1)      | -101.0(3) |
| C(16)-N(3)-B(1)-O(1)     | 94.8(4)   |
| C(9)-N(3)-B(1)-N(5)      | 133.4(3)  |
| C(16)-N(3)-B(1)-N(5)     | -30.9(4)  |
| C(9)-N(3)-B(1)-N(1)      | 26.1(4)   |
| C(16)-N(3)-B(1)-N(1)     | -138.1(3) |
| C(24)-N(5)-B(1)-O(1)     | 98.2(4)   |
| C(17)-N(5)-B(1)-O(1)     | -91.3(4)  |
| C(24)-N(5)-B(1)-N(3)     | -138.7(3) |
| C(17)-N(5)-B(1)-N(3)     | 31.8(4)   |
| C(24)-N(5)-B(1)-N(1)     | -30.5(4)  |
| C(17)-N(5)-B(1)-N(1)     | 140.0(3)  |
| C(8)-N(1)-B(1)-O(1)      | 96.2(4)   |
| C(1)-N(1)-B(1)-O(1)      | -97.8(4)  |
| C(8)-N(1)-B(1)-N(3)      | -27.7(4)  |
| C(1)-N(1)-B(1)-N(3)      | 138.4(3)  |
| C(8)-N(1)-B(1)-N(5)      | -135.8(3) |
| C(1)-N(1)-B(1)-N(5)      | 30.2(4)   |
| C(6S)-C(1S)-C(2S)-C(3S)  | 0.0       |
| Cl(1S)-C(1S)-C(2S)-C(3S) | -178.3(9) |



|                             |           |
|-----------------------------|-----------|
| C(1S)-C(2S)-C(3S)-C(4S)     | 0.0       |
| C(2S)-C(3S)-C(4S)-C(5S)     | 0.0       |
| C(3S)-C(4S)-C(5S)-C(6S)     | 0.0       |
| C(4S)-C(5S)-C(6S)-C(1S)     | 0.0       |
| C(2S)-C(1S)-C(6S)-C(5S)     | 0.0       |
| Cl(1S)-C(1S)-C(6S)-C(5S)    | 178.3(9)  |
| C(7S)-C(8S)-C(9S)-C(10S)    | -172.4(7) |
| C(8S)-C(9S)-C(10S)-C(11S)   | -178.4(7) |
| C(9S)-C(10S)-C(11S)-C(12S)  | 49.3(11)  |
| C(10S)-C(11S)-C(12S)-C(13S) | 175.0(9)  |

---

Symmetry transformations used to generate equivalent atoms:

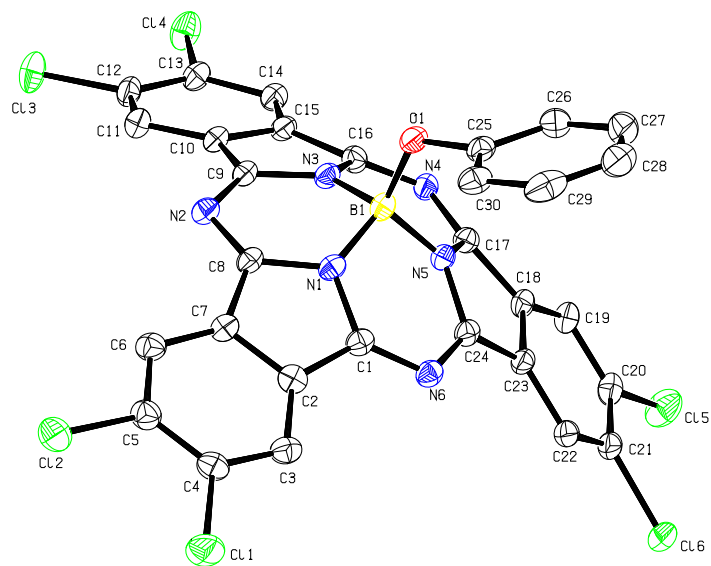

Figure S19: Anisotropic displacement ellipsoid plot of **PhO-Cl<sub>6</sub>BsubPc** (Dichlorobenzene: Pentane; CCDC deposit 2087095).

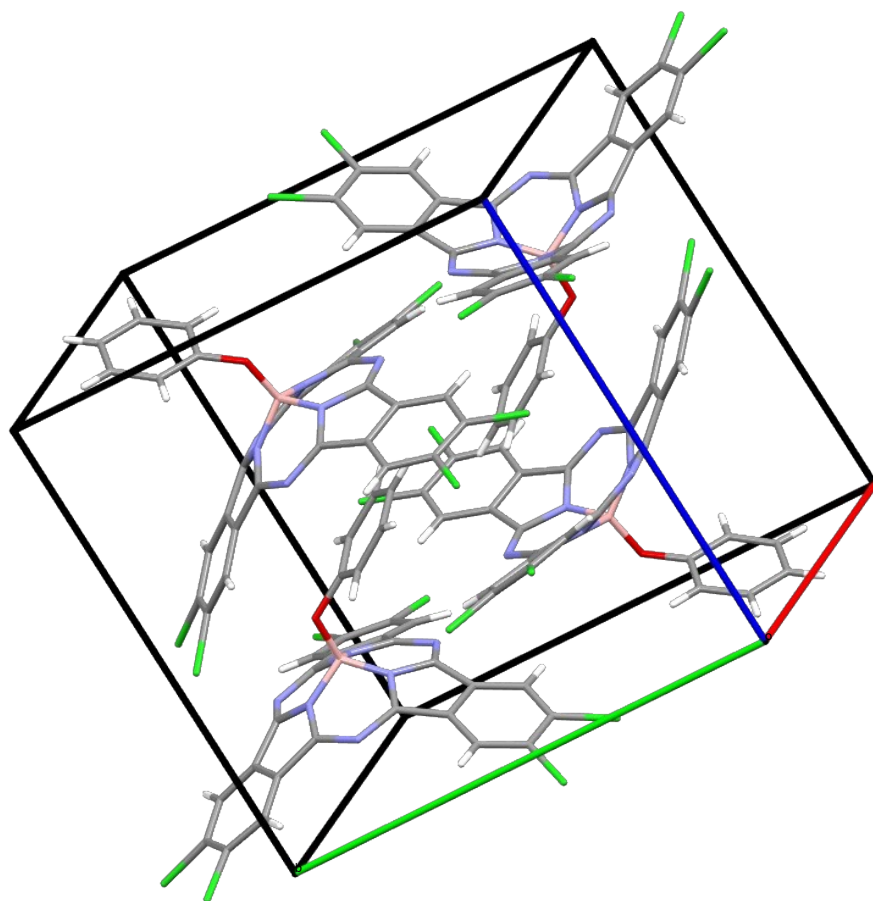

Figure S20: Populated unit cell of PhO-Cl<sub>6</sub>BsubPc (Dichlorobenzene:Pentane; CCDC deposit 2087095).

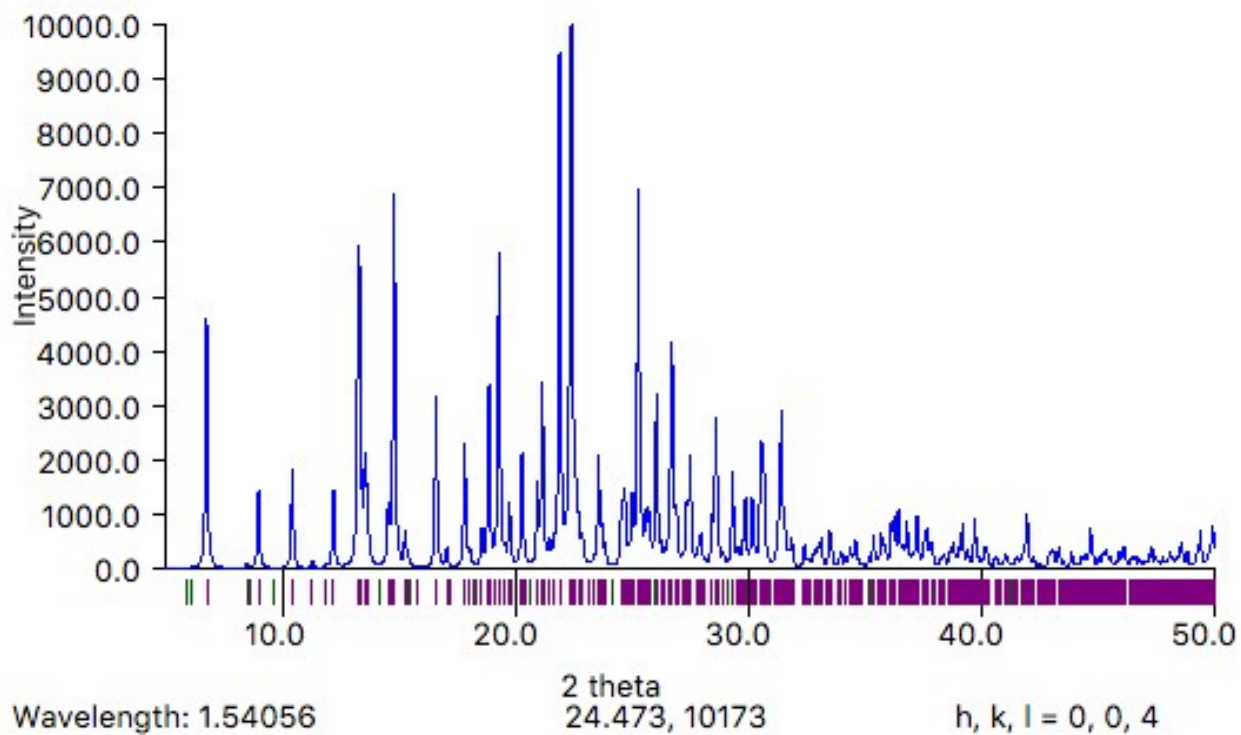

Figure S 21: Powder x-ray diffraction **PhO-Cl<sub>6</sub>BsubPc** (Dichlorobenzene:Pentane; CCDC deposit 2087095).

Table S 37. Crystal data and structure refinement for **PhO-Cl<sub>6</sub>BsubPc (Dichlorobenzene:Pentane; CCDC deposit 2087095)**.

|                                   |                                                                    |                 |
|-----------------------------------|--------------------------------------------------------------------|-----------------|
| Identification code               | d2026                                                              |                 |
| Empirical formula                 | C <sub>30</sub> H <sub>11</sub> B Cl <sub>6</sub> N <sub>6</sub> O |                 |
| Formula weight                    | 694.96                                                             |                 |
| Temperature                       | 150(2) K                                                           |                 |
| Wavelength                        | 1.54178 Å                                                          |                 |
| Crystal system                    | Monoclinic                                                         |                 |
| Space group                       | P2 <sub>1</sub> /c                                                 |                 |
| Unit cell dimensions              | a = 13.1340(6) Å                                                   | α = 90°.        |
|                                   | b = 14.9016(6) Å                                                   | β = 96.515(3)°. |
|                                   | c = 14.5799(7) Å                                                   | γ = 90°.        |
| Volume                            | 2835.1(2) Å <sup>3</sup>                                           |                 |
| Z                                 | 4                                                                  |                 |
| Density (calculated)              | 1.628 Mg/m <sup>3</sup>                                            |                 |
| Absorption coefficient            | 5.859 mm <sup>-1</sup>                                             |                 |
| F(000)                            | 1392                                                               |                 |
| Crystal size                      | 0.290 x 0.240 x 0.010 mm <sup>3</sup>                              |                 |
| Theta range for data collection   | 3.387 to 65.118°.                                                  |                 |
| Index ranges                      | -15 ≤ h ≤ 15, -17 ≤ k ≤ 17, -17 ≤ l ≤ 16                           |                 |
| Reflections collected             | 37982                                                              |                 |
| Independent reflections           | 4780 [R(int) = 0.1239]                                             |                 |
| Completeness to theta = 65.118°   | 98.7 %                                                             |                 |
| Absorption correction             | Semi-empirical from equivalents                                    |                 |
| Max. and min. transmission        | 0.7526 and 0.5026                                                  |                 |
| Refinement method                 | Full-matrix least-squares on F <sup>2</sup>                        |                 |
| Data / restraints / parameters    | 4780 / 0 / 398                                                     |                 |
| Goodness-of-fit on F <sup>2</sup> | 1.042                                                              |                 |
| Final R indices [I > 2σ(I)]       | R1 = 0.0550, wR2 = 0.1289                                          |                 |
| R indices (all data)              | R1 = 0.0806, wR2 = 0.1437                                          |                 |
| Extinction coefficient            | 0.0035(3)                                                          |                 |
| Largest diff. peak and hole       | 0.679 and -0.427 e.Å <sup>-3</sup>                                 |                 |

Table S 38. Atomic coordinates ( $\times 10^4$ ) and equivalent isotropic displacement parameters ( $\text{\AA}^2 \times 10^3$ ) for **PhO-Cl<sub>6</sub>BsubPc (Dichlorobenzene:Pentane; CCDC deposit 2087095)**. U(eq) is defined as one third of the trace of the orthogonalized  $U^{ij}$  tensor.

|       | x       | y        | z       | U(eq) |
|-------|---------|----------|---------|-------|
| Cl(1) | 9471(1) | 6746(1)  | 6932(1) | 65(1) |
| Cl(2) | 9088(1) | 4692(1)  | 7285(1) | 58(1) |
| Cl(3) | 1846(1) | 2143(1)  | 5613(1) | 54(1) |
| Cl(4) | -138(1) | 3344(1)  | 5319(1) | 52(1) |
| Cl(5) | 1102(1) | 9909(1)  | 4090(1) | 62(1) |
| Cl(6) | 3359(1) | 10668(1) | 4341(1) | 47(1) |
| O(1)  | 3590(2) | 6737(1)  | 8581(2) | 38(1) |
| N(1)  | 4865(2) | 6474(2)  | 7461(2) | 32(1) |
| N(2)  | 4650(2) | 4895(2)  | 7283(2) | 35(1) |
| N(3)  | 3213(2) | 5865(2)  | 7208(2) | 32(1) |
| N(4)  | 1874(2) | 6754(2)  | 6436(2) | 33(1) |
| N(5)  | 3469(2) | 7416(2)  | 7007(2) | 32(1) |
| N(6)  | 5167(2) | 7913(2)  | 6846(2) | 34(1) |
| C(1)  | 5510(3) | 7117(2)  | 7175(2) | 35(1) |
| C(2)  | 6494(3) | 6666(2)  | 7146(2) | 38(1) |
| C(3)  | 7455(3) | 6975(2)  | 6984(3) | 42(1) |
| C(4)  | 8258(3) | 6367(3)  | 7049(3) | 43(1) |
| C(5)  | 8090(3) | 5452(3)  | 7204(3) | 44(1) |
| C(6)  | 7124(3) | 5134(2)  | 7304(2) | 40(1) |
| C(7)  | 6326(3) | 5741(2)  | 7293(2) | 34(1) |
| C(8)  | 5250(3) | 5626(2)  | 7410(2) | 33(1) |
| C(9)  | 3640(3) | 5038(2)  | 7128(2) | 32(1) |
| C(10) | 2816(3) | 4487(2)  | 6679(2) | 33(1) |
| C(11) | 2792(3) | 3589(2)  | 6406(2) | 38(1) |
| C(12) | 1886(3) | 3251(2)  | 5969(2) | 38(1) |
| C(13) | 1015(3) | 3790(2)  | 5801(2) | 38(1) |
| C(14) | 1050(3) | 4699(2)  | 6014(2) | 36(1) |
| C(15) | 1952(3) | 5044(2)  | 6457(2) | 33(1) |
| C(16) | 2258(3) | 5956(2)  | 6734(2) | 34(1) |
| C(17) | 2517(3) | 7460(2)  | 6522(2) | 32(1) |

|       |         |         |          |       |
|-------|---------|---------|----------|-------|
| C(18) | 2510(3) | 8274(2) | 5976(2)  | 32(1) |
| C(19) | 1760(3) | 8677(2) | 5362(2)  | 38(1) |
| C(20) | 2026(3) | 9420(2) | 4871(2)  | 40(1) |
| C(21) | 3023(3) | 9755(2) | 4989(2)  | 37(1) |
| C(22) | 3787(3) | 9369(2) | 5588(2)  | 35(1) |
| C(23) | 3524(3) | 8623(2) | 6091(2)  | 32(1) |
| C(24) | 4142(3) | 8027(2) | 6712(2)  | 32(1) |
| C(25) | 3796(3) | 7524(2) | 9050(2)  | 38(1) |
| C(26) | 2989(3) | 8113(3) | 9132(3)  | 49(1) |
| C(27) | 3168(4) | 8886(3) | 9632(3)  | 64(1) |
| C(28) | 4125(5) | 9091(3) | 10035(3) | 71(2) |
| C(29) | 4936(4) | 8518(3) | 9961(3)  | 62(1) |
| C(30) | 4767(3) | 7712(3) | 9463(3)  | 46(1) |
| B(1)  | 3788(3) | 6653(2) | 7637(3)  | 34(1) |

---

Table S 39. Bond lengths [ $\text{\AA}$ ] and angles [ $^\circ$ ] for **PhO-Cl<sub>6</sub>BsubPc (Dichlorobenzene: Pentane; CCDC deposit 2087095)**.

---

|             |          |
|-------------|----------|
| Cl(1)-C(4)  | 1.716(4) |
| Cl(2)-C(5)  | 1.725(4) |
| Cl(3)-C(12) | 1.730(3) |
| Cl(4)-C(13) | 1.729(4) |
| Cl(5)-C(20) | 1.729(4) |
| Cl(6)-C(21) | 1.741(3) |
| O(1)-C(25)  | 1.369(4) |
| O(1)-B(1)   | 1.435(5) |
| N(1)-C(8)   | 1.366(4) |
| N(1)-C(1)   | 1.374(4) |
| N(1)-B(1)   | 1.490(5) |
| N(2)-C(9)   | 1.338(4) |
| N(2)-C(8)   | 1.345(4) |
| N(3)-C(9)   | 1.364(4) |
| N(3)-C(16)  | 1.368(4) |
| N(3)-B(1)   | 1.494(5) |
| N(4)-C(16)  | 1.344(4) |
| N(4)-C(17)  | 1.346(4) |
| N(5)-C(17)  | 1.367(4) |
| N(5)-C(24)  | 1.372(4) |
| N(5)-B(1)   | 1.491(5) |
| N(6)-C(1)   | 1.339(4) |
| N(6)-C(24)  | 1.348(4) |
| C(1)-C(2)   | 1.460(5) |
| C(2)-C(3)   | 1.389(5) |
| C(2)-C(7)   | 1.416(5) |
| C(3)-C(4)   | 1.385(5) |
| C(3)-H(3A)  | 0.9500   |
| C(4)-C(5)   | 1.404(5) |
| C(5)-C(6)   | 1.378(5) |
| C(6)-C(7)   | 1.384(5) |
| C(6)-H(6A)  | 0.9500   |



|                 |          |
|-----------------|----------|
| C(7)-C(8)       | 1.452(5) |
| C(9)-C(10)      | 1.454(5) |
| C(10)-C(11)     | 1.396(5) |
| C(10)-C(15)     | 1.414(5) |
| C(11)-C(12)     | 1.380(5) |
| C(11)-H(11A)    | 0.9500   |
| C(12)-C(13)     | 1.396(5) |
| C(13)-C(14)     | 1.388(5) |
| C(14)-C(15)     | 1.383(5) |
| C(14)-H(14A)    | 0.9500   |
| C(15)-C(16)     | 1.460(4) |
| C(17)-C(18)     | 1.451(5) |
| C(18)-C(19)     | 1.389(5) |
| C(18)-C(23)     | 1.422(5) |
| C(19)-C(20)     | 1.386(5) |
| C(19)-H(19A)    | 0.9500   |
| C(20)-C(21)     | 1.393(5) |
| C(21)-C(22)     | 1.379(5) |
| C(22)-C(23)     | 1.396(5) |
| C(22)-H(22A)    | 0.9500   |
| C(23)-C(24)     | 1.450(5) |
| C(25)-C(30)     | 1.377(5) |
| C(25)-C(26)     | 1.392(5) |
| C(26)-C(27)     | 1.368(6) |
| C(26)-H(26A)    | 0.9500   |
| C(27)-C(28)     | 1.360(7) |
| C(27)-H(27A)    | 0.9500   |
| C(28)-C(29)     | 1.379(7) |
| C(28)-H(28A)    | 0.9500   |
| C(29)-C(30)     | 1.408(6) |
| C(29)-H(29A)    | 0.9500   |
| C(30)-H(30A)    | 0.9500   |
| C(25)-O(1)-B(1) | 120.4(3) |
| C(8)-N(1)-C(1)  | 112.5(3) |
| C(8)-N(1)-B(1)  | 122.6(3) |

|                  |          |
|------------------|----------|
| C(1)-N(1)-B(1)   | 123.9(3) |
| C(9)-N(2)-C(8)   | 116.6(3) |
| C(9)-N(3)-C(16)  | 114.1(3) |
| C(9)-N(3)-B(1)   | 123.5(3) |
| C(16)-N(3)-B(1)  | 121.7(3) |
| C(16)-N(4)-C(17) | 116.9(3) |
| C(17)-N(5)-C(24) | 113.0(3) |
| C(17)-N(5)-B(1)  | 122.2(3) |
| C(24)-N(5)-B(1)  | 123.6(3) |
| C(1)-N(6)-C(24)  | 117.0(3) |
| N(6)-C(1)-N(1)   | 122.1(3) |
| N(6)-C(1)-C(2)   | 131.3(3) |
| N(1)-C(1)-C(2)   | 105.4(3) |
| C(3)-C(2)-C(7)   | 120.5(3) |
| C(3)-C(2)-C(1)   | 132.6(3) |
| C(7)-C(2)-C(1)   | 106.9(3) |
| C(4)-C(3)-C(2)   | 118.2(3) |
| C(4)-C(3)-H(3A)  | 120.9    |
| C(2)-C(3)-H(3A)  | 120.9    |
| C(3)-C(4)-C(5)   | 120.9(3) |
| C(3)-C(4)-Cl(1)  | 119.1(3) |
| C(5)-C(4)-Cl(1)  | 120.0(3) |
| C(6)-C(5)-C(4)   | 121.0(3) |
| C(6)-C(5)-Cl(2)  | 117.9(3) |
| C(4)-C(5)-Cl(2)  | 121.1(3) |
| C(5)-C(6)-C(7)   | 118.6(3) |
| C(5)-C(6)-H(6A)  | 120.7    |
| C(7)-C(6)-H(6A)  | 120.7    |
| C(6)-C(7)-C(2)   | 120.5(3) |
| C(6)-C(7)-C(8)   | 131.8(3) |
| C(2)-C(7)-C(8)   | 107.6(3) |
| N(2)-C(8)-N(1)   | 122.8(3) |
| N(2)-C(8)-C(7)   | 129.9(3) |
| N(1)-C(8)-C(7)   | 105.6(3) |
| N(2)-C(9)-N(3)   | 122.7(3) |
| N(2)-C(9)-C(10)  | 131.3(3) |

|                    |          |
|--------------------|----------|
| N(3)-C(9)-C(10)    | 104.8(3) |
| C(11)-C(10)-C(15)  | 120.4(3) |
| C(11)-C(10)-C(9)   | 131.4(3) |
| C(15)-C(10)-C(9)   | 108.0(3) |
| C(12)-C(11)-C(10)  | 118.2(3) |
| C(12)-C(11)-H(11A) | 120.9    |
| C(10)-C(11)-H(11A) | 120.9    |
| C(11)-C(12)-C(13)  | 121.1(3) |
| C(11)-C(12)-Cl(3)  | 118.8(3) |
| C(13)-C(12)-Cl(3)  | 120.0(3) |
| C(14)-C(13)-C(12)  | 121.1(3) |
| C(14)-C(13)-Cl(4)  | 118.1(3) |
| C(12)-C(13)-Cl(4)  | 120.8(3) |
| C(15)-C(14)-C(13)  | 118.2(3) |
| C(15)-C(14)-H(14A) | 120.9    |
| C(13)-C(14)-H(14A) | 120.9    |
| C(14)-C(15)-C(10)  | 120.7(3) |
| C(14)-C(15)-C(16)  | 132.1(3) |
| C(10)-C(15)-C(16)  | 107.1(3) |
| N(4)-C(16)-N(3)    | 122.6(3) |
| N(4)-C(16)-C(15)   | 130.7(3) |
| N(3)-C(16)-C(15)   | 104.8(3) |
| N(4)-C(17)-N(5)    | 122.5(3) |
| N(4)-C(17)-C(18)   | 129.6(3) |
| N(5)-C(17)-C(18)   | 105.8(3) |
| C(19)-C(18)-C(23)  | 120.3(3) |
| C(19)-C(18)-C(17)  | 132.4(3) |
| C(23)-C(18)-C(17)  | 107.0(3) |
| C(20)-C(19)-C(18)  | 118.4(3) |
| C(20)-C(19)-H(19A) | 120.8    |
| C(18)-C(19)-H(19A) | 120.8    |
| C(19)-C(20)-C(21)  | 120.8(3) |
| C(19)-C(20)-Cl(5)  | 118.5(3) |
| C(21)-C(20)-Cl(5)  | 120.7(3) |
| C(22)-C(21)-C(20)  | 122.3(3) |
| C(22)-C(21)-Cl(6)  | 117.3(3) |

|                    |          |
|--------------------|----------|
| C(20)-C(21)-Cl(6)  | 120.3(3) |
| C(21)-C(22)-C(23)  | 117.4(3) |
| C(21)-C(22)-H(22A) | 121.3    |
| C(23)-C(22)-H(22A) | 121.3    |
| C(22)-C(23)-C(18)  | 120.8(3) |
| C(22)-C(23)-C(24)  | 131.4(3) |
| C(18)-C(23)-C(24)  | 107.5(3) |
| N(6)-C(24)-N(5)    | 122.7(3) |
| N(6)-C(24)-C(23)   | 130.2(3) |
| N(5)-C(24)-C(23)   | 105.5(3) |
| O(1)-C(25)-C(30)   | 121.0(3) |
| O(1)-C(25)-C(26)   | 118.3(3) |
| C(30)-C(25)-C(26)  | 120.7(4) |
| C(27)-C(26)-C(25)  | 119.4(4) |
| C(27)-C(26)-H(26A) | 120.3    |
| C(25)-C(26)-H(26A) | 120.3    |
| C(28)-C(27)-C(26)  | 120.9(5) |
| C(28)-C(27)-H(27A) | 119.5    |
| C(26)-C(27)-H(27A) | 119.5    |
| C(27)-C(28)-C(29)  | 120.7(4) |
| C(27)-C(28)-H(28A) | 119.6    |
| C(29)-C(28)-H(28A) | 119.6    |
| C(28)-C(29)-C(30)  | 119.4(4) |
| C(28)-C(29)-H(29A) | 120.3    |
| C(30)-C(29)-H(29A) | 120.3    |
| C(25)-C(30)-C(29)  | 118.9(4) |
| C(25)-C(30)-H(30A) | 120.5    |
| C(29)-C(30)-H(30A) | 120.5    |
| O(1)-B(1)-N(1)     | 117.4(3) |
| O(1)-B(1)-N(5)     | 117.1(3) |
| N(1)-B(1)-N(5)     | 103.7(3) |
| O(1)-B(1)-N(3)     | 109.3(3) |
| N(1)-B(1)-N(3)     | 103.5(3) |
| N(5)-B(1)-N(3)     | 104.3(3) |

---

Symmetry transformations used to generate equivalent atoms:

Table S 40. Anisotropic displacement parameters ( $\text{\AA}^2 \times 10^3$ ) for **PhO-Cl<sub>6</sub>BsubPc (Dichlorobenzene:Pentane; CCDC deposit 2087095)**. The anisotropic displacement factor exponent takes the form:  $-2p^2 [ h^2 a^* U^{11} + \dots + 2 h k a^* b^* U^{12} ]$ .

|       | U <sup>11</sup> | U <sup>22</sup> | U <sup>33</sup> | U <sup>23</sup> | U <sup>13</sup> | U <sup>12</sup> |
|-------|-----------------|-----------------|-----------------|-----------------|-----------------|-----------------|
| Cl(1) | 37(1)           | 69(1)           | 90(1)           | 11(1)           | 16(1)           | -6(1)           |
| Cl(2) | 42(1)           | 61(1)           | 72(1)           | 5(1)            | 12(1)           | 9(1)            |
| Cl(3) | 68(1)           | 30(1)           | 61(1)           | -11(1)          | -8(1)           | 2(1)            |
| Cl(4) | 50(1)           | 36(1)           | 66(1)           | -7(1)           | -10(1)          | -8(1)           |
| Cl(5) | 58(1)           | 55(1)           | 70(1)           | 22(1)           | -9(1)           | 4(1)            |
| Cl(6) | 61(1)           | 34(1)           | 49(1)           | 10(1)           | 13(1)           | 2(1)            |
| O(1)  | 50(2)           | 31(1)           | 33(1)           | 0(1)            | 8(1)            | -6(1)           |
| N(1)  | 34(2)           | 30(1)           | 33(2)           | 2(1)            | 1(1)            | -6(1)           |
| N(2)  | 36(2)           | 32(2)           | 36(2)           | 6(1)            | 2(1)            | -1(1)           |
| N(3)  | 31(2)           | 27(1)           | 37(2)           | 1(1)            | 4(1)            | -4(1)           |
| N(4)  | 32(2)           | 27(2)           | 40(2)           | 0(1)            | 6(1)            | 0(1)            |
| N(5)  | 35(2)           | 25(1)           | 35(2)           | -3(1)           | 6(1)            | -4(1)           |
| N(6)  | 39(2)           | 30(2)           | 33(2)           | -2(1)           | 2(1)            | -6(1)           |
| C(1)  | 37(2)           | 34(2)           | 33(2)           | -2(2)           | 1(2)            | -7(2)           |
| C(2)  | 36(2)           | 42(2)           | 35(2)           | -2(2)           | 1(2)            | -1(2)           |
| C(3)  | 42(2)           | 43(2)           | 41(2)           | 1(2)            | 7(2)            | -8(2)           |
| C(4)  | 32(2)           | 52(2)           | 47(2)           | -1(2)           | 7(2)            | -3(2)           |
| C(5)  | 38(2)           | 48(2)           | 45(2)           | 3(2)            | 6(2)            | 4(2)            |
| C(6)  | 42(2)           | 44(2)           | 35(2)           | 5(2)            | 4(2)            | 1(2)            |
| C(7)  | 34(2)           | 34(2)           | 34(2)           | 3(1)            | -2(2)           | -3(2)           |
| C(8)  | 39(2)           | 28(2)           | 30(2)           | 4(1)            | 1(2)            | -2(2)           |
| C(9)  | 36(2)           | 26(2)           | 33(2)           | 4(1)            | 4(2)            | -1(1)           |
| C(10) | 38(2)           | 26(2)           | 36(2)           | 5(1)            | 5(2)            | -2(2)           |
| C(11) | 40(2)           | 30(2)           | 42(2)           | 1(2)            | 2(2)            | 1(2)            |
| C(12) | 50(2)           | 25(2)           | 39(2)           | -2(1)           | 5(2)            | 1(2)            |
| C(13) | 42(2)           | 31(2)           | 39(2)           | 0(2)            | 0(2)            | -6(2)           |
| C(14) | 38(2)           | 32(2)           | 39(2)           | 1(2)            | 5(2)            | -2(2)           |
| C(15) | 38(2)           | 28(2)           | 34(2)           | 2(1)            | 6(2)            | -4(2)           |

|       |        |       |       |        |       |        |
|-------|--------|-------|-------|--------|-------|--------|
| C(16) | 32(2)  | 32(2) | 39(2) | -4(2)  | 6(2)  | -1(2)  |
| C(17) | 33(2)  | 30(2) | 33(2) | -3(1)  | 5(2)  | -4(2)  |
| C(18) | 38(2)  | 24(2) | 34(2) | -4(1)  | 2(2)  | -2(1)  |
| C(19) | 43(2)  | 28(2) | 43(2) | -3(2)  | 2(2)  | 1(2)   |
| C(20) | 48(2)  | 31(2) | 40(2) | -1(2)  | 0(2)  | 7(2)   |
| C(21) | 52(2)  | 27(2) | 35(2) | -2(2)  | 11(2) | 2(2)   |
| C(22) | 43(2)  | 29(2) | 34(2) | -3(1)  | 9(2)  | -2(2)  |
| C(23) | 43(2)  | 24(2) | 29(2) | -1(1)  | 6(2)  | -2(2)  |
| C(24) | 39(2)  | 27(2) | 31(2) | -5(1)  | 3(2)  | -6(2)  |
| C(25) | 51(2)  | 33(2) | 29(2) | 2(2)   | 8(2)  | -5(2)  |
| C(26) | 59(3)  | 46(2) | 42(2) | 5(2)   | 14(2) | 4(2)   |
| C(27) | 100(4) | 45(2) | 53(3) | -2(2)  | 32(3) | 6(3)   |
| C(28) | 128(5) | 46(3) | 42(3) | -10(2) | 30(3) | -13(3) |
| C(29) | 85(4)  | 62(3) | 35(2) | 2(2)   | -2(2) | -32(3) |
| C(30) | 53(3)  | 48(2) | 36(2) | 7(2)   | 4(2)  | -6(2)  |
| B(1)  | 38(2)  | 27(2) | 35(2) | 0(2)   | -1(2) | -2(2)  |

---

Table S 41. Hydrogen coordinates ( $\times 10^4$ ) and isotropic displacement parameters ( $\text{\AA}^2 \times 10^3$ ) for **PhO-Cl<sub>6</sub>BsubPc (Dichlorobenzene:Pentane; CCDC deposit 2087095)**.

|        | x    | y    | z     | U(eq) |
|--------|------|------|-------|-------|
| H(3A)  | 7559 | 7586 | 6834  | 50    |
| H(6A)  | 7009 | 4510 | 7378  | 49    |
| H(11A) | 3383 | 3221 | 6519  | 45    |
| H(14A) | 470  | 5072 | 5859  | 43    |
| H(19A) | 1080 | 8448 | 5282  | 46    |
| H(22A) | 4465 | 9601 | 5655  | 42    |
| H(26A) | 2320 | 7980 | 8845  | 58    |
| H(27A) | 2617 | 9285 | 9697  | 77    |
| H(28A) | 4235 | 9635 | 10372 | 85    |
| H(29A) | 5603 | 8667 | 10243 | 74    |
| H(30A) | 5315 | 7305 | 9413  | 55    |

Table S 42. Torsion angles [°] for **PhO-Cl<sub>6</sub>BsubPc (Dichlorobenzene:Pentane; CCDC deposit 2087095)**.

---

|                       |           |
|-----------------------|-----------|
| C(24)-N(6)-C(1)-N(1)  | -6.9(5)   |
| C(24)-N(6)-C(1)-C(2)  | 159.1(3)  |
| C(8)-N(1)-C(1)-N(6)   | 154.9(3)  |
| B(1)-N(1)-C(1)-N(6)   | -14.3(5)  |
| C(8)-N(1)-C(1)-C(2)   | -14.3(4)  |
| B(1)-N(1)-C(1)-C(2)   | 176.6(3)  |
| N(6)-C(1)-C(2)-C(3)   | 18.4(6)   |
| N(1)-C(1)-C(2)-C(3)   | -173.9(4) |
| N(6)-C(1)-C(2)-C(7)   | -159.6(3) |
| N(1)-C(1)-C(2)-C(7)   | 8.2(4)    |
| C(7)-C(2)-C(3)-C(4)   | -5.3(5)   |
| C(1)-C(2)-C(3)-C(4)   | 177.0(4)  |
| C(2)-C(3)-C(4)-C(5)   | 4.7(6)    |
| C(2)-C(3)-C(4)-Cl(1)  | -175.5(3) |
| C(3)-C(4)-C(5)-C(6)   | -0.5(6)   |
| Cl(1)-C(4)-C(5)-C(6)  | 179.7(3)  |
| C(3)-C(4)-C(5)-Cl(2)  | -180.0(3) |
| Cl(1)-C(4)-C(5)-Cl(2) | 0.2(5)    |
| C(4)-C(5)-C(6)-C(7)   | -3.1(5)   |
| Cl(2)-C(5)-C(6)-C(7)  | 176.4(3)  |
| C(5)-C(6)-C(7)-C(2)   | 2.4(5)    |
| C(5)-C(6)-C(7)-C(8)   | -177.6(4) |
| C(3)-C(2)-C(7)-C(6)   | 1.8(5)    |
| C(1)-C(2)-C(7)-C(6)   | -180.0(3) |
| C(3)-C(2)-C(7)-C(8)   | -178.1(3) |
| C(1)-C(2)-C(7)-C(8)   | 0.1(4)    |
| C(9)-N(2)-C(8)-N(1)   | 5.6(5)    |
| C(9)-N(2)-C(8)-C(7)   | -157.5(3) |
| C(1)-N(1)-C(8)-N(2)   | -152.2(3) |
| B(1)-N(1)-C(8)-N(2)   | 17.0(5)   |
| C(1)-N(1)-C(8)-C(7)   | 14.3(4)   |
| B(1)-N(1)-C(8)-C(7)   | -176.4(3) |
| C(6)-C(7)-C(8)-N(2)   | -23.0(6)  |



|                         |           |
|-------------------------|-----------|
| C(2)-C(7)-C(8)-N(2)     | 156.9(3)  |
| C(6)-C(7)-C(8)-N(1)     | 171.7(4)  |
| C(2)-C(7)-C(8)-N(1)     | -8.4(4)   |
| C(8)-N(2)-C(9)-N(3)     | -8.2(5)   |
| C(8)-N(2)-C(9)-C(10)    | 157.0(3)  |
| C(16)-N(3)-C(9)-N(2)    | 158.6(3)  |
| B(1)-N(3)-C(9)-N(2)     | -11.6(5)  |
| C(16)-N(3)-C(9)-C(10)   | -10.0(4)  |
| B(1)-N(3)-C(9)-C(10)    | 179.9(3)  |
| N(2)-C(9)-C(10)-C(11)   | 12.0(6)   |
| N(3)-C(9)-C(10)-C(11)   | 179.1(4)  |
| N(2)-C(9)-C(10)-C(15)   | -163.0(3) |
| N(3)-C(9)-C(10)-C(15)   | 4.1(4)    |
| C(15)-C(10)-C(11)-C(12) | -4.0(5)   |
| C(9)-C(10)-C(11)-C(12)  | -178.5(3) |
| C(10)-C(11)-C(12)-C(13) | 0.1(5)    |
| C(10)-C(11)-C(12)-Cl(3) | 179.2(3)  |
| C(11)-C(12)-C(13)-C(14) | 4.3(6)    |
| Cl(3)-C(12)-C(13)-C(14) | -174.9(3) |
| C(11)-C(12)-C(13)-Cl(4) | -175.9(3) |
| Cl(3)-C(12)-C(13)-Cl(4) | 5.0(4)    |
| C(12)-C(13)-C(14)-C(15) | -4.5(5)   |
| Cl(4)-C(13)-C(14)-C(15) | 175.7(3)  |
| C(13)-C(14)-C(15)-C(10) | 0.5(5)    |
| C(13)-C(14)-C(15)-C(16) | 176.6(4)  |
| C(11)-C(10)-C(15)-C(14) | 3.8(5)    |
| C(9)-C(10)-C(15)-C(14)  | 179.5(3)  |
| C(11)-C(10)-C(15)-C(16) | -173.2(3) |
| C(9)-C(10)-C(15)-C(16)  | 2.5(4)    |
| C(17)-N(4)-C(16)-N(3)   | 8.0(5)    |
| C(17)-N(4)-C(16)-C(15)  | -154.0(3) |
| C(9)-N(3)-C(16)-N(4)    | -154.5(3) |
| B(1)-N(3)-C(16)-N(4)    | 15.8(5)   |
| C(9)-N(3)-C(16)-C(15)   | 11.5(4)   |
| B(1)-N(3)-C(16)-C(15)   | -178.2(3) |
| C(14)-C(15)-C(16)-N(4)  | -20.2(6)  |

|                         |           |
|-------------------------|-----------|
| C(10)-C(15)-C(16)-N(4)  | 156.3(3)  |
| C(14)-C(15)-C(16)-N(3)  | 175.4(3)  |
| C(10)-C(15)-C(16)-N(3)  | -8.1(4)   |
| C(16)-N(4)-C(17)-N(5)   | -9.5(5)   |
| C(16)-N(4)-C(17)-C(18)  | 152.1(3)  |
| C(24)-N(5)-C(17)-N(4)   | 154.4(3)  |
| B(1)-N(5)-C(17)-N(4)    | -12.9(5)  |
| C(24)-N(5)-C(17)-C(18)  | -11.0(4)  |
| B(1)-N(5)-C(17)-C(18)   | -178.3(3) |
| N(4)-C(17)-C(18)-C(19)  | 16.9(6)   |
| N(5)-C(17)-C(18)-C(19)  | -179.1(4) |
| N(4)-C(17)-C(18)-C(23)  | -157.3(3) |
| N(5)-C(17)-C(18)-C(23)  | 6.7(3)    |
| C(23)-C(18)-C(19)-C(20) | 0.0(5)    |
| C(17)-C(18)-C(19)-C(20) | -173.5(3) |
| C(18)-C(19)-C(20)-C(21) | 0.1(5)    |
| C(18)-C(19)-C(20)-Cl(5) | 178.7(3)  |
| C(19)-C(20)-C(21)-C(22) | 0.3(5)    |
| Cl(5)-C(20)-C(21)-C(22) | -178.3(3) |
| C(19)-C(20)-C(21)-Cl(6) | 178.0(3)  |
| Cl(5)-C(20)-C(21)-Cl(6) | -0.6(4)   |
| C(20)-C(21)-C(22)-C(23) | -0.7(5)   |
| Cl(6)-C(21)-C(22)-C(23) | -178.5(2) |
| C(21)-C(22)-C(23)-C(18) | 0.8(5)    |
| C(21)-C(22)-C(23)-C(24) | 174.6(3)  |
| C(19)-C(18)-C(23)-C(22) | -0.5(5)   |
| C(17)-C(18)-C(23)-C(22) | 174.5(3)  |
| C(19)-C(18)-C(23)-C(24) | -175.6(3) |
| C(17)-C(18)-C(23)-C(24) | -0.5(4)   |
| C(1)-N(6)-C(24)-N(5)    | 8.5(5)    |
| C(1)-N(6)-C(24)-C(23)   | -154.9(3) |
| C(17)-N(5)-C(24)-N(6)   | -156.3(3) |
| B(1)-N(5)-C(24)-N(6)    | 10.8(5)   |
| C(17)-N(5)-C(24)-C(23)  | 10.7(4)   |
| B(1)-N(5)-C(24)-C(23)   | 177.8(3)  |
| C(22)-C(23)-C(24)-N(6)  | -14.6(6)  |

|                         |           |
|-------------------------|-----------|
| C(18)-C(23)-C(24)-N(6)  | 159.8(3)  |
| C(22)-C(23)-C(24)-N(5)  | 179.9(3)  |
| C(18)-C(23)-C(24)-N(5)  | -5.8(3)   |
| B(1)-O(1)-C(25)-C(30)   | -83.6(4)  |
| B(1)-O(1)-C(25)-C(26)   | 99.1(4)   |
| O(1)-C(25)-C(26)-C(27)  | 177.2(3)  |
| C(30)-C(25)-C(26)-C(27) | -0.1(5)   |
| C(25)-C(26)-C(27)-C(28) | 1.0(6)    |
| C(26)-C(27)-C(28)-C(29) | -0.8(7)   |
| C(27)-C(28)-C(29)-C(30) | -0.2(6)   |
| O(1)-C(25)-C(30)-C(29)  | -178.1(3) |
| C(26)-C(25)-C(30)-C(29) | -0.9(5)   |
| C(28)-C(29)-C(30)-C(25) | 1.0(6)    |
| C(25)-O(1)-B(1)-N(1)    | 80.1(4)   |
| C(25)-O(1)-B(1)-N(5)    | -44.2(5)  |
| C(25)-O(1)-B(1)-N(3)    | -162.5(3) |
| C(8)-N(1)-B(1)-O(1)     | 89.5(4)   |
| C(1)-N(1)-B(1)-O(1)     | -102.4(4) |
| C(8)-N(1)-B(1)-N(5)     | -139.7(3) |
| C(1)-N(1)-B(1)-N(5)     | 28.4(4)   |
| C(8)-N(1)-B(1)-N(3)     | -31.0(4)  |
| C(1)-N(1)-B(1)-N(3)     | 137.1(3)  |
| C(17)-N(5)-B(1)-O(1)    | -89.6(4)  |
| C(24)-N(5)-B(1)-O(1)    | 104.4(4)  |
| C(17)-N(5)-B(1)-N(1)    | 139.4(3)  |
| C(24)-N(5)-B(1)-N(1)    | -26.6(4)  |
| C(17)-N(5)-B(1)-N(3)    | 31.3(4)   |
| C(24)-N(5)-B(1)-N(3)    | -134.6(3) |
| C(9)-N(3)-B(1)-O(1)     | -97.3(4)  |
| C(16)-N(3)-B(1)-O(1)    | 93.3(4)   |
| C(9)-N(3)-B(1)-N(1)     | 28.6(4)   |
| C(16)-N(3)-B(1)-N(1)    | -140.9(3) |
| C(9)-N(3)-B(1)-N(5)     | 136.8(3)  |
| C(16)-N(3)-B(1)-N(5)    | -32.7(4)  |

---

Symmetry transformations used to generate equivalent atoms:

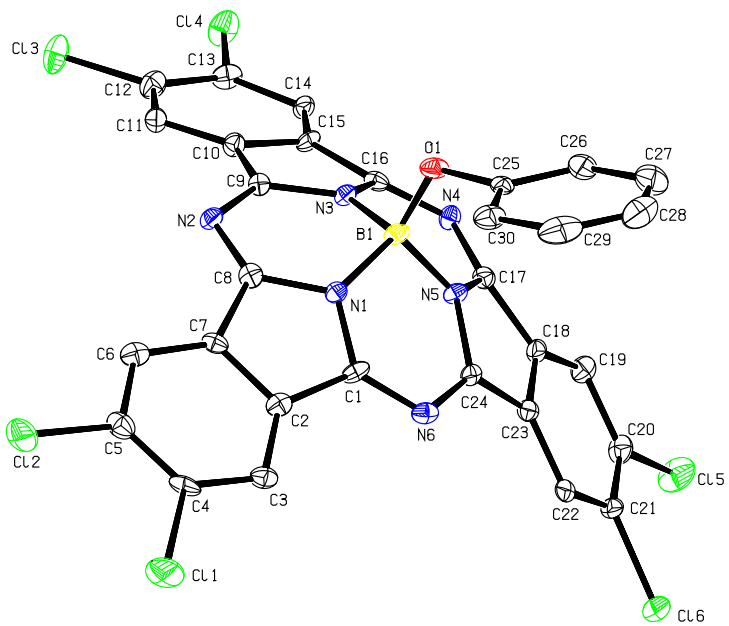

Figure S22: Anisotropic displacement ellipsoid plot of PhO-Cl<sub>6</sub>BsubPc (Dichlorobenzene:Dimethoxybenzene: Pentane; CCDC deposit 2087098).

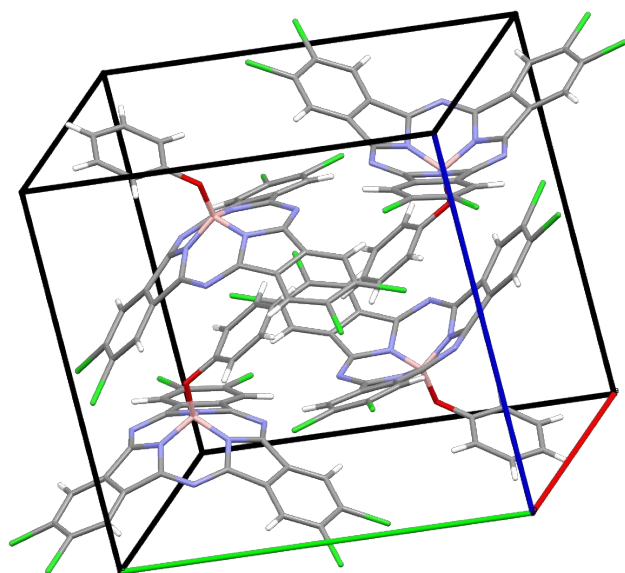

Figure S23: Populated unit cell of **PhO-Cl<sub>6</sub>BsubPc** (Dichlorobenzene:Dimethoxybenzene: Pentane; CCDC deposit 2087098).

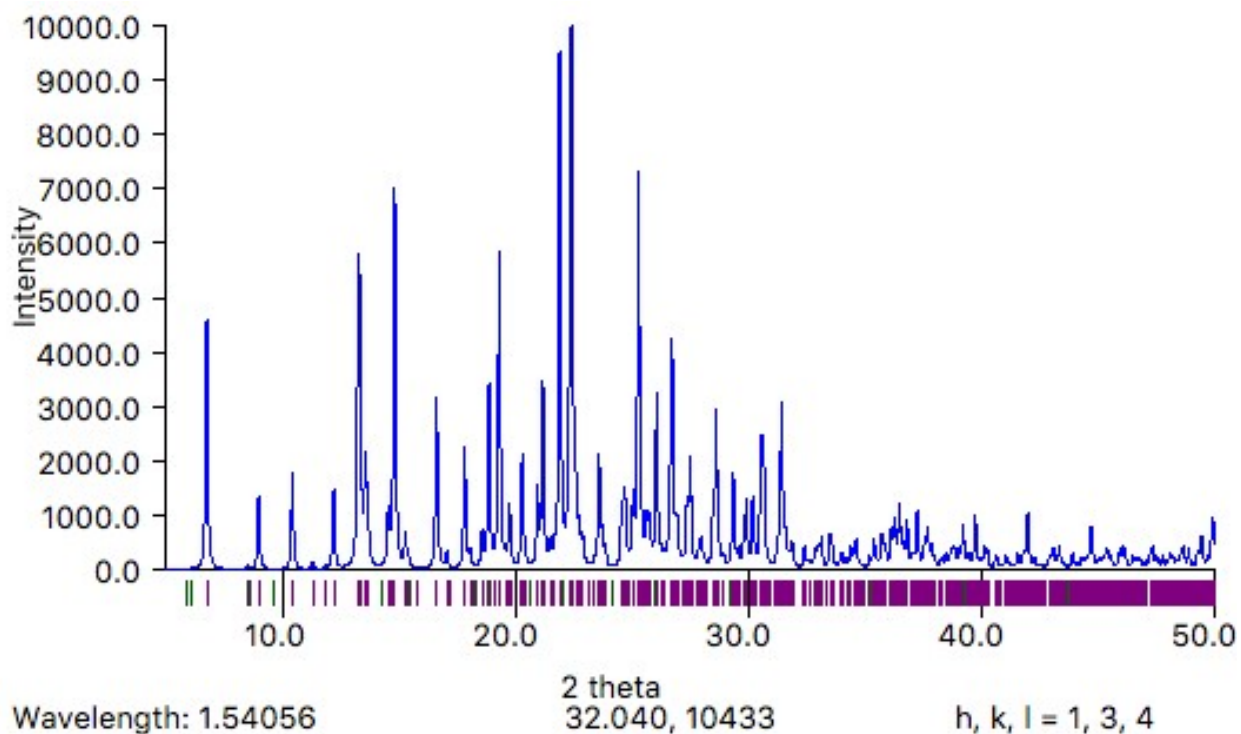

Figure S24: Powder x-ray diffraction **PhO-Cl<sub>6</sub>BsubPc** (Dichlorobenzene:Dimethoxybenzene: Pentane; CCDC deposit 2087098).

Table S 43. Crystal data and structure refinement for **PhO-Cl<sub>6</sub>BsubPc**  
(**Dichlorobenzene:Dimethoxybenzene: Pentane; CCDC deposit 2087098**).

|                                   |                                                                    |                 |
|-----------------------------------|--------------------------------------------------------------------|-----------------|
| Identification code               | d19194_a                                                           |                 |
| Empirical formula                 | C <sub>30</sub> H <sub>11</sub> B Cl <sub>6</sub> N <sub>6</sub> O |                 |
| Formula weight                    | 694.96                                                             |                 |
| Temperature                       | 150(2) K                                                           |                 |
| Wavelength                        | 0.71073 Å                                                          |                 |
| Crystal system                    | Monoclinic                                                         |                 |
| Space group                       | P2 <sub>1</sub> /c                                                 |                 |
| Unit cell dimensions              | a = 13.118(3) Å                                                    | α = 90°.        |
|                                   | b = 14.899(2) Å                                                    | β = 96.581(9)°. |
|                                   | c = 14.576(3) Å                                                    | γ = 90°.        |
| Volume                            | 2830.1(9) Å <sup>3</sup>                                           |                 |
| Z                                 | 4                                                                  |                 |
| Density (calculated)              | 1.631 Mg/m <sup>3</sup>                                            |                 |
| Absorption coefficient            | 0.647 mm <sup>-1</sup>                                             |                 |
| F(000)                            | 1392                                                               |                 |
| Crystal size                      | 0.160 x 0.130 x 0.030 mm <sup>3</sup>                              |                 |
| Theta range for data collection   | 1.563 to 24.998°.                                                  |                 |
| Index ranges                      | -14 ≤ h ≤ 15, -17 ≤ k ≤ 17, -17 ≤ l ≤ 15                           |                 |
| Reflections collected             | 25715                                                              |                 |
| Independent reflections           | 4992 [R(int) = 0.2229]                                             |                 |
| Completeness to theta = 24.998°   | 100.0 %                                                            |                 |
| Absorption correction             | Semi-empirical from equivalents                                    |                 |
| Max. and min. transmission        | 0.7456 and 0.6619                                                  |                 |
| Refinement method                 | Full-matrix least-squares on F <sup>2</sup>                        |                 |
| Data / restraints / parameters    | 4992 / 0 / 397                                                     |                 |
| Goodness-of-fit on F <sup>2</sup> | 0.992                                                              |                 |
| Final R indices [I > 2σ(I)]       | R1 = 0.0635, wR2 = 0.0834                                          |                 |
| R indices (all data)              | R1 = 0.1968, wR2 = 0.1200                                          |                 |
| Extinction coefficient            | n/a                                                                |                 |
| Largest diff. peak and hole       | 0.442 and -0.453 e.Å <sup>-3</sup>                                 |                 |

Table S 44. Atomic coordinates ( $\times 10^4$ ) and equivalent isotropic displacement parameters ( $\text{\AA}^2 \times 10^3$ ) for **PhO-Cl<sub>6</sub>BsubPc (Dichlorobenzene:Dimethoxybenzene: Pentane; CCDC deposit 2087098)**.  $U(\text{eq})$  is defined as one third of the trace of the orthogonalized  $U^{ij}$  tensor.

|       | x       | y        | z       | U(eq) |
|-------|---------|----------|---------|-------|
| Cl(1) | 9472(1) | 6749(1)  | 6934(1) | 54(1) |
| Cl(2) | 9088(1) | 4694(1)  | 7285(1) | 48(1) |
| Cl(3) | 1846(1) | 2143(1)  | 5613(1) | 43(1) |
| Cl(4) | -135(1) | 3345(1)  | 5318(1) | 41(1) |
| Cl(5) | 1101(2) | 9908(1)  | 4090(1) | 50(1) |
| Cl(6) | 3357(1) | 10668(1) | 4340(1) | 36(1) |
| O(1)  | 3587(3) | 6734(2)  | 8575(2) | 27(1) |
| N(1)  | 4867(4) | 6482(3)  | 7460(3) | 19(1) |
| N(2)  | 4650(4) | 4894(3)  | 7287(3) | 22(1) |
| N(3)  | 3201(4) | 5871(3)  | 7211(3) | 19(1) |
| N(4)  | 1868(4) | 6756(3)  | 6439(3) | 21(1) |
| N(5)  | 3471(4) | 7420(3)  | 7013(3) | 19(1) |
| N(6)  | 5168(4) | 7912(3)  | 6849(3) | 23(1) |
| C(1)  | 5510(5) | 7115(4)  | 7185(4) | 23(2) |
| C(2)  | 6505(5) | 6667(4)  | 7138(4) | 24(2) |
| C(3)  | 7455(5) | 6982(4)  | 6985(4) | 26(2) |
| C(4)  | 8246(5) | 6372(4)  | 7046(4) | 29(2) |
| C(5)  | 8091(5) | 5460(4)  | 7199(4) | 32(2) |
| C(6)  | 7117(5) | 5134(4)  | 7297(3) | 27(2) |
| C(7)  | 6331(5) | 5745(4)  | 7294(4) | 21(2) |
| C(8)  | 5253(5) | 5631(4)  | 7409(4) | 23(2) |
| C(9)  | 3639(5) | 5046(4)  | 7126(4) | 20(2) |
| C(10) | 2819(5) | 4478(4)  | 6678(4) | 23(2) |
| C(11) | 2794(5) | 3589(4)  | 6398(4) | 25(2) |
| C(12) | 1880(5) | 3245(4)  | 5967(4) | 31(2) |
| C(13) | 1014(5) | 3791(4)  | 5803(4) | 28(2) |
| C(14) | 1051(5) | 4693(4)  | 6010(4) | 23(2) |
| C(15) | 1960(5) | 5046(3)  | 6464(4) | 21(2) |
| C(16) | 2261(5) | 5949(4)  | 6735(4) | 21(2) |
| C(17) | 2513(5) | 7460(4)  | 6524(4) | 23(2) |

|       |         |         |          |       |
|-------|---------|---------|----------|-------|
| C(18) | 2519(5) | 8282(4) | 5979(4)  | 23(2) |
| C(19) | 1749(5) | 8677(4) | 5362(4)  | 28(2) |
| C(20) | 2026(5) | 9423(4) | 4872(4)  | 29(2) |
| C(21) | 3022(5) | 9759(4) | 4993(4)  | 26(2) |
| C(22) | 3788(5) | 9366(3) | 5590(4)  | 22(2) |
| C(23) | 3517(5) | 8622(4) | 6089(4)  | 21(2) |
| C(24) | 4141(5) | 8029(3) | 6714(4)  | 19(2) |
| C(25) | 3797(5) | 7525(4) | 9050(4)  | 22(2) |
| C(26) | 3005(6) | 8109(4) | 9134(4)  | 37(2) |
| C(27) | 3170(7) | 8886(5) | 9631(5)  | 51(2) |
| C(28) | 4140(8) | 9082(5) | 10041(5) | 57(3) |
| C(29) | 4924(7) | 8503(5) | 9964(4)  | 50(2) |
| C(30) | 4769(6) | 7710(4) | 9463(4)  | 34(2) |
| B(1)  | 3790(6) | 6653(4) | 7646(5)  | 23(2) |

---



Table S 45. Bond lengths [Å] and angles [°] for **PhO-Cl<sub>6</sub>BsubPc**  
(**Dichlorobenzene:Dimethoxybenzene:Pentane**; CCDC deposit 2087098).

---

|             |          |
|-------------|----------|
| Cl(1)-C(4)  | 1.730(6) |
| Cl(2)-C(5)  | 1.730(6) |
| Cl(3)-C(12) | 1.721(6) |
| Cl(4)-C(13) | 1.723(6) |
| Cl(5)-C(20) | 1.726(6) |
| Cl(6)-C(21) | 1.740(6) |
| O(1)-C(25)  | 1.379(6) |
| O(1)-B(1)   | 1.415(7) |
| N(1)-C(1)   | 1.357(7) |
| N(1)-C(8)   | 1.371(7) |
| N(1)-B(1)   | 1.490(8) |
| N(2)-C(9)   | 1.340(7) |
| N(2)-C(8)   | 1.354(7) |
| N(3)-C(16)  | 1.349(7) |
| N(3)-C(9)   | 1.367(6) |
| N(3)-B(1)   | 1.498(7) |
| N(4)-C(17)  | 1.344(7) |
| N(4)-C(16)  | 1.358(6) |
| N(5)-C(24)  | 1.368(7) |
| N(5)-C(17)  | 1.374(7) |
| N(5)-B(1)   | 1.498(7) |
| N(6)-C(1)   | 1.342(7) |
| N(6)-C(24)  | 1.351(7) |
| C(1)-C(2)   | 1.475(8) |
| C(2)-C(3)   | 1.374(8) |
| C(2)-C(7)   | 1.414(7) |
| C(3)-C(4)   | 1.374(8) |
| C(3)-H(3A)  | 0.9500   |
| C(4)-C(5)   | 1.396(8) |
| C(5)-C(6)   | 1.390(8) |
| C(6)-C(7)   | 1.375(8) |
| C(6)-H(6A)  | 0.9500   |

|                 |           |
|-----------------|-----------|
| C(7)-C(8)       | 1.453(8)  |
| C(9)-C(10)      | 1.463(7)  |
| C(10)-C(11)     | 1.385(7)  |
| C(10)-C(15)     | 1.416(7)  |
| C(11)-C(12)     | 1.386(7)  |
| C(11)-H(11A)    | 0.9500    |
| C(12)-C(13)     | 1.395(8)  |
| C(13)-C(14)     | 1.377(7)  |
| C(14)-C(15)     | 1.398(7)  |
| C(14)-H(14A)    | 0.9500    |
| C(15)-C(16)     | 1.444(7)  |
| C(17)-C(18)     | 1.460(7)  |
| C(18)-C(23)     | 1.395(8)  |
| C(18)-C(19)     | 1.402(7)  |
| C(19)-C(20)     | 1.392(7)  |
| C(19)-H(19A)    | 0.9500    |
| C(20)-C(21)     | 1.391(8)  |
| C(21)-C(22)     | 1.381(7)  |
| C(22)-C(23)     | 1.395(7)  |
| C(22)-H(22A)    | 0.9500    |
| C(23)-C(24)     | 1.453(7)  |
| C(25)-C(26)     | 1.371(8)  |
| C(25)-C(30)     | 1.373(8)  |
| C(26)-C(27)     | 1.370(8)  |
| C(26)-H(26A)    | 0.9500    |
| C(27)-C(28)     | 1.374(10) |
| C(27)-H(27A)    | 0.9500    |
| C(28)-C(29)     | 1.357(10) |
| C(28)-H(28A)    | 0.9500    |
| C(29)-C(30)     | 1.391(8)  |
| C(29)-H(29A)    | 0.9500    |
| C(30)-H(30A)    | 0.9500    |
| C(25)-O(1)-B(1) | 120.3(4)  |
| C(1)-N(1)-C(8)  | 112.3(5)  |
| C(1)-N(1)-B(1)  | 124.7(5)  |

|                  |          |
|------------------|----------|
| C(8)-N(1)-B(1)   | 122.2(5) |
| C(9)-N(2)-C(8)   | 116.0(5) |
| C(16)-N(3)-C(9)  | 113.5(5) |
| C(16)-N(3)-B(1)  | 123.2(5) |
| C(9)-N(3)-B(1)   | 122.4(5) |
| C(17)-N(4)-C(16) | 116.7(5) |
| C(24)-N(5)-C(17) | 112.9(5) |
| C(24)-N(5)-B(1)  | 123.9(5) |
| C(17)-N(5)-B(1)  | 121.8(5) |
| C(1)-N(6)-C(24)  | 116.9(5) |
| N(6)-C(1)-N(1)   | 122.0(6) |
| N(6)-C(1)-C(2)   | 130.1(6) |
| N(1)-C(1)-C(2)   | 106.4(5) |
| C(3)-C(2)-C(7)   | 121.6(6) |
| C(3)-C(2)-C(1)   | 132.6(6) |
| C(7)-C(2)-C(1)   | 105.8(6) |
| C(2)-C(3)-C(4)   | 117.1(6) |
| C(2)-C(3)-H(3A)  | 121.4    |
| C(4)-C(3)-H(3A)  | 121.4    |
| C(3)-C(4)-C(5)   | 122.1(6) |
| C(3)-C(4)-Cl(1)  | 118.9(5) |
| C(5)-C(4)-Cl(1)  | 119.0(5) |
| C(6)-C(5)-C(4)   | 120.6(6) |
| C(6)-C(5)-Cl(2)  | 117.3(5) |
| C(4)-C(5)-Cl(2)  | 122.1(5) |
| C(7)-C(6)-C(5)   | 117.7(6) |
| C(7)-C(6)-H(6A)  | 121.1    |
| C(5)-C(6)-H(6A)  | 121.1    |
| C(6)-C(7)-C(2)   | 120.6(6) |
| C(6)-C(7)-C(8)   | 131.3(6) |
| C(2)-C(7)-C(8)   | 108.0(5) |
| N(2)-C(8)-N(1)   | 122.9(6) |
| N(2)-C(8)-C(7)   | 130.0(6) |
| N(1)-C(8)-C(7)   | 105.6(5) |
| N(2)-C(9)-N(3)   | 123.6(5) |
| N(2)-C(9)-C(10)  | 130.0(5) |

|                    |          |
|--------------------|----------|
| N(3)-C(9)-C(10)    | 105.4(5) |
| C(11)-C(10)-C(15)  | 121.0(6) |
| C(11)-C(10)-C(9)   | 132.6(6) |
| C(15)-C(10)-C(9)   | 106.1(5) |
| C(10)-C(11)-C(12)  | 118.5(6) |
| C(10)-C(11)-H(11A) | 120.8    |
| C(12)-C(11)-H(11A) | 120.8    |
| C(11)-C(12)-C(13)  | 120.5(5) |
| C(11)-C(12)-Cl(3)  | 118.7(5) |
| C(13)-C(12)-Cl(3)  | 120.8(5) |
| C(14)-C(13)-C(12)  | 121.6(6) |
| C(14)-C(13)-Cl(4)  | 118.3(5) |
| C(12)-C(13)-Cl(4)  | 120.1(5) |
| C(13)-C(14)-C(15)  | 118.5(5) |
| C(13)-C(14)-H(14A) | 120.7    |
| C(15)-C(14)-H(14A) | 120.7    |
| C(14)-C(15)-C(10)  | 119.5(5) |
| C(14)-C(15)-C(16)  | 132.2(6) |
| C(10)-C(15)-C(16)  | 108.1(5) |
| N(3)-C(16)-N(4)    | 122.1(5) |
| N(3)-C(16)-C(15)   | 105.4(5) |
| N(4)-C(16)-C(15)   | 130.9(5) |
| N(4)-C(17)-N(5)    | 122.8(5) |
| N(4)-C(17)-C(18)   | 130.4(6) |
| N(5)-C(17)-C(18)   | 104.9(5) |
| C(23)-C(18)-C(19)  | 121.3(5) |
| C(23)-C(18)-C(17)  | 107.8(5) |
| C(19)-C(18)-C(17)  | 130.7(6) |
| C(20)-C(19)-C(18)  | 116.9(6) |
| C(20)-C(19)-H(19A) | 121.5    |
| C(18)-C(19)-H(19A) | 121.5    |
| C(21)-C(20)-C(19)  | 121.3(6) |
| C(21)-C(20)-Cl(5)  | 120.8(5) |
| C(19)-C(20)-Cl(5)  | 117.9(5) |
| C(22)-C(21)-C(20)  | 122.2(5) |
| C(22)-C(21)-Cl(6)  | 117.6(5) |

|                    |          |
|--------------------|----------|
| C(20)-C(21)-Cl(6)  | 120.2(5) |
| C(21)-C(22)-C(23)  | 117.0(6) |
| C(21)-C(22)-H(22A) | 121.5    |
| C(23)-C(22)-H(22A) | 121.5    |
| C(18)-C(23)-C(22)  | 121.4(5) |
| C(18)-C(23)-C(24)  | 107.8(5) |
| C(22)-C(23)-C(24)  | 130.7(6) |
| N(6)-C(24)-N(5)    | 122.3(5) |
| N(6)-C(24)-C(23)   | 130.6(6) |
| N(5)-C(24)-C(23)   | 105.5(5) |
| C(26)-C(25)-C(30)  | 120.6(6) |
| C(26)-C(25)-O(1)   | 118.5(6) |
| C(30)-C(25)-O(1)   | 120.9(6) |
| C(27)-C(26)-C(25)  | 120.5(7) |
| C(27)-C(26)-H(26A) | 119.7    |
| C(25)-C(26)-H(26A) | 119.7    |
| C(26)-C(27)-C(28)  | 119.5(7) |
| C(26)-C(27)-H(27A) | 120.3    |
| C(28)-C(27)-H(27A) | 120.3    |
| C(29)-C(28)-C(27)  | 120.1(7) |
| C(29)-C(28)-H(28A) | 120.0    |
| C(27)-C(28)-H(28A) | 120.0    |
| C(28)-C(29)-C(30)  | 121.1(7) |
| C(28)-C(29)-H(29A) | 119.4    |
| C(30)-C(29)-H(29A) | 119.4    |
| C(25)-C(30)-C(29)  | 118.2(7) |
| C(25)-C(30)-H(30A) | 120.9    |
| C(29)-C(30)-H(30A) | 120.9    |
| O(1)-B(1)-N(1)     | 118.3(5) |
| O(1)-B(1)-N(3)     | 109.1(5) |
| N(1)-B(1)-N(3)     | 104.1(5) |
| O(1)-B(1)-N(5)     | 117.1(5) |
| N(1)-B(1)-N(5)     | 102.8(5) |
| N(3)-B(1)-N(5)     | 103.8(5) |

---

Symmetry transformations used to generate equivalent atoms:

Table S 46. Anisotropic displacement parameters ( $\text{\AA}^2 \times 10^3$ ) for **PhO-Cl<sub>6</sub>BsubPc** (**Dichlorobenzene:Dimethoxybenzene: Pentane; CCDC deposit 2087098**). The anisotropic displacement factor exponent takes the form:  $-2\pi^2 [ h^2 a^{*2} U^{11} + \dots + 2 h k a^* b^* U^{12} ]$

|       | U <sup>11</sup> | U <sup>22</sup> | U <sup>33</sup> | U <sup>23</sup> | U <sup>13</sup> | U <sup>12</sup> |
|-------|-----------------|-----------------|-----------------|-----------------|-----------------|-----------------|
| Cl(1) | 22(1)           | 65(1)           | 79(1)           | 10(1)           | 15(1)           | -7(1)           |
| Cl(2) | 26(1)           | 56(1)           | 61(1)           | 5(1)            | 11(1)           | 10(1)           |
| Cl(3) | 54(1)           | 25(1)           | 46(1)           | -10(1)          | -9(1)           | 5(1)            |
| Cl(4) | 33(1)           | 30(1)           | 56(1)           | -7(1)           | -10(1)          | -9(1)           |
| Cl(5) | 43(1)           | 50(1)           | 55(1)           | 22(1)           | -11(1)          | 5(1)            |
| Cl(6) | 48(1)           | 27(1)           | 37(1)           | 9(1)            | 12(1)           | 2(1)            |
| O(1)  | 34(3)           | 30(2)           | 18(2)           | -2(2)           | 7(2)            | -10(2)          |
| N(1)  | 20(3)           | 19(3)           | 18(3)           | 2(2)            | 0(2)            | 0(3)            |
| N(2)  | 24(4)           | 18(3)           | 25(3)           | 5(2)            | 2(3)            | 0(3)            |
| N(3)  | 18(4)           | 17(3)           | 22(3)           | 3(2)            | 0(3)            | -1(2)           |
| N(4)  | 21(3)           | 18(3)           | 24(3)           | -2(2)           | -1(2)           | -1(3)           |
| N(5)  | 15(3)           | 18(3)           | 22(3)           | -1(2)           | -2(3)           | -8(2)           |
| N(6)  | 26(4)           | 25(3)           | 19(3)           | -3(2)           | 2(3)            | -10(3)          |
| C(1)  | 25(5)           | 19(4)           | 22(4)           | 2(3)            | -6(3)           | -13(3)          |
| C(2)  | 28(5)           | 25(4)           | 17(4)           | 1(3)            | -2(3)           | -3(3)           |
| C(3)  | 23(5)           | 30(4)           | 25(4)           | -1(3)           | 4(3)            | -8(3)           |
| C(4)  | 9(4)            | 48(5)           | 31(4)           | 4(3)            | 7(3)            | -5(3)           |
| C(5)  | 27(5)           | 43(5)           | 26(4)           | 3(3)            | 4(3)            | 7(4)            |
| C(6)  | 32(5)           | 31(4)           | 18(4)           | 0(3)            | -1(3)           | -7(4)           |
| C(7)  | 16(4)           | 32(4)           | 17(3)           | 2(3)            | 2(3)            | -1(3)           |
| C(8)  | 24(5)           | 28(4)           | 14(3)           | 4(3)            | -4(3)           | 6(3)            |
| C(9)  | 19(4)           | 21(4)           | 17(3)           | 0(3)            | -1(3)           | 1(3)            |
| C(10) | 23(4)           | 21(4)           | 25(4)           | 1(3)            | 2(3)            | 2(3)            |
| C(11) | 28(5)           | 22(4)           | 26(4)           | 0(3)            | 5(3)            | 4(3)            |
| C(12) | 38(5)           | 25(4)           | 29(4)           | -1(3)           | 0(4)            | -2(4)           |
| C(13) | 26(5)           | 30(4)           | 26(4)           | -3(3)           | -4(3)           | -13(3)          |
| C(14) | 19(4)           | 19(3)           | 31(4)           | 6(3)            | 3(3)            | 4(3)            |
| C(15) | 25(4)           | 14(3)           | 23(4)           | -1(3)           | 0(3)            | -9(3)           |
| C(16) | 14(4)           | 29(4)           | 19(4)           | 3(3)            | 3(3)            | 0(3)            |
| C(17) | 24(4)           | 22(4)           | 23(4)           | -3(3)           | 6(3)            | -2(3)           |

|       |        |       |       |        |       |        |
|-------|--------|-------|-------|--------|-------|--------|
| C(18) | 33(5)  | 17(3) | 22(4) | -2(3)  | 7(3)  | 2(3)   |
| C(19) | 30(5)  | 22(4) | 33(4) | -7(3)  | 2(3)  | -7(3)  |
| C(20) | 31(5)  | 28(4) | 26(4) | 3(3)   | -3(3) | 8(3)   |
| C(21) | 39(5)  | 19(3) | 22(4) | 2(3)   | 12(3) | 0(3)   |
| C(22) | 27(4)  | 17(3) | 21(4) | -11(3) | 8(3)  | -6(3)  |
| C(23) | 23(4)  | 19(3) | 21(4) | -4(3)  | 5(3)  | -3(3)  |
| C(24) | 26(5)  | 15(3) | 16(3) | -5(3)  | 2(3)  | -5(3)  |
| C(25) | 30(5)  | 23(4) | 13(4) | 0(3)   | 8(3)  | -3(3)  |
| C(26) | 52(6)  | 37(4) | 24(4) | 0(3)   | 15(4) | 1(4)   |
| C(27) | 70(7)  | 55(5) | 31(5) | 4(4)   | 21(5) | 9(5)   |
| C(28) | 119(9) | 33(5) | 22(4) | -9(3)  | 17(5) | -15(5) |
| C(29) | 73(7)  | 60(6) | 16(4) | 4(4)   | -4(4) | -28(5) |
| C(30) | 43(6)  | 38(4) | 21(4) | 3(3)   | 4(4)  | -7(4)  |
| B(1)  | 16(5)  | 20(4) | 30(5) | 3(3)   | -1(4) | -7(4)  |

---

Table S 47. Hydrogen coordinates ( $\times 10^4$ ) and isotropic displacement parameters ( $\text{\AA}^2 \times 10^{-3}$ ) for **PhO-Cl<sub>6</sub>BsubPc** (**Dichlorobenzene:Dimethoxybenzene:Pentane; CCDC deposit 2087098**).

|        | x    | y    | z     | U(eq) |
|--------|------|------|-------|-------|
| H(3A)  | 7561 | 7595 | 6843  | 31    |
| H(6A)  | 6997 | 4509 | 7364  | 33    |
| H(11A) | 3389 | 3223 | 6499  | 30    |
| H(14A) | 472  | 5068 | 5847  | 28    |
| H(19A) | 1070 | 8445 | 5281  | 34    |
| H(22A) | 4470 | 9593 | 5657  | 26    |
| H(26A) | 2337 | 7973 | 8845  | 44    |
| H(27A) | 2618 | 9286 | 9692  | 61    |
| H(28A) | 4262 | 9624 | 10379 | 69    |
| H(29A) | 5590 | 8641 | 10257 | 61    |
| H(30A) | 5320 | 7307 | 9408  | 41    |



Table S 48. Torsion angles [°] for **PhO-Cl<sub>6</sub>BsubPc (Dichlorobenzene:Dimethoxybenzene: Pentane; CCDC deposit 2087098)**.

---

|                       |           |
|-----------------------|-----------|
| C(24)-N(6)-C(1)-N(1)  | -6.1(8)   |
| C(24)-N(6)-C(1)-C(2)  | 158.3(5)  |
| C(8)-N(1)-C(1)-N(6)   | 154.4(5)  |
| B(1)-N(1)-C(1)-N(6)   | -15.7(8)  |
| C(8)-N(1)-C(1)-C(2)   | -13.2(6)  |
| B(1)-N(1)-C(1)-C(2)   | 176.7(5)  |
| N(6)-C(1)-C(2)-C(3)   | 20.6(10)  |
| N(1)-C(1)-C(2)-C(3)   | -173.2(6) |
| N(6)-C(1)-C(2)-C(7)   | -159.5(5) |
| N(1)-C(1)-C(2)-C(7)   | 6.7(6)    |
| C(7)-C(2)-C(3)-C(4)   | -3.9(8)   |
| C(1)-C(2)-C(3)-C(4)   | 176.0(5)  |
| C(2)-C(3)-C(4)-C(5)   | 3.9(9)    |
| C(2)-C(3)-C(4)-Cl(1)  | -175.8(4) |
| C(3)-C(4)-C(5)-C(6)   | 0.0(9)    |
| Cl(1)-C(4)-C(5)-C(6)  | 179.7(4)  |
| C(3)-C(4)-C(5)-Cl(2)  | -179.5(5) |
| Cl(1)-C(4)-C(5)-Cl(2) | 0.2(7)    |
| C(4)-C(5)-C(6)-C(7)   | -3.9(8)   |
| Cl(2)-C(5)-C(6)-C(7)  | 175.6(4)  |
| C(5)-C(6)-C(7)-C(2)   | 3.9(8)    |
| C(5)-C(6)-C(7)-C(8)   | -177.8(6) |
| C(3)-C(2)-C(7)-C(6)   | 0.0(8)    |
| C(1)-C(2)-C(7)-C(6)   | -179.9(5) |
| C(3)-C(2)-C(7)-C(8)   | -178.6(5) |
| C(1)-C(2)-C(7)-C(8)   | 1.4(6)    |
| C(9)-N(2)-C(8)-N(1)   | 6.4(8)    |
| C(9)-N(2)-C(8)-C(7)   | -157.3(6) |
| C(1)-N(1)-C(8)-N(2)   | -153.2(5) |
| B(1)-N(1)-C(8)-N(2)   | 17.3(8)   |
| C(1)-N(1)-C(8)-C(7)   | 14.0(6)   |
| B(1)-N(1)-C(8)-C(7)   | -175.6(5) |

|                         |           |
|-------------------------|-----------|
| C(6)-C(7)-C(8)-N(2)     | -21.6(10) |
| C(2)-C(7)-C(8)-N(2)     | 156.9(5)  |
| C(6)-C(7)-C(8)-N(1)     | 172.5(6)  |
| C(2)-C(7)-C(8)-N(1)     | -9.0(6)   |
| C(8)-N(2)-C(9)-N(3)     | -9.7(8)   |
| C(8)-N(2)-C(9)-C(10)    | 157.5(6)  |
| C(16)-N(3)-C(9)-N(2)    | 158.9(5)  |
| B(1)-N(3)-C(9)-N(2)     | -10.5(9)  |
| C(16)-N(3)-C(9)-C(10)   | -11.0(6)  |
| B(1)-N(3)-C(9)-C(10)    | 179.6(5)  |
| N(2)-C(9)-C(10)-C(11)   | 9.8(11)   |
| N(3)-C(9)-C(10)-C(11)   | 178.8(6)  |
| N(2)-C(9)-C(10)-C(15)   | -164.4(6) |
| N(3)-C(9)-C(10)-C(15)   | 4.6(6)    |
| C(15)-C(10)-C(11)-C(12) | -5.2(9)   |
| C(9)-C(10)-C(11)-C(12)  | -178.7(6) |
| C(10)-C(11)-C(12)-C(13) | 1.5(9)    |
| C(10)-C(11)-C(12)-Cl(3) | 179.7(4)  |
| C(11)-C(12)-C(13)-C(14) | 3.9(9)    |
| Cl(3)-C(12)-C(13)-C(14) | -174.3(4) |
| C(11)-C(12)-C(13)-Cl(4) | -176.8(5) |
| Cl(3)-C(12)-C(13)-Cl(4) | 5.0(8)    |
| C(12)-C(13)-C(14)-C(15) | -5.3(9)   |
| Cl(4)-C(13)-C(14)-C(15) | 175.4(4)  |
| C(13)-C(14)-C(15)-C(10) | 1.5(8)    |
| C(13)-C(14)-C(15)-C(16) | 176.6(6)  |
| C(11)-C(10)-C(15)-C(14) | 3.7(9)    |
| C(9)-C(10)-C(15)-C(14)  | 178.8(5)  |
| C(11)-C(10)-C(15)-C(16) | -172.4(5) |
| C(9)-C(10)-C(15)-C(16)  | 2.6(6)    |
| C(9)-N(3)-C(16)-N(4)    | -154.6(5) |
| B(1)-N(3)-C(16)-N(4)    | 14.7(9)   |
| C(9)-N(3)-C(16)-C(15)   | 12.6(7)   |
| B(1)-N(3)-C(16)-C(15)   | -178.2(5) |
| C(17)-N(4)-C(16)-N(3)   | 9.4(8)    |
| C(17)-N(4)-C(16)-C(15)  | -154.1(6) |

|                         |           |
|-------------------------|-----------|
| C(14)-C(15)-C(16)-N(3)  | 175.6(6)  |
| C(10)-C(15)-C(16)-N(3)  | -8.9(6)   |
| C(14)-C(15)-C(16)-N(4)  | -18.9(11) |
| C(10)-C(15)-C(16)-N(4)  | 156.7(6)  |
| C(16)-N(4)-C(17)-N(5)   | -10.3(8)  |
| C(16)-N(4)-C(17)-C(18)  | 151.5(6)  |
| C(24)-N(5)-C(17)-N(4)   | 154.3(5)  |
| B(1)-N(5)-C(17)-N(4)    | -12.7(9)  |
| C(24)-N(5)-C(17)-C(18)  | -11.4(6)  |
| B(1)-N(5)-C(17)-C(18)   | -178.4(5) |
| N(4)-C(17)-C(18)-C(23)  | -157.0(6) |
| N(5)-C(17)-C(18)-C(23)  | 7.3(6)    |
| N(4)-C(17)-C(18)-C(19)  | 16.8(11)  |
| N(5)-C(17)-C(18)-C(19)  | -179.0(6) |
| C(23)-C(18)-C(19)-C(20) | -0.5(8)   |
| C(17)-C(18)-C(19)-C(20) | -173.5(6) |
| C(18)-C(19)-C(20)-C(21) | 0.0(9)    |
| C(18)-C(19)-C(20)-Cl(5) | 178.7(4)  |
| C(19)-C(20)-C(21)-C(22) | 1.0(9)    |
| Cl(5)-C(20)-C(21)-C(22) | -177.7(4) |
| C(19)-C(20)-C(21)-Cl(6) | 177.6(4)  |
| Cl(5)-C(20)-C(21)-Cl(6) | -1.0(7)   |
| C(20)-C(21)-C(22)-C(23) | -1.4(8)   |
| Cl(6)-C(21)-C(22)-C(23) | -178.1(4) |
| C(19)-C(18)-C(23)-C(22) | 0.0(8)    |
| C(17)-C(18)-C(23)-C(22) | 174.5(5)  |
| C(19)-C(18)-C(23)-C(24) | -175.5(5) |
| C(17)-C(18)-C(23)-C(24) | -1.1(6)   |
| C(21)-C(22)-C(23)-C(18) | 0.9(8)    |
| C(21)-C(22)-C(23)-C(24) | 175.3(5)  |
| C(1)-N(6)-C(24)-N(5)    | 8.4(8)    |
| C(1)-N(6)-C(24)-C(23)   | -154.9(5) |
| C(17)-N(5)-C(24)-N(6)   | -156.1(5) |
| B(1)-N(5)-C(24)-N(6)    | 10.6(8)   |
| C(17)-N(5)-C(24)-C(23)  | 10.8(6)   |
| B(1)-N(5)-C(24)-C(23)   | 177.5(5)  |

|                         |           |
|-------------------------|-----------|
| C(18)-C(23)-C(24)-N(6)  | 159.8(6)  |
| C(22)-C(23)-C(24)-N(6)  | -15.2(10) |
| C(18)-C(23)-C(24)-N(5)  | -5.6(6)   |
| C(22)-C(23)-C(24)-N(5)  | 179.4(5)  |
| B(1)-O(1)-C(25)-C(26)   | 99.5(7)   |
| B(1)-O(1)-C(25)-C(30)   | -83.0(7)  |
| C(30)-C(25)-C(26)-C(27) | -0.1(9)   |
| O(1)-C(25)-C(26)-C(27)  | 177.4(5)  |
| C(25)-C(26)-C(27)-C(28) | 0.6(10)   |
| C(26)-C(27)-C(28)-C(29) | -0.9(11)  |
| C(27)-C(28)-C(29)-C(30) | 0.8(11)   |
| C(26)-C(25)-C(30)-C(29) | -0.1(9)   |
| O(1)-C(25)-C(30)-C(29)  | -177.5(5) |
| C(28)-C(29)-C(30)-C(25) | -0.3(9)   |
| C(25)-O(1)-B(1)-N(1)    | 79.3(7)   |
| C(25)-O(1)-B(1)-N(3)    | -162.1(5) |
| C(25)-O(1)-B(1)-N(5)    | -44.6(8)  |
| C(1)-N(1)-B(1)-O(1)     | -101.6(6) |
| C(8)-N(1)-B(1)-O(1)     | 89.2(6)   |
| C(1)-N(1)-B(1)-N(3)     | 137.2(5)  |
| C(8)-N(1)-B(1)-N(3)     | -32.0(7)  |
| C(1)-N(1)-B(1)-N(5)     | 29.2(7)   |
| C(8)-N(1)-B(1)-N(5)     | -140.0(5) |
| C(16)-N(3)-B(1)-O(1)    | 93.3(7)   |
| C(9)-N(3)-B(1)-O(1)     | -98.3(6)  |
| C(16)-N(3)-B(1)-N(1)    | -139.5(5) |
| C(9)-N(3)-B(1)-N(1)     | 28.9(7)   |
| C(16)-N(3)-B(1)-N(5)    | -32.2(8)  |
| C(9)-N(3)-B(1)-N(5)     | 136.1(5)  |
| C(24)-N(5)-B(1)-O(1)    | 105.1(7)  |
| C(17)-N(5)-B(1)-O(1)    | -89.4(7)  |
| C(24)-N(5)-B(1)-N(1)    | -26.4(7)  |
| C(17)-N(5)-B(1)-N(1)    | 139.1(5)  |
| C(24)-N(5)-B(1)-N(3)    | -134.7(5) |
| C(17)-N(5)-B(1)-N(3)    | 30.9(8)   |

---

Symmetry transformations used to generate equivalent atoms:

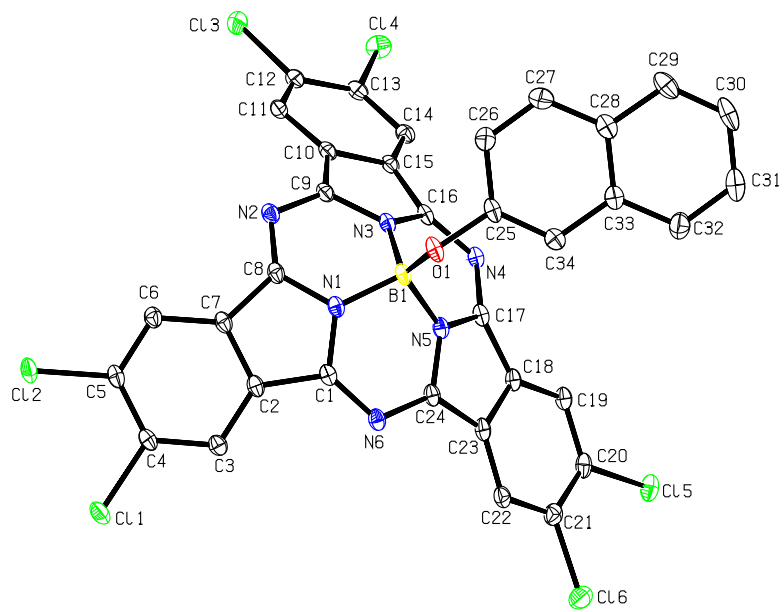

Figure S25: Anisotropic displacement plot of **NaphO-Cl<sub>6</sub>BsubPc** (Toluene:Heptane; CCDC deposit 2087099).

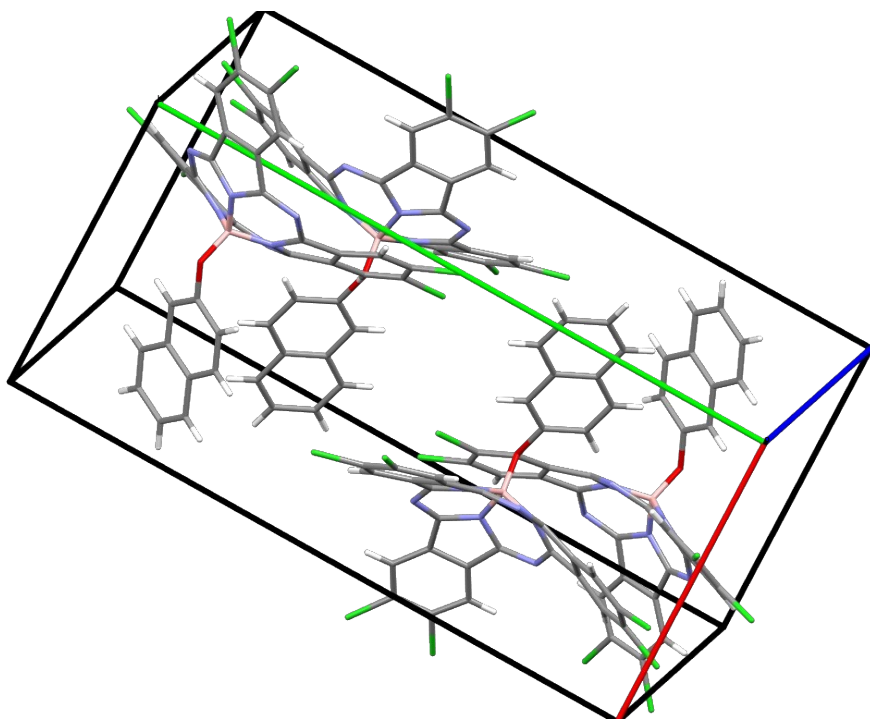

Figure S26: Populated unit cell of **NaphO-Cl<sub>6</sub>BsubPc** (Toluene:Heptane; CCDC deposit 2087099).

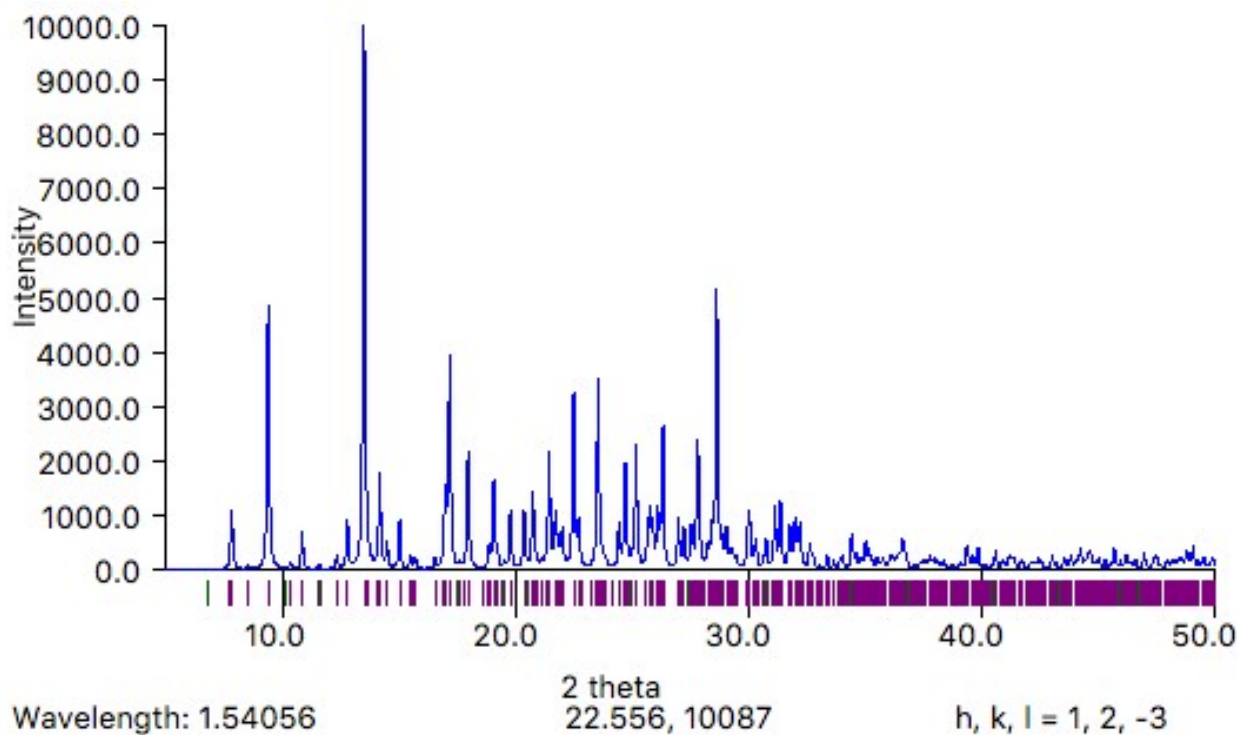

Figure S 27: Powder x-ray diffraction **NaphO-Cl<sub>6</sub>BsubPc** (Toluene:Heptane; CCDC deposit 2087099).

Table S 49. Crystal data and structure refinement for **NaphO-Cl<sub>6</sub>BsubPc (Toluene:Heptane; CCDC deposit 2087099)**.

|                                   |                                                                    |                 |
|-----------------------------------|--------------------------------------------------------------------|-----------------|
| Identification code               | d19200_a                                                           |                 |
| Empirical formula                 | C <sub>34</sub> H <sub>13</sub> B Cl <sub>6</sub> N <sub>6</sub> O |                 |
| Formula weight                    | 745.01                                                             |                 |
| Temperature                       | 150(2) K                                                           |                 |
| Wavelength                        | 0.71073 Å                                                          |                 |
| Crystal system                    | Monoclinic                                                         |                 |
| Space group                       | P2 <sub>1</sub> /c                                                 |                 |
| Unit cell dimensions              | a = 10.4162(2) Å                                                   | α = 90°.        |
|                                   | b = 22.7272(5) Å                                                   | β = 98.322(1)°. |
|                                   | c = 13.1011(3) Å                                                   | γ = 90°.        |
| Volume                            | 3068.78(11) Å <sup>3</sup>                                         |                 |
| Z                                 | 4                                                                  |                 |
| Density (calculated)              | 1.613 Mg/m <sup>3</sup>                                            |                 |
| Absorption coefficient            | 0.603 mm <sup>-1</sup>                                             |                 |
| F(000)                            | 1496                                                               |                 |
| Crystal size                      | 0.230 x 0.170 x 0.110 mm <sup>3</sup>                              |                 |
| Theta range for data collection   | 1.792 to 27.560°.                                                  |                 |
| Index ranges                      | -13<=h<=13, -29<=k<=29, -9<=l<=17                                  |                 |
| Reflections collected             | 38079                                                              |                 |
| Independent reflections           | 7069 [R(int) = 0.0315]                                             |                 |
| Completeness to theta = 25.242°   | 100.0 %                                                            |                 |
| Absorption correction             | Semi-empirical from equivalents                                    |                 |
| Max. and min. transmission        | 0.7456 and 0.6845                                                  |                 |
| Refinement method                 | Full-matrix least-squares on F <sup>2</sup>                        |                 |
| Data / restraints / parameters    | 7069 / 0 / 433                                                     |                 |
| Goodness-of-fit on F <sup>2</sup> | 1.033                                                              |                 |
| Final R indices [I>2sigma(I)]     | R1 = 0.0370, wR2 = 0.0814                                          |                 |
| R indices (all data)              | R1 = 0.0615, wR2 = 0.0950                                          |                 |
| Extinction coefficient            | n/a                                                                |                 |
| Largest diff. peak and hole       | 0.407 and -0.415 e.Å <sup>-3</sup>                                 |                 |

Table S 50. Atomic coordinates ( $\times 10^4$ ) and equivalent isotropic displacement parameters ( $\text{\AA}^2 \times 10^3$ ) for **NaphO-Cl<sub>6</sub>BsubPc (Toluene:Heptane; CCDC deposit 2087099)**.  $U(\text{eq})$  is defined as one third of the trace of the orthogonalized  $U^{ij}$  tensor.

|       | x        | y       | z        | U(eq) |
|-------|----------|---------|----------|-------|
| Cl(1) | 13888(1) | 4561(1) | 6108(1)  | 35(1) |
| Cl(2) | 14027(1) | 3317(1) | 7174(1)  | 38(1) |
| Cl(3) | 9333(1)  | 117(1)  | 3450(1)  | 39(1) |
| Cl(4) | 7507(1)  | 337(1)  | 1356(1)  | 35(1) |
| Cl(5) | 5754(1)  | 4634(1) | -1286(1) | 33(1) |
| Cl(6) | 7250(1)  | 5664(1) | 2(1)     | 39(1) |
| O(1)  | 6141(1)  | 3407(1) | 4704(1)  | 28(1) |
| N(1)  | 8469(2)  | 3449(1) | 4728(1)  | 22(1) |
| N(2)  | 9072(2)  | 2458(1) | 5140(1)  | 26(1) |
| N(3)  | 7336(2)  | 2671(1) | 3789(1)  | 22(1) |
| N(4)  | 6499(2)  | 2836(1) | 2016(1)  | 23(1) |
| N(5)  | 7148(2)  | 3634(1) | 3140(1)  | 23(1) |
| N(6)  | 8689(2)  | 4347(1) | 3836(1)  | 24(1) |
| C(1)  | 9094(2)  | 3962(1) | 4587(2)  | 22(1) |
| C(2)  | 10351(2) | 3920(1) | 5241(2)  | 23(1) |
| C(3)  | 11410(2) | 4299(1) | 5374(2)  | 25(1) |
| C(4)  | 12541(2) | 4105(1) | 5963(2)  | 26(1) |
| C(5)  | 12623(2) | 3543(1) | 6414(2)  | 26(1) |
| C(6)  | 11591(2) | 3155(1) | 6253(2)  | 26(1) |
| C(7)  | 10444(2) | 3348(1) | 5669(2)  | 24(1) |
| C(8)  | 9262(2)  | 3036(1) | 5257(2)  | 24(1) |
| C(9)  | 8172(2)  | 2286(1) | 4354(2)  | 24(1) |
| C(10) | 8133(2)  | 1751(1) | 3759(2)  | 24(1) |
| C(11) | 8787(2)  | 1219(1) | 3954(2)  | 27(1) |
| C(12) | 8605(2)  | 794(1)  | 3198(2)  | 27(1) |
| C(13) | 7805(2)  | 898(1)  | 2251(2)  | 25(1) |
| C(14) | 7194(2)  | 1432(1) | 2032(2)  | 24(1) |
| C(15) | 7352(2)  | 1862(1) | 2794(2)  | 22(1) |
| C(16) | 6927(2)  | 2472(1) | 2806(2)  | 22(1) |
| C(17) | 6666(2)  | 3415(1) | 2188(2)  | 23(1) |



|       |         |         |         |       |
|-------|---------|---------|---------|-------|
| C(18) | 6698(2) | 3910(1) | 1477(2) | 24(1) |
| C(19) | 6233(2) | 3986(1) | 436(2)  | 25(1) |
| C(20) | 6411(2) | 4525(1) | -11(2)  | 27(1) |
| C(21) | 7076(2) | 4985(1) | 559(2)  | 28(1) |
| C(22) | 7564(2) | 4913(1) | 1592(2) | 26(1) |
| C(23) | 7363(2) | 4376(1) | 2050(2) | 25(1) |
| C(24) | 7743(2) | 4164(1) | 3098(2) | 23(1) |
| C(25) | 4891(2) | 3225(1) | 4334(2) | 26(1) |
| C(26) | 4458(2) | 2691(1) | 4720(2) | 32(1) |
| C(27) | 3214(2) | 2504(1) | 4414(2) | 36(1) |
| C(28) | 2354(2) | 2840(1) | 3714(2) | 31(1) |
| C(29) | 1049(2) | 2655(1) | 3368(2) | 40(1) |
| C(30) | 251(2)  | 2986(1) | 2691(2) | 44(1) |
| C(31) | 682(3)  | 3521(1) | 2325(2) | 45(1) |
| C(32) | 1920(3) | 3713(1) | 2639(2) | 41(1) |
| C(33) | 2779(2) | 3375(1) | 3332(2) | 28(1) |
| C(34) | 4088(2) | 3562(1) | 3668(2) | 30(1) |
| B(1)  | 7180(2) | 3294(1) | 4122(2) | 23(1) |

---

Table S 51. Bond lengths [ $\text{\AA}$ ] and angles [ $^\circ$ ] for **NaphO-Cl<sub>6</sub>BsubPc (Toluene:Heptane; CCDC deposit 2087099)**.

---

|             |          |
|-------------|----------|
| Cl(1)-C(4)  | 1.732(2) |
| Cl(2)-C(5)  | 1.725(2) |
| Cl(3)-C(12) | 1.727(2) |
| Cl(4)-C(13) | 1.730(2) |
| Cl(5)-C(20) | 1.729(2) |
| Cl(6)-C(21) | 1.728(2) |
| O(1)-C(25)  | 1.385(2) |
| O(1)-B(1)   | 1.434(3) |
| N(1)-C(1)   | 1.360(3) |
| N(1)-C(8)   | 1.370(3) |
| N(1)-B(1)   | 1.500(3) |
| N(2)-C(8)   | 1.335(3) |
| N(2)-C(9)   | 1.346(3) |
| N(3)-C(9)   | 1.372(3) |
| N(3)-C(16)  | 1.373(3) |
| N(3)-B(1)   | 1.498(3) |
| N(4)-C(17)  | 1.341(3) |
| N(4)-C(16)  | 1.350(3) |
| N(5)-C(24)  | 1.360(3) |
| N(5)-C(17)  | 1.369(3) |
| N(5)-B(1)   | 1.497(3) |
| N(6)-C(1)   | 1.339(3) |
| N(6)-C(24)  | 1.343(3) |
| C(1)-C(2)   | 1.461(3) |
| C(2)-C(3)   | 1.391(3) |
| C(2)-C(7)   | 1.415(3) |
| C(3)-C(4)   | 1.384(3) |
| C(3)-H(3A)  | 0.9300   |
| C(4)-C(5)   | 1.404(3) |
| C(5)-C(6)   | 1.384(3) |
| C(6)-C(7)   | 1.393(3) |
| C(6)-H(6A)  | 0.9300   |

|              |          |
|--------------|----------|
| C(7)-C(8)    | 1.454(3) |
| C(9)-C(10)   | 1.444(3) |
| C(10)-C(11)  | 1.392(3) |
| C(10)-C(15)  | 1.423(3) |
| C(11)-C(12)  | 1.376(3) |
| C(11)-H(11A) | 0.9300   |
| C(12)-C(13)  | 1.410(3) |
| C(13)-C(14)  | 1.381(3) |
| C(14)-C(15)  | 1.391(3) |
| C(14)-H(14A) | 0.9300   |
| C(15)-C(16)  | 1.455(3) |
| C(17)-C(18)  | 1.464(3) |
| C(18)-C(19)  | 1.390(3) |
| C(18)-C(23)  | 1.421(3) |
| C(19)-C(20)  | 1.382(3) |
| C(19)-H(19A) | 0.9300   |
| C(20)-C(21)  | 1.406(3) |
| C(21)-C(22)  | 1.385(3) |
| C(22)-C(23)  | 1.388(3) |
| C(22)-H(22A) | 0.9300   |
| C(23)-C(24)  | 1.455(3) |
| C(25)-C(34)  | 1.355(3) |
| C(25)-C(26)  | 1.415(3) |
| C(26)-C(27)  | 1.367(3) |
| C(26)-H(26A) | 0.9300   |
| C(27)-C(28)  | 1.409(4) |
| C(27)-H(27A) | 0.9300   |
| C(28)-C(33)  | 1.412(3) |
| C(28)-C(29)  | 1.433(3) |
| C(29)-C(30)  | 1.354(4) |
| C(29)-H(29A) | 0.9300   |
| C(30)-C(31)  | 1.404(4) |
| C(30)-H(30A) | 0.9300   |
| C(31)-C(32)  | 1.367(4) |
| C(31)-H(31A) | 0.9300   |
| C(32)-C(33)  | 1.406(3) |

|                  |            |
|------------------|------------|
| C(32)-H(32A)     | 0.9300     |
| C(33)-C(34)      | 1.435(3)   |
| C(34)-H(34A)     | 0.9300     |
| C(25)-O(1)-B(1)  | 120.27(16) |
| C(1)-N(1)-C(8)   | 112.95(17) |
| C(1)-N(1)-B(1)   | 122.66(18) |
| C(8)-N(1)-B(1)   | 122.27(19) |
| C(8)-N(2)-C(9)   | 116.67(19) |
| C(9)-N(3)-C(16)  | 112.56(18) |
| C(9)-N(3)-B(1)   | 122.14(17) |
| C(16)-N(3)-B(1)  | 123.50(18) |
| C(17)-N(4)-C(16) | 116.83(18) |
| C(24)-N(5)-C(17) | 113.22(18) |
| C(24)-N(5)-B(1)  | 122.63(17) |
| C(17)-N(5)-B(1)  | 123.67(18) |
| C(1)-N(6)-C(24)  | 116.54(19) |
| N(6)-C(1)-N(1)   | 123.64(18) |
| N(6)-C(1)-C(2)   | 129.3(2)   |
| N(1)-C(1)-C(2)   | 105.70(18) |
| C(3)-C(2)-C(7)   | 120.87(19) |
| C(3)-C(2)-C(1)   | 131.3(2)   |
| C(7)-C(2)-C(1)   | 107.25(18) |
| C(4)-C(3)-C(2)   | 117.9(2)   |
| C(4)-C(3)-H(3A)  | 121.1      |
| C(2)-C(3)-H(3A)  | 121.1      |
| C(3)-C(4)-C(5)   | 121.3(2)   |
| C(3)-C(4)-Cl(1)  | 118.75(18) |
| C(5)-C(4)-Cl(1)  | 119.93(16) |
| C(6)-C(5)-C(4)   | 121.2(2)   |
| C(6)-C(5)-Cl(2)  | 118.21(18) |
| C(4)-C(5)-Cl(2)  | 120.58(17) |
| C(5)-C(6)-C(7)   | 117.9(2)   |
| C(5)-C(6)-H(6A)  | 121.0      |
| C(7)-C(6)-H(6A)  | 121.0      |
| C(6)-C(7)-C(2)   | 120.7(2)   |

|                    |            |
|--------------------|------------|
| C(6)-C(7)-C(8)     | 131.6(2)   |
| C(2)-C(7)-C(8)     | 107.12(18) |
| N(2)-C(8)-N(1)     | 123.23(18) |
| N(2)-C(8)-C(7)     | 128.7(2)   |
| N(1)-C(8)-C(7)     | 105.71(19) |
| N(2)-C(9)-N(3)     | 123.1(2)   |
| N(2)-C(9)-C(10)    | 128.3(2)   |
| N(3)-C(9)-C(10)    | 106.20(17) |
| C(11)-C(10)-C(15)  | 121.3(2)   |
| C(11)-C(10)-C(9)   | 131.1(2)   |
| C(15)-C(10)-C(9)   | 107.29(19) |
| C(12)-C(11)-C(10)  | 117.6(2)   |
| C(12)-C(11)-H(11A) | 121.2      |
| C(10)-C(11)-H(11A) | 121.2      |
| C(11)-C(12)-C(13)  | 121.2(2)   |
| C(11)-C(12)-Cl(3)  | 118.49(17) |
| C(13)-C(12)-Cl(3)  | 120.25(18) |
| C(14)-C(13)-C(12)  | 121.7(2)   |
| C(14)-C(13)-Cl(4)  | 118.27(17) |
| C(12)-C(13)-Cl(4)  | 119.97(18) |
| C(13)-C(14)-C(15)  | 117.76(19) |
| C(13)-C(14)-H(14A) | 121.1      |
| C(15)-C(14)-H(14A) | 121.1      |
| C(14)-C(15)-C(10)  | 120.3(2)   |
| C(14)-C(15)-C(16)  | 132.31(19) |
| C(10)-C(15)-C(16)  | 107.24(18) |
| N(4)-C(16)-N(3)    | 122.77(19) |
| N(4)-C(16)-C(15)   | 130.01(19) |
| N(3)-C(16)-C(15)   | 105.62(18) |
| N(4)-C(17)-N(5)    | 122.13(19) |
| N(4)-C(17)-C(18)   | 131.30(19) |
| N(5)-C(17)-C(18)   | 105.16(18) |
| C(19)-C(18)-C(23)  | 120.0(2)   |
| C(19)-C(18)-C(17)  | 133.1(2)   |
| C(23)-C(18)-C(17)  | 106.92(18) |
| C(20)-C(19)-C(18)  | 118.5(2)   |

|                    |            |
|--------------------|------------|
| C(20)-C(19)-H(19A) | 120.8      |
| C(18)-C(19)-H(19A) | 120.8      |
| C(19)-C(20)-C(21)  | 121.3(2)   |
| C(19)-C(20)-Cl(5)  | 118.48(17) |
| C(21)-C(20)-Cl(5)  | 120.16(18) |
| C(22)-C(21)-C(20)  | 121.0(2)   |
| C(22)-C(21)-Cl(6)  | 118.10(18) |
| C(20)-C(21)-Cl(6)  | 120.90(18) |
| C(21)-C(22)-C(23)  | 117.9(2)   |
| C(21)-C(22)-H(22A) | 121.0      |
| C(23)-C(22)-H(22A) | 121.0      |
| C(22)-C(23)-C(18)  | 121.3(2)   |
| C(22)-C(23)-C(24)  | 131.4(2)   |
| C(18)-C(23)-C(24)  | 107.25(19) |
| N(6)-C(24)-N(5)    | 122.46(19) |
| N(6)-C(24)-C(23)   | 130.4(2)   |
| N(5)-C(24)-C(23)   | 105.59(18) |
| C(34)-C(25)-O(1)   | 121.2(2)   |
| C(34)-C(25)-C(26)  | 121.1(2)   |
| O(1)-C(25)-C(26)   | 117.6(2)   |
| C(27)-C(26)-C(25)  | 119.9(2)   |
| C(27)-C(26)-H(26A) | 120.0      |
| C(25)-C(26)-H(26A) | 120.0      |
| C(26)-C(27)-C(28)  | 120.6(2)   |
| C(26)-C(27)-H(27A) | 119.7      |
| C(28)-C(27)-H(27A) | 119.7      |
| C(27)-C(28)-C(33)  | 119.6(2)   |
| C(27)-C(28)-C(29)  | 122.2(2)   |
| C(33)-C(28)-C(29)  | 118.2(2)   |
| C(30)-C(29)-C(28)  | 120.6(3)   |
| C(30)-C(29)-H(29A) | 119.7      |
| C(28)-C(29)-H(29A) | 119.7      |
| C(29)-C(30)-C(31)  | 120.6(2)   |
| C(29)-C(30)-H(30A) | 119.7      |
| C(31)-C(30)-H(30A) | 119.7      |
| C(32)-C(31)-C(30)  | 120.5(3)   |

|                    |            |
|--------------------|------------|
| C(32)-C(31)-H(31A) | 119.8      |
| C(30)-C(31)-H(31A) | 119.8      |
| C(31)-C(32)-C(33)  | 120.4(3)   |
| C(31)-C(32)-H(32A) | 119.8      |
| C(33)-C(32)-H(32A) | 119.8      |
| C(32)-C(33)-C(28)  | 119.8(2)   |
| C(32)-C(33)-C(34)  | 121.6(2)   |
| C(28)-C(33)-C(34)  | 118.7(2)   |
| C(25)-C(34)-C(33)  | 120.0(2)   |
| C(25)-C(34)-H(34A) | 120.0      |
| C(33)-C(34)-H(34A) | 120.0      |
| O(1)-B(1)-N(5)     | 116.04(19) |
| O(1)-B(1)-N(3)     | 116.55(19) |
| N(5)-B(1)-N(3)     | 103.19(17) |
| O(1)-B(1)-N(1)     | 111.28(17) |
| N(5)-B(1)-N(1)     | 103.87(18) |
| N(3)-B(1)-N(1)     | 104.50(18) |

---

Symmetry transformations used to generate equivalent atoms:

Table S 52. Anisotropic displacement parameters ( $\text{\AA}^2 \times 10^3$ ) for **NaphO-Cl<sub>6</sub>BsubPc (Toluene:Heptane; CCDC deposit 2087099)**. The anisotropic displacement factor exponent takes the form:  $-2\pi^2 [ h^2 a^{*2} U^{11} + \dots + 2 h k a^* b^* U^{12} ]$

|       | $U^{11}$ | $U^{22}$ | $U^{33}$ | $U^{23}$ | $U^{13}$ | $U^{12}$ |
|-------|----------|----------|----------|----------|----------|----------|
| Cl(1) | 23(1)    | 39(1)    | 40(1)    | -4(1)    | -2(1)    | -9(1)    |
| Cl(2) | 22(1)    | 50(1)    | 38(1)    | 6(1)     | -9(1)    | -2(1)    |
| Cl(3) | 30(1)    | 31(1)    | 54(1)    | 3(1)     | -2(1)    | 4(1)     |
| Cl(4) | 42(1)    | 31(1)    | 32(1)    | -6(1)    | 9(1)     | 0(1)     |
| Cl(5) | 29(1)    | 47(1)    | 23(1)    | 3(1)     | 2(1)     | 11(1)    |
| Cl(6) | 41(1)    | 35(1)    | 40(1)    | 8(1)     | 6(1)     | 4(1)     |
| O(1)  | 16(1)    | 45(1)    | 22(1)    | -10(1)   | 1(1)     | -2(1)    |
| N(1)  | 18(1)    | 30(1)    | 19(1)    | -4(1)    | 1(1)     | 0(1)     |
| N(2)  | 22(1)    | 34(1)    | 20(1)    | 2(1)     | 0(1)     | -5(1)    |
| N(3)  | 16(1)    | 30(1)    | 19(1)    | -2(1)    | 0(1)     | -2(1)    |
| N(4)  | 17(1)    | 29(1)    | 23(1)    | -2(1)    | 0(1)     | 1(1)     |
| N(5)  | 19(1)    | 28(1)    | 20(1)    | -5(1)    | -1(1)    | 2(1)     |
| N(6)  | 20(1)    | 27(1)    | 24(1)    | -7(1)    | 0(1)     | 2(1)     |
| C(1)  | 18(1)    | 27(1)    | 22(1)    | -7(1)    | 2(1)     | 1(1)     |
| C(2)  | 19(1)    | 31(1)    | 20(1)    | -6(1)    | 1(1)     | 0(1)     |
| C(3)  | 24(1)    | 27(1)    | 24(1)    | -6(1)    | 2(1)     | -2(1)    |
| C(4)  | 20(1)    | 34(1)    | 23(1)    | -7(1)    | 1(1)     | -5(1)    |
| C(5)  | 18(1)    | 38(1)    | 22(1)    | -3(1)    | -1(1)    | -1(1)    |
| C(6)  | 22(1)    | 33(1)    | 21(1)    | 1(1)     | 0(1)     | -1(1)    |
| C(7)  | 20(1)    | 33(1)    | 17(1)    | -4(1)    | 1(1)     | -3(1)    |
| C(8)  | 20(1)    | 35(1)    | 16(1)    | -1(1)    | 1(1)     | -2(1)    |
| C(9)  | 18(1)    | 32(1)    | 21(1)    | 1(1)     | 2(1)     | -5(1)    |
| C(10) | 17(1)    | 30(1)    | 23(1)    | 0(1)     | 3(1)     | -6(1)    |
| C(11) | 19(1)    | 32(1)    | 28(1)    | 6(1)     | -1(1)    | -6(1)    |
| C(12) | 19(1)    | 28(1)    | 35(1)    | 4(1)     | 6(1)     | -2(1)    |
| C(13) | 22(1)    | 30(1)    | 26(1)    | -4(1)    | 7(1)     | -5(1)    |
| C(14) | 21(1)    | 30(1)    | 20(1)    | 0(1)     | 5(1)     | -4(1)    |
| C(15) | 17(1)    | 28(1)    | 22(1)    | 0(1)     | 4(1)     | -4(1)    |
| C(16) | 14(1)    | 32(1)    | 21(1)    | -5(1)    | 0(1)     | -3(1)    |
| C(17) | 16(1)    | 32(1)    | 21(1)    | -5(1)    | 1(1)     | 2(1)     |



|       |       |       |       |        |       |        |
|-------|-------|-------|-------|--------|-------|--------|
| C(18) | 17(1) | 30(1) | 24(1) | -3(1)  | 1(1)  | 5(1)   |
| C(19) | 20(1) | 32(1) | 23(1) | -4(1)  | 1(1)  | 5(1)   |
| C(20) | 19(1) | 39(1) | 22(1) | -2(1)  | 4(1)  | 10(1)  |
| C(21) | 22(1) | 31(1) | 32(1) | 2(1)   | 7(1)  | 7(1)   |
| C(22) | 18(1) | 29(1) | 31(1) | -2(1)  | 1(1)  | 3(1)   |
| C(23) | 17(1) | 31(1) | 26(1) | -5(1)  | 1(1)  | 6(1)   |
| C(24) | 17(1) | 29(1) | 24(1) | -6(1)  | 2(1)  | 4(1)   |
| C(25) | 17(1) | 39(1) | 21(1) | -10(1) | 2(1)  | 1(1)   |
| C(26) | 29(1) | 38(1) | 29(1) | 1(1)   | 3(1)  | 3(1)   |
| C(27) | 38(1) | 35(1) | 36(1) | 0(1)   | 9(1)  | -6(1)  |
| C(28) | 26(1) | 40(1) | 26(1) | -9(1)  | 7(1)  | -1(1)  |
| C(29) | 29(1) | 57(2) | 37(1) | -14(1) | 11(1) | -10(1) |
| C(30) | 18(1) | 76(2) | 38(1) | -22(1) | 3(1)  | -2(1)  |
| C(31) | 30(1) | 64(2) | 39(1) | -10(1) | -5(1) | 12(1)  |
| C(32) | 34(1) | 44(2) | 44(2) | 2(1)   | -2(1) | 7(1)   |
| C(33) | 25(1) | 35(1) | 26(1) | -6(1)  | 3(1)  | 4(1)   |
| C(34) | 27(1) | 33(1) | 30(1) | -2(1)  | 4(1)  | -2(1)  |
| B(1)  | 17(1) | 32(1) | 20(1) | -5(1)  | -2(1) | -1(1)  |

---

Table S 53. Hydrogen coordinates ( $\times 10^4$ ) and isotropic displacement parameters ( $\text{\AA}^2 \times 10^{-3}$ ) for **NaphO-Cl<sub>6</sub>BsubPc (Toluene:Heptane; CCDC deposit 2087099)**.

|        | x     | y    | z    | U(eq) |
|--------|-------|------|------|-------|
| H(3A)  | 11359 | 4672 | 5077 | 30    |
| H(6A)  | 11661 | 2776 | 6526 | 31    |
| H(11A) | 9328  | 1153 | 4573 | 32    |
| H(14A) | 6694  | 1501 | 1396 | 28    |
| H(19A) | 5813  | 3681 | 49   | 30    |
| H(22A) | 8013  | 5215 | 1967 | 32    |
| H(26A) | 5019  | 2467 | 5183 | 39    |
| H(27A) | 2933  | 2153 | 4670 | 44    |
| H(29A) | 746   | 2304 | 3612 | 48    |
| H(30A) | -591  | 2859 | 2466 | 53    |
| H(31A) | 122   | 3747 | 1864 | 54    |
| H(32A) | 2196  | 4068 | 2394 | 50    |
| H(34A) | 4385  | 3915 | 3428 | 36    |

Table S 54. Torsion angles [°] for **NaphO-Cl<sub>6</sub>BsubPc (Toluene:Heptane; CCDC deposit 2087099)**.

---

|                       |             |
|-----------------------|-------------|
| C(24)-N(6)-C(1)-N(1)  | -11.1(3)    |
| C(24)-N(6)-C(1)-C(2)  | 153.8(2)    |
| C(8)-N(1)-C(1)-N(6)   | 157.08(19)  |
| B(1)-N(1)-C(1)-N(6)   | -6.7(3)     |
| C(8)-N(1)-C(1)-C(2)   | -10.9(2)    |
| B(1)-N(1)-C(1)-C(2)   | -174.65(18) |
| N(6)-C(1)-C(2)-C(3)   | 9.7(4)      |
| N(1)-C(1)-C(2)-C(3)   | 176.7(2)    |
| N(6)-C(1)-C(2)-C(7)   | -161.7(2)   |
| N(1)-C(1)-C(2)-C(7)   | 5.4(2)      |
| C(7)-C(2)-C(3)-C(4)   | -1.9(3)     |
| C(1)-C(2)-C(3)-C(4)   | -172.2(2)   |
| C(2)-C(3)-C(4)-C(5)   | 0.0(3)      |
| C(2)-C(3)-C(4)-Cl(1)  | 178.10(16)  |
| C(3)-C(4)-C(5)-C(6)   | 2.5(3)      |
| Cl(1)-C(4)-C(5)-C(6)  | -175.58(17) |
| C(3)-C(4)-C(5)-Cl(2)  | -178.22(17) |
| Cl(1)-C(4)-C(5)-Cl(2) | 3.7(3)      |
| C(4)-C(5)-C(6)-C(7)   | -3.0(3)     |
| Cl(2)-C(5)-C(6)-C(7)  | 177.70(16)  |
| C(5)-C(6)-C(7)-C(2)   | 1.1(3)      |
| C(5)-C(6)-C(7)-C(8)   | 171.3(2)    |
| C(3)-C(2)-C(7)-C(6)   | 1.3(3)      |
| C(1)-C(2)-C(7)-C(6)   | 173.78(19)  |
| C(3)-C(2)-C(7)-C(8)   | -170.99(19) |
| C(1)-C(2)-C(7)-C(8)   | 1.5(2)      |
| C(9)-N(2)-C(8)-N(1)   | 10.0(3)     |
| C(9)-N(2)-C(8)-C(7)   | -149.9(2)   |
| C(1)-N(1)-C(8)-N(2)   | -152.0(2)   |
| B(1)-N(1)-C(8)-N(2)   | 11.8(3)     |
| C(1)-N(1)-C(8)-C(7)   | 11.8(2)     |
| B(1)-N(1)-C(8)-C(7)   | 175.66(18)  |
| C(6)-C(7)-C(8)-N(2)   | -16.2(4)    |

|                         |             |
|-------------------------|-------------|
| C(2)-C(7)-C(8)-N(2)     | 154.9(2)    |
| C(6)-C(7)-C(8)-N(1)     | -178.9(2)   |
| C(2)-C(7)-C(8)-N(1)     | -7.7(2)     |
| C(8)-N(2)-C(9)-N(3)     | -9.9(3)     |
| C(8)-N(2)-C(9)-C(10)    | 149.9(2)    |
| C(16)-N(3)-C(9)-N(2)    | 153.1(2)    |
| B(1)-N(3)-C(9)-N(2)     | -12.1(3)    |
| C(16)-N(3)-C(9)-C(10)   | -10.5(2)    |
| B(1)-N(3)-C(9)-C(10)    | -175.69(18) |
| N(2)-C(9)-C(10)-C(11)   | 17.1(4)     |
| N(3)-C(9)-C(10)-C(11)   | 179.6(2)    |
| N(2)-C(9)-C(10)-C(15)   | -156.7(2)   |
| N(3)-C(9)-C(10)-C(15)   | 5.7(2)      |
| C(15)-C(10)-C(11)-C(12) | -2.9(3)     |
| C(9)-C(10)-C(11)-C(12)  | -176.1(2)   |
| C(10)-C(11)-C(12)-C(13) | 1.3(3)      |
| C(10)-C(11)-C(12)-Cl(3) | -176.47(16) |
| C(11)-C(12)-C(13)-C(14) | 1.4(3)      |
| Cl(3)-C(12)-C(13)-C(14) | 179.11(17)  |
| C(11)-C(12)-C(13)-Cl(4) | -175.46(17) |
| Cl(3)-C(12)-C(13)-Cl(4) | 2.2(3)      |
| C(12)-C(13)-C(14)-C(15) | -2.4(3)     |
| Cl(4)-C(13)-C(14)-C(15) | 174.54(16)  |
| C(13)-C(14)-C(15)-C(10) | 0.7(3)      |
| C(13)-C(14)-C(15)-C(16) | 175.6(2)    |
| C(11)-C(10)-C(15)-C(14) | 2.0(3)      |
| C(9)-C(10)-C(15)-C(14)  | 176.56(19)  |
| C(11)-C(10)-C(15)-C(16) | -174.07(19) |
| C(9)-C(10)-C(15)-C(16)  | 0.5(2)      |
| C(17)-N(4)-C(16)-N(3)   | 9.7(3)      |
| C(17)-N(4)-C(16)-C(15)  | -153.7(2)   |
| C(9)-N(3)-C(16)-N(4)    | -156.10(19) |
| B(1)-N(3)-C(16)-N(4)    | 8.9(3)      |
| C(9)-N(3)-C(16)-C(15)   | 10.8(2)     |
| B(1)-N(3)-C(16)-C(15)   | 175.72(18)  |
| C(14)-C(15)-C(16)-N(4)  | -16.4(4)    |

|                         |             |
|-------------------------|-------------|
| C(10)-C(15)-C(16)-N(4)  | 159.0(2)    |
| C(14)-C(15)-C(16)-N(3)  | 178.1(2)    |
| C(10)-C(15)-C(16)-N(3)  | -6.6(2)     |
| C(16)-N(4)-C(17)-N(5)   | -5.3(3)     |
| C(16)-N(4)-C(17)-C(18)  | 159.1(2)    |
| C(24)-N(5)-C(17)-N(4)   | 154.21(19)  |
| B(1)-N(5)-C(17)-N(4)    | -18.0(3)    |
| C(24)-N(5)-C(17)-C(18)  | -13.7(2)    |
| B(1)-N(5)-C(17)-C(18)   | 174.14(18)  |
| N(4)-C(17)-C(18)-C(19)  | 20.8(4)     |
| N(5)-C(17)-C(18)-C(19)  | -172.9(2)   |
| N(4)-C(17)-C(18)-C(23)  | -158.8(2)   |
| N(5)-C(17)-C(18)-C(23)  | 7.4(2)      |
| C(23)-C(18)-C(19)-C(20) | -1.4(3)     |
| C(17)-C(18)-C(19)-C(20) | 179.0(2)    |
| C(18)-C(19)-C(20)-C(21) | 1.7(3)      |
| C(18)-C(19)-C(20)-Cl(5) | -176.37(16) |
| C(19)-C(20)-C(21)-C(22) | -0.6(3)     |
| Cl(5)-C(20)-C(21)-C(22) | 177.44(17)  |
| C(19)-C(20)-C(21)-Cl(6) | -178.07(16) |
| Cl(5)-C(20)-C(21)-Cl(6) | 0.0(3)      |
| C(20)-C(21)-C(22)-C(23) | -0.8(3)     |
| Cl(6)-C(21)-C(22)-C(23) | 176.70(16)  |
| C(21)-C(22)-C(23)-C(18) | 1.1(3)      |
| C(21)-C(22)-C(23)-C(24) | -180.0(2)   |
| C(19)-C(18)-C(23)-C(22) | 0.0(3)      |
| C(17)-C(18)-C(23)-C(22) | 179.68(19)  |
| C(19)-C(18)-C(23)-C(24) | -179.15(19) |
| C(17)-C(18)-C(23)-C(24) | 0.5(2)      |
| C(1)-N(6)-C(24)-N(5)    | 4.9(3)      |
| C(1)-N(6)-C(24)-C(23)   | -158.6(2)   |
| C(17)-N(5)-C(24)-N(6)   | -153.01(19) |
| B(1)-N(5)-C(24)-N(6)    | 19.3(3)     |
| C(17)-N(5)-C(24)-C(23)  | 14.0(2)     |
| B(1)-N(5)-C(24)-C(23)   | -173.66(18) |
| C(22)-C(23)-C(24)-N(6)  | -21.8(4)    |

|                         |             |
|-------------------------|-------------|
| C(18)-C(23)-C(24)-N(6)  | 157.2(2)    |
| C(22)-C(23)-C(24)-N(5)  | 172.6(2)    |
| C(18)-C(23)-C(24)-N(5)  | -8.4(2)     |
| B(1)-O(1)-C(25)-C(34)   | -85.4(3)    |
| B(1)-O(1)-C(25)-C(26)   | 98.0(2)     |
| C(34)-C(25)-C(26)-C(27) | 0.7(4)      |
| O(1)-C(25)-C(26)-C(27)  | 177.2(2)    |
| C(25)-C(26)-C(27)-C(28) | 0.0(4)      |
| C(26)-C(27)-C(28)-C(33) | -0.5(4)     |
| C(26)-C(27)-C(28)-C(29) | 179.4(2)    |
| C(27)-C(28)-C(29)-C(30) | -179.6(2)   |
| C(33)-C(28)-C(29)-C(30) | 0.2(3)      |
| C(28)-C(29)-C(30)-C(31) | -0.8(4)     |
| C(29)-C(30)-C(31)-C(32) | 0.6(4)      |
| C(30)-C(31)-C(32)-C(33) | 0.2(4)      |
| C(31)-C(32)-C(33)-C(28) | -0.8(4)     |
| C(31)-C(32)-C(33)-C(34) | 179.3(2)    |
| C(27)-C(28)-C(33)-C(32) | -179.6(2)   |
| C(29)-C(28)-C(33)-C(32) | 0.6(3)      |
| C(27)-C(28)-C(33)-C(34) | 0.3(3)      |
| C(29)-C(28)-C(33)-C(34) | -179.6(2)   |
| O(1)-C(25)-C(34)-C(33)  | -177.25(19) |
| C(26)-C(25)-C(34)-C(33) | -0.8(3)     |
| C(32)-C(33)-C(34)-C(25) | -179.8(2)   |
| C(28)-C(33)-C(34)-C(25) | 0.4(3)      |
| C(25)-O(1)-B(1)-N(5)    | 69.6(3)     |
| C(25)-O(1)-B(1)-N(3)    | -52.3(3)    |
| C(25)-O(1)-B(1)-N(1)    | -171.98(19) |
| C(24)-N(5)-B(1)-O(1)    | 90.7(2)     |
| C(17)-N(5)-B(1)-O(1)    | -97.8(2)    |
| C(24)-N(5)-B(1)-N(3)    | -140.56(19) |
| C(17)-N(5)-B(1)-N(3)    | 30.9(3)     |
| C(24)-N(5)-B(1)-N(1)    | -31.7(3)    |
| C(17)-N(5)-B(1)-N(1)    | 139.77(19)  |
| C(9)-N(3)-B(1)-O(1)     | -94.4(2)    |
| C(16)-N(3)-B(1)-O(1)    | 102.0(2)    |

|                      |             |
|----------------------|-------------|
| C(9)-N(3)-B(1)-N(5)  | 137.18(18)  |
| C(16)-N(3)-B(1)-N(5) | -26.4(3)    |
| C(9)-N(3)-B(1)-N(1)  | 28.8(3)     |
| C(16)-N(3)-B(1)-N(1) | -134.74(19) |
| C(1)-N(1)-B(1)-O(1)  | -99.9(2)    |
| C(8)-N(1)-B(1)-O(1)  | 97.8(2)     |
| C(1)-N(1)-B(1)-N(5)  | 25.6(3)     |
| C(8)-N(1)-B(1)-N(5)  | -136.65(19) |
| C(1)-N(1)-B(1)-N(3)  | 133.47(19)  |
| C(8)-N(1)-B(1)-N(3)  | -28.8(3)    |

---

Symmetry transformations used to generate equivalent atoms:

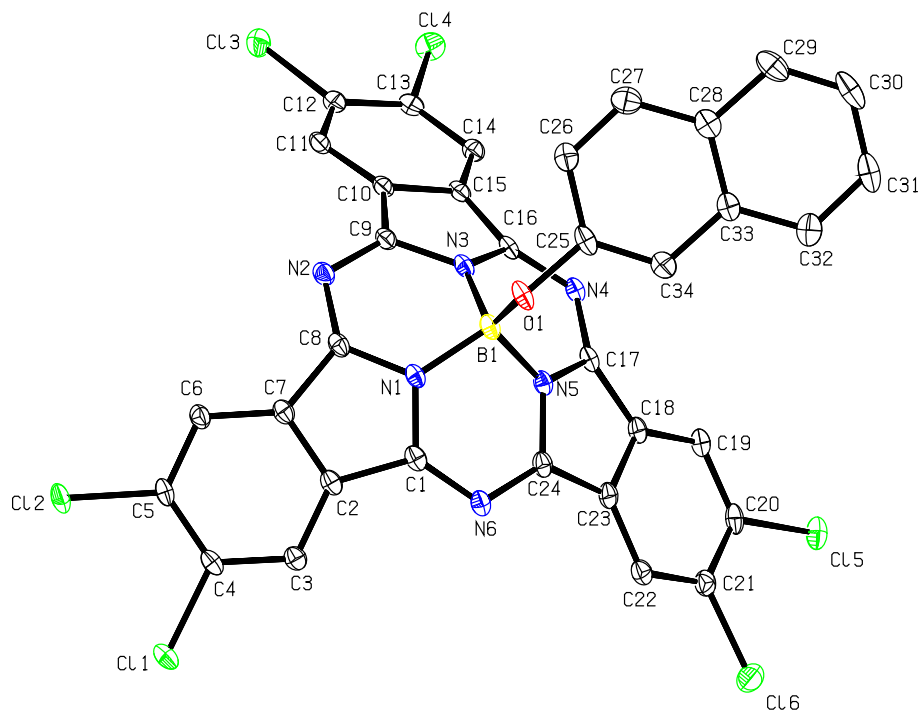

Figure S28: Anisotropic displacement ellipsoid plot of NaphO-Cl<sub>6</sub> BsubPc (Chlorobenzene:Heptane; CCDC deposit 2087101).



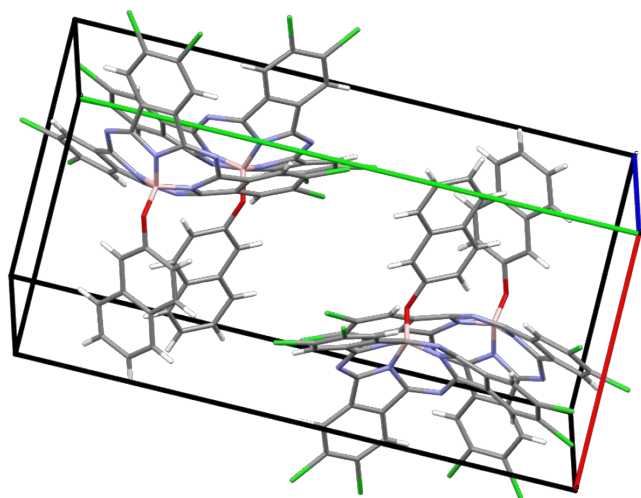

Figure S29: Populated unit cell of NaphO-Cl<sub>6</sub>BsubPc (Chlorobenzene:Heptane; CCDC deposit 2087101).

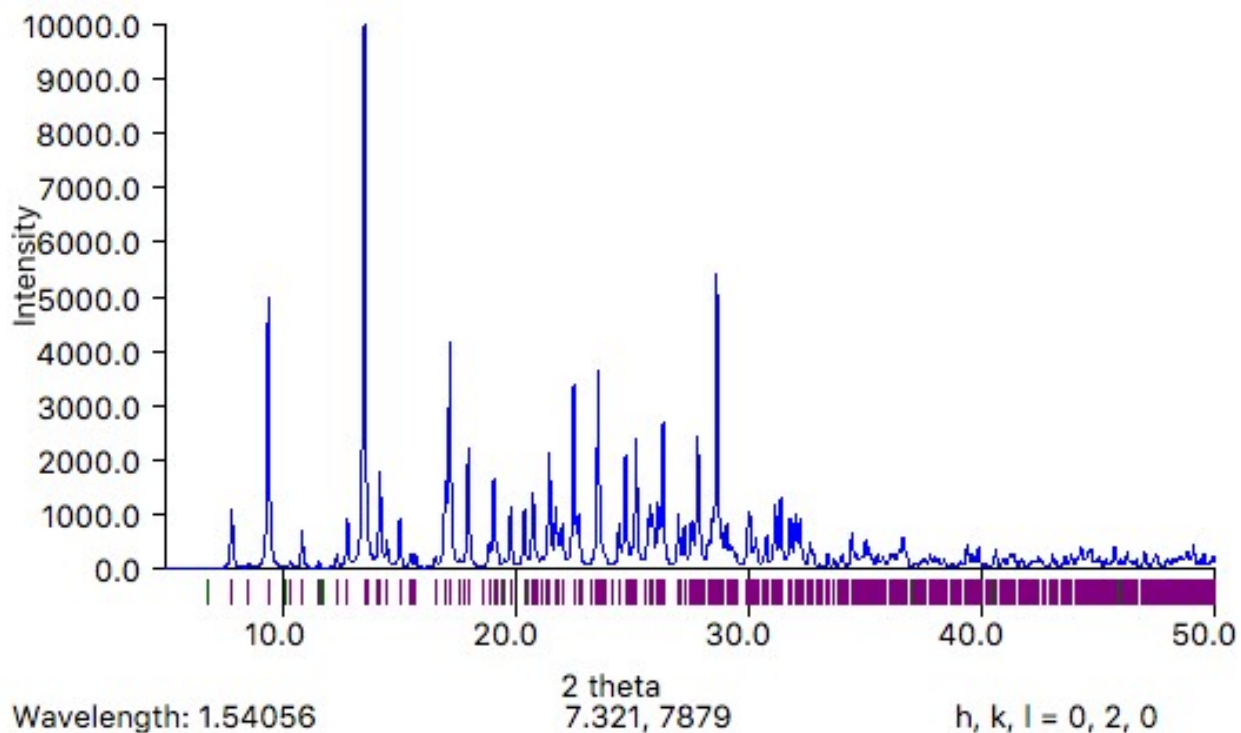

Figure S 30: Powder x-ray diffraction **NaphO-Cl<sub>6</sub>BsubPc** (Chlorobenzene:Heptane; CCDC deposit 2087101).

Table S 55. Crystal data and structure refinement for NaphO-Cl<sub>6</sub>BsubPc (Chlorobenzene:Heptane; CCDC deposit 2087101).

|                                   |                                                                    |                 |
|-----------------------------------|--------------------------------------------------------------------|-----------------|
| Identification code               | d19210_a                                                           |                 |
| Empirical formula                 | C <sub>34</sub> H <sub>13</sub> B Cl <sub>6</sub> N <sub>6</sub> O |                 |
| Formula weight                    | 745.01                                                             |                 |
| Temperature                       | 150(2) K                                                           |                 |
| Wavelength                        | 0.71073 Å                                                          |                 |
| Crystal system                    | Monoclinic                                                         |                 |
| Space group                       | P2 <sub>1</sub> /c                                                 |                 |
| Unit cell dimensions              | a = 10.4146(7) Å                                                   | α = 90°.        |
|                                   | b = 22.7238(13) Å                                                  | β = 98.340(2)°. |
|                                   | c = 13.0926(9) Å                                                   | γ = 90°.        |
| Volume                            | 3065.7(3) Å <sup>3</sup>                                           |                 |
| Z                                 | 4                                                                  |                 |
| Density (calculated)              | 1.614 Mg/m <sup>3</sup>                                            |                 |
| Absorption coefficient            | 0.603 mm <sup>-1</sup>                                             |                 |
| F(000)                            | 1496                                                               |                 |
| Crystal size                      | 0.260 x 0.150 x 0.130 mm <sup>3</sup>                              |                 |
| Theta range for data collection   | 1.792 to 27.579°.                                                  |                 |
| Index ranges                      | -13 ≤ h ≤ 13, -25 ≤ k ≤ 29, -17 ≤ l ≤ 16                           |                 |
| Reflections collected             | 51899                                                              |                 |
| Independent reflections           | 7075 [R(int) = 0.0875]                                             |                 |
| Completeness to theta = 25.242°   | 100.0 %                                                            |                 |
| Absorption correction             | Semi-empirical from equivalents                                    |                 |
| Max. and min. transmission        | 0.7456 and 0.6837                                                  |                 |
| Refinement method                 | Full-matrix least-squares on F <sup>2</sup>                        |                 |
| Data / restraints / parameters    | 7075 / 0 / 433                                                     |                 |
| Goodness-of-fit on F <sup>2</sup> | 1.026                                                              |                 |
| Final R indices [I > 2σ(I)]       | R1 = 0.0431, wR2 = 0.0819                                          |                 |
| R indices (all data)              | R1 = 0.1010, wR2 = 0.1028                                          |                 |
| Extinction coefficient            | n/a                                                                |                 |
| Largest diff. peak and hole       | 0.434 and -0.442 e.Å <sup>-3</sup>                                 |                 |

Table S 56. Atomic coordinates ( $\times 10^4$ ) and equivalent isotropic displacement parameters ( $\text{\AA}^2 \times 10^3$ ) for **NaphO-Cl<sub>6</sub>BsubPc (Chlorobenzene:Heptane; CCDC deposit 2087101)**. U(eq) is defined as one third of the trace of the orthogonalized  $U^{ij}$  tensor.

|       | x        | y       | z        | U(eq) |
|-------|----------|---------|----------|-------|
| Cl(1) | 13889(1) | 4561(1) | 6108(1)  | 34(1) |
| Cl(2) | 14028(1) | 3317(1) | 7174(1)  | 38(1) |
| Cl(3) | 9334(1)  | 117(1)  | 3450(1)  | 40(1) |
| Cl(4) | 7506(1)  | 337(1)  | 1355(1)  | 35(1) |
| Cl(5) | 5753(1)  | 4634(1) | -1286(1) | 33(1) |
| Cl(6) | 7251(1)  | 5665(1) | 2(1)     | 39(1) |
| O(1)  | 6140(2)  | 3408(1) | 4705(1)  | 28(1) |
| N(1)  | 8468(2)  | 3450(1) | 4726(2)  | 22(1) |
| N(2)  | 9074(2)  | 2458(1) | 5141(2)  | 26(1) |
| N(3)  | 7337(2)  | 2671(1) | 3790(2)  | 22(1) |
| N(4)  | 6499(2)  | 2836(1) | 2016(2)  | 22(1) |
| N(5)  | 7149(2)  | 3634(1) | 3140(2)  | 22(1) |
| N(6)  | 8689(2)  | 4348(1) | 3836(2)  | 24(1) |
| C(1)  | 9097(3)  | 3962(1) | 4588(2)  | 23(1) |
| C(2)  | 10353(3) | 3919(1) | 5241(2)  | 23(1) |
| C(3)  | 11411(3) | 4297(1) | 5378(2)  | 24(1) |
| C(4)  | 12540(3) | 4105(1) | 5963(2)  | 25(1) |
| C(5)  | 12623(3) | 3543(1) | 6413(2)  | 25(1) |
| C(6)  | 11591(3) | 3157(1) | 6251(2)  | 25(1) |
| C(7)  | 10449(3) | 3346(1) | 5668(2)  | 23(1) |
| C(8)  | 9263(3)  | 3039(1) | 5259(2)  | 23(1) |
| C(9)  | 8171(3)  | 2287(1) | 4355(2)  | 23(1) |
| C(10) | 8130(2)  | 1751(1) | 3760(2)  | 23(1) |
| C(11) | 8783(3)  | 1219(1) | 3951(2)  | 26(1) |
| C(12) | 8605(3)  | 794(1)  | 3200(2)  | 27(1) |
| C(13) | 7804(3)  | 898(1)  | 2251(2)  | 25(1) |
| C(14) | 7198(3)  | 1431(1) | 2036(2)  | 23(1) |
| C(15) | 7351(2)  | 1863(1) | 2797(2)  | 23(1) |
| C(16) | 6926(2)  | 2472(1) | 2806(2)  | 22(1) |
| C(17) | 6662(2)  | 3415(1) | 2188(2)  | 22(1) |

|       |         |         |         |       |
|-------|---------|---------|---------|-------|
| C(18) | 6696(2) | 3909(1) | 1474(2) | 24(1) |
| C(19) | 6232(3) | 3986(1) | 435(2)  | 25(1) |
| C(20) | 6411(3) | 4525(1) | -12(2)  | 27(1) |
| C(21) | 7072(3) | 4983(1) | 562(2)  | 28(1) |
| C(22) | 7563(3) | 4912(1) | 1590(2) | 26(1) |
| C(23) | 7364(2) | 4376(1) | 2050(2) | 24(1) |
| C(24) | 7746(3) | 4162(1) | 3092(2) | 24(1) |
| C(25) | 4889(3) | 3228(1) | 4334(2) | 27(1) |
| C(26) | 4452(3) | 2691(1) | 4717(2) | 32(1) |
| C(27) | 3211(3) | 2505(1) | 4415(3) | 38(1) |
| C(28) | 2359(3) | 2839(1) | 3713(2) | 31(1) |
| C(29) | 1047(3) | 2656(2) | 3367(3) | 42(1) |
| C(30) | 251(3)  | 2987(2) | 2696(3) | 44(1) |
| C(31) | 682(3)  | 3518(2) | 2328(3) | 45(1) |
| C(32) | 1923(3) | 3710(2) | 2641(3) | 42(1) |
| C(33) | 2772(3) | 3378(1) | 3329(2) | 28(1) |
| C(34) | 4092(3) | 3564(1) | 3671(2) | 31(1) |
| B(1)  | 7177(3) | 3294(1) | 4118(2) | 24(1) |

---

Table S 57. Bond lengths [Å] and angles [°] for **NaphO-Cl<sub>6</sub>BsubPc (Chlorobenzene:Heptane; CCDC deposit 2087101)**.

---

|             |          |
|-------------|----------|
| Cl(1)-C(4)  | 1.733(3) |
| Cl(2)-C(5)  | 1.725(3) |
| Cl(3)-C(12) | 1.727(3) |
| Cl(4)-C(13) | 1.730(3) |
| Cl(5)-C(20) | 1.728(3) |
| Cl(6)-C(21) | 1.736(3) |
| O(1)-C(25)  | 1.385(3) |
| O(1)-B(1)   | 1.437(4) |
| N(1)-C(1)   | 1.360(3) |
| N(1)-C(8)   | 1.371(3) |
| N(1)-B(1)   | 1.502(4) |
| N(2)-C(8)   | 1.341(3) |
| N(2)-C(9)   | 1.347(3) |
| N(3)-C(9)   | 1.370(3) |
| N(3)-C(16)  | 1.374(3) |
| N(3)-B(1)   | 1.497(4) |
| N(4)-C(17)  | 1.341(3) |
| N(4)-C(16)  | 1.349(3) |
| N(5)-C(24)  | 1.358(3) |
| N(5)-C(17)  | 1.370(3) |
| N(5)-B(1)   | 1.491(4) |
| N(6)-C(1)   | 1.341(3) |
| N(6)-C(24)  | 1.346(3) |
| C(1)-C(2)   | 1.459(4) |
| C(2)-C(3)   | 1.387(4) |
| C(2)-C(7)   | 1.414(4) |
| C(3)-C(4)   | 1.378(4) |
| C(3)-H(3A)  | 0.9500   |
| C(4)-C(5)   | 1.404(4) |
| C(5)-C(6)   | 1.380(4) |
| C(6)-C(7)   | 1.386(4) |
| C(6)-H(6A)  | 0.9500   |

|              |          |
|--------------|----------|
| C(7)-C(8)    | 1.452(4) |
| C(9)-C(10)   | 1.443(4) |
| C(10)-C(11)  | 1.392(4) |
| C(10)-C(15)  | 1.421(4) |
| C(11)-C(12)  | 1.370(4) |
| C(11)-H(11A) | 0.9500   |
| C(12)-C(13)  | 1.412(4) |
| C(13)-C(14)  | 1.376(4) |
| C(14)-C(15)  | 1.391(4) |
| C(14)-H(14A) | 0.9500   |
| C(15)-C(16)  | 1.453(4) |
| C(17)-C(18)  | 1.465(4) |
| C(18)-C(19)  | 1.388(4) |
| C(18)-C(23)  | 1.423(4) |
| C(19)-C(20)  | 1.380(4) |
| C(19)-H(19A) | 0.9500   |
| C(20)-C(21)  | 1.404(4) |
| C(21)-C(22)  | 1.379(4) |
| C(22)-C(23)  | 1.389(4) |
| C(22)-H(22A) | 0.9500   |
| C(23)-C(24)  | 1.448(4) |
| C(25)-C(34)  | 1.348(4) |
| C(25)-C(26)  | 1.418(4) |
| C(26)-C(27)  | 1.362(4) |
| C(26)-H(26A) | 0.9500   |
| C(27)-C(28)  | 1.403(4) |
| C(27)-H(27A) | 0.9500   |
| C(28)-C(33)  | 1.415(4) |
| C(28)-C(29)  | 1.438(4) |
| C(29)-C(30)  | 1.346(5) |
| C(29)-H(29A) | 0.9500   |
| C(30)-C(31)  | 1.399(5) |
| C(30)-H(30A) | 0.9500   |
| C(31)-C(32)  | 1.369(4) |
| C(31)-H(31A) | 0.9500   |
| C(32)-C(33)  | 1.391(4) |

|                  |          |
|------------------|----------|
| C(32)-H(32A)     | 0.9500   |
| C(33)-C(34)      | 1.445(4) |
| C(34)-H(34A)     | 0.9500   |
| C(25)-O(1)-B(1)  | 120.1(2) |
| C(1)-N(1)-C(8)   | 112.6(2) |
| C(1)-N(1)-B(1)   | 122.9(2) |
| C(8)-N(1)-B(1)   | 122.5(2) |
| C(8)-N(2)-C(9)   | 116.5(2) |
| C(9)-N(3)-C(16)  | 112.6(2) |
| C(9)-N(3)-B(1)   | 122.4(2) |
| C(16)-N(3)-B(1)  | 123.3(2) |
| C(17)-N(4)-C(16) | 117.0(2) |
| C(24)-N(5)-C(17) | 112.9(2) |
| C(24)-N(5)-B(1)  | 123.0(2) |
| C(17)-N(5)-B(1)  | 123.6(2) |
| C(1)-N(6)-C(24)  | 116.5(2) |
| N(6)-C(1)-N(1)   | 123.4(2) |
| N(6)-C(1)-C(2)   | 129.5(3) |
| N(1)-C(1)-C(2)   | 105.9(2) |
| C(3)-C(2)-C(7)   | 120.6(2) |
| C(3)-C(2)-C(1)   | 131.5(3) |
| C(7)-C(2)-C(1)   | 107.4(2) |
| C(4)-C(3)-C(2)   | 118.3(3) |
| C(4)-C(3)-H(3A)  | 120.8    |
| C(2)-C(3)-H(3A)  | 120.8    |
| C(3)-C(4)-C(5)   | 121.1(3) |
| C(3)-C(4)-Cl(1)  | 119.0(2) |
| C(5)-C(4)-Cl(1)  | 119.9(2) |
| C(6)-C(5)-C(4)   | 121.0(2) |
| C(6)-C(5)-Cl(2)  | 118.4(2) |
| C(4)-C(5)-Cl(2)  | 120.5(2) |
| C(5)-C(6)-C(7)   | 118.3(3) |
| C(5)-C(6)-H(6A)  | 120.9    |
| C(7)-C(6)-H(6A)  | 120.9    |
| C(6)-C(7)-C(2)   | 120.7(2) |



|                    |          |
|--------------------|----------|
| C(6)-C(7)-C(8)     | 132.0(3) |
| C(2)-C(7)-C(8)     | 106.9(2) |
| N(2)-C(8)-N(1)     | 123.0(2) |
| N(2)-C(8)-C(7)     | 128.3(2) |
| N(1)-C(8)-C(7)     | 106.2(2) |
| N(2)-C(9)-N(3)     | 123.1(2) |
| N(2)-C(9)-C(10)    | 128.2(2) |
| N(3)-C(9)-C(10)    | 106.3(2) |
| C(11)-C(10)-C(15)  | 121.1(3) |
| C(11)-C(10)-C(9)   | 131.4(3) |
| C(15)-C(10)-C(9)   | 107.2(2) |
| C(12)-C(11)-C(10)  | 118.1(3) |
| C(12)-C(11)-H(11A) | 121.0    |
| C(10)-C(11)-H(11A) | 121.0    |
| C(11)-C(12)-C(13)  | 121.1(3) |
| C(11)-C(12)-Cl(3)  | 118.7(2) |
| C(13)-C(12)-Cl(3)  | 120.2(2) |
| C(14)-C(13)-C(12)  | 121.4(3) |
| C(14)-C(13)-Cl(4)  | 118.6(2) |
| C(12)-C(13)-Cl(4)  | 119.9(2) |
| C(13)-C(14)-C(15)  | 118.3(3) |
| C(13)-C(14)-H(14A) | 120.8    |
| C(15)-C(14)-H(14A) | 120.8    |
| C(14)-C(15)-C(10)  | 120.0(3) |
| C(14)-C(15)-C(16)  | 132.4(3) |
| C(10)-C(15)-C(16)  | 107.4(2) |
| N(4)-C(16)-N(3)    | 122.7(2) |
| N(4)-C(16)-C(15)   | 130.2(2) |
| N(3)-C(16)-C(15)   | 105.5(2) |
| N(4)-C(17)-N(5)    | 122.0(2) |
| N(4)-C(17)-C(18)   | 131.3(3) |
| N(5)-C(17)-C(18)   | 105.2(2) |
| C(19)-C(18)-C(23)  | 120.0(3) |
| C(19)-C(18)-C(17)  | 133.3(3) |
| C(23)-C(18)-C(17)  | 106.8(2) |
| C(20)-C(19)-C(18)  | 118.5(3) |

|                    |          |
|--------------------|----------|
| C(20)-C(19)-H(19A) | 120.7    |
| C(18)-C(19)-H(19A) | 120.7    |
| C(19)-C(20)-C(21)  | 121.1(3) |
| C(19)-C(20)-Cl(5)  | 118.5(2) |
| C(21)-C(20)-Cl(5)  | 120.3(2) |
| C(22)-C(21)-C(20)  | 121.3(3) |
| C(22)-C(21)-Cl(6)  | 118.0(2) |
| C(20)-C(21)-Cl(6)  | 120.7(2) |
| C(21)-C(22)-C(23)  | 117.9(3) |
| C(21)-C(22)-H(22A) | 121.0    |
| C(23)-C(22)-H(22A) | 121.0    |
| C(22)-C(23)-C(18)  | 121.1(3) |
| C(22)-C(23)-C(24)  | 131.7(3) |
| C(18)-C(23)-C(24)  | 107.2(2) |
| N(6)-C(24)-N(5)    | 122.3(2) |
| N(6)-C(24)-C(23)   | 130.4(3) |
| N(5)-C(24)-C(23)   | 106.0(2) |
| C(34)-C(25)-O(1)   | 121.2(3) |
| C(34)-C(25)-C(26)  | 121.0(3) |
| O(1)-C(25)-C(26)   | 117.7(3) |
| C(27)-C(26)-C(25)  | 120.2(3) |
| C(27)-C(26)-H(26A) | 119.9    |
| C(25)-C(26)-H(26A) | 119.9    |
| C(26)-C(27)-C(28)  | 120.4(3) |
| C(26)-C(27)-H(27A) | 119.8    |
| C(28)-C(27)-H(27A) | 119.8    |
| C(27)-C(28)-C(33)  | 120.3(3) |
| C(27)-C(28)-C(29)  | 122.2(3) |
| C(33)-C(28)-C(29)  | 117.5(3) |
| C(30)-C(29)-C(28)  | 120.8(3) |
| C(30)-C(29)-H(29A) | 119.6    |
| C(28)-C(29)-H(29A) | 119.6    |
| C(29)-C(30)-C(31)  | 120.6(3) |
| C(29)-C(30)-H(30A) | 119.7    |
| C(31)-C(30)-H(30A) | 119.7    |
| C(32)-C(31)-C(30)  | 120.5(3) |

|                    |          |
|--------------------|----------|
| C(32)-C(31)-H(31A) | 119.7    |
| C(30)-C(31)-H(31A) | 119.7    |
| C(31)-C(32)-C(33)  | 120.3(3) |
| C(31)-C(32)-H(32A) | 119.8    |
| C(33)-C(32)-H(32A) | 119.8    |
| C(32)-C(33)-C(28)  | 120.2(3) |
| C(32)-C(33)-C(34)  | 122.0(3) |
| C(28)-C(33)-C(34)  | 117.8(3) |
| C(25)-C(34)-C(33)  | 120.2(3) |
| C(25)-C(34)-H(34A) | 119.9    |
| C(33)-C(34)-H(34A) | 119.9    |
| O(1)-B(1)-N(5)     | 116.3(2) |
| O(1)-B(1)-N(3)     | 116.6(2) |
| N(5)-B(1)-N(3)     | 103.4(2) |
| O(1)-B(1)-N(1)     | 111.1(2) |
| N(5)-B(1)-N(1)     | 103.7(2) |
| N(3)-B(1)-N(1)     | 104.3(2) |

---

Symmetry transformations used to generate equivalent atoms:

Table S 58. Anisotropic displacement parameters ( $\text{\AA}^2 \times 10^3$ ) for **NaphO-Cl<sub>6</sub>BsubPc (Chlorobenzene:Heptane; CCDC deposit 2087101)**. The anisotropic displacement factor exponent takes the form:  $-2\pi^2 [h^2 a^{*2} U^{11} + \dots + 2 h k a^* b^* U^{12}]$ .

|       | U <sup>11</sup> | U <sup>22</sup> | U <sup>33</sup> | U <sup>23</sup> | U <sup>13</sup> | U <sup>12</sup> |
|-------|-----------------|-----------------|-----------------|-----------------|-----------------|-----------------|
| Cl(1) | 22(1)           | 39(1)           | 39(1)           | -4(1)           | -4(1)           | -9(1)           |
| Cl(2) | 22(1)           | 50(1)           | 38(1)           | 6(1)            | -11(1)          | -2(1)           |
| Cl(3) | 30(1)           | 32(1)           | 55(1)           | 3(1)            | -3(1)           | 4(1)            |
| Cl(4) | 42(1)           | 32(1)           | 32(1)           | -6(1)           | 8(1)            | 1(1)            |
| Cl(5) | 29(1)           | 48(1)           | 23(1)           | 3(1)            | 1(1)            | 11(1)           |
| Cl(6) | 41(1)           | 36(1)           | 40(1)           | 9(1)            | 6(1)            | 5(1)            |
| O(1)  | 15(1)           | 44(1)           | 22(1)           | -9(1)           | -1(1)           | -1(1)           |
| N(1)  | 17(1)           | 29(1)           | 18(1)           | -3(1)           | 0(1)            | -2(1)           |
| N(2)  | 22(1)           | 32(1)           | 21(1)           | 2(1)            | -1(1)           | -5(1)           |
| N(3)  | 16(1)           | 31(1)           | 18(1)           | -2(1)           | -1(1)           | -4(1)           |
| N(4)  | 16(1)           | 29(1)           | 21(1)           | -4(1)           | -1(1)           | 1(1)            |
| N(5)  | 18(1)           | 26(1)           | 19(1)           | -5(1)           | -2(1)           | 1(1)            |
| N(6)  | 20(1)           | 27(1)           | 24(1)           | -5(1)           | -1(1)           | 3(1)            |
| C(1)  | 21(1)           | 28(2)           | 21(2)           | -10(1)          | 2(1)            | 1(1)            |
| C(2)  | 21(1)           | 29(2)           | 18(2)           | -8(1)           | 1(1)            | -1(1)           |
| C(3)  | 25(2)           | 26(2)           | 21(2)           | -5(1)           | 1(1)            | -2(1)           |
| C(4)  | 18(1)           | 33(2)           | 24(2)           | -8(1)           | 1(1)            | -4(1)           |
| C(5)  | 18(1)           | 36(2)           | 20(2)           | -4(1)           | -4(1)           | 2(1)            |
| C(6)  | 21(1)           | 33(2)           | 21(2)           | 2(1)            | -2(1)           | -3(1)           |
| C(7)  | 21(1)           | 29(2)           | 18(2)           | -4(1)           | 1(1)            | -2(1)           |
| C(8)  | 19(1)           | 34(2)           | 17(2)           | -2(1)           | 1(1)            | -3(1)           |
| C(9)  | 18(1)           | 30(2)           | 21(2)           | 2(1)            | 2(1)            | -4(1)           |
| C(10) | 17(1)           | 28(2)           | 23(2)           | 2(1)            | 1(1)            | -5(1)           |
| C(11) | 18(1)           | 33(2)           | 26(2)           | 4(1)            | -1(1)           | -7(1)           |
| C(12) | 20(2)           | 26(2)           | 34(2)           | 3(1)            | 4(1)            | -2(1)           |
| C(13) | 22(1)           | 28(2)           | 26(2)           | -3(1)           | 7(1)            | -5(1)           |
| C(14) | 22(1)           | 30(2)           | 18(2)           | 1(1)            | 2(1)            | -4(1)           |
| C(15) | 16(1)           | 29(2)           | 22(2)           | 0(1)            | 3(1)            | -6(1)           |
| C(16) | 13(1)           | 30(2)           | 21(2)           | -5(1)           | -1(1)           | -3(1)           |
| C(17) | 15(1)           | 31(2)           | 21(2)           | -6(1)           | -1(1)           | 1(1)            |

|       |       |       |       |        |       |        |
|-------|-------|-------|-------|--------|-------|--------|
| C(18) | 17(1) | 29(2) | 25(2) | -4(1)  | 1(1)  | 6(1)   |
| C(19) | 20(1) | 33(2) | 22(2) | -4(1)  | -1(1) | 6(1)   |
| C(20) | 16(1) | 41(2) | 24(2) | -2(1)  | 3(1)  | 11(1)  |
| C(21) | 20(1) | 31(2) | 32(2) | 2(1)   | 4(1)  | 5(1)   |
| C(22) | 19(1) | 28(2) | 30(2) | -4(1)  | 1(1)  | 2(1)   |
| C(23) | 17(1) | 27(2) | 26(2) | -3(1)  | 2(1)  | 7(1)   |
| C(24) | 19(1) | 26(2) | 25(2) | -5(1)  | 1(1)  | 6(1)   |
| C(25) | 18(1) | 42(2) | 21(2) | -12(1) | 2(1)  | 2(1)   |
| C(26) | 28(2) | 38(2) | 30(2) | 0(1)   | 3(1)  | 3(1)   |
| C(27) | 39(2) | 39(2) | 37(2) | -2(2)  | 10(2) | -4(2)  |
| C(28) | 29(2) | 39(2) | 26(2) | -9(1)  | 6(1)  | 1(1)   |
| C(29) | 30(2) | 59(2) | 38(2) | -14(2) | 12(2) | -11(2) |
| C(30) | 18(2) | 74(3) | 39(2) | -26(2) | 3(1)  | -3(2)  |
| C(31) | 27(2) | 67(3) | 36(2) | -11(2) | -7(2) | 12(2)  |
| C(32) | 37(2) | 45(2) | 42(2) | 2(2)   | 1(2)  | 9(2)   |
| C(33) | 25(2) | 35(2) | 25(2) | -6(1)  | 2(1)  | 4(1)   |
| C(34) | 28(2) | 36(2) | 30(2) | -2(1)  | 4(1)  | -2(1)  |
| B(1)  | 19(2) | 31(2) | 20(2) | -4(1)  | -1(1) | 0(1)   |

---

Table S 59. Hydrogen coordinates ( $\times 10^4$ ) and isotropic displacement parameters ( $\text{\AA}^2 \times 10^{-3}$ ) for **NaphO-Cl<sub>6</sub>BsubPc** (Chlorobenzene:Heptane; CCDC deposit 2087101).

|        | x     | y    | z    | U(eq) |
|--------|-------|------|------|-------|
| H(3A)  | 11358 | 4678 | 5076 | 29    |
| H(6A)  | 11661 | 2771 | 6533 | 31    |
| H(11A) | 9336  | 1152 | 4584 | 31    |
| H(14A) | 6689  | 1502 | 1386 | 28    |
| H(19A) | 5801  | 3675 | 39   | 30    |
| H(22A) | 8024  | 5221 | 1973 | 31    |
| H(26A) | 5026  | 2461 | 5186 | 39    |
| H(27A) | 2921  | 2148 | 4680 | 46    |
| H(29A) | 738   | 2297 | 3614 | 50    |
| H(30A) | -611  | 2858 | 2470 | 53    |
| H(31A) | 109   | 3748 | 1857 | 54    |
| H(32A) | 2205  | 4072 | 2386 | 50    |
| H(34A) | 4398  | 3924 | 3428 | 37    |

Table S 60. Torsion angles [°] for **NaphO-Cl<sub>6</sub>BsubPc (Chlorobenzene:Heptane; CCDC deposit 2087101)**.

---

|                       |           |
|-----------------------|-----------|
| C(24)-N(6)-C(1)-N(1)  | -11.8(4)  |
| C(24)-N(6)-C(1)-C(2)  | 153.4(3)  |
| C(8)-N(1)-C(1)-N(6)   | 157.5(3)  |
| B(1)-N(1)-C(1)-N(6)   | -6.5(4)   |
| C(8)-N(1)-C(1)-C(2)   | -10.6(3)  |
| B(1)-N(1)-C(1)-C(2)   | -174.6(2) |
| N(6)-C(1)-C(2)-C(3)   | 9.8(5)    |
| N(1)-C(1)-C(2)-C(3)   | 176.9(3)  |
| N(6)-C(1)-C(2)-C(7)   | -161.6(3) |
| N(1)-C(1)-C(2)-C(7)   | 5.5(3)    |
| C(7)-C(2)-C(3)-C(4)   | -1.8(4)   |
| C(1)-C(2)-C(3)-C(4)   | -172.2(3) |
| C(2)-C(3)-C(4)-C(5)   | -0.2(4)   |
| C(2)-C(3)-C(4)-Cl(1)  | 177.9(2)  |
| C(3)-C(4)-C(5)-C(6)   | 2.4(4)    |
| Cl(1)-C(4)-C(5)-C(6)  | -175.6(2) |
| C(3)-C(4)-C(5)-Cl(2)  | -178.1(2) |
| Cl(1)-C(4)-C(5)-Cl(2) | 3.8(3)    |
| C(4)-C(5)-C(6)-C(7)   | -2.6(4)   |
| Cl(2)-C(5)-C(6)-C(7)  | 177.9(2)  |
| C(5)-C(6)-C(7)-C(2)   | 0.6(4)    |
| C(5)-C(6)-C(7)-C(8)   | 171.7(3)  |
| C(3)-C(2)-C(7)-C(6)   | 1.6(4)    |
| C(1)-C(2)-C(7)-C(6)   | 174.1(3)  |
| C(3)-C(2)-C(7)-C(8)   | -171.5(2) |
| C(1)-C(2)-C(7)-C(8)   | 1.0(3)    |
| C(9)-N(2)-C(8)-N(1)   | 9.8(4)    |
| C(9)-N(2)-C(8)-C(7)   | -149.6(3) |
| C(1)-N(1)-C(8)-N(2)   | -152.0(3) |
| B(1)-N(1)-C(8)-N(2)   | 12.1(4)   |
| C(1)-N(1)-C(8)-C(7)   | 11.2(3)   |
| B(1)-N(1)-C(8)-C(7)   | 175.4(2)  |
| C(6)-C(7)-C(8)-N(2)   | -17.0(5)  |

|                         |           |
|-------------------------|-----------|
| C(2)-C(7)-C(8)-N(2)     | 155.0(3)  |
| C(6)-C(7)-C(8)-N(1)     | -179.1(3) |
| C(2)-C(7)-C(8)-N(1)     | -7.1(3)   |
| C(8)-N(2)-C(9)-N(3)     | -9.8(4)   |
| C(8)-N(2)-C(9)-C(10)    | 150.1(3)  |
| C(16)-N(3)-C(9)-N(2)    | 153.2(3)  |
| B(1)-N(3)-C(9)-N(2)     | -12.1(4)  |
| C(16)-N(3)-C(9)-C(10)   | -10.5(3)  |
| B(1)-N(3)-C(9)-C(10)    | -175.8(2) |
| N(2)-C(9)-C(10)-C(11)   | 16.8(5)   |
| N(3)-C(9)-C(10)-C(11)   | 179.4(3)  |
| N(2)-C(9)-C(10)-C(15)   | -156.8(3) |
| N(3)-C(9)-C(10)-C(15)   | 5.8(3)    |
| C(15)-C(10)-C(11)-C(12) | -3.0(4)   |
| C(9)-C(10)-C(11)-C(12)  | -175.8(3) |
| C(10)-C(11)-C(12)-C(13) | 1.3(4)    |
| C(10)-C(11)-C(12)-Cl(3) | -176.5(2) |
| C(11)-C(12)-C(13)-C(14) | 1.4(4)    |
| Cl(3)-C(12)-C(13)-C(14) | 179.2(2)  |
| C(11)-C(12)-C(13)-Cl(4) | -175.4(2) |
| Cl(3)-C(12)-C(13)-Cl(4) | 2.3(3)    |
| C(12)-C(13)-C(14)-C(15) | -2.5(4)   |
| Cl(4)-C(13)-C(14)-C(15) | 174.4(2)  |
| C(13)-C(14)-C(15)-C(10) | 0.8(4)    |
| C(13)-C(14)-C(15)-C(16) | 175.5(3)  |
| C(11)-C(10)-C(15)-C(14) | 2.0(4)    |
| C(9)-C(10)-C(15)-C(14)  | 176.4(2)  |
| C(11)-C(10)-C(15)-C(16) | -174.0(2) |
| C(9)-C(10)-C(15)-C(16)  | 0.4(3)    |
| C(17)-N(4)-C(16)-N(3)   | 9.4(4)    |
| C(17)-N(4)-C(16)-C(15)  | -153.8(3) |
| C(9)-N(3)-C(16)-N(4)    | -156.1(2) |
| B(1)-N(3)-C(16)-N(4)    | 9.1(4)    |
| C(9)-N(3)-C(16)-C(15)   | 10.7(3)   |
| B(1)-N(3)-C(16)-C(15)   | 175.8(2)  |
| C(14)-C(15)-C(16)-N(4)  | -16.3(5)  |



|                         |           |
|-------------------------|-----------|
| C(10)-C(15)-C(16)-N(4)  | 158.9(3)  |
| C(14)-C(15)-C(16)-N(3)  | 178.3(3)  |
| C(10)-C(15)-C(16)-N(3)  | -6.4(3)   |
| C(16)-N(4)-C(17)-N(5)   | -4.8(4)   |
| C(16)-N(4)-C(17)-C(18)  | 158.9(3)  |
| C(24)-N(5)-C(17)-N(4)   | 153.8(2)  |
| B(1)-N(5)-C(17)-N(4)    | -18.6(4)  |
| C(24)-N(5)-C(17)-C(18)  | -13.6(3)  |
| B(1)-N(5)-C(17)-C(18)   | 174.0(2)  |
| N(4)-C(17)-C(18)-C(19)  | 21.3(5)   |
| N(5)-C(17)-C(18)-C(19)  | -173.0(3) |
| N(4)-C(17)-C(18)-C(23)  | -158.5(3) |
| N(5)-C(17)-C(18)-C(23)  | 7.2(3)    |
| C(23)-C(18)-C(19)-C(20) | -1.3(4)   |
| C(17)-C(18)-C(19)-C(20) | 178.9(3)  |
| C(18)-C(19)-C(20)-C(21) | 1.4(4)    |
| C(18)-C(19)-C(20)-Cl(5) | -176.4(2) |
| C(19)-C(20)-C(21)-C(22) | -0.2(4)   |
| Cl(5)-C(20)-C(21)-C(22) | 177.6(2)  |
| C(19)-C(20)-C(21)-Cl(6) | -178.2(2) |
| Cl(5)-C(20)-C(21)-Cl(6) | -0.4(3)   |
| C(20)-C(21)-C(22)-C(23) | -1.1(4)   |
| Cl(6)-C(21)-C(22)-C(23) | 176.9(2)  |
| C(21)-C(22)-C(23)-C(18) | 1.2(4)    |
| C(21)-C(22)-C(23)-C(24) | 179.8(3)  |
| C(19)-C(18)-C(23)-C(22) | 0.0(4)    |
| C(17)-C(18)-C(23)-C(22) | 179.9(2)  |
| C(19)-C(18)-C(23)-C(24) | -178.9(2) |
| C(17)-C(18)-C(23)-C(24) | 0.9(3)    |
| C(1)-N(6)-C(24)-N(5)    | 5.9(4)    |
| C(1)-N(6)-C(24)-C(23)   | -159.0(3) |
| C(17)-N(5)-C(24)-N(6)   | -153.8(2) |
| B(1)-N(5)-C(24)-N(6)    | 18.6(4)   |
| C(17)-N(5)-C(24)-C(23)  | 14.3(3)   |
| B(1)-N(5)-C(24)-C(23)   | -173.3(2) |
| C(22)-C(23)-C(24)-N(6)  | -20.8(5)  |

|                         |           |
|-------------------------|-----------|
| C(18)-C(23)-C(24)-N(6)  | 158.0(3)  |
| C(22)-C(23)-C(24)-N(5)  | 172.4(3)  |
| C(18)-C(23)-C(24)-N(5)  | -8.8(3)   |
| B(1)-O(1)-C(25)-C(34)   | -85.2(3)  |
| B(1)-O(1)-C(25)-C(26)   | 98.0(3)   |
| C(34)-C(25)-C(26)-C(27) | 0.3(5)    |
| O(1)-C(25)-C(26)-C(27)  | 177.1(3)  |
| C(25)-C(26)-C(27)-C(28) | 0.7(5)    |
| C(26)-C(27)-C(28)-C(33) | -1.3(5)   |
| C(26)-C(27)-C(28)-C(29) | 179.4(3)  |
| C(27)-C(28)-C(29)-C(30) | 179.8(3)  |
| C(33)-C(28)-C(29)-C(30) | 0.4(5)    |
| C(28)-C(29)-C(30)-C(31) | -0.5(5)   |
| C(29)-C(30)-C(31)-C(32) | 0.3(5)    |
| C(30)-C(31)-C(32)-C(33) | 0.0(5)    |
| C(31)-C(32)-C(33)-C(28) | -0.1(5)   |
| C(31)-C(32)-C(33)-C(34) | 179.5(3)  |
| C(27)-C(28)-C(33)-C(32) | -179.5(3) |
| C(29)-C(28)-C(33)-C(32) | -0.1(4)   |
| C(27)-C(28)-C(33)-C(34) | 0.9(4)    |
| C(29)-C(28)-C(33)-C(34) | -179.7(3) |
| O(1)-C(25)-C(34)-C(33)  | -177.3(2) |
| C(26)-C(25)-C(34)-C(33) | -0.7(4)   |
| C(32)-C(33)-C(34)-C(25) | -179.5(3) |
| C(28)-C(33)-C(34)-C(25) | 0.1(4)    |
| C(25)-O(1)-B(1)-N(5)    | 69.6(3)   |
| C(25)-O(1)-B(1)-N(3)    | -52.9(4)  |
| C(25)-O(1)-B(1)-N(1)    | -172.1(2) |
| C(24)-N(5)-B(1)-O(1)    | 90.7(3)   |
| C(17)-N(5)-B(1)-O(1)    | -97.7(3)  |
| C(24)-N(5)-B(1)-N(3)    | -140.1(2) |
| C(17)-N(5)-B(1)-N(3)    | 31.5(3)   |
| C(24)-N(5)-B(1)-N(1)    | -31.5(3)  |
| C(17)-N(5)-B(1)-N(1)    | 140.1(2)  |
| C(9)-N(3)-B(1)-O(1)     | -94.0(3)  |
| C(16)-N(3)-B(1)-O(1)    | 102.2(3)  |

|                      |           |
|----------------------|-----------|
| C(9)-N(3)-B(1)-N(5)  | 137.0(2)  |
| C(16)-N(3)-B(1)-N(5) | -26.7(3)  |
| C(9)-N(3)-B(1)-N(1)  | 28.8(3)   |
| C(16)-N(3)-B(1)-N(1) | -134.9(2) |
| C(1)-N(1)-B(1)-O(1)  | -100.0(3) |
| C(8)-N(1)-B(1)-O(1)  | 97.5(3)   |
| C(1)-N(1)-B(1)-N(5)  | 25.6(3)   |
| C(8)-N(1)-B(1)-N(5)  | -136.8(2) |
| C(1)-N(1)-B(1)-N(3)  | 133.6(3)  |
| C(8)-N(1)-B(1)-N(3)  | -28.9(3)  |

---

Symmetry transformations used to generate equivalent atoms:

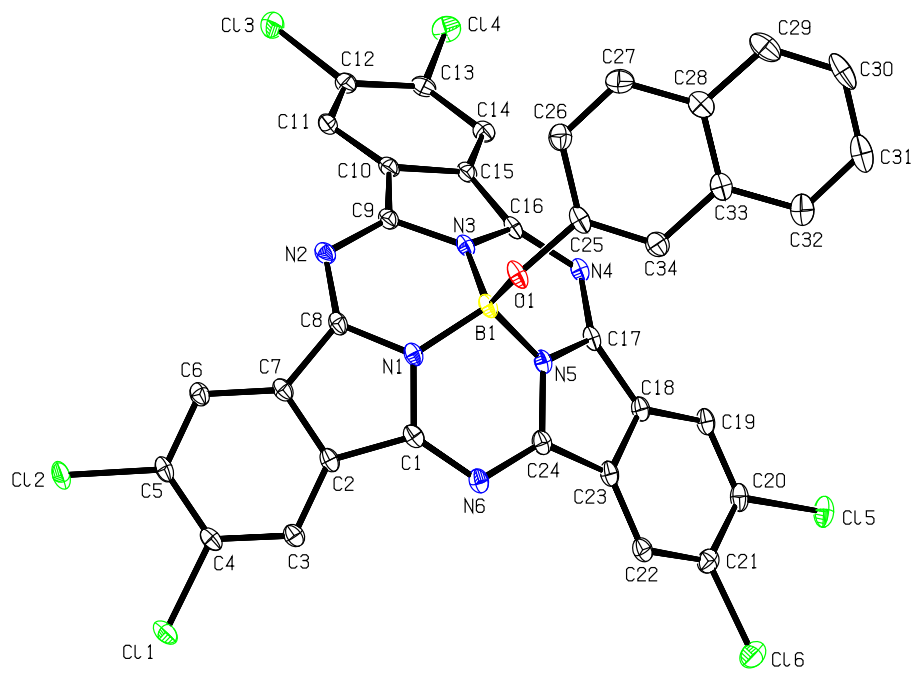

Figure S31: Anisotropic displacement ellipsoid plot of **NaphO-Cl<sub>6</sub>BsubPc (Dichlorobenzene:Heptane; CCDC deposit 2087104)**.

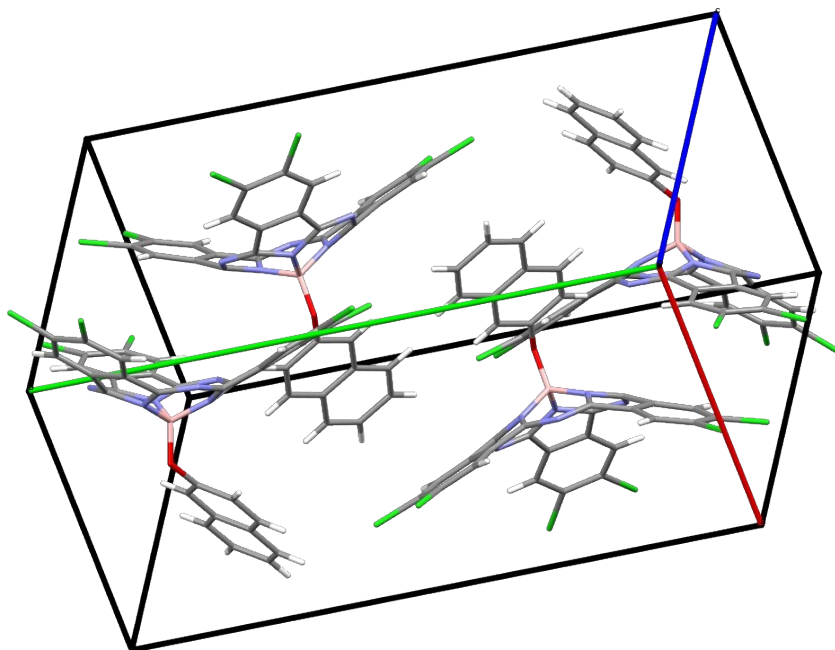

Figure S32: Populated unit cell of **NaphO-Cl<sub>6</sub>BsubPc** (Dichlorobenzene:Heptane; CCDC deposit 2087104).

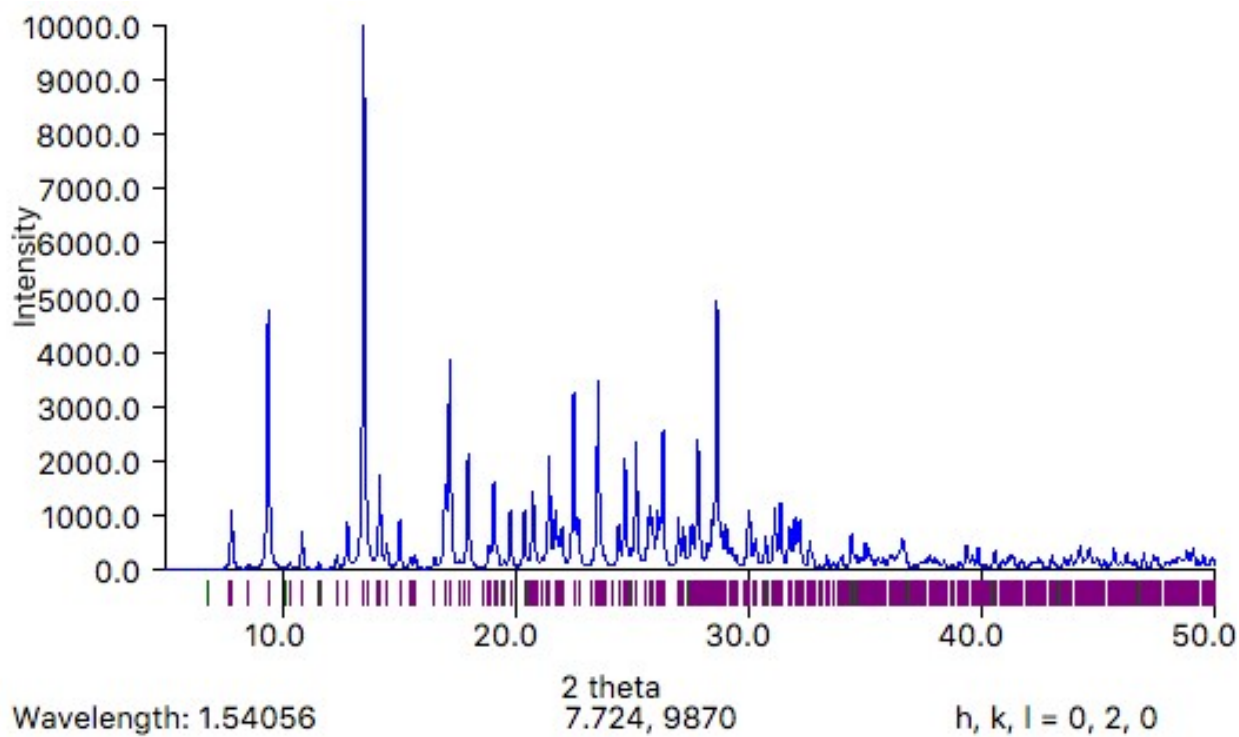

Figure S33: Powder x-ray diffraction **NaphO-Cl<sub>6</sub>BsubPc** (Dichlorobenzene:Heptane; CCDC deposit 2087104).

Table S 61. Crystal data and structure refinement for **NaphO-Cl<sub>6</sub>BsubPc (Dichlorobenzene:Heptane; CCDC deposit 2087104)**.

|                                   |                                                                    |                 |
|-----------------------------------|--------------------------------------------------------------------|-----------------|
| Identification code               | d19218_a                                                           |                 |
| Empirical formula                 | C <sub>34</sub> H <sub>13</sub> B Cl <sub>6</sub> N <sub>6</sub> O |                 |
| Formula weight                    | 745.01                                                             |                 |
| Temperature                       | 150(2) K                                                           |                 |
| Wavelength                        | 0.71073 Å                                                          |                 |
| Crystal system                    | Monoclinic                                                         |                 |
| Space group                       | P2 <sub>1</sub> /c                                                 |                 |
| Unit cell dimensions              | a = 10.4152(3) Å                                                   | α = 90°.        |
|                                   | b = 22.7421(7) Å                                                   | β = 98.286(1)°. |
|                                   | c = 13.1005(4) Å                                                   | γ = 90°.        |
| Volume                            | 3070.64(16) Å <sup>3</sup>                                         |                 |
| Z                                 | 4                                                                  |                 |
| Density (calculated)              | 1.612 Mg/m <sup>3</sup>                                            |                 |
| Absorption coefficient            | 0.602 mm <sup>-1</sup>                                             |                 |
| F(000)                            | 1496                                                               |                 |
| Crystal size                      | 0.220 x 0.160 x 0.120 mm <sup>3</sup>                              |                 |
| Theta range for data collection   | 1.791 to 27.536°.                                                  |                 |
| Index ranges                      | -13 ≤ h ≤ 9, -29 ≤ k ≤ 29, -17 ≤ l ≤ 17                            |                 |
| Reflections collected             | 44864                                                              |                 |
| Independent reflections           | 7072 [R(int) = 0.0355]                                             |                 |
| Completeness to theta = 25.242°   | 100.0 %                                                            |                 |
| Absorption correction             | Semi-empirical from equivalents                                    |                 |
| Max. and min. transmission        | 0.7456 and 0.7094                                                  |                 |
| Refinement method                 | Full-matrix least-squares on F <sup>2</sup>                        |                 |
| Data / restraints / parameters    | 7072 / 0 / 433                                                     |                 |
| Goodness-of-fit on F <sup>2</sup> | 1.024                                                              |                 |
| Final R indices [I > 2σ(I)]       | R1 = 0.0327, wR2 = 0.0745                                          |                 |
| R indices (all data)              | R1 = 0.0504, wR2 = 0.0829                                          |                 |
| Extinction coefficient            | n/a                                                                |                 |
| Largest diff. peak and hole       | 0.543 and -0.408 e.Å <sup>-3</sup>                                 |                 |

Table S 62. Atomic coordinates ( $\times 10^4$ ) and equivalent isotropic displacement parameters ( $\text{\AA}^2 \times 10^3$ ) for **NaphO-Cl<sub>6</sub>BsubPc (Dichlorobenzene:Heptane; CCDC deposit 2087104)**. U(eq) is defined as one third of the trace of the orthogonalized  $U^{ij}$  tensor.

|       | x        | y       | z        | U(eq) |
|-------|----------|---------|----------|-------|
| Cl(1) | 13885(1) | 4560(1) | 6105(1)  | 31(1) |
| Cl(2) | 14020(1) | 3318(1) | 7176(1)  | 34(1) |
| Cl(3) | 9330(1)  | 122(1)  | 3451(1)  | 35(1) |
| Cl(4) | 7503(1)  | 341(1)  | 1355(1)  | 31(1) |
| Cl(5) | 5751(1)  | 4635(1) | -1288(1) | 30(1) |
| Cl(6) | 7248(1)  | 5665(1) | 0(1)     | 35(1) |
| O(1)  | 6134(1)  | 3411(1) | 4700(1)  | 25(1) |
| N(1)  | 8461(1)  | 3452(1) | 4725(1)  | 20(1) |
| N(2)  | 9063(2)  | 2462(1) | 5140(1)  | 22(1) |
| N(3)  | 7331(1)  | 2672(1) | 3787(1)  | 19(1) |
| N(4)  | 6496(1)  | 2839(1) | 2014(1)  | 20(1) |
| N(5)  | 7144(1)  | 3635(1) | 3137(1)  | 19(1) |
| N(6)  | 8686(2)  | 4349(1) | 3832(1)  | 22(1) |
| C(1)  | 9091(2)  | 3964(1) | 4586(1)  | 20(1) |
| C(2)  | 10346(2) | 3921(1) | 5239(1)  | 20(1) |
| C(3)  | 11406(2) | 4300(1) | 5370(1)  | 22(1) |
| C(4)  | 12535(2) | 4105(1) | 5960(1)  | 22(1) |
| C(5)  | 12617(2) | 3544(1) | 6414(1)  | 23(1) |
| C(6)  | 11581(2) | 3156(1) | 6254(1)  | 22(1) |
| C(7)  | 10438(2) | 3349(1) | 5666(1)  | 20(1) |
| C(8)  | 9257(2)  | 3039(1) | 5256(1)  | 20(1) |
| C(9)  | 8164(2)  | 2291(1) | 4354(1)  | 21(1) |
| C(10) | 8124(2)  | 1754(1) | 3759(1)  | 21(1) |
| C(11) | 8777(2)  | 1224(1) | 3954(1)  | 23(1) |
| C(12) | 8597(2)  | 797(1)  | 3198(2)  | 24(1) |
| C(13) | 7800(2)  | 901(1)  | 2250(1)  | 22(1) |
| C(14) | 7189(2)  | 1434(1) | 2033(1)  | 21(1) |
| C(15) | 7344(2)  | 1866(1) | 2795(1)  | 20(1) |
| C(16) | 6919(2)  | 2474(1) | 2805(1)  | 20(1) |
| C(17) | 6660(2)  | 3416(1) | 2185(1)  | 20(1) |

|       |         |         |         |       |
|-------|---------|---------|---------|-------|
| C(18) | 6693(2) | 3911(1) | 1476(1) | 21(1) |
| C(19) | 6229(2) | 3986(1) | 432(1)  | 22(1) |
| C(20) | 6409(2) | 4527(1) | -14(1)  | 24(1) |
| C(21) | 7072(2) | 4985(1) | 557(2)  | 25(1) |
| C(22) | 7561(2) | 4913(1) | 1589(2) | 24(1) |
| C(23) | 7361(2) | 4378(1) | 2047(1) | 22(1) |
| C(24) | 7740(2) | 4165(1) | 3096(1) | 21(1) |
| C(25) | 4883(2) | 3228(1) | 4333(1) | 24(1) |
| C(26) | 4449(2) | 2693(1) | 4718(2) | 29(1) |
| C(27) | 3207(2) | 2508(1) | 4413(2) | 33(1) |
| C(28) | 2349(2) | 2843(1) | 3712(2) | 28(1) |
| C(29) | 1039(2) | 2659(1) | 3366(2) | 38(1) |
| C(30) | 242(2)  | 2989(1) | 2690(2) | 41(1) |
| C(31) | 676(2)  | 3524(1) | 2319(2) | 42(1) |
| C(32) | 1914(2) | 3714(1) | 2636(2) | 39(1) |
| C(33) | 2770(2) | 3380(1) | 3329(1) | 26(1) |
| C(34) | 4082(2) | 3565(1) | 3669(2) | 28(1) |
| B(1)  | 7172(2) | 3296(1) | 4119(2) | 21(1) |

---



Table S 63. Bond lengths [ $\text{\AA}$ ] and angles [ $^\circ$ ] for **NaphO-Cl<sub>6</sub>BsubPc (Dichlorobenzene:Heptane; CCDC deposit 2087104)**.

---

|             |            |
|-------------|------------|
| Cl(1)-C(4)  | 1.7340(18) |
| Cl(2)-C(5)  | 1.7243(18) |
| Cl(3)-C(12) | 1.7255(19) |
| Cl(4)-C(13) | 1.7286(18) |
| Cl(5)-C(20) | 1.7294(19) |
| Cl(6)-C(21) | 1.7294(19) |
| O(1)-C(25)  | 1.386(2)   |
| O(1)-B(1)   | 1.434(2)   |
| N(1)-C(1)   | 1.363(2)   |
| N(1)-C(8)   | 1.372(2)   |
| N(1)-B(1)   | 1.500(2)   |
| N(2)-C(8)   | 1.335(2)   |
| N(2)-C(9)   | 1.345(2)   |
| N(3)-C(9)   | 1.367(2)   |
| N(3)-C(16)  | 1.373(2)   |
| N(3)-B(1)   | 1.501(3)   |
| N(4)-C(17)  | 1.338(2)   |
| N(4)-C(16)  | 1.351(2)   |
| N(5)-C(24)  | 1.361(2)   |
| N(5)-C(17)  | 1.370(2)   |
| N(5)-B(1)   | 1.496(3)   |
| N(6)-C(1)   | 1.341(2)   |
| N(6)-C(24)  | 1.343(2)   |
| C(1)-C(2)   | 1.459(2)   |
| C(2)-C(3)   | 1.391(2)   |
| C(2)-C(7)   | 1.413(3)   |
| C(3)-C(4)   | 1.384(3)   |
| C(3)-H(3A)  | 0.9500     |
| C(4)-C(5)   | 1.406(3)   |
| C(5)-C(6)   | 1.384(3)   |
| C(6)-C(7)   | 1.392(2)   |
| C(6)-H(6A)  | 0.9500     |

|              |          |
|--------------|----------|
| C(7)-C(8)    | 1.452(2) |
| C(9)-C(10)   | 1.447(3) |
| C(10)-C(11)  | 1.389(3) |
| C(10)-C(15)  | 1.422(2) |
| C(11)-C(12)  | 1.380(3) |
| C(11)-H(11A) | 0.9500   |
| C(12)-C(13)  | 1.410(3) |
| C(13)-C(14)  | 1.380(3) |
| C(14)-C(15)  | 1.393(2) |
| C(14)-H(14A) | 0.9500   |
| C(15)-C(16)  | 1.453(3) |
| C(17)-C(18)  | 1.463(3) |
| C(18)-C(19)  | 1.393(2) |
| C(18)-C(23)  | 1.421(3) |
| C(19)-C(20)  | 1.385(3) |
| C(19)-H(19A) | 0.9500   |
| C(20)-C(21)  | 1.405(3) |
| C(21)-C(22)  | 1.384(3) |
| C(22)-C(23)  | 1.385(3) |
| C(22)-H(22A) | 0.9500   |
| C(23)-C(24)  | 1.457(3) |
| C(25)-C(34)  | 1.353(3) |
| C(25)-C(26)  | 1.418(3) |
| C(26)-C(27)  | 1.365(3) |
| C(26)-H(26A) | 0.9500   |
| C(27)-C(28)  | 1.410(3) |
| C(27)-H(27A) | 0.9500   |
| C(28)-C(33)  | 1.413(3) |
| C(28)-C(29)  | 1.436(3) |
| C(29)-C(30)  | 1.351(3) |
| C(29)-H(29A) | 0.9500   |
| C(30)-C(31)  | 1.408(4) |
| C(30)-H(30A) | 0.9500   |
| C(31)-C(32)  | 1.366(3) |
| C(31)-H(31A) | 0.9500   |
| C(32)-C(33)  | 1.402(3) |

|                  |            |
|------------------|------------|
| C(32)-H(32A)     | 0.9500     |
| C(33)-C(34)      | 1.437(3)   |
| C(34)-H(34A)     | 0.9500     |
| C(25)-O(1)-B(1)  | 120.29(14) |
| C(1)-N(1)-C(8)   | 112.65(14) |
| C(1)-N(1)-B(1)   | 122.79(15) |
| C(8)-N(1)-B(1)   | 122.46(15) |
| C(8)-N(2)-C(9)   | 116.67(16) |
| C(9)-N(3)-C(16)  | 112.94(15) |
| C(9)-N(3)-B(1)   | 122.02(15) |
| C(16)-N(3)-B(1)  | 123.27(15) |
| C(17)-N(4)-C(16) | 116.98(15) |
| C(24)-N(5)-C(17) | 113.36(15) |
| C(24)-N(5)-B(1)  | 122.52(15) |
| C(17)-N(5)-B(1)  | 123.69(15) |
| C(1)-N(6)-C(24)  | 116.49(16) |
| N(6)-C(1)-N(1)   | 123.41(16) |
| N(6)-C(1)-C(2)   | 129.53(17) |
| N(1)-C(1)-C(2)   | 105.70(15) |
| C(3)-C(2)-C(7)   | 120.93(16) |
| C(3)-C(2)-C(1)   | 131.10(17) |
| C(7)-C(2)-C(1)   | 107.41(15) |
| C(4)-C(3)-C(2)   | 117.76(17) |
| C(4)-C(3)-H(3A)  | 121.1      |
| C(2)-C(3)-H(3A)  | 121.1      |
| C(3)-C(4)-C(5)   | 121.42(17) |
| C(3)-C(4)-Cl(1)  | 118.75(15) |
| C(5)-C(4)-Cl(1)  | 119.79(14) |
| C(6)-C(5)-C(4)   | 121.02(17) |
| C(6)-C(5)-Cl(2)  | 118.37(15) |
| C(4)-C(5)-Cl(2)  | 120.60(14) |
| C(5)-C(6)-C(7)   | 117.97(17) |
| C(5)-C(6)-H(6A)  | 121.0      |
| C(7)-C(6)-H(6A)  | 121.0      |
| C(6)-C(7)-C(2)   | 120.81(16) |

|                    |            |
|--------------------|------------|
| C(6)-C(7)-C(8)     | 131.59(17) |
| C(2)-C(7)-C(8)     | 107.11(15) |
| N(2)-C(8)-N(1)     | 122.96(16) |
| N(2)-C(8)-C(7)     | 128.76(17) |
| N(1)-C(8)-C(7)     | 105.90(15) |
| N(2)-C(9)-N(3)     | 123.36(16) |
| N(2)-C(9)-C(10)    | 128.26(17) |
| N(3)-C(9)-C(10)    | 106.01(15) |
| C(11)-C(10)-C(15)  | 121.40(17) |
| C(11)-C(10)-C(9)   | 131.15(17) |
| C(15)-C(10)-C(9)   | 107.15(16) |
| C(12)-C(11)-C(10)  | 117.78(17) |
| C(12)-C(11)-H(11A) | 121.1      |
| C(10)-C(11)-H(11A) | 121.1      |
| C(11)-C(12)-C(13)  | 121.01(17) |
| C(11)-C(12)-Cl(3)  | 118.52(15) |
| C(13)-C(12)-Cl(3)  | 120.44(15) |
| C(14)-C(13)-C(12)  | 121.64(17) |
| C(14)-C(13)-Cl(4)  | 118.38(14) |
| C(12)-C(13)-Cl(4)  | 119.89(15) |
| C(13)-C(14)-C(15)  | 117.98(17) |
| C(13)-C(14)-H(14A) | 121.0      |
| C(15)-C(14)-H(14A) | 121.0      |
| C(14)-C(15)-C(10)  | 120.11(17) |
| C(14)-C(15)-C(16)  | 132.32(17) |
| C(10)-C(15)-C(16)  | 107.42(15) |
| N(4)-C(16)-N(3)    | 122.78(16) |
| N(4)-C(16)-C(15)   | 130.12(16) |
| N(3)-C(16)-C(15)   | 105.39(15) |
| N(4)-C(17)-N(5)    | 122.08(16) |
| N(4)-C(17)-C(18)   | 131.41(16) |
| N(5)-C(17)-C(18)   | 105.05(15) |
| C(19)-C(18)-C(23)  | 119.91(17) |
| C(19)-C(18)-C(17)  | 132.98(17) |
| C(23)-C(18)-C(17)  | 107.11(15) |
| C(20)-C(19)-C(18)  | 118.29(17) |

|                    |            |
|--------------------|------------|
| C(20)-C(19)-H(19A) | 120.9      |
| C(18)-C(19)-H(19A) | 120.9      |
| C(19)-C(20)-C(21)  | 121.36(17) |
| C(19)-C(20)-Cl(5)  | 118.34(15) |
| C(21)-C(20)-Cl(5)  | 120.27(15) |
| C(22)-C(21)-C(20)  | 120.95(17) |
| C(22)-C(21)-Cl(6)  | 118.21(15) |
| C(20)-C(21)-Cl(6)  | 120.81(15) |
| C(21)-C(22)-C(23)  | 118.07(18) |
| C(21)-C(22)-H(22A) | 121.0      |
| C(23)-C(22)-H(22A) | 121.0      |
| C(22)-C(23)-C(18)  | 121.40(17) |
| C(22)-C(23)-C(24)  | 131.45(17) |
| C(18)-C(23)-C(24)  | 107.15(16) |
| N(6)-C(24)-N(5)    | 122.62(16) |
| N(6)-C(24)-C(23)   | 130.23(17) |
| N(5)-C(24)-C(23)   | 105.53(15) |
| C(34)-C(25)-O(1)   | 121.07(18) |
| C(34)-C(25)-C(26)  | 121.10(18) |
| O(1)-C(25)-C(26)   | 117.74(17) |
| C(27)-C(26)-C(25)  | 119.90(19) |
| C(27)-C(26)-H(26A) | 120.1      |
| C(25)-C(26)-H(26A) | 120.1      |
| C(26)-C(27)-C(28)  | 120.59(19) |
| C(26)-C(27)-H(27A) | 119.7      |
| C(28)-C(27)-H(27A) | 119.7      |
| C(27)-C(28)-C(33)  | 119.91(18) |
| C(27)-C(28)-C(29)  | 122.2(2)   |
| C(33)-C(28)-C(29)  | 117.9(2)   |
| C(30)-C(29)-C(28)  | 120.8(2)   |
| C(30)-C(29)-H(29A) | 119.6      |
| C(28)-C(29)-H(29A) | 119.6      |
| C(29)-C(30)-C(31)  | 120.5(2)   |
| C(29)-C(30)-H(30A) | 119.7      |
| C(31)-C(30)-H(30A) | 119.7      |
| C(32)-C(31)-C(30)  | 120.3(2)   |

|                    |            |
|--------------------|------------|
| C(32)-C(31)-H(31A) | 119.8      |
| C(30)-C(31)-H(31A) | 119.8      |
| C(31)-C(32)-C(33)  | 120.6(2)   |
| C(31)-C(32)-H(32A) | 119.7      |
| C(33)-C(32)-H(32A) | 119.7      |
| C(32)-C(33)-C(28)  | 119.82(19) |
| C(32)-C(33)-C(34)  | 121.9(2)   |
| C(28)-C(33)-C(34)  | 118.28(18) |
| C(25)-C(34)-C(33)  | 120.22(19) |
| C(25)-C(34)-H(34A) | 119.9      |
| C(33)-C(34)-H(34A) | 119.9      |
| O(1)-B(1)-N(5)     | 116.15(16) |
| O(1)-B(1)-N(1)     | 111.22(15) |
| N(5)-B(1)-N(1)     | 103.85(15) |
| O(1)-B(1)-N(3)     | 116.65(16) |
| N(5)-B(1)-N(3)     | 103.15(14) |
| N(1)-B(1)-N(3)     | 104.38(15) |

---

Symmetry transformations used to generate equivalent atoms:

Table S 64. Anisotropic displacement parameters ( $\text{\AA}^2 \times 10^3$ ) for **NaphO-Cl<sub>6</sub>BsubPc (Dichlorobenzene:Heptane; CCDC deposit 2087104)**. The anisotropic displacement factor exponent takes the form:  $-2\pi^2 [ h^2 a^{*2} U^{11} + \dots + 2 h k a^* b^* U^{12} ]$

|       | U <sup>11</sup> | U <sup>22</sup> | U <sup>33</sup> | U <sup>23</sup> | U <sup>13</sup> | U <sup>12</sup> |
|-------|-----------------|-----------------|-----------------|-----------------|-----------------|-----------------|
| Cl(1) | 21(1)           | 36(1)           | 36(1)           | -4(1)           | -2(1)           | -9(1)           |
| Cl(2) | 19(1)           | 46(1)           | 34(1)           | 6(1)            | -9(1)           | -2(1)           |
| Cl(3) | 27(1)           | 28(1)           | 49(1)           | 2(1)            | -2(1)           | 4(1)            |
| Cl(4) | 39(1)           | 27(1)           | 28(1)           | -6(1)           | 8(1)            | 0(1)            |
| Cl(5) | 27(1)           | 44(1)           | 19(1)           | 3(1)            | 2(1)            | 11(1)           |
| Cl(6) | 39(1)           | 32(1)           | 36(1)           | 9(1)            | 6(1)            | 5(1)            |
| O(1)  | 14(1)           | 40(1)           | 19(1)           | -10(1)          | 0(1)            | -1(1)           |
| N(1)  | 16(1)           | 27(1)           | 16(1)           | -3(1)           | 1(1)            | 0(1)            |
| N(2)  | 20(1)           | 30(1)           | 16(1)           | 1(1)            | 1(1)            | -5(1)           |
| N(3)  | 14(1)           | 27(1)           | 15(1)           | -2(1)           | 0(1)            | -2(1)           |
| N(4)  | 15(1)           | 27(1)           | 18(1)           | -2(1)           | 0(1)            | 0(1)            |
| N(5)  | 16(1)           | 24(1)           | 17(1)           | -4(1)           | -1(1)           | 2(1)            |
| N(6)  | 19(1)           | 24(1)           | 21(1)           | -6(1)           | 0(1)            | 3(1)            |
| C(1)  | 17(1)           | 24(1)           | 19(1)           | -8(1)           | 3(1)            | 0(1)            |
| C(2)  | 17(1)           | 26(1)           | 16(1)           | -6(1)           | 0(1)            | 0(1)            |
| C(3)  | 21(1)           | 24(1)           | 21(1)           | -5(1)           | 1(1)            | -2(1)           |
| C(4)  | 17(1)           | 30(1)           | 20(1)           | -6(1)           | 2(1)            | -4(1)           |
| C(5)  | 16(1)           | 34(1)           | 17(1)           | -4(1)           | -2(1)           | -1(1)           |
| C(6)  | 19(1)           | 30(1)           | 18(1)           | -1(1)           | 0(1)            | -1(1)           |
| C(7)  | 18(1)           | 28(1)           | 15(1)           | -4(1)           | 1(1)            | -3(1)           |
| C(8)  | 17(1)           | 30(1)           | 13(1)           | -1(1)           | 1(1)            | -2(1)           |
| C(9)  | 17(1)           | 27(1)           | 17(1)           | 2(1)            | 2(1)            | -4(1)           |
| C(10) | 16(1)           | 27(1)           | 20(1)           | 1(1)            | 2(1)            | -6(1)           |
| C(11) | 16(1)           | 28(1)           | 24(1)           | 4(1)            | -1(1)           | -4(1)           |
| C(12) | 18(1)           | 24(1)           | 32(1)           | 4(1)            | 5(1)            | -2(1)           |
| C(13) | 21(1)           | 25(1)           | 23(1)           | -4(1)           | 7(1)            | -5(1)           |
| C(14) | 20(1)           | 27(1)           | 17(1)           | -1(1)           | 5(1)            | -4(1)           |
| C(15) | 15(1)           | 26(1)           | 20(1)           | 1(1)            | 2(1)            | -3(1)           |
| C(16) | 12(1)           | 29(1)           | 18(1)           | -4(1)           | 0(1)            | -3(1)           |
| C(17) | 14(1)           | 28(1)           | 17(1)           | -4(1)           | -1(1)           | 2(1)            |

|       |       |       |       |        |       |        |
|-------|-------|-------|-------|--------|-------|--------|
| C(18) | 16(1) | 26(1) | 22(1) | -3(1)  | 1(1)  | 5(1)   |
| C(19) | 17(1) | 29(1) | 19(1) | -4(1)  | 0(1)  | 6(1)   |
| C(20) | 18(1) | 36(1) | 18(1) | -1(1)  | 3(1)  | 9(1)   |
| C(21) | 21(1) | 26(1) | 28(1) | 4(1)   | 8(1)  | 6(1)   |
| C(22) | 17(1) | 27(1) | 27(1) | -2(1)  | 2(1)  | 3(1)   |
| C(23) | 16(1) | 28(1) | 22(1) | -3(1)  | 1(1)  | 5(1)   |
| C(24) | 17(1) | 24(1) | 22(1) | -5(1)  | 2(1)  | 4(1)   |
| C(25) | 16(1) | 36(1) | 18(1) | -10(1) | 2(1)  | 1(1)   |
| C(26) | 28(1) | 34(1) | 25(1) | 1(1)   | 3(1)  | 3(1)   |
| C(27) | 35(1) | 32(1) | 33(1) | 2(1)   | 9(1)  | -5(1)  |
| C(28) | 26(1) | 36(1) | 23(1) | -8(1)  | 8(1)  | -2(1)  |
| C(29) | 28(1) | 53(1) | 35(1) | -14(1) | 12(1) | -10(1) |
| C(30) | 15(1) | 71(2) | 36(1) | -22(1) | 3(1)  | -2(1)  |
| C(31) | 27(1) | 62(2) | 36(1) | -10(1) | -4(1) | 11(1)  |
| C(32) | 32(1) | 44(1) | 39(1) | 1(1)   | -1(1) | 7(1)   |
| C(33) | 23(1) | 33(1) | 22(1) | -6(1)  | 4(1)  | 4(1)   |
| C(34) | 26(1) | 30(1) | 27(1) | -2(1)  | 4(1)  | 0(1)   |
| B(1)  | 16(1) | 28(1) | 17(1) | -5(1)  | -1(1) | -1(1)  |

---



Table S 65. Hydrogen coordinates ( $\times 10^4$ ) and isotropic displacement parameters ( $\text{\AA}^2 \times 10^{-3}$ ) for **NaphO-Cl<sub>6</sub>BsubPc (Dichlorobenzene:Heptane; CCDC deposit 2087104)**.

|        | x     | y    | z    | U(eq) |
|--------|-------|------|------|-------|
| H(3A)  | 11355 | 4679 | 5064 | 26    |
| H(6A)  | 11649 | 2771 | 6537 | 27    |
| H(11A) | 9329  | 1158 | 4586 | 28    |
| H(14A) | 6679  | 1505 | 1383 | 25    |
| H(19A) | 5801  | 3675 | 36   | 27    |
| H(22A) | 8020  | 5221 | 1973 | 28    |
| H(26A) | 5022  | 2463 | 5188 | 35    |
| H(27A) | 2918  | 2149 | 4675 | 40    |
| H(29A) | 730   | 2301 | 3615 | 45    |
| H(30A) | -619  | 2860 | 2463 | 49    |
| H(31A) | 106   | 3754 | 1847 | 51    |
| H(32A) | 2197  | 4076 | 2383 | 46    |
| H(34A) | 4386  | 3926 | 3426 | 33    |

Table S 66. Torsion angles [°] for **NaphO-Cl<sub>6</sub>BsubPc (Dichlorobenzene:Heptane; CCDC deposit 2087104)**.

---

|                       |             |
|-----------------------|-------------|
| C(24)-N(6)-C(1)-N(1)  | -11.0(2)    |
| C(24)-N(6)-C(1)-C(2)  | 153.74(18)  |
| C(8)-N(1)-C(1)-N(6)   | 157.10(16)  |
| B(1)-N(1)-C(1)-N(6)   | -6.8(3)     |
| C(8)-N(1)-C(1)-C(2)   | -10.72(19)  |
| B(1)-N(1)-C(1)-C(2)   | -174.58(15) |
| N(6)-C(1)-C(2)-C(3)   | 9.8(3)      |
| N(1)-C(1)-C(2)-C(3)   | 176.61(18)  |
| N(6)-C(1)-C(2)-C(7)   | -161.44(17) |
| N(1)-C(1)-C(2)-C(7)   | 5.35(19)    |
| C(7)-C(2)-C(3)-C(4)   | -2.2(3)     |
| C(1)-C(2)-C(3)-C(4)   | -172.44(18) |
| C(2)-C(3)-C(4)-C(5)   | 0.1(3)      |
| C(2)-C(3)-C(4)-Cl(1)  | 178.17(13)  |
| C(3)-C(4)-C(5)-C(6)   | 2.4(3)      |
| Cl(1)-C(4)-C(5)-C(6)  | -175.66(14) |
| C(3)-C(4)-C(5)-Cl(2)  | -178.21(14) |
| Cl(1)-C(4)-C(5)-Cl(2) | 3.8(2)      |
| C(4)-C(5)-C(6)-C(7)   | -2.7(3)     |
| Cl(2)-C(5)-C(6)-C(7)  | 177.88(14)  |
| C(5)-C(6)-C(7)-C(2)   | 0.6(3)      |
| C(5)-C(6)-C(7)-C(8)   | 171.40(18)  |
| C(3)-C(2)-C(7)-C(6)   | 1.8(3)      |
| C(1)-C(2)-C(7)-C(6)   | 174.16(16)  |
| C(3)-C(2)-C(7)-C(8)   | -170.96(16) |
| C(1)-C(2)-C(7)-C(8)   | 1.37(19)    |
| C(9)-N(2)-C(8)-N(1)   | 10.3(2)     |
| C(9)-N(2)-C(8)-C(7)   | -149.67(18) |
| C(1)-N(1)-C(8)-N(2)   | -152.24(16) |
| B(1)-N(1)-C(8)-N(2)   | 11.7(3)     |
| C(1)-N(1)-C(8)-C(7)   | 11.60(19)   |
| B(1)-N(1)-C(8)-C(7)   | 175.53(15)  |
| C(6)-C(7)-C(8)-N(2)   | -16.7(3)    |

|                         |             |
|-------------------------|-------------|
| C(2)-C(7)-C(8)-N(2)     | 155.03(17)  |
| C(6)-C(7)-C(8)-N(1)     | -179.26(18) |
| C(2)-C(7)-C(8)-N(1)     | -7.55(19)   |
| C(8)-N(2)-C(9)-N(3)     | -10.1(2)    |
| C(8)-N(2)-C(9)-C(10)    | 149.92(18)  |
| C(16)-N(3)-C(9)-N(2)    | 153.30(16)  |
| B(1)-N(3)-C(9)-N(2)     | -12.0(3)    |
| C(16)-N(3)-C(9)-C(10)   | -10.49(19)  |
| B(1)-N(3)-C(9)-C(10)    | -175.80(15) |
| N(2)-C(9)-C(10)-C(11)   | 16.8(3)     |
| N(3)-C(9)-C(10)-C(11)   | 179.48(18)  |
| N(2)-C(9)-C(10)-C(15)   | -156.91(17) |
| N(3)-C(9)-C(10)-C(15)   | 5.82(19)    |
| C(15)-C(10)-C(11)-C(12) | -3.0(3)     |
| C(9)-C(10)-C(11)-C(12)  | -175.91(17) |
| C(10)-C(11)-C(12)-C(13) | 1.4(3)      |
| C(10)-C(11)-C(12)-Cl(3) | -176.61(13) |
| C(11)-C(12)-C(13)-C(14) | 1.2(3)      |
| Cl(3)-C(12)-C(13)-C(14) | 179.23(14)  |
| C(11)-C(12)-C(13)-Cl(4) | -175.51(14) |
| Cl(3)-C(12)-C(13)-Cl(4) | 2.5(2)      |
| C(12)-C(13)-C(14)-C(15) | -2.3(3)     |
| Cl(4)-C(13)-C(14)-C(15) | 174.52(13)  |
| C(13)-C(14)-C(15)-C(10) | 0.7(3)      |
| C(13)-C(14)-C(15)-C(16) | 175.56(18)  |
| C(11)-C(10)-C(15)-C(14) | 2.0(3)      |
| C(9)-C(10)-C(15)-C(14)  | 176.40(15)  |
| C(11)-C(10)-C(15)-C(16) | -174.04(16) |
| C(9)-C(10)-C(15)-C(16)  | 0.37(19)    |
| C(17)-N(4)-C(16)-N(3)   | 9.2(2)      |
| C(17)-N(4)-C(16)-C(15)  | -153.63(18) |
| C(9)-N(3)-C(16)-N(4)    | -155.78(16) |
| B(1)-N(3)-C(16)-N(4)    | 9.3(3)      |
| C(9)-N(3)-C(16)-C(15)   | 10.66(19)   |
| B(1)-N(3)-C(16)-C(15)   | 175.76(15)  |
| C(14)-C(15)-C(16)-N(4)  | -16.7(3)    |

|                         |             |
|-------------------------|-------------|
| C(10)-C(15)-C(16)-N(4)  | 158.69(18)  |
| C(14)-C(15)-C(16)-N(3)  | 178.27(18)  |
| C(10)-C(15)-C(16)-N(3)  | -6.38(18)   |
| C(16)-N(4)-C(17)-N(5)   | -4.8(2)     |
| C(16)-N(4)-C(17)-C(18)  | 159.23(18)  |
| C(24)-N(5)-C(17)-N(4)   | 154.17(16)  |
| B(1)-N(5)-C(17)-N(4)    | -18.5(3)    |
| C(24)-N(5)-C(17)-C(18)  | -13.50(19)  |
| B(1)-N(5)-C(17)-C(18)   | 173.85(15)  |
| N(4)-C(17)-C(18)-C(19)  | 20.7(3)     |
| N(5)-C(17)-C(18)-C(19)  | -173.21(18) |
| N(4)-C(17)-C(18)-C(23)  | -158.60(18) |
| N(5)-C(17)-C(18)-C(23)  | 7.45(19)    |
| C(23)-C(18)-C(19)-C(20) | -1.6(3)     |
| C(17)-C(18)-C(19)-C(20) | 179.09(18)  |
| C(18)-C(19)-C(20)-C(21) | 1.7(3)      |
| C(18)-C(19)-C(20)-Cl(5) | -176.22(13) |
| C(19)-C(20)-C(21)-C(22) | -0.4(3)     |
| Cl(5)-C(20)-C(21)-C(22) | 177.47(14)  |
| C(19)-C(20)-C(21)-Cl(6) | -178.12(14) |
| Cl(5)-C(20)-C(21)-Cl(6) | -0.2(2)     |
| C(20)-C(21)-C(22)-C(23) | -0.9(3)     |
| Cl(6)-C(21)-C(22)-C(23) | 176.80(13)  |
| C(21)-C(22)-C(23)-C(18) | 1.0(3)      |
| C(21)-C(22)-C(23)-C(24) | -179.84(18) |
| C(19)-C(18)-C(23)-C(22) | 0.3(3)      |
| C(17)-C(18)-C(23)-C(22) | 179.73(16)  |
| C(19)-C(18)-C(23)-C(24) | -179.05(16) |
| C(17)-C(18)-C(23)-C(24) | 0.39(19)    |
| C(1)-N(6)-C(24)-N(5)    | 4.7(2)      |
| C(1)-N(6)-C(24)-C(23)   | -158.67(18) |
| C(17)-N(5)-C(24)-N(6)   | -153.07(16) |
| B(1)-N(5)-C(24)-N(6)    | 19.7(3)     |
| C(17)-N(5)-C(24)-C(23)  | 13.80(19)   |
| B(1)-N(5)-C(24)-C(23)   | -173.46(15) |
| C(22)-C(23)-C(24)-N(6)  | -21.9(3)    |

|                         |             |
|-------------------------|-------------|
| C(18)-C(23)-C(24)-N(6)  | 157.33(18)  |
| C(22)-C(23)-C(24)-N(5)  | 172.60(18)  |
| C(18)-C(23)-C(24)-N(5)  | -8.15(19)   |
| B(1)-O(1)-C(25)-C(34)   | -85.6(2)    |
| B(1)-O(1)-C(25)-C(26)   | 97.7(2)     |
| C(34)-C(25)-C(26)-C(27) | 0.5(3)      |
| O(1)-C(25)-C(26)-C(27)  | 177.19(17)  |
| C(25)-C(26)-C(27)-C(28) | 0.3(3)      |
| C(26)-C(27)-C(28)-C(33) | -0.7(3)     |
| C(26)-C(27)-C(28)-C(29) | 179.35(19)  |
| C(27)-C(28)-C(29)-C(30) | -179.7(2)   |
| C(33)-C(28)-C(29)-C(30) | 0.3(3)      |
| C(28)-C(29)-C(30)-C(31) | -0.6(3)     |
| C(29)-C(30)-C(31)-C(32) | 0.3(3)      |
| C(30)-C(31)-C(32)-C(33) | 0.3(3)      |
| C(31)-C(32)-C(33)-C(28) | -0.6(3)     |
| C(31)-C(32)-C(33)-C(34) | 179.4(2)    |
| C(27)-C(28)-C(33)-C(32) | -179.74(19) |
| C(29)-C(28)-C(33)-C(32) | 0.3(3)      |
| C(27)-C(28)-C(33)-C(34) | 0.3(3)      |
| C(29)-C(28)-C(33)-C(34) | -179.72(17) |
| O(1)-C(25)-C(34)-C(33)  | -177.44(16) |
| C(26)-C(25)-C(34)-C(33) | -0.9(3)     |
| C(32)-C(33)-C(34)-C(25) | -179.49(19) |
| C(28)-C(33)-C(34)-C(25) | 0.5(3)      |
| C(25)-O(1)-B(1)-N(5)    | 69.8(2)     |
| C(25)-O(1)-B(1)-N(1)    | -171.75(16) |
| C(25)-O(1)-B(1)-N(3)    | -52.2(2)    |
| C(24)-N(5)-B(1)-O(1)    | 90.4(2)     |
| C(17)-N(5)-B(1)-O(1)    | -97.6(2)    |
| C(24)-N(5)-B(1)-N(1)    | -32.0(2)    |
| C(17)-N(5)-B(1)-N(1)    | 139.99(16)  |
| C(24)-N(5)-B(1)-N(3)    | -140.67(16) |
| C(17)-N(5)-B(1)-N(3)    | 31.3(2)     |
| C(1)-N(1)-B(1)-O(1)     | -99.85(19)  |
| C(8)-N(1)-B(1)-O(1)     | 97.8(2)     |

|                      |             |
|----------------------|-------------|
| C(1)-N(1)-B(1)-N(5)  | 25.8(2)     |
| C(8)-N(1)-B(1)-N(5)  | -136.52(16) |
| C(1)-N(1)-B(1)-N(3)  | 133.55(16)  |
| C(8)-N(1)-B(1)-N(3)  | -28.8(2)    |
| C(9)-N(3)-B(1)-O(1)  | -94.3(2)    |
| C(16)-N(3)-B(1)-O(1) | 101.88(19)  |
| C(9)-N(3)-B(1)-N(5)  | 137.08(16)  |
| C(16)-N(3)-B(1)-N(5) | -26.7(2)    |
| C(9)-N(3)-B(1)-N(1)  | 28.8(2)     |
| C(16)-N(3)-B(1)-N(1) | -134.98(16) |

---

Symmetry transformations used to generate equivalent atoms:

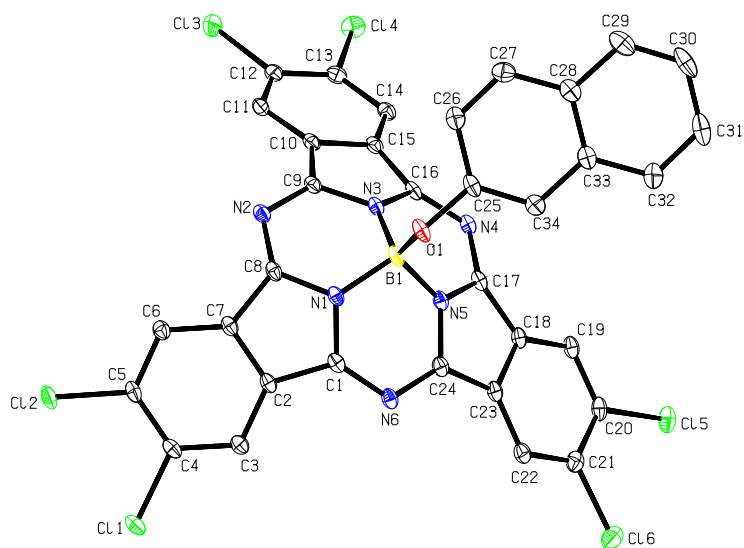

Figure S34: Anisotropic displacement ellipsoid plot of **NaphO-Cl<sub>6</sub> BsubPc** (**Dichlorobenzene:Dimethoxybenzene:Heptane**; CCDC deposit 2087102).

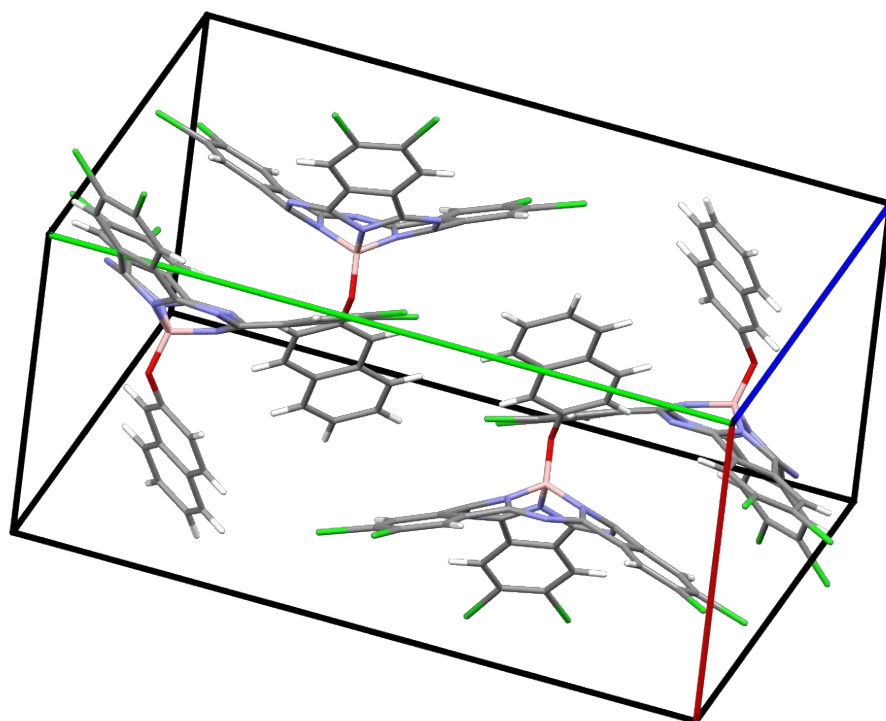

Figure S35: Populated unit cell of NaphO-Cl<sub>6</sub>BsubPc (Dichlorobenzene:Dimethoxybenzene:Heptane; CCDC deposit 2087102).

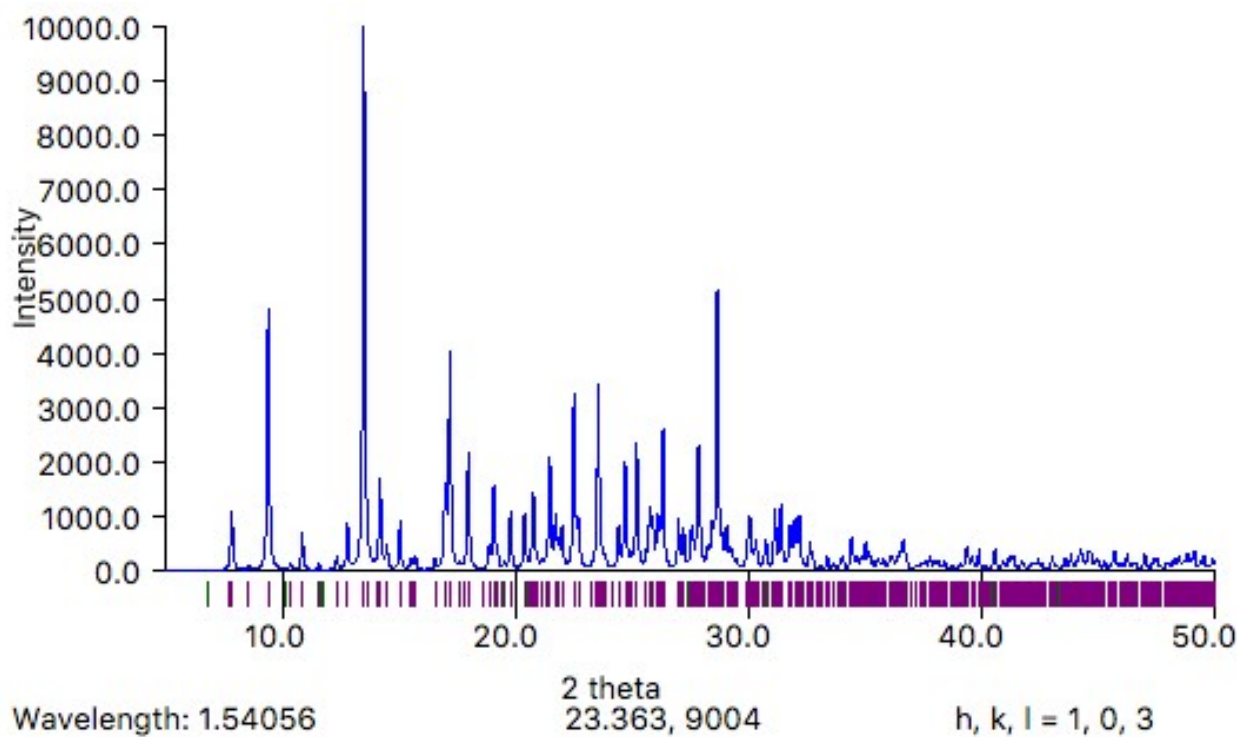

Figure S 36: Powder x-ray diffraction of NaphO-Cl<sub>6</sub>BsubPc (Dichlorobenzene:Dimethoxybenzene:Heptane; CCDC deposit 2087102).





Table S 67. Crystal data and structure refinement for **NaphO-Cl<sub>6</sub>BsubPc (Dichlorobenzene:Dimethoxybenzene:Heptane; CCDC deposit 2087102)**.

|                                   |                                                                    |                 |
|-----------------------------------|--------------------------------------------------------------------|-----------------|
| Identification code               | d19208_a                                                           |                 |
| Empirical formula                 | C <sub>34</sub> H <sub>13</sub> B Cl <sub>6</sub> N <sub>6</sub> O |                 |
| Formula weight                    | 745.01                                                             |                 |
| Temperature                       | 150(2) K                                                           |                 |
| Wavelength                        | 0.71073 Å                                                          |                 |
| Crystal system                    | Monoclinic                                                         |                 |
| Space group                       | P2 <sub>1</sub> /c                                                 |                 |
| Unit cell dimensions              | a = 10.4119(4) Å                                                   | α = 90°.        |
|                                   | b = 22.7476(9) Å                                                   | β = 98.274(1)°. |
|                                   | c = 13.0866(5) Å                                                   | γ = 90°.        |
| Volume                            | 3067.2(2) Å <sup>3</sup>                                           |                 |
| Z                                 | 4                                                                  |                 |
| Density (calculated)              | 1.613 Mg/m <sup>3</sup>                                            |                 |
| Absorption coefficient            | 0.603 mm <sup>-1</sup>                                             |                 |
| F(000)                            | 1496                                                               |                 |
| Crystal size                      | 0.230 x 0.170 x 0.110 mm <sup>3</sup>                              |                 |
| Theta range for data collection   | 1.790 to 27.548°.                                                  |                 |
| Index ranges                      | -13<=h<=11, -29<=k<=29, -17<=l<=15                                 |                 |
| Reflections collected             | 46522                                                              |                 |
| Independent reflections           | 7066 [R(int) = 0.0483]                                             |                 |
| Completeness to theta = 25.242°   | 100.0 %                                                            |                 |
| Absorption correction             | Semi-empirical from equivalents                                    |                 |
| Max. and min. transmission        | 0.7456 and 0.7207                                                  |                 |
| Refinement method                 | Full-matrix least-squares on F <sup>2</sup>                        |                 |
| Data / restraints / parameters    | 7066 / 0 / 433                                                     |                 |
| Goodness-of-fit on F <sup>2</sup> | 1.039                                                              |                 |
| Final R indices [I>2sigma(I)]     | R1 = 0.0380, wR2 = 0.0809                                          |                 |
| R indices (all data)              | R1 = 0.0666, wR2 = 0.0934                                          |                 |
| Extinction coefficient            | n/a                                                                |                 |
| Largest diff. peak and hole       | 0.504 and -0.374 e.Å <sup>-3</sup>                                 |                 |

Table S 68. Atomic coordinates ( $\times 10^4$ ) and equivalent isotropic displacement parameters ( $\text{\AA}^2 \times 10^3$ ) for **NaphO-Cl<sub>6</sub>BsubPc (Dichlorobenzene:Dimethoxybenzene:Heptane; CCDC deposit 2087102)**.  $U(\text{eq})$  is defined as one third of the trace of the orthogonalized  $U^{ij}$  tensor.

|       | x        | y       | z        | U(eq) |
|-------|----------|---------|----------|-------|
| Cl(1) | 13883(1) | 4561(1) | 6104(1)  | 33(1) |
| Cl(2) | 14019(1) | 3320(1) | 7174(1)  | 36(1) |
| Cl(3) | 9330(1)  | 123(1)  | 3449(1)  | 37(1) |
| Cl(4) | 7502(1)  | 342(1)  | 1354(1)  | 33(1) |
| Cl(5) | 5750(1)  | 4636(1) | -1292(1) | 32(1) |
| Cl(6) | 7249(1)  | 5665(1) | -3(1)    | 37(1) |
| O(1)  | 6133(1)  | 3410(1) | 4699(1)  | 26(1) |
| N(1)  | 8460(2)  | 3452(1) | 4724(1)  | 20(1) |
| N(2)  | 9065(2)  | 2461(1) | 5138(1)  | 23(1) |
| N(3)  | 7333(2)  | 2673(1) | 3785(1)  | 20(1) |
| N(4)  | 6496(2)  | 2840(1) | 2012(1)  | 22(1) |
| N(5)  | 7142(2)  | 3637(1) | 3135(1)  | 21(1) |
| N(6)  | 8684(2)  | 4349(1) | 3831(1)  | 22(1) |
| C(1)  | 9094(2)  | 3964(1) | 4586(2)  | 21(1) |
| C(2)  | 10344(2) | 3921(1) | 5237(2)  | 21(1) |
| C(3)  | 11404(2) | 4299(1) | 5370(2)  | 23(1) |
| C(4)  | 12534(2) | 4106(1) | 5958(2)  | 24(1) |
| C(5)  | 12614(2) | 3545(1) | 6411(2)  | 24(1) |
| C(6)  | 11582(2) | 3158(1) | 6251(2)  | 24(1) |
| C(7)  | 10437(2) | 3351(1) | 5663(2)  | 22(1) |
| C(8)  | 9256(2)  | 3040(1) | 5255(2)  | 22(1) |
| C(9)  | 8164(2)  | 2291(1) | 4351(2)  | 22(1) |
| C(10) | 8127(2)  | 1756(1) | 3758(2)  | 23(1) |
| C(11) | 8777(2)  | 1225(1) | 3951(2)  | 25(1) |
| C(12) | 8596(2)  | 799(1)  | 3200(2)  | 25(1) |
| C(13) | 7802(2)  | 903(1)  | 2248(2)  | 24(1) |
| C(14) | 7191(2)  | 1435(1) | 2034(2)  | 22(1) |
| C(15) | 7345(2)  | 1866(1) | 2792(2)  | 22(1) |
| C(16) | 6920(2)  | 2476(1) | 2805(2)  | 21(1) |
| C(17) | 6657(2)  | 3417(1) | 2184(2)  | 22(1) |

|       |         |         |         |       |
|-------|---------|---------|---------|-------|
| C(18) | 6694(2) | 3912(1) | 1473(2) | 22(1) |
| C(19) | 6229(2) | 3988(1) | 430(2)  | 24(1) |
| C(20) | 6409(2) | 4527(1) | -18(2)  | 26(1) |
| C(21) | 7074(2) | 4987(1) | 554(2)  | 26(1) |
| C(22) | 7562(2) | 4912(1) | 1586(2) | 25(1) |
| C(23) | 7361(2) | 4378(1) | 2045(2) | 23(1) |
| C(24) | 7737(2) | 4166(1) | 3093(2) | 22(1) |
| C(25) | 4883(2) | 3230(1) | 4330(2) | 25(1) |
| C(26) | 4447(2) | 2694(1) | 4714(2) | 31(1) |
| C(27) | 3206(2) | 2509(1) | 4409(2) | 34(1) |
| C(28) | 2348(2) | 2845(1) | 3709(2) | 29(1) |
| C(29) | 1040(2) | 2660(1) | 3363(2) | 39(1) |
| C(30) | 241(2)  | 2992(1) | 2690(2) | 42(1) |
| C(31) | 676(3)  | 3525(1) | 2320(2) | 45(1) |
| C(32) | 1916(3) | 3716(1) | 2634(2) | 40(1) |
| C(33) | 2773(2) | 3380(1) | 3329(2) | 27(1) |
| C(34) | 4082(2) | 3567(1) | 3668(2) | 28(1) |
| B(1)  | 7171(2) | 3297(1) | 4116(2) | 22(1) |

---

Table S 69. Bond lengths [ $\text{\AA}$ ] and angles [ $^\circ$ ] for **NaphO-Cl<sub>6</sub>BsubPc**  
**(Dichlorobenzene:Dimethoxybenzene:Heptane; CCDC deposit 2087102).**

---

|             |          |
|-------------|----------|
| Cl(1)-C(4)  | 1.732(2) |
| Cl(2)-C(5)  | 1.726(2) |
| Cl(3)-C(12) | 1.727(2) |
| Cl(4)-C(13) | 1.728(2) |
| Cl(5)-C(20) | 1.727(2) |
| Cl(6)-C(21) | 1.727(2) |
| O(1)-C(25)  | 1.383(3) |
| O(1)-B(1)   | 1.434(3) |
| N(1)-C(1)   | 1.364(3) |
| N(1)-C(8)   | 1.372(3) |
| N(1)-B(1)   | 1.500(3) |
| N(2)-C(8)   | 1.337(3) |
| N(2)-C(9)   | 1.346(3) |
| N(3)-C(9)   | 1.367(3) |
| N(3)-C(16)  | 1.368(3) |
| N(3)-B(1)   | 1.501(3) |
| N(4)-C(17)  | 1.338(3) |
| N(4)-C(16)  | 1.352(3) |
| N(5)-C(24)  | 1.359(3) |
| N(5)-C(17)  | 1.368(3) |
| N(5)-B(1)   | 1.494(3) |
| N(6)-C(1)   | 1.343(3) |
| N(6)-C(24)  | 1.344(3) |
| C(1)-C(2)   | 1.453(3) |
| C(2)-C(3)   | 1.390(3) |
| C(2)-C(7)   | 1.409(3) |
| C(3)-C(4)   | 1.381(3) |
| C(3)-H(3A)  | 0.9500   |
| C(4)-C(5)   | 1.404(3) |
| C(5)-C(6)   | 1.382(3) |
| C(6)-C(7)   | 1.394(3) |
| C(6)-H(6A)  | 0.9500   |

|              |          |
|--------------|----------|
| C(7)-C(8)    | 1.452(3) |
| C(9)-C(10)   | 1.442(3) |
| C(10)-C(11)  | 1.389(3) |
| C(10)-C(15)  | 1.424(3) |
| C(11)-C(12)  | 1.373(3) |
| C(11)-H(11A) | 0.9500   |
| C(12)-C(13)  | 1.412(3) |
| C(13)-C(14)  | 1.378(3) |
| C(14)-C(15)  | 1.389(3) |
| C(14)-H(14A) | 0.9500   |
| C(15)-C(16)  | 1.455(3) |
| C(17)-C(18)  | 1.464(3) |
| C(18)-C(19)  | 1.391(3) |
| C(18)-C(23)  | 1.421(3) |
| C(19)-C(20)  | 1.384(3) |
| C(19)-H(19A) | 0.9500   |
| C(20)-C(21)  | 1.409(3) |
| C(21)-C(22)  | 1.384(3) |
| C(22)-C(23)  | 1.384(3) |
| C(22)-H(22A) | 0.9500   |
| C(23)-C(24)  | 1.454(3) |
| C(25)-C(34)  | 1.350(3) |
| C(25)-C(26)  | 1.418(3) |
| C(26)-C(27)  | 1.362(3) |
| C(26)-H(26A) | 0.9500   |
| C(27)-C(28)  | 1.409(3) |
| C(27)-H(27A) | 0.9500   |
| C(28)-C(33)  | 1.411(3) |
| C(28)-C(29)  | 1.435(3) |
| C(29)-C(30)  | 1.350(4) |
| C(29)-H(29A) | 0.9500   |
| C(30)-C(31)  | 1.404(4) |
| C(30)-H(30A) | 0.9500   |
| C(31)-C(32)  | 1.369(4) |
| C(31)-H(31A) | 0.9500   |
| C(32)-C(33)  | 1.405(3) |

|                  |            |
|------------------|------------|
| C(32)-H(32A)     | 0.9500     |
| C(33)-C(34)      | 1.436(3)   |
| C(34)-H(34A)     | 0.9500     |
| C(25)-O(1)-B(1)  | 120.26(17) |
| C(1)-N(1)-C(8)   | 112.45(17) |
| C(1)-N(1)-B(1)   | 122.90(18) |
| C(8)-N(1)-B(1)   | 122.52(19) |
| C(8)-N(2)-C(9)   | 116.50(19) |
| C(9)-N(3)-C(16)  | 112.84(18) |
| C(9)-N(3)-B(1)   | 122.26(18) |
| C(16)-N(3)-B(1)  | 123.22(18) |
| C(17)-N(4)-C(16) | 116.97(18) |
| C(24)-N(5)-C(17) | 113.42(18) |
| C(24)-N(5)-B(1)  | 122.66(18) |
| C(17)-N(5)-B(1)  | 123.48(19) |
| C(1)-N(6)-C(24)  | 116.65(19) |
| N(6)-C(1)-N(1)   | 123.10(18) |
| N(6)-C(1)-C(2)   | 129.7(2)   |
| N(1)-C(1)-C(2)   | 105.93(18) |
| C(3)-C(2)-C(7)   | 120.8(2)   |
| C(3)-C(2)-C(1)   | 131.3(2)   |
| C(7)-C(2)-C(1)   | 107.38(18) |
| C(4)-C(3)-C(2)   | 118.1(2)   |
| C(4)-C(3)-H(3A)  | 121.0      |
| C(2)-C(3)-H(3A)  | 121.0      |
| C(3)-C(4)-C(5)   | 121.2(2)   |
| C(3)-C(4)-Cl(1)  | 118.94(18) |
| C(5)-C(4)-Cl(1)  | 119.88(16) |
| C(6)-C(5)-C(4)   | 121.2(2)   |
| C(6)-C(5)-Cl(2)  | 118.24(18) |
| C(4)-C(5)-Cl(2)  | 120.55(17) |
| C(5)-C(6)-C(7)   | 117.9(2)   |
| C(5)-C(6)-H(6A)  | 121.1      |
| C(7)-C(6)-H(6A)  | 121.1      |
| C(6)-C(7)-C(2)   | 120.8(2)   |

|                    |            |
|--------------------|------------|
| C(6)-C(7)-C(8)     | 131.4(2)   |
| C(2)-C(7)-C(8)     | 107.25(18) |
| N(2)-C(8)-N(1)     | 123.08(19) |
| N(2)-C(8)-C(7)     | 128.7(2)   |
| N(1)-C(8)-C(7)     | 105.75(19) |
| N(2)-C(9)-N(3)     | 123.3(2)   |
| N(2)-C(9)-C(10)    | 128.0(2)   |
| N(3)-C(9)-C(10)    | 106.23(18) |
| C(11)-C(10)-C(15)  | 121.1(2)   |
| C(11)-C(10)-C(9)   | 131.5(2)   |
| C(15)-C(10)-C(9)   | 107.19(19) |
| C(12)-C(11)-C(10)  | 118.0(2)   |
| C(12)-C(11)-H(11A) | 121.0      |
| C(10)-C(11)-H(11A) | 121.0      |
| C(11)-C(12)-C(13)  | 121.1(2)   |
| C(11)-C(12)-Cl(3)  | 118.74(18) |
| C(13)-C(12)-Cl(3)  | 120.11(18) |
| C(14)-C(13)-C(12)  | 121.4(2)   |
| C(14)-C(13)-Cl(4)  | 118.50(17) |
| C(12)-C(13)-Cl(4)  | 120.02(18) |
| C(13)-C(14)-C(15)  | 118.2(2)   |
| C(13)-C(14)-H(14A) | 120.9      |
| C(15)-C(14)-H(14A) | 120.9      |
| C(14)-C(15)-C(10)  | 120.1(2)   |
| C(14)-C(15)-C(16)  | 132.6(2)   |
| C(10)-C(15)-C(16)  | 107.12(18) |
| N(4)-C(16)-N(3)    | 122.8(2)   |
| N(4)-C(16)-C(15)   | 129.91(19) |
| N(3)-C(16)-C(15)   | 105.58(18) |
| N(4)-C(17)-N(5)    | 122.1(2)   |
| N(4)-C(17)-C(18)   | 131.4(2)   |
| N(5)-C(17)-C(18)   | 104.92(18) |
| C(19)-C(18)-C(23)  | 119.9(2)   |
| C(19)-C(18)-C(17)  | 132.9(2)   |
| C(23)-C(18)-C(17)  | 107.16(18) |
| C(20)-C(19)-C(18)  | 118.4(2)   |



|                    |            |
|--------------------|------------|
| C(20)-C(19)-H(19A) | 120.8      |
| C(18)-C(19)-H(19A) | 120.8      |
| C(19)-C(20)-C(21)  | 121.3(2)   |
| C(19)-C(20)-Cl(5)  | 118.53(18) |
| C(21)-C(20)-Cl(5)  | 120.13(18) |
| C(22)-C(21)-C(20)  | 120.7(2)   |
| C(22)-C(21)-Cl(6)  | 118.36(18) |
| C(20)-C(21)-Cl(6)  | 120.89(18) |
| C(23)-C(22)-C(21)  | 118.3(2)   |
| C(23)-C(22)-H(22A) | 120.9      |
| C(21)-C(22)-H(22A) | 120.9      |
| C(22)-C(23)-C(18)  | 121.3(2)   |
| C(22)-C(23)-C(24)  | 131.6(2)   |
| C(18)-C(23)-C(24)  | 107.04(19) |
| N(6)-C(24)-N(5)    | 122.5(2)   |
| N(6)-C(24)-C(23)   | 130.2(2)   |
| N(5)-C(24)-C(23)   | 105.68(18) |
| C(34)-C(25)-O(1)   | 121.3(2)   |
| C(34)-C(25)-C(26)  | 121.0(2)   |
| O(1)-C(25)-C(26)   | 117.6(2)   |
| C(27)-C(26)-C(25)  | 120.0(2)   |
| C(27)-C(26)-H(26A) | 120.0      |
| C(25)-C(26)-H(26A) | 120.0      |
| C(26)-C(27)-C(28)  | 120.6(2)   |
| C(26)-C(27)-H(27A) | 119.7      |
| C(28)-C(27)-H(27A) | 119.7      |
| C(27)-C(28)-C(33)  | 119.7(2)   |
| C(27)-C(28)-C(29)  | 122.1(2)   |
| C(33)-C(28)-C(29)  | 118.2(2)   |
| C(30)-C(29)-C(28)  | 120.7(3)   |
| C(30)-C(29)-H(29A) | 119.6      |
| C(28)-C(29)-H(29A) | 119.6      |
| C(29)-C(30)-C(31)  | 120.5(2)   |
| C(29)-C(30)-H(30A) | 119.7      |
| C(31)-C(30)-H(30A) | 119.7      |
| C(32)-C(31)-C(30)  | 120.5(3)   |

|                    |            |
|--------------------|------------|
| C(32)-C(31)-H(31A) | 119.7      |
| C(30)-C(31)-H(31A) | 119.7      |
| C(31)-C(32)-C(33)  | 120.3(3)   |
| C(31)-C(32)-H(32A) | 119.8      |
| C(33)-C(32)-H(32A) | 119.8      |
| C(32)-C(33)-C(28)  | 119.8(2)   |
| C(32)-C(33)-C(34)  | 121.7(2)   |
| C(28)-C(33)-C(34)  | 118.5(2)   |
| C(25)-C(34)-C(33)  | 120.1(2)   |
| C(25)-C(34)-H(34A) | 120.0      |
| C(33)-C(34)-H(34A) | 120.0      |
| O(1)-B(1)-N(5)     | 116.21(19) |
| O(1)-B(1)-N(1)     | 111.15(18) |
| N(5)-B(1)-N(1)     | 103.92(18) |
| O(1)-B(1)-N(3)     | 116.6(2)   |
| N(5)-B(1)-N(3)     | 103.31(18) |
| N(1)-B(1)-N(3)     | 104.21(18) |

---

Symmetry transformations used to generate equivalent atoms:

Table S 70. Anisotropic displacement parameters ( $\text{\AA}^2 \times 10^3$ ) for **NaphO-Cl<sub>6</sub>BsubPc** (**Dichlorobenzene:Dimethoxybenzene:Heptane; CCDC deposit 2087102**). The anisotropic displacement factor exponent takes the form:  $-2\pi^2 [ h^2 a^{*2} U^{11} + \dots + 2 h k a^* b^* U^{12} ]$

|       | U <sup>11</sup> | U <sup>22</sup> | U <sup>33</sup> | U <sup>23</sup> | U <sup>13</sup> | U <sup>12</sup> |
|-------|-----------------|-----------------|-----------------|-----------------|-----------------|-----------------|
| Cl(1) | 21(1)           | 38(1)           | 37(1)           | -4(1)           | -2(1)           | -9(1)           |
| Cl(2) | 19(1)           | 49(1)           | 35(1)           | 6(1)            | -9(1)           | -3(1)           |
| Cl(3) | 28(1)           | 31(1)           | 51(1)           | 2(1)            | -2(1)           | 4(1)            |
| Cl(4) | 40(1)           | 30(1)           | 30(1)           | -6(1)           | 9(1)            | 0(1)            |
| Cl(5) | 28(1)           | 47(1)           | 21(1)           | 3(1)            | 3(1)            | 12(1)           |
| Cl(6) | 40(1)           | 35(1)           | 38(1)           | 9(1)            | 7(1)            | 5(1)            |
| O(1)  | 15(1)           | 44(1)           | 20(1)           | -10(1)          | 1(1)            | -1(1)           |
| N(1)  | 16(1)           | 29(1)           | 16(1)           | -4(1)           | 2(1)            | -1(1)           |
| N(2)  | 19(1)           | 31(1)           | 18(1)           | 1(1)            | 0(1)            | -5(1)           |
| N(3)  | 15(1)           | 29(1)           | 16(1)           | -2(1)           | 1(1)            | -2(1)           |
| N(4)  | 16(1)           | 29(1)           | 20(1)           | -3(1)           | 0(1)            | 0(1)            |
| N(5)  | 18(1)           | 26(1)           | 18(1)           | -5(1)           | -1(1)           | 2(1)            |
| N(6)  | 19(1)           | 27(1)           | 20(1)           | -6(1)           | 0(1)            | 2(1)            |
| C(1)  | 17(1)           | 26(1)           | 20(1)           | -8(1)           | 3(1)            | 0(1)            |
| C(2)  | 17(1)           | 28(1)           | 17(1)           | -7(1)           | 1(1)            | 0(1)            |
| C(3)  | 23(1)           | 27(1)           | 19(1)           | -6(1)           | 1(1)            | -2(1)           |
| C(4)  | 18(1)           | 32(1)           | 21(1)           | -7(1)           | 2(1)            | -5(1)           |
| C(5)  | 17(1)           | 37(1)           | 19(1)           | -2(1)           | -1(1)           | 0(1)            |
| C(6)  | 21(1)           | 31(1)           | 20(1)           | 0(1)            | 2(1)            | -1(1)           |
| C(7)  | 18(1)           | 31(1)           | 15(1)           | -4(1)           | 2(1)            | -2(1)           |
| C(8)  | 17(1)           | 34(1)           | 15(1)           | -2(1)           | 1(1)            | -2(1)           |
| C(9)  | 17(1)           | 28(1)           | 19(1)           | 1(1)            | 3(1)            | -4(1)           |
| C(10) | 16(1)           | 30(1)           | 21(1)           | 1(1)            | 2(1)            | -6(1)           |
| C(11) | 18(1)           | 31(1)           | 25(1)           | 5(1)            | -1(1)           | -6(1)           |
| C(12) | 17(1)           | 26(1)           | 33(1)           | 4(1)            | 6(1)            | -2(1)           |
| C(13) | 22(1)           | 27(1)           | 26(1)           | -2(1)           | 9(1)            | -3(1)           |
| C(14) | 18(1)           | 30(1)           | 19(1)           | -1(1)           | 4(1)            | -4(1)           |
| C(15) | 15(1)           | 28(1)           | 22(1)           | 1(1)            | 4(1)            | -3(1)           |
| C(16) | 13(1)           | 31(1)           | 18(1)           | -5(1)           | 0(1)            | -4(1)           |
| C(17) | 14(1)           | 30(1)           | 20(1)           | -6(1)           | 0(1)            | 1(1)            |

|       |       |       |       |        |       |       |
|-------|-------|-------|-------|--------|-------|-------|
| C(18) | 16(1) | 28(1) | 22(1) | -2(1)  | 1(1)  | 6(1)  |
| C(19) | 18(1) | 32(1) | 21(1) | -5(1)  | 1(1)  | 6(1)  |
| C(20) | 18(1) | 37(1) | 21(1) | -1(1)  | 3(1)  | 10(1) |
| C(21) | 21(1) | 30(1) | 28(1) | 2(1)   | 8(1)  | 7(1)  |
| C(22) | 18(1) | 28(1) | 28(1) | -3(1)  | 2(1)  | 4(1)  |
| C(23) | 16(1) | 28(1) | 24(1) | -3(1)  | 2(1)  | 4(1)  |
| C(24) | 18(1) | 26(1) | 23(1) | -5(1)  | 3(1)  | 4(1)  |
| C(25) | 17(1) | 39(1) | 19(1) | -10(1) | 2(1)  | 1(1)  |
| C(26) | 26(1) | 39(1) | 27(1) | 0(1)   | 3(1)  | 3(1)  |
| C(27) | 36(1) | 34(1) | 33(1) | 0(1)   | 9(1)  | -5(1) |
| C(28) | 26(1) | 38(1) | 24(1) | -8(1)  | 8(1)  | -1(1) |
| C(29) | 28(1) | 56(2) | 36(2) | -14(1) | 14(1) | -8(1) |
| C(30) | 18(1) | 73(2) | 36(2) | -24(1) | 4(1)  | -3(1) |
| C(31) | 27(1) | 68(2) | 36(2) | -10(1) | -5(1) | 15(1) |
| C(32) | 32(1) | 44(2) | 40(2) | 4(1)   | -1(1) | 7(1)  |
| C(33) | 24(1) | 36(1) | 22(1) | -6(1)  | 4(1)  | 4(1)  |
| C(34) | 27(1) | 33(1) | 26(1) | -2(1)  | 4(1)  | -1(1) |
| B(1)  | 16(1) | 32(1) | 19(1) | -6(1)  | -1(1) | -1(1) |

---

Table S 71. Hydrogen coordinates ( $\times 10^4$ ) and isotropic displacement parameters ( $\text{\AA}^2 \times 10^{-3}$ ) for **NaphO-Cl<sub>6</sub>BsubPc (Dichlorobenzene:Dimethoxybenzene:Heptane; CCDC deposit 2087102)**.

|        | x     | y    | z    | U(eq) |
|--------|-------|------|------|-------|
| H(3A)  | 11353 | 4679 | 5066 | 27    |
| H(6A)  | 11651 | 2773 | 6534 | 29    |
| H(11A) | 9331  | 1158 | 4583 | 30    |
| H(14A) | 6677  | 1505 | 1384 | 27    |
| H(19A) | 5798  | 3676 | 35   | 29    |
| H(22A) | 8023  | 5220 | 1970 | 30    |
| H(26A) | 5020  | 2464 | 5185 | 37    |
| H(27A) | 2918  | 2150 | 4671 | 41    |
| H(29A) | 732   | 2302 | 3609 | 47    |
| H(30A) | -621  | 2863 | 2465 | 51    |
| H(31A) | 104   | 3754 | 1847 | 54    |
| H(32A) | 2199  | 4078 | 2381 | 47    |
| H(34A) | 4386  | 3928 | 3427 | 34    |

Table S 72. Torsion angles [°] for **NaphO-Cl<sub>6</sub>BsubPc (Dichlorobenzene:Dimethoxybenzene:Heptane; CCDC deposit 2087102)**.

---

|                       |             |
|-----------------------|-------------|
| C(24)-N(6)-C(1)-N(1)  | -11.3(3)    |
| C(24)-N(6)-C(1)-C(2)  | 153.7(2)    |
| C(8)-N(1)-C(1)-N(6)   | 157.3(2)    |
| B(1)-N(1)-C(1)-N(6)   | -6.4(3)     |
| C(8)-N(1)-C(1)-C(2)   | -10.8(2)    |
| B(1)-N(1)-C(1)-C(2)   | -174.54(19) |
| N(6)-C(1)-C(2)-C(3)   | 9.7(4)      |
| N(1)-C(1)-C(2)-C(3)   | 176.7(2)    |
| N(6)-C(1)-C(2)-C(7)   | -161.6(2)   |
| N(1)-C(1)-C(2)-C(7)   | 5.5(2)      |
| C(7)-C(2)-C(3)-C(4)   | -2.0(3)     |
| C(1)-C(2)-C(3)-C(4)   | -172.3(2)   |
| C(2)-C(3)-C(4)-C(5)   | -0.1(3)     |
| C(2)-C(3)-C(4)-Cl(1)  | 178.14(16)  |
| C(3)-C(4)-C(5)-C(6)   | 2.6(3)      |
| Cl(1)-C(4)-C(5)-C(6)  | -175.68(17) |
| C(3)-C(4)-C(5)-Cl(2)  | -178.06(17) |
| Cl(1)-C(4)-C(5)-Cl(2) | 3.7(3)      |
| C(4)-C(5)-C(6)-C(7)   | -2.8(3)     |
| Cl(2)-C(5)-C(6)-C(7)  | 177.86(17)  |
| C(5)-C(6)-C(7)-C(2)   | 0.6(3)      |
| C(5)-C(6)-C(7)-C(8)   | 171.5(2)    |
| C(3)-C(2)-C(7)-C(6)   | 1.7(3)      |
| C(1)-C(2)-C(7)-C(6)   | 174.1(2)    |
| C(3)-C(2)-C(7)-C(8)   | -171.11(19) |
| C(1)-C(2)-C(7)-C(8)   | 1.3(2)      |
| C(9)-N(2)-C(8)-N(1)   | 10.1(3)     |
| C(9)-N(2)-C(8)-C(7)   | -149.6(2)   |
| C(1)-N(1)-C(8)-N(2)   | -152.1(2)   |
| B(1)-N(1)-C(8)-N(2)   | 11.7(3)     |
| C(1)-N(1)-C(8)-C(7)   | 11.5(2)     |
| B(1)-N(1)-C(8)-C(7)   | 175.38(19)  |

|                         |             |
|-------------------------|-------------|
| C(6)-C(7)-C(8)-N(2)     | -16.9(4)    |
| C(2)-C(7)-C(8)-N(2)     | 154.9(2)    |
| C(6)-C(7)-C(8)-N(1)     | -179.3(2)   |
| C(2)-C(7)-C(8)-N(1)     | -7.5(2)     |
| C(8)-N(2)-C(9)-N(3)     | -9.8(3)     |
| C(8)-N(2)-C(9)-C(10)    | 150.0(2)    |
| C(16)-N(3)-C(9)-N(2)    | 153.4(2)    |
| B(1)-N(3)-C(9)-N(2)     | -12.3(3)    |
| C(16)-N(3)-C(9)-C(10)   | -10.2(2)    |
| B(1)-N(3)-C(9)-C(10)    | -175.85(18) |
| N(2)-C(9)-C(10)-C(11)   | 17.0(4)     |
| N(3)-C(9)-C(10)-C(11)   | 179.5(2)    |
| N(2)-C(9)-C(10)-C(15)   | -157.0(2)   |
| N(3)-C(9)-C(10)-C(15)   | 5.5(2)      |
| C(15)-C(10)-C(11)-C(12) | -2.9(3)     |
| C(9)-C(10)-C(11)-C(12)  | -176.2(2)   |
| C(10)-C(11)-C(12)-C(13) | 1.7(3)      |
| C(10)-C(11)-C(12)-Cl(3) | -176.79(17) |
| C(11)-C(12)-C(13)-C(14) | 0.6(3)      |
| Cl(3)-C(12)-C(13)-C(14) | 179.12(17)  |
| C(11)-C(12)-C(13)-Cl(4) | -175.53(17) |
| Cl(3)-C(12)-C(13)-Cl(4) | 3.0(3)      |
| C(12)-C(13)-C(14)-C(15) | -1.8(3)     |
| Cl(4)-C(13)-C(14)-C(15) | 174.44(16)  |
| C(13)-C(14)-C(15)-C(10) | 0.6(3)      |
| C(13)-C(14)-C(15)-C(16) | 175.4(2)    |
| C(11)-C(10)-C(15)-C(14) | 1.8(3)      |
| C(9)-C(10)-C(15)-C(14)  | 176.55(19)  |
| C(11)-C(10)-C(15)-C(16) | -174.2(2)   |
| C(9)-C(10)-C(15)-C(16)  | 0.6(2)      |
| C(17)-N(4)-C(16)-N(3)   | 8.9(3)      |
| C(17)-N(4)-C(16)-C(15)  | -153.9(2)   |
| C(9)-N(3)-C(16)-N(4)    | -155.9(2)   |
| B(1)-N(3)-C(16)-N(4)    | 9.6(3)      |
| C(9)-N(3)-C(16)-C(15)   | 10.5(2)     |
| B(1)-N(3)-C(16)-C(15)   | 175.97(18)  |

|                         |             |
|-------------------------|-------------|
| C(14)-C(15)-C(16)-N(4)  | -16.6(4)    |
| C(10)-C(15)-C(16)-N(4)  | 158.7(2)    |
| C(14)-C(15)-C(16)-N(3)  | 178.3(2)    |
| C(10)-C(15)-C(16)-N(3)  | -6.4(2)     |
| C(16)-N(4)-C(17)-N(5)   | -4.5(3)     |
| C(16)-N(4)-C(17)-C(18)  | 158.8(2)    |
| C(24)-N(5)-C(17)-N(4)   | 153.8(2)    |
| B(1)-N(5)-C(17)-N(4)    | -18.7(3)    |
| C(24)-N(5)-C(17)-C(18)  | -13.3(2)    |
| B(1)-N(5)-C(17)-C(18)   | 174.19(18)  |
| N(4)-C(17)-C(18)-C(19)  | 21.6(4)     |
| N(5)-C(17)-C(18)-C(19)  | -172.9(2)   |
| N(4)-C(17)-C(18)-C(23)  | -158.3(2)   |
| N(5)-C(17)-C(18)-C(23)  | 7.2(2)      |
| C(23)-C(18)-C(19)-C(20) | -1.3(3)     |
| C(17)-C(18)-C(19)-C(20) | 178.8(2)    |
| C(18)-C(19)-C(20)-C(21) | 1.6(3)      |
| C(18)-C(19)-C(20)-Cl(5) | -176.33(16) |
| C(19)-C(20)-C(21)-C(22) | -0.4(3)     |
| Cl(5)-C(20)-C(21)-C(22) | 177.47(17)  |
| C(19)-C(20)-C(21)-Cl(6) | -178.02(16) |
| Cl(5)-C(20)-C(21)-Cl(6) | -0.1(3)     |
| C(20)-C(21)-C(22)-C(23) | -1.0(3)     |
| Cl(6)-C(21)-C(22)-C(23) | 176.65(16)  |
| C(21)-C(22)-C(23)-C(18) | 1.2(3)      |
| C(21)-C(22)-C(23)-C(24) | -179.8(2)   |
| C(19)-C(18)-C(23)-C(22) | -0.1(3)     |
| C(17)-C(18)-C(23)-C(22) | 179.83(19)  |
| C(19)-C(18)-C(23)-C(24) | -179.25(19) |
| C(17)-C(18)-C(23)-C(24) | 0.7(2)      |
| C(1)-N(6)-C(24)-N(5)    | 5.0(3)      |
| C(1)-N(6)-C(24)-C(23)   | -158.5(2)   |
| C(17)-N(5)-C(24)-N(6)   | -153.2(2)   |
| B(1)-N(5)-C(24)-N(6)    | 19.4(3)     |
| C(17)-N(5)-C(24)-C(23)  | 13.8(2)     |
| B(1)-N(5)-C(24)-C(23)   | -173.62(18) |



|                         |             |
|-------------------------|-------------|
| C(22)-C(23)-C(24)-N(6)  | -21.8(4)    |
| C(18)-C(23)-C(24)-N(6)  | 157.3(2)    |
| C(22)-C(23)-C(24)-N(5)  | 172.6(2)    |
| C(18)-C(23)-C(24)-N(5)  | -8.3(2)     |
| B(1)-O(1)-C(25)-C(34)   | -85.5(3)    |
| B(1)-O(1)-C(25)-C(26)   | 98.0(3)     |
| C(34)-C(25)-C(26)-C(27) | 0.7(4)      |
| O(1)-C(25)-C(26)-C(27)  | 177.2(2)    |
| C(25)-C(26)-C(27)-C(28) | 0.2(4)      |
| C(26)-C(27)-C(28)-C(33) | -0.7(4)     |
| C(26)-C(27)-C(28)-C(29) | 179.3(2)    |
| C(27)-C(28)-C(29)-C(30) | -179.9(2)   |
| C(33)-C(28)-C(29)-C(30) | 0.1(4)      |
| C(28)-C(29)-C(30)-C(31) | -0.3(4)     |
| C(29)-C(30)-C(31)-C(32) | 0.1(4)      |
| C(30)-C(31)-C(32)-C(33) | 0.2(4)      |
| C(31)-C(32)-C(33)-C(28) | -0.4(4)     |
| C(31)-C(32)-C(33)-C(34) | 179.5(2)    |
| C(27)-C(28)-C(33)-C(32) | -179.8(2)   |
| C(29)-C(28)-C(33)-C(32) | 0.2(3)      |
| C(27)-C(28)-C(33)-C(34) | 0.3(3)      |
| C(29)-C(28)-C(33)-C(34) | -179.7(2)   |
| O(1)-C(25)-C(34)-C(33)  | -177.46(19) |
| C(26)-C(25)-C(34)-C(33) | -1.0(3)     |
| C(32)-C(33)-C(34)-C(25) | -179.4(2)   |
| C(28)-C(33)-C(34)-C(25) | 0.5(3)      |
| C(25)-O(1)-B(1)-N(5)    | 69.5(3)     |
| C(25)-O(1)-B(1)-N(1)    | -171.98(19) |
| C(25)-O(1)-B(1)-N(3)    | -52.8(3)    |
| C(24)-N(5)-B(1)-O(1)    | 90.6(2)     |
| C(17)-N(5)-B(1)-O(1)    | -97.6(2)    |
| C(24)-N(5)-B(1)-N(1)    | -31.8(3)    |
| C(17)-N(5)-B(1)-N(1)    | 140.02(19)  |
| C(24)-N(5)-B(1)-N(3)    | -140.36(19) |
| C(17)-N(5)-B(1)-N(3)    | 31.4(3)     |
| C(1)-N(1)-B(1)-O(1)     | -100.2(2)   |

|                      |             |
|----------------------|-------------|
| C(8)-N(1)-B(1)-O(1)  | 97.7(2)     |
| C(1)-N(1)-B(1)-N(5)  | 25.6(3)     |
| C(8)-N(1)-B(1)-N(5)  | -136.60(19) |
| C(1)-N(1)-B(1)-N(3)  | 133.5(2)    |
| C(8)-N(1)-B(1)-N(3)  | -28.7(3)    |
| C(9)-N(3)-B(1)-O(1)  | -94.0(2)    |
| C(16)-N(3)-B(1)-O(1) | 101.8(2)    |
| C(9)-N(3)-B(1)-N(5)  | 137.24(19)  |
| C(16)-N(3)-B(1)-N(5) | -26.9(3)    |
| C(9)-N(3)-B(1)-N(1)  | 28.9(3)     |
| C(16)-N(3)-B(1)-N(1) | -135.26(19) |

---

Symmetry transformations used to generate equivalent atoms:

a)

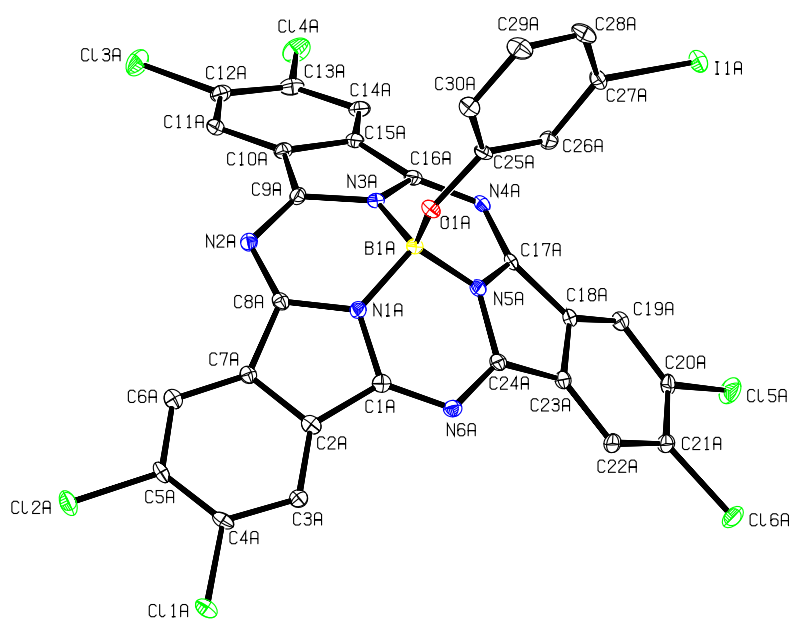

b)

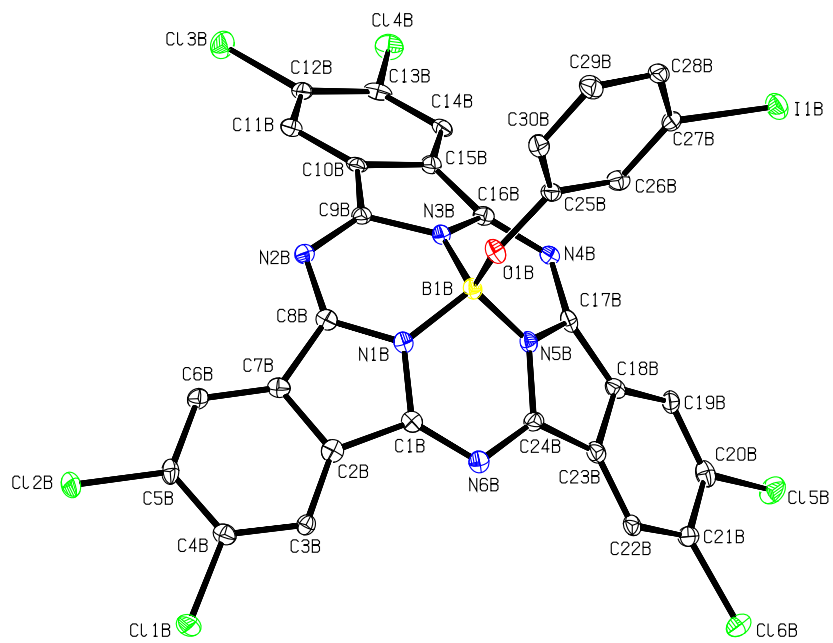

Figure S37: Anisotropic displacement ellipsoid plots of individual co-crystals of *m*-IPhO-Cl<sub>6</sub>BsubPc (Toluene:Heptane; CCDC deposit 2087103).

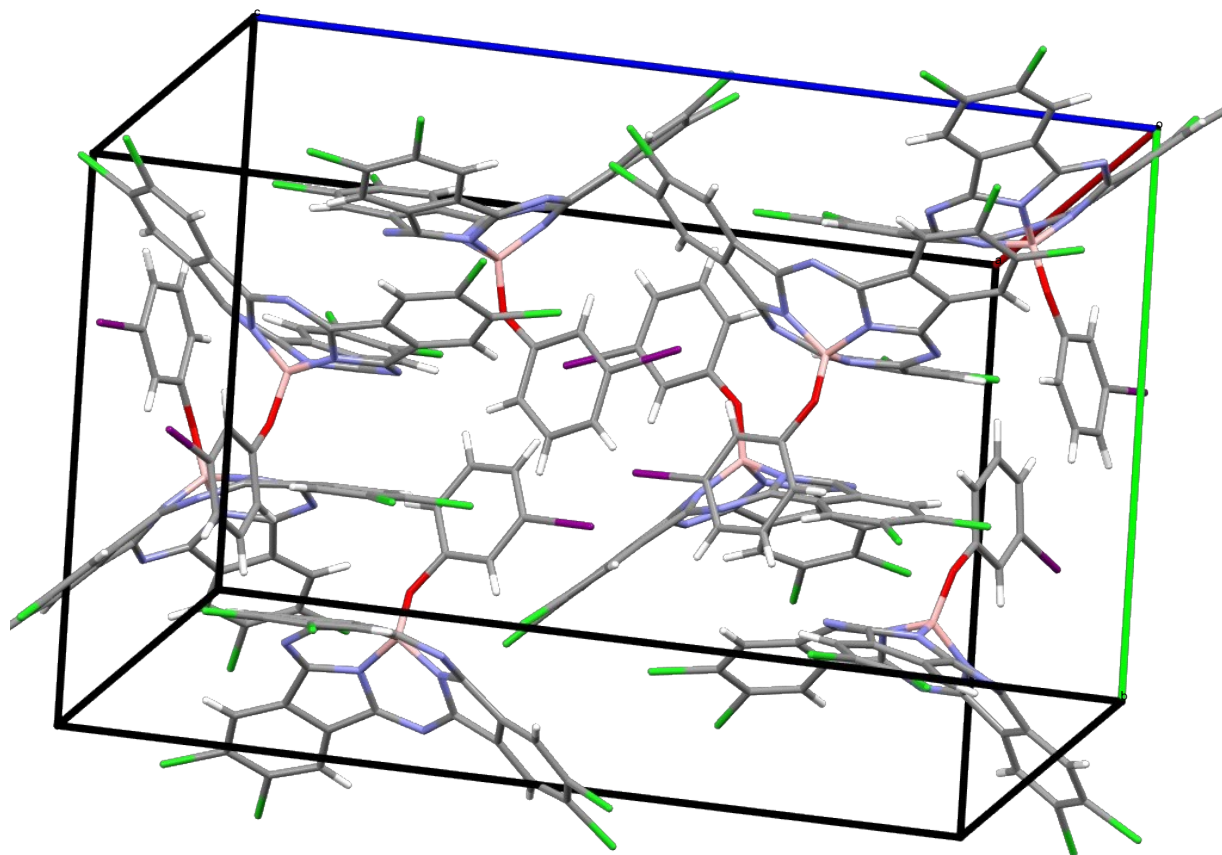

Figure S38: Populated unit cell of *m*-IPhO-Cl<sub>6</sub>BsubPc (Toluene:Heptane; CCDC deposit 2087103).

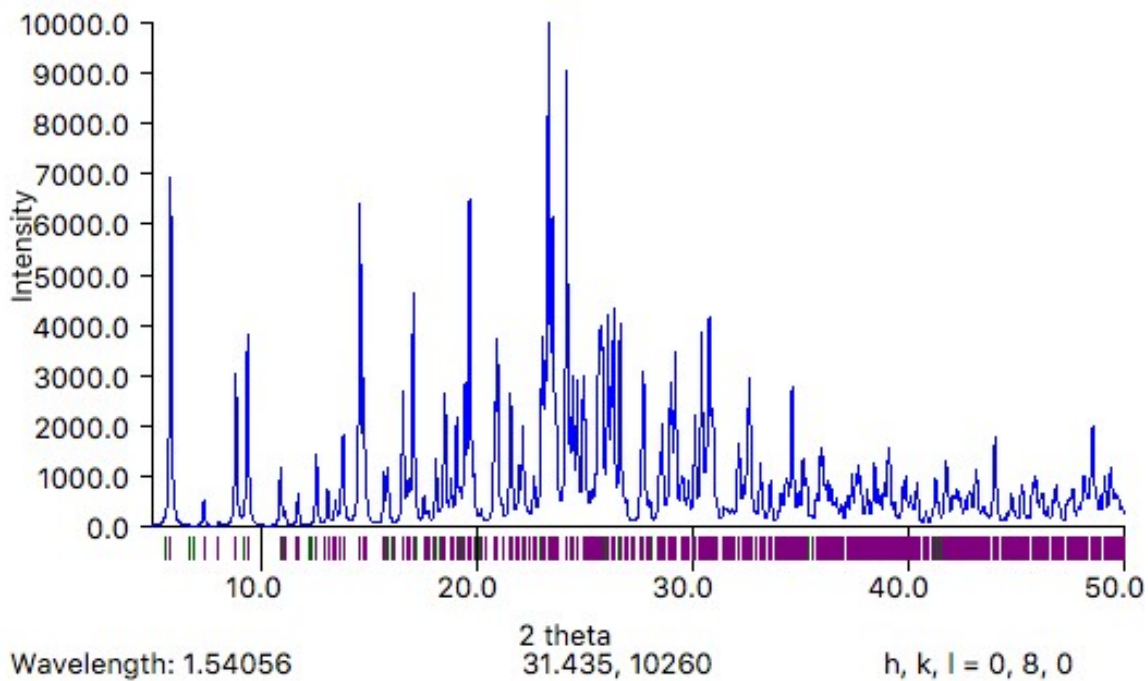

Figure S39: Powder x-ray diffraction of *m*IPhO-Cl<sub>6</sub>BsubPc (Toluene:Heptane; CCDC deposit 2087103).

Table S 73. Crystal data and structure refinement for *m*-IPhO-Cl<sub>6</sub>BsubPc (Toluene:Heptane; CCDC deposit 2087103).

|                                   |                                                                      |          |
|-----------------------------------|----------------------------------------------------------------------|----------|
| Identification code               | d19227a_a                                                            |          |
| Empirical formula                 | C <sub>30</sub> H <sub>10</sub> B Cl <sub>6</sub> I N <sub>6</sub> O |          |
| Formula weight                    | 820.85                                                               |          |
| Temperature                       | 150(2) K                                                             |          |
| Wavelength                        | 0.71073 Å                                                            |          |
| Crystal system                    | Orthorhombic                                                         |          |
| Space group                       | Pca2 <sub>1</sub>                                                    |          |
| Unit cell dimensions              | a = 15.8587(3) Å                                                     | α = 90°. |
|                                   | b = 15.1167(3) Å                                                     | β = 90°. |
|                                   | c = 23.9409(5) Å                                                     | γ = 90°. |
| Volume                            | 5739.4(2) Å <sup>3</sup>                                             |          |
| Z                                 | 8                                                                    |          |
| Density (calculated)              | 1.900 Mg/m <sup>3</sup>                                              |          |
| Absorption coefficient            | 1.715 mm <sup>-1</sup>                                               |          |
| F(000)                            | 3200                                                                 |          |
| Crystal size                      | 0.230 x 0.170 x 0.130 mm <sup>3</sup>                                |          |
| Theta range for data collection   | 1.701 to 27.501°.                                                    |          |
| Index ranges                      | -20 ≤ h ≤ 20, -19 ≤ k ≤ 19, -31 ≤ l ≤ 31                             |          |
| Reflections collected             | 63792                                                                |          |
| Independent reflections           | 13120 [R(int) = 0.0440]                                              |          |
| Completeness to theta = 25.242°   | 99.8 %                                                               |          |
| Absorption correction             | Semi-empirical from equivalents                                      |          |
| Max. and min. transmission        | 0.7456 and 0.6956                                                    |          |
| Refinement method                 | Full-matrix least-squares on F <sup>2</sup>                          |          |
| Data / restraints / parameters    | 13120 / 1 / 811                                                      |          |
| Goodness-of-fit on F <sup>2</sup> | 1.032                                                                |          |
| Final R indices [I > 2σ(I)]       | R1 = 0.0302, wR2 = 0.0751                                            |          |
| R indices (all data)              | R1 = 0.0366, wR2 = 0.0772                                            |          |
| Absolute structure parameter      | -0.008(5)                                                            |          |
| Extinction coefficient            | n/a                                                                  |          |
| Largest diff. peak and hole       | 0.808 and -1.007 e.Å <sup>-3</sup>                                   |          |

Table S 74. Atomic coordinates ( $\times 10^4$ ) and equivalent isotropic displacement parameters ( $\text{\AA}^2 \times 10^3$ ) for *m*-IPhO-Cl<sub>6</sub>BsubPc (Toluene:Heptane; CCDC deposit 2087103). U(eq) is defined as one third of the trace of the orthogonalized U<sup>ij</sup> tensor.

|        | x       | y       | z       | U(eq) |
|--------|---------|---------|---------|-------|
| I(1A)  | 2972(1) | 4048(1) | 4617(1) | 23(1) |
| Cl(1A) | 9256(1) | 20(1)   | 7023(1) | 22(1) |
| Cl(2A) | 8593(1) | 523(1)  | 8208(1) | 28(1) |
| Cl(3A) | 2331(1) | 1580(1) | 8900(1) | 32(1) |
| Cl(4A) | 1065(1) | 1135(1) | 7920(1) | 32(1) |
| Cl(5A) | 2909(1) | -818(1) | 4231(1) | 33(1) |
| Cl(6A) | 4797(1) | -961(1) | 3850(1) | 28(1) |
| O(1A)  | 5368(2) | 3156(2) | 6158(2) | 17(1) |
| N(1A)  | 5819(3) | 1822(3) | 6581(2) | 15(1) |
| N(2A)  | 5314(3) | 2009(3) | 7507(2) | 16(1) |
| N(3A)  | 4390(3) | 2203(3) | 6727(2) | 15(1) |
| N(4A)  | 3397(3) | 1593(3) | 6093(2) | 16(1) |
| N(5A)  | 4842(3) | 1653(3) | 5853(2) | 15(1) |
| N(6A)  | 6209(3) | 1022(3) | 5766(2) | 17(1) |
| C(1A)  | 6370(3) | 1310(3) | 6283(2) | 16(1) |
| C(2A)  | 7009(3) | 1045(3) | 6686(2) | 16(1) |
| C(3A)  | 7765(3) | 595(3)  | 6625(2) | 16(1) |
| C(4A)  | 8257(3) | 469(3)  | 7098(2) | 18(1) |
| C(5A)  | 7971(3) | 720(4)  | 7627(2) | 18(1) |
| C(6A)  | 7197(3) | 1142(3) | 7697(2) | 18(1) |
| C(7A)  | 6736(3) | 1331(3) | 7223(2) | 14(1) |
| C(8A)  | 5926(3) | 1793(3) | 7145(2) | 15(1) |
| C(9A)  | 4547(3) | 2155(3) | 7287(2) | 16(1) |
| C(10A) | 3713(3) | 2020(3) | 7550(2) | 16(1) |
| C(11A) | 3475(3) | 1929(3) | 8104(2) | 19(1) |
| C(12A) | 2640(4) | 1681(3) | 8213(2) | 21(1) |
| C(13A) | 2085(3) | 1509(3) | 7777(3) | 22(1) |
| C(14A) | 2312(3) | 1608(3) | 7224(2) | 20(1) |
| C(15A) | 3137(3) | 1881(3) | 7113(2) | 16(1) |
| C(16A) | 3591(3) | 1934(3) | 6588(2) | 16(1) |

|        |          |         |         |       |
|--------|----------|---------|---------|-------|
| C(17A) | 4035(3)  | 1414(3) | 5746(2) | 15(1) |
| C(18A) | 4070(3)  | 801(3)  | 5276(2) | 17(1) |
| C(19A) | 3446(3)  | 347(3)  | 4998(2) | 21(1) |
| C(20A) | 3678(3)  | -225(3) | 4574(2) | 20(1) |
| C(21A) | 4538(3)  | -323(3) | 4425(2) | 20(1) |
| C(22A) | 5174(3)  | 86(3)   | 4723(2) | 20(1) |
| C(23A) | 4941(3)  | 653(3)  | 5159(2) | 16(1) |
| C(24A) | 5429(3)  | 1150(3) | 5573(2) | 17(1) |
| C(25A) | 4946(3)  | 3789(3) | 5861(2) | 15(1) |
| C(26A) | 4309(3)  | 3602(3) | 5482(2) | 18(1) |
| C(27A) | 3920(3)  | 4313(3) | 5203(2) | 19(1) |
| C(28A) | 4159(3)  | 5171(3) | 5295(2) | 25(1) |
| C(29A) | 4818(4)  | 5340(4) | 5660(3) | 26(1) |
| C(30A) | 5210(3)  | 4657(3) | 5946(2) | 19(1) |
| B(1A)  | 5087(4)  | 2288(4) | 6305(2) | 16(1) |
| I(1B)  | 2030(1)  | 6531(1) | 5151(1) | 31(1) |
| Cl(1B) | -4232(1) | 2503(1) | 2428(1) | 30(1) |
| Cl(2B) | -3400(1) | 3176(1) | 1325(1) | 38(1) |
| Cl(3B) | 2920(1)  | 3903(1) | 1108(1) | 35(1) |
| Cl(4B) | 4051(1)  | 3489(1) | 2156(1) | 32(1) |
| Cl(5B) | 1425(1)  | 1415(1) | 5722(1) | 34(1) |
| Cl(6B) | -529(1)  | 1268(1) | 5877(1) | 29(1) |
| O(1B)  | -403(2)  | 5560(2) | 3646(2) | 24(1) |
| N(1B)  | -897(3)  | 4279(3) | 3183(2) | 19(1) |
| N(2B)  | -224(3)  | 4433(3) | 2300(2) | 20(1) |
| N(3B)  | 571(3)   | 4544(3) | 3144(2) | 19(1) |
| N(4B)  | 1424(3)  | 3865(3) | 3840(2) | 20(1) |
| N(5B)  | -63(3)   | 4014(3) | 3969(2) | 18(1) |
| N(6B)  | -1462(3) | 3443(3) | 3935(2) | 20(1) |
| C(1B)  | -1529(3) | 3793(3) | 3419(2) | 19(1) |
| C(2B)  | -2117(3) | 3591(4) | 2967(2) | 21(1) |
| C(3B)  | -2893(3) | 3170(3) | 2967(2) | 18(1) |
| C(4B)  | -3283(3) | 3046(4) | 2454(2) | 23(1) |
| C(5B)  | -2893(4) | 3318(4) | 1946(2) | 22(1) |
| C(6B)  | -2107(3) | 3722(4) | 1955(2) | 21(1) |
| C(7B)  | -1723(3) | 3872(3) | 2464(2) | 20(1) |



|        |         |         |         |       |
|--------|---------|---------|---------|-------|
| C(8B)  | -912(3) | 4270(3) | 2618(2) | 20(1) |
| C(9B)  | 510(3)  | 4515(3) | 2568(2) | 18(1) |
| C(10B) | 1368(3) | 4360(3) | 2375(2) | 19(1) |
| C(11B) | 1688(4) | 4272(3) | 1833(2) | 22(1) |
| C(12B) | 2509(4) | 4019(3) | 1772(2) | 21(1) |
| C(13B) | 3022(3) | 3836(4) | 2247(3) | 24(1) |
| C(14B) | 2709(3) | 3925(3) | 2779(2) | 19(1) |
| C(15B) | 1879(3) | 4184(3) | 2839(3) | 20(1) |
| C(16B) | 1330(3) | 4238(3) | 3334(2) | 19(1) |
| C(17B) | 718(3)  | 3709(4) | 4140(2) | 20(1) |
| C(18B) | 564(3)  | 3083(3) | 4574(2) | 19(1) |
| C(19B) | 1105(4) | 2581(3) | 4923(2) | 22(1) |
| C(20B) | 761(4)  | 2032(4) | 5301(2) | 25(1) |
| C(21B) | -132(3) | 1943(3) | 5361(2) | 22(1) |
| C(22B) | -656(3) | 2386(3) | 5009(2) | 19(1) |
| C(23B) | -327(3) | 2963(3) | 4621(2) | 21(1) |
| C(24B) | -699(3) | 3512(3) | 4182(2) | 20(1) |
| C(25B) | 85(3)   | 6200(4) | 3902(2) | 21(1) |
| C(26B) | 723(4)  | 6030(3) | 4285(2) | 22(1) |
| C(27B) | 1128(3) | 6747(4) | 4532(2) | 20(1) |
| C(28B) | 928(4)  | 7603(4) | 4396(2) | 24(1) |
| C(29B) | 279(4)  | 7753(4) | 4012(3) | 28(1) |
| C(30B) | -133(4) | 7060(4) | 3773(3) | 28(1) |
| B(1B)  | -187(4) | 4672(4) | 3516(3) | 19(1) |

---

Table S 75. Bond lengths [Å] and angles [°] for *m*-IPhO-Cl<sub>6</sub>BsubPc (Toluene:Heptane; CCDC deposit 2087103).

---

|               |          |
|---------------|----------|
| I(1A)-C(27A)  | 2.094(5) |
| Cl(1A)-C(4A)  | 1.733(5) |
| Cl(2A)-C(5A)  | 1.731(5) |
| Cl(3A)-C(12A) | 1.723(6) |
| Cl(4A)-C(13A) | 1.747(5) |
| Cl(5A)-C(20A) | 1.722(5) |
| Cl(6A)-C(21A) | 1.731(5) |
| O(1A)-C(25A)  | 1.366(6) |
| O(1A)-B(1A)   | 1.430(7) |
| N(1A)-C(8A)   | 1.360(7) |
| N(1A)-C(1A)   | 1.370(6) |
| N(1A)-B(1A)   | 1.510(7) |
| N(2A)-C(8A)   | 1.342(7) |
| N(2A)-C(9A)   | 1.344(7) |
| N(3A)-C(9A)   | 1.366(6) |
| N(3A)-C(16A)  | 1.371(6) |
| N(3A)-B(1A)   | 1.504(7) |
| N(4A)-C(16A)  | 1.330(7) |
| N(4A)-C(17A)  | 1.336(7) |
| N(5A)-C(17A)  | 1.355(6) |
| N(5A)-C(24A)  | 1.377(6) |
| N(5A)-B(1A)   | 1.499(7) |
| N(6A)-C(24A)  | 1.335(7) |
| N(6A)-C(1A)   | 1.335(7) |
| C(1A)-C(2A)   | 1.456(7) |
| C(2A)-C(3A)   | 1.386(7) |
| C(2A)-C(7A)   | 1.424(8) |
| C(3A)-C(4A)   | 1.389(8) |
| C(3A)-H(3AA)  | 0.9300   |
| C(4A)-C(5A)   | 1.398(8) |
| C(5A)-C(6A)   | 1.394(8) |
| C(6A)-C(7A)   | 1.380(7) |

|               |          |
|---------------|----------|
| C(6A)-H(6AA)  | 0.9300   |
| C(7A)-C(8A)   | 1.473(7) |
| C(9A)-C(10A)  | 1.480(7) |
| C(10A)-C(11A) | 1.384(7) |
| C(10A)-C(15A) | 1.406(7) |
| C(11A)-C(12A) | 1.401(8) |
| C(11A)-H(11A) | 0.9300   |
| C(12A)-C(13A) | 1.388(9) |
| C(13A)-C(14A) | 1.382(8) |
| C(14A)-C(15A) | 1.396(7) |
| C(14A)-H(14A) | 0.9300   |
| C(15A)-C(16A) | 1.451(7) |
| C(17A)-C(18A) | 1.459(7) |
| C(18A)-C(19A) | 1.377(7) |
| C(18A)-C(23A) | 1.427(7) |
| C(19A)-C(20A) | 1.383(7) |
| C(19A)-H(19A) | 0.9300   |
| C(20A)-C(21A) | 1.417(7) |
| C(21A)-C(22A) | 1.382(8) |
| C(22A)-C(23A) | 1.400(7) |
| C(22A)-H(22A) | 0.9300   |
| C(23A)-C(24A) | 1.465(7) |
| C(25A)-C(26A) | 1.388(7) |
| C(25A)-C(30A) | 1.392(7) |
| C(26A)-C(27A) | 1.408(7) |
| C(26A)-H(26A) | 0.9300   |
| C(27A)-C(28A) | 1.369(8) |
| C(28A)-C(29A) | 1.387(8) |
| C(28A)-H(28A) | 0.9300   |
| C(29A)-C(30A) | 1.386(7) |
| C(29A)-H(29A) | 0.9300   |
| C(30A)-H(30A) | 0.9300   |
| I(1B)-C(27B)  | 2.084(5) |
| Cl(1B)-C(4B)  | 1.715(6) |
| Cl(2B)-C(5B)  | 1.704(6) |
| Cl(3B)-C(12B) | 1.726(6) |

|               |          |
|---------------|----------|
| Cl(4B)-C(13B) | 1.727(5) |
| Cl(5B)-C(20B) | 1.729(6) |
| Cl(6B)-C(21B) | 1.722(6) |
| O(1B)-C(25B)  | 1.382(6) |
| O(1B)-B(1B)   | 1.421(7) |
| N(1B)-C(8B)   | 1.354(7) |
| N(1B)-C(1B)   | 1.365(7) |
| N(1B)-B(1B)   | 1.502(7) |
| N(2B)-C(9B)   | 1.335(7) |
| N(2B)-C(8B)   | 1.353(7) |
| N(3B)-C(16B)  | 1.368(7) |
| N(3B)-C(9B)   | 1.382(7) |
| N(3B)-B(1B)   | 1.509(7) |
| N(4B)-C(16B)  | 1.343(7) |
| N(4B)-C(17B)  | 1.352(7) |
| N(5B)-C(24B)  | 1.361(7) |
| N(5B)-C(17B)  | 1.384(7) |
| N(5B)-B(1B)   | 1.484(8) |
| N(6B)-C(1B)   | 1.349(7) |
| N(6B)-C(24B)  | 1.351(7) |
| C(1B)-C(2B)   | 1.461(8) |
| C(2B)-C(3B)   | 1.385(7) |
| C(2B)-C(7B)   | 1.422(8) |
| C(3B)-C(4B)   | 1.389(8) |
| C(3B)-H(3BA)  | 0.9300   |
| C(4B)-C(5B)   | 1.424(8) |
| C(5B)-C(6B)   | 1.388(8) |
| C(6B)-C(7B)   | 1.381(8) |
| C(6B)-H(6BA)  | 0.9300   |
| C(7B)-C(8B)   | 1.467(8) |
| C(9B)-C(10B)  | 1.455(7) |
| C(10B)-C(11B) | 1.400(8) |
| C(10B)-C(15B) | 1.400(8) |
| C(11B)-C(12B) | 1.365(8) |
| C(11B)-H(11B) | 0.9300   |
| C(12B)-C(13B) | 1.424(9) |

|                     |          |
|---------------------|----------|
| C(13B)-C(14B)       | 1.374(9) |
| C(14B)-C(15B)       | 1.381(7) |
| C(14B)-H(14B)       | 0.9300   |
| C(15B)-C(16B)       | 1.473(8) |
| C(17B)-C(18B)       | 1.426(8) |
| C(18B)-C(19B)       | 1.418(8) |
| C(18B)-C(23B)       | 1.429(7) |
| C(19B)-C(20B)       | 1.345(8) |
| C(19B)-H(19B)       | 0.9300   |
| C(20B)-C(21B)       | 1.430(8) |
| C(21B)-C(22B)       | 1.360(8) |
| C(22B)-C(23B)       | 1.376(8) |
| C(22B)-H(22B)       | 0.9300   |
| C(23B)-C(24B)       | 1.464(8) |
| C(25B)-C(30B)       | 1.380(8) |
| C(25B)-C(26B)       | 1.390(8) |
| C(26B)-C(27B)       | 1.392(7) |
| C(26B)-H(26B)       | 0.9300   |
| C(27B)-C(28B)       | 1.372(8) |
| C(28B)-C(29B)       | 1.399(8) |
| C(28B)-H(28B)       | 0.9300   |
| C(29B)-C(30B)       | 1.361(8) |
| C(29B)-H(29B)       | 0.9300   |
| C(30B)-H(30B)       | 0.9300   |
|                     |          |
| C(25A)-O(1A)-B(1A)  | 128.2(4) |
| C(8A)-N(1A)-C(1A)   | 114.8(4) |
| C(8A)-N(1A)-B(1A)   | 123.1(4) |
| C(1A)-N(1A)-B(1A)   | 121.7(4) |
| C(8A)-N(2A)-C(9A)   | 116.2(4) |
| C(9A)-N(3A)-C(16A)  | 113.0(4) |
| C(9A)-N(3A)-B(1A)   | 122.0(4) |
| C(16A)-N(3A)-B(1A)  | 122.8(4) |
| C(16A)-N(4A)-C(17A) | 117.2(4) |
| C(17A)-N(5A)-C(24A) | 113.6(4) |
| C(17A)-N(5A)-B(1A)  | 123.5(4) |

|                      |          |
|----------------------|----------|
| C(24A)-N(5A)-B(1A)   | 122.0(4) |
| C(24A)-N(6A)-C(1A)   | 116.8(4) |
| N(6A)-C(1A)-N(1A)    | 123.1(4) |
| N(6A)-C(1A)-C(2A)    | 131.1(5) |
| N(1A)-C(1A)-C(2A)    | 104.7(4) |
| C(3A)-C(2A)-C(7A)    | 120.5(5) |
| C(3A)-C(2A)-C(1A)    | 131.8(5) |
| C(7A)-C(2A)-C(1A)    | 107.7(4) |
| C(2A)-C(3A)-C(4A)    | 117.8(5) |
| C(2A)-C(3A)-H(3AA)   | 121.1    |
| C(4A)-C(3A)-H(3AA)   | 121.1    |
| C(3A)-C(4A)-C(5A)    | 121.3(5) |
| C(3A)-C(4A)-Cl(1A)   | 118.9(4) |
| C(5A)-C(4A)-Cl(1A)   | 119.8(4) |
| C(6A)-C(5A)-C(4A)    | 121.3(5) |
| C(6A)-C(5A)-Cl(2A)   | 118.9(5) |
| C(4A)-C(5A)-Cl(2A)   | 119.8(4) |
| C(7A)-C(6A)-C(5A)    | 117.6(5) |
| C(7A)-C(6A)-H(6AA)   | 121.2    |
| C(5A)-C(6A)-H(6AA)   | 121.2    |
| C(6A)-C(7A)-C(2A)    | 121.2(5) |
| C(6A)-C(7A)-C(8A)    | 131.7(5) |
| C(2A)-C(7A)-C(8A)    | 107.1(4) |
| N(2A)-C(8A)-N(1A)    | 122.9(4) |
| N(2A)-C(8A)-C(7A)    | 131.5(5) |
| N(1A)-C(8A)-C(7A)    | 104.5(4) |
| N(2A)-C(9A)-N(3A)    | 124.0(4) |
| N(2A)-C(9A)-C(10A)   | 128.3(4) |
| N(3A)-C(9A)-C(10A)   | 105.2(4) |
| C(11A)-C(10A)-C(15A) | 121.4(5) |
| C(11A)-C(10A)-C(9A)  | 131.7(5) |
| C(15A)-C(10A)-C(9A)  | 106.6(4) |
| C(10A)-C(11A)-C(12A) | 117.5(5) |
| C(10A)-C(11A)-H(11A) | 121.2    |
| C(12A)-C(11A)-H(11A) | 121.2    |
| C(13A)-C(12A)-C(11A) | 120.6(5) |

|                      |          |
|----------------------|----------|
| C(13A)-C(12A)-Cl(3A) | 121.4(4) |
| C(11A)-C(12A)-Cl(3A) | 118.0(4) |
| C(14A)-C(13A)-C(12A) | 122.3(5) |
| C(14A)-C(13A)-Cl(4A) | 117.6(4) |
| C(12A)-C(13A)-Cl(4A) | 120.0(4) |
| C(13A)-C(14A)-C(15A) | 117.3(5) |
| C(13A)-C(14A)-H(14A) | 121.4    |
| C(15A)-C(14A)-H(14A) | 121.4    |
| C(14A)-C(15A)-C(10A) | 120.8(5) |
| C(14A)-C(15A)-C(16A) | 130.3(5) |
| C(10A)-C(15A)-C(16A) | 108.3(4) |
| N(4A)-C(16A)-N(3A)   | 123.1(5) |
| N(4A)-C(16A)-C(15A)  | 129.4(5) |
| N(3A)-C(16A)-C(15A)  | 105.4(4) |
| N(4A)-C(17A)-N(5A)   | 123.0(5) |
| N(4A)-C(17A)-C(18A)  | 129.6(5) |
| N(5A)-C(17A)-C(18A)  | 106.1(4) |
| C(19A)-C(18A)-C(23A) | 121.5(5) |
| C(19A)-C(18A)-C(17A) | 131.4(5) |
| C(23A)-C(18A)-C(17A) | 106.8(4) |
| C(18A)-C(19A)-C(20A) | 118.4(5) |
| C(18A)-C(19A)-H(19A) | 120.8    |
| C(20A)-C(19A)-H(19A) | 120.8    |
| C(19A)-C(20A)-C(21A) | 120.5(5) |
| C(19A)-C(20A)-Cl(5A) | 119.1(4) |
| C(21A)-C(20A)-Cl(5A) | 120.5(4) |
| C(22A)-C(21A)-C(20A) | 121.7(5) |
| C(22A)-C(21A)-Cl(6A) | 119.1(4) |
| C(20A)-C(21A)-Cl(6A) | 119.2(4) |
| C(21A)-C(22A)-C(23A) | 117.7(5) |
| C(21A)-C(22A)-H(22A) | 121.1    |
| C(23A)-C(22A)-H(22A) | 121.1    |
| C(22A)-C(23A)-C(18A) | 119.9(5) |
| C(22A)-C(23A)-C(24A) | 132.7(5) |
| C(18A)-C(23A)-C(24A) | 107.3(4) |
| N(6A)-C(24A)-N(5A)   | 122.5(5) |

|                      |          |
|----------------------|----------|
| N(6A)-C(24A)-C(23A)  | 130.6(5) |
| N(5A)-C(24A)-C(23A)  | 104.8(4) |
| O(1A)-C(25A)-C(26A)  | 123.7(4) |
| O(1A)-C(25A)-C(30A)  | 115.9(4) |
| C(26A)-C(25A)-C(30A) | 120.4(5) |
| C(25A)-C(26A)-C(27A) | 118.3(5) |
| C(25A)-C(26A)-H(26A) | 120.8    |
| C(27A)-C(26A)-H(26A) | 120.8    |
| C(28A)-C(27A)-C(26A) | 121.7(5) |
| C(28A)-C(27A)-I(1A)  | 119.2(4) |
| C(26A)-C(27A)-I(1A)  | 119.1(4) |
| C(27A)-C(28A)-C(29A) | 119.0(5) |
| C(27A)-C(28A)-H(28A) | 120.5    |
| C(29A)-C(28A)-H(28A) | 120.5    |
| C(30A)-C(29A)-C(28A) | 120.8(5) |
| C(30A)-C(29A)-H(29A) | 119.6    |
| C(28A)-C(29A)-H(29A) | 119.6    |
| C(29A)-C(30A)-C(25A) | 119.7(5) |
| C(29A)-C(30A)-H(30A) | 120.1    |
| C(25A)-C(30A)-H(30A) | 120.1    |
| O(1A)-B(1A)-N(5A)    | 119.4(5) |
| O(1A)-B(1A)-N(3A)    | 118.2(4) |
| N(5A)-B(1A)-N(3A)    | 103.9(4) |
| O(1A)-B(1A)-N(1A)    | 107.3(4) |
| N(5A)-B(1A)-N(1A)    | 102.5(4) |
| N(3A)-B(1A)-N(1A)    | 103.4(4) |
| C(25B)-O(1B)-B(1B)   | 128.6(4) |
| C(8B)-N(1B)-C(1B)    | 113.3(5) |
| C(8B)-N(1B)-B(1B)    | 123.1(5) |
| C(1B)-N(1B)-B(1B)    | 123.0(5) |
| C(9B)-N(2B)-C(8B)    | 116.7(5) |
| C(16B)-N(3B)-C(9B)   | 112.5(4) |
| C(16B)-N(3B)-B(1B)   | 123.3(5) |
| C(9B)-N(3B)-B(1B)    | 122.4(4) |
| C(16B)-N(4B)-C(17B)  | 117.4(5) |
| C(24B)-N(5B)-C(17B)  | 111.5(4) |



|                      |          |
|----------------------|----------|
| C(24B)-N(5B)-B(1B)   | 123.3(5) |
| C(17B)-N(5B)-B(1B)   | 123.9(5) |
| C(1B)-N(6B)-C(24B)   | 116.2(5) |
| N(6B)-C(1B)-N(1B)    | 122.2(5) |
| N(6B)-C(1B)-C(2B)    | 130.4(5) |
| N(1B)-C(1B)-C(2B)    | 105.9(5) |
| C(3B)-C(2B)-C(7B)    | 121.9(5) |
| C(3B)-C(2B)-C(1B)    | 131.5(5) |
| C(7B)-C(2B)-C(1B)    | 106.5(5) |
| C(2B)-C(3B)-C(4B)    | 117.2(5) |
| C(2B)-C(3B)-H(3BA)   | 121.4    |
| C(4B)-C(3B)-H(3BA)   | 121.4    |
| C(3B)-C(4B)-C(5B)    | 121.5(5) |
| C(3B)-C(4B)-Cl(1B)   | 119.2(4) |
| C(5B)-C(4B)-Cl(1B)   | 119.2(4) |
| C(6B)-C(5B)-C(4B)    | 120.2(5) |
| C(6B)-C(5B)-Cl(2B)   | 119.5(5) |
| C(4B)-C(5B)-Cl(2B)   | 120.3(4) |
| C(7B)-C(6B)-C(5B)    | 118.9(5) |
| C(7B)-C(6B)-H(6BA)   | 120.6    |
| C(5B)-C(6B)-H(6BA)   | 120.6    |
| C(6B)-C(7B)-C(2B)    | 120.2(5) |
| C(6B)-C(7B)-C(8B)    | 132.6(5) |
| C(2B)-C(7B)-C(8B)    | 107.2(5) |
| N(2B)-C(8B)-N(1B)    | 123.2(5) |
| N(2B)-C(8B)-C(7B)    | 129.8(5) |
| N(1B)-C(8B)-C(7B)    | 105.7(5) |
| N(2B)-C(9B)-N(3B)    | 122.9(5) |
| N(2B)-C(9B)-C(10B)   | 130.3(5) |
| N(3B)-C(9B)-C(10B)   | 104.8(4) |
| C(11B)-C(10B)-C(15B) | 120.4(5) |
| C(11B)-C(10B)-C(9B)  | 130.4(5) |
| C(15B)-C(10B)-C(9B)  | 108.7(5) |
| C(12B)-C(11B)-C(10B) | 118.2(5) |
| C(12B)-C(11B)-H(11B) | 120.9    |
| C(10B)-C(11B)-H(11B) | 120.9    |

|                      |          |
|----------------------|----------|
| C(11B)-C(12B)-C(13B) | 120.9(5) |
| C(11B)-C(12B)-Cl(3B) | 119.1(5) |
| C(13B)-C(12B)-Cl(3B) | 119.9(4) |
| C(14B)-C(13B)-C(12B) | 120.9(5) |
| C(14B)-C(13B)-Cl(4B) | 119.1(5) |
| C(12B)-C(13B)-Cl(4B) | 119.9(5) |
| C(13B)-C(14B)-C(15B) | 117.9(5) |
| C(13B)-C(14B)-H(14B) | 121.0    |
| C(15B)-C(14B)-H(14B) | 121.0    |
| C(14B)-C(15B)-C(10B) | 121.6(5) |
| C(14B)-C(15B)-C(16B) | 131.5(5) |
| C(10B)-C(15B)-C(16B) | 106.6(5) |
| N(4B)-C(16B)-N(3B)   | 122.6(5) |
| N(4B)-C(16B)-C(15B)  | 129.6(5) |
| N(3B)-C(16B)-C(15B)  | 105.7(5) |
| N(4B)-C(17B)-N(5B)   | 121.7(5) |
| N(4B)-C(17B)-C(18B)  | 130.1(5) |
| N(5B)-C(17B)-C(18B)  | 106.5(4) |
| C(19B)-C(18B)-C(17B) | 132.9(5) |
| C(19B)-C(18B)-C(23B) | 118.9(5) |
| C(17B)-C(18B)-C(23B) | 108.1(5) |
| C(20B)-C(19B)-C(18B) | 118.8(5) |
| C(20B)-C(19B)-H(19B) | 120.6    |
| C(18B)-C(19B)-H(19B) | 120.6    |
| C(19B)-C(20B)-C(21B) | 121.9(5) |
| C(19B)-C(20B)-Cl(5B) | 118.5(4) |
| C(21B)-C(20B)-Cl(5B) | 119.6(4) |
| C(22B)-C(21B)-C(20B) | 119.7(5) |
| C(22B)-C(21B)-Cl(6B) | 121.0(4) |
| C(20B)-C(21B)-Cl(6B) | 119.3(4) |
| C(21B)-C(22B)-C(23B) | 119.9(5) |
| C(21B)-C(22B)-H(22B) | 120.0    |
| C(23B)-C(22B)-H(22B) | 120.0    |
| C(22B)-C(23B)-C(18B) | 120.6(5) |
| C(22B)-C(23B)-C(24B) | 133.7(5) |
| C(18B)-C(23B)-C(24B) | 105.6(5) |

|                      |          |
|----------------------|----------|
| N(6B)-C(24B)-N(5B)   | 122.9(5) |
| N(6B)-C(24B)-C(23B)  | 129.2(5) |
| N(5B)-C(24B)-C(23B)  | 106.7(5) |
| C(30B)-C(25B)-O(1B)  | 114.8(5) |
| C(30B)-C(25B)-C(26B) | 120.3(5) |
| O(1B)-C(25B)-C(26B)  | 124.8(5) |
| C(25B)-C(26B)-C(27B) | 118.2(5) |
| C(25B)-C(26B)-H(26B) | 120.9    |
| C(27B)-C(26B)-H(26B) | 120.9    |
| C(28B)-C(27B)-C(26B) | 121.8(5) |
| C(28B)-C(27B)-I(1B)  | 118.4(4) |
| C(26B)-C(27B)-I(1B)  | 119.8(4) |
| C(27B)-C(28B)-C(29B) | 118.6(5) |
| C(27B)-C(28B)-H(28B) | 120.7    |
| C(29B)-C(28B)-H(28B) | 120.7    |
| C(30B)-C(29B)-C(28B) | 120.3(6) |
| C(30B)-C(29B)-H(29B) | 119.8    |
| C(28B)-C(29B)-H(29B) | 119.8    |
| C(29B)-C(30B)-C(25B) | 120.8(6) |
| C(29B)-C(30B)-H(30B) | 119.6    |
| C(25B)-C(30B)-H(30B) | 119.6    |
| O(1B)-B(1B)-N(5B)    | 120.3(5) |
| O(1B)-B(1B)-N(1B)    | 108.0(4) |
| N(5B)-B(1B)-N(1B)    | 102.8(4) |
| O(1B)-B(1B)-N(3B)    | 116.3(5) |
| N(5B)-B(1B)-N(3B)    | 103.9(4) |
| N(1B)-B(1B)-N(3B)    | 103.5(4) |

---

Symmetry transformations used to generate equivalent atoms:

Table S 76. Anisotropic displacement parameters ( $\text{\AA}^2 \times 10^3$ ) for *m*-IPhO-Cl<sub>6</sub>BsubPc (Toluene:Heptane; CCDC deposit 2087103). The anisotropic displacement factor exponent takes the form:  $-2\pi^2 [h^2 a^{*2} U^{11} + \dots + 2 h k a^* b^* U^{12}]$ .

|        | U <sup>11</sup> | U <sup>22</sup> | U <sup>33</sup> | U <sup>23</sup> | U <sup>13</sup> | U <sup>12</sup> |
|--------|-----------------|-----------------|-----------------|-----------------|-----------------|-----------------|
| I(1A)  | 23(1)           | 24(1)           | 21(1)           | 3(1)            | -6(1)           | 1(1)            |
| Cl(1A) | 16(1)           | 21(1)           | 28(1)           | 5(1)            | -3(1)           | 3(1)            |
| Cl(2A) | 24(1)           | 40(1)           | 21(1)           | 8(1)            | -6(1)           | 4(1)            |
| Cl(3A) | 38(1)           | 39(1)           | 20(1)           | 0(1)            | 10(1)           | -2(1)           |
| Cl(4A) | 23(1)           | 38(1)           | 34(1)           | -5(1)           | 11(1)           | -5(1)           |
| Cl(5A) | 31(1)           | 42(1)           | 27(1)           | -16(1)          | -7(1)           | -2(1)           |
| Cl(6A) | 38(1)           | 26(1)           | 19(1)           | -7(1)           | 5(1)            | 3(1)            |
| O(1A)  | 17(2)           | 16(2)           | 20(2)           | 3(1)            | -2(2)           | 2(1)            |
| N(1A)  | 17(2)           | 14(2)           | 14(2)           | -1(2)           | -1(2)           | 0(2)            |
| N(2A)  | 19(2)           | 13(2)           | 15(2)           | 0(2)            | -2(2)           | -1(2)           |
| N(3A)  | 16(2)           | 14(2)           | 15(2)           | -2(2)           | 0(2)            | 4(2)            |
| N(4A)  | 15(2)           | 18(2)           | 16(2)           | 3(2)            | -3(2)           | 4(2)            |
| N(5A)  | 19(2)           | 12(2)           | 14(2)           | 3(2)            | -1(2)           | 1(2)            |
| N(6A)  | 17(2)           | 16(2)           | 17(2)           | 1(2)            | 2(2)            | 2(2)            |
| C(1A)  | 14(2)           | 15(2)           | 17(3)           | 2(2)            | 3(2)            | -3(2)           |
| C(2A)  | 13(2)           | 12(2)           | 22(3)           | 3(2)            | -1(2)           | -5(2)           |
| C(3A)  | 17(2)           | 13(2)           | 18(3)           | -1(2)           | -1(2)           | -2(2)           |
| C(4A)  | 14(2)           | 12(2)           | 27(3)           | 5(2)            | -3(2)           | 1(2)            |
| C(5A)  | 18(3)           | 19(3)           | 18(3)           | 7(2)            | -6(2)           | 0(2)            |
| C(6A)  | 17(2)           | 16(2)           | 19(3)           | 3(2)            | -1(2)           | -3(2)           |
| C(7A)  | 16(2)           | 12(2)           | 15(2)           | 3(2)            | 0(2)            | -2(2)           |
| C(8A)  | 17(2)           | 11(2)           | 17(3)           | 2(2)            | -3(2)           | -1(2)           |
| C(9A)  | 20(2)           | 15(2)           | 12(2)           | 0(2)            | 2(2)            | 1(2)            |
| C(10A) | 18(2)           | 13(2)           | 17(3)           | -1(2)           | 2(2)            | 1(2)            |
| C(11A) | 22(3)           | 16(2)           | 18(3)           | -1(2)           | -4(2)           | 6(2)            |
| C(12A) | 29(3)           | 16(2)           | 19(3)           | 1(2)            | 7(2)            | 5(2)            |
| C(13A) | 19(3)           | 19(3)           | 29(3)           | -2(2)           | 7(2)            | 2(2)            |
| C(14A) | 18(3)           | 17(2)           | 24(3)           | -4(2)           | 1(2)            | 4(2)            |
| C(15A) | 16(2)           | 15(2)           | 17(3)           | 0(2)            | 1(2)            | 4(2)            |
| C(16A) | 14(2)           | 16(2)           | 18(3)           | -2(2)           | -1(2)           | 4(2)            |

|        |       |       |       |       |       |        |
|--------|-------|-------|-------|-------|-------|--------|
| C(17A) | 16(2) | 16(2) | 12(2) | 3(2)  | -4(2) | 4(2)   |
| C(18A) | 21(2) | 19(2) | 12(2) | 2(2)  | -4(2) | 5(2)   |
| C(19A) | 19(3) | 25(3) | 17(3) | -1(2) | -4(2) | 5(2)   |
| C(20A) | 23(2) | 23(2) | 14(2) | -2(2) | -7(2) | 1(2)   |
| C(21A) | 26(3) | 19(2) | 14(2) | 2(2)  | 3(2)  | 4(2)   |
| C(22A) | 25(3) | 20(2) | 13(3) | 3(2)  | 4(2)  | 3(2)   |
| C(23A) | 19(2) | 16(2) | 13(2) | 3(2)  | 1(2)  | 1(2)   |
| C(24A) | 22(3) | 14(2) | 14(2) | 4(2)  | 2(2)  | 4(2)   |
| C(25A) | 14(2) | 14(2) | 18(3) | 4(2)  | 1(2)  | 4(2)   |
| C(26A) | 23(3) | 14(2) | 18(3) | 0(2)  | 0(2)  | 0(2)   |
| C(27A) | 17(2) | 22(2) | 18(3) | 3(2)  | -4(2) | 2(2)   |
| C(28A) | 24(3) | 17(3) | 33(3) | 9(2)  | -1(2) | 3(2)   |
| C(29A) | 27(3) | 14(2) | 38(4) | 2(2)  | -4(3) | -3(2)  |
| C(30A) | 15(2) | 19(2) | 23(3) | 2(2)  | 0(2)  | -3(2)  |
| B(1A)  | 18(3) | 16(3) | 15(3) | -2(2) | -2(2) | 5(2)   |
| I(1B)  | 24(1) | 40(1) | 29(1) | -5(1) | -4(1) | -3(1)  |
| Cl(1B) | 19(1) | 38(1) | 33(1) | 4(1)  | -4(1) | -7(1)  |
| Cl(2B) | 30(1) | 60(1) | 23(1) | 1(1)  | -9(1) | -16(1) |
| Cl(3B) | 27(1) | 53(1) | 25(1) | -4(1) | 7(1)  | -2(1)  |
| Cl(4B) | 19(1) | 37(1) | 38(1) | 0(1)  | 3(1)  | 3(1)   |
| Cl(5B) | 32(1) | 38(1) | 31(1) | 12(1) | -4(1) | 6(1)   |
| Cl(6B) | 34(1) | 29(1) | 25(1) | 6(1)  | 5(1)  | -1(1)  |
| O(1B)  | 23(2) | 24(2) | 25(2) | -7(2) | -4(2) | 0(2)   |
| N(1B)  | 17(2) | 20(2) | 19(2) | -2(2) | -1(2) | 2(2)   |
| N(2B)  | 19(2) | 21(2) | 19(2) | 1(2)  | 0(2)  | -1(2)  |
| N(3B)  | 20(2) | 20(2) | 17(2) | 0(2)  | -3(2) | -2(2)  |
| N(4B)  | 21(2) | 19(2) | 20(2) | 0(2)  | -2(2) | -4(2)  |
| N(5B)  | 18(2) | 22(2) | 16(2) | -4(2) | -1(2) | 0(2)   |
| N(6B)  | 16(2) | 25(2) | 20(2) | -3(2) | 1(2)  | 3(2)   |
| C(1B)  | 18(2) | 16(2) | 23(3) | -1(2) | -1(2) | 4(2)   |
| C(2B)  | 21(3) | 19(2) | 24(3) | -2(2) | 2(2)  | 6(2)   |
| C(3B)  | 18(2) | 20(2) | 17(3) | 1(2)  | 0(2)  | 2(2)   |
| C(4B)  | 20(3) | 20(3) | 29(3) | 2(2)  | -4(2) | 0(2)   |
| C(5B)  | 27(3) | 23(3) | 17(3) | 0(2)  | -7(2) | 5(2)   |
| C(6B)  | 16(2) | 25(3) | 20(3) | -1(2) | 4(2)  | 2(2)   |
| C(7B)  | 15(2) | 19(3) | 26(3) | 2(2)  | 0(2)  | 2(2)   |

|        |       |       |       |       |       |       |
|--------|-------|-------|-------|-------|-------|-------|
| C(8B)  | 17(3) | 18(2) | 24(3) | 0(2)  | -1(2) | 3(2)  |
| C(9B)  | 20(3) | 15(2) | 20(3) | 3(2)  | -2(2) | -3(2) |
| C(10B) | 19(3) | 13(2) | 24(3) | 2(2)  | -2(2) | -6(2) |
| C(11B) | 21(3) | 20(3) | 24(3) | 1(2)  | -1(2) | -6(2) |
| C(12B) | 24(3) | 19(2) | 21(3) | -1(2) | 3(2)  | -7(2) |
| C(13B) | 15(3) | 17(3) | 40(4) | 0(2)  | 2(2)  | -3(2) |
| C(14B) | 16(2) | 15(2) | 24(3) | 2(2)  | -6(2) | -3(2) |
| C(15B) | 22(3) | 17(2) | 21(3) | 2(2)  | -2(2) | -4(2) |
| C(16B) | 19(2) | 17(2) | 22(3) | -1(2) | 1(2)  | -1(2) |
| C(17B) | 17(2) | 25(3) | 18(3) | -7(2) | -3(2) | 0(2)  |
| C(18B) | 17(2) | 18(2) | 22(3) | -8(2) | 3(2)  | -1(2) |
| C(19B) | 25(3) | 24(3) | 16(3) | -3(2) | -3(2) | -1(2) |
| C(20B) | 29(3) | 20(3) | 25(3) | -5(2) | -8(2) | 6(2)  |
| C(21B) | 26(3) | 20(3) | 20(3) | -4(2) | 5(2)  | -3(2) |
| C(22B) | 22(2) | 18(2) | 17(3) | -6(2) | 0(2)  | -1(2) |
| C(23B) | 23(2) | 21(2) | 20(2) | -5(2) | -1(2) | -2(2) |
| C(24B) | 23(3) | 18(2) | 18(3) | -1(2) | 3(2)  | -2(2) |
| C(25B) | 22(3) | 21(3) | 20(3) | -4(2) | 5(2)  | -6(2) |
| C(26B) | 25(3) | 17(2) | 25(3) | -3(2) | 6(2)  | -1(2) |
| C(27B) | 18(2) | 26(3) | 16(3) | -2(2) | 5(2)  | -2(2) |
| C(28B) | 29(3) | 22(3) | 21(3) | -5(2) | 4(2)  | -8(2) |
| C(29B) | 36(3) | 20(3) | 30(3) | -3(2) | -3(3) | -3(2) |
| C(30B) | 35(3) | 26(3) | 22(3) | -1(2) | -3(2) | -6(2) |
| B(1B)  | 15(3) | 24(3) | 18(3) | -3(2) | 0(2)  | 0(2)  |

---

Table S 77. Hydrogen coordinates ( $\times 10^4$ ) and isotropic displacement parameters ( $\text{\AA}^2 \times 10^{-3}$ ) for *m*-IPhO-Cl<sub>6</sub>BsubPc (Toluene:Heptane; CCDC deposit 2087103).

|        | x     | y    | z    | U(eq) |
|--------|-------|------|------|-------|
| H(3AA) | 7937  | 384  | 6278 | 19    |
| H(6AA) | 6999  | 1292 | 8050 | 21    |
| H(11A) | 3856  | 2028 | 8392 | 23    |
| H(14A) | 1932  | 1498 | 6936 | 24    |
| H(19A) | 2882  | 422  | 5093 | 25    |
| H(22A) | 5739  | -13  | 4637 | 24    |
| H(26A) | 4144  | 3022 | 5413 | 22    |
| H(28A) | 3882  | 5633 | 5116 | 30    |
| H(29A) | 5000  | 5919 | 5713 | 31    |
| H(30A) | 5646  | 4778 | 6194 | 23    |
| H(3BA) | -3142 | 2978 | 3297 | 22    |
| H(6BA) | -1844 | 3888 | 1624 | 25    |
| H(11B) | 1351  | 4383 | 1523 | 26    |
| H(14B) | 3046  | 3814 | 3089 | 22    |
| H(19B) | 1688  | 2630 | 4891 | 26    |
| H(22B) | -1235 | 2298 | 5029 | 23    |
| H(26B) | 876   | 5453 | 4374 | 27    |
| H(28B) | 1217  | 8074 | 4556 | 29    |
| H(29B) | 129   | 8329 | 3918 | 34    |
| H(30B) | -567  | 7166 | 3521 | 33    |

Table S 78. Torsion angles [°] for *m*-IPhO-Cl<sub>6</sub>BsubPc (Toluene:Heptane; CCDC deposit 2087103).

---

|                           |           |
|---------------------------|-----------|
| C(24A)-N(6A)-C(1A)-N(1A)  | -9.0(7)   |
| C(24A)-N(6A)-C(1A)-C(2A)  | 156.9(5)  |
| C(8A)-N(1A)-C(1A)-N(6A)   | 157.4(5)  |
| B(1A)-N(1A)-C(1A)-N(6A)   | -15.4(7)  |
| C(8A)-N(1A)-C(1A)-C(2A)   | -11.6(5)  |
| B(1A)-N(1A)-C(1A)-C(2A)   | 175.5(4)  |
| N(6A)-C(1A)-C(2A)-C(3A)   | 19.0(9)   |
| N(1A)-C(1A)-C(2A)-C(3A)   | -173.2(5) |
| N(6A)-C(1A)-C(2A)-C(7A)   | -160.5(5) |
| N(1A)-C(1A)-C(2A)-C(7A)   | 7.3(5)    |
| C(7A)-C(2A)-C(3A)-C(4A)   | -2.7(7)   |
| C(1A)-C(2A)-C(3A)-C(4A)   | 177.8(5)  |
| C(2A)-C(3A)-C(4A)-C(5A)   | 5.3(7)    |
| C(2A)-C(3A)-C(4A)-Cl(1A)  | -172.9(4) |
| C(3A)-C(4A)-C(5A)-C(6A)   | -3.0(8)   |
| Cl(1A)-C(4A)-C(5A)-C(6A)  | 175.2(4)  |
| C(3A)-C(4A)-C(5A)-Cl(2A)  | 178.2(4)  |
| Cl(1A)-C(4A)-C(5A)-Cl(2A) | -3.6(6)   |
| C(4A)-C(5A)-C(6A)-C(7A)   | -2.1(8)   |
| Cl(2A)-C(5A)-C(6A)-C(7A)  | 176.7(4)  |
| C(5A)-C(6A)-C(7A)-C(2A)   | 4.6(7)    |
| C(5A)-C(6A)-C(7A)-C(8A)   | -177.3(5) |
| C(3A)-C(2A)-C(7A)-C(6A)   | -2.3(7)   |
| C(1A)-C(2A)-C(7A)-C(6A)   | 177.3(5)  |
| C(3A)-C(2A)-C(7A)-C(8A)   | 179.2(4)  |
| C(1A)-C(2A)-C(7A)-C(8A)   | -1.2(5)   |
| C(9A)-N(2A)-C(8A)-N(1A)   | 7.9(7)    |
| C(9A)-N(2A)-C(8A)-C(7A)   | -158.3(5) |
| C(1A)-N(1A)-C(8A)-N(2A)   | -158.5(4) |
| B(1A)-N(1A)-C(8A)-N(2A)   | 14.2(7)   |
| C(1A)-N(1A)-C(8A)-C(7A)   | 10.9(5)   |
| B(1A)-N(1A)-C(8A)-C(7A)   | -176.4(4) |
| C(6A)-C(7A)-C(8A)-N(2A)   | -15.7(9)  |



|                             |           |
|-----------------------------|-----------|
| C(2A)-C(7A)-C(8A)-N(2A)     | 162.6(5)  |
| C(6A)-C(7A)-C(8A)-N(1A)     | 176.3(5)  |
| C(2A)-C(7A)-C(8A)-N(1A)     | -5.4(5)   |
| C(8A)-N(2A)-C(9A)-N(3A)     | -8.4(7)   |
| C(8A)-N(2A)-C(9A)-C(10A)    | 150.8(5)  |
| C(16A)-N(3A)-C(9A)-N(2A)    | 150.4(5)  |
| B(1A)-N(3A)-C(9A)-N(2A)     | -13.3(7)  |
| C(16A)-N(3A)-C(9A)-C(10A)   | -12.8(5)  |
| B(1A)-N(3A)-C(9A)-C(10A)    | -176.5(4) |
| N(2A)-C(9A)-C(10A)-C(11A)   | 18.2(9)   |
| N(3A)-C(9A)-C(10A)-C(11A)   | -179.6(5) |
| N(2A)-C(9A)-C(10A)-C(15A)   | -154.5(5) |
| N(3A)-C(9A)-C(10A)-C(15A)   | 7.7(5)    |
| C(15A)-C(10A)-C(11A)-C(12A) | 0.8(7)    |
| C(9A)-C(10A)-C(11A)-C(12A)  | -171.0(5) |
| C(10A)-C(11A)-C(12A)-C(13A) | 1.9(7)    |
| C(10A)-C(11A)-C(12A)-Cl(3A) | -179.1(4) |
| C(11A)-C(12A)-C(13A)-C(14A) | -2.7(8)   |
| Cl(3A)-C(12A)-C(13A)-C(14A) | 178.2(4)  |
| C(11A)-C(12A)-C(13A)-Cl(4A) | 176.0(4)  |
| Cl(3A)-C(12A)-C(13A)-Cl(4A) | -3.0(6)   |
| C(12A)-C(13A)-C(14A)-C(15A) | 0.8(7)    |
| Cl(4A)-C(13A)-C(14A)-C(15A) | -178.0(4) |
| C(13A)-C(14A)-C(15A)-C(10A) | 1.9(7)    |
| C(13A)-C(14A)-C(15A)-C(16A) | 171.2(5)  |
| C(11A)-C(10A)-C(15A)-C(14A) | -2.8(7)   |
| C(9A)-C(10A)-C(15A)-C(14A)  | 170.9(4)  |
| C(11A)-C(10A)-C(15A)-C(16A) | -174.1(4) |
| C(9A)-C(10A)-C(15A)-C(16A)  | -0.5(5)   |
| C(17A)-N(4A)-C(16A)-N(3A)   | 8.0(7)    |
| C(17A)-N(4A)-C(16A)-C(15A)  | -153.1(5) |
| C(9A)-N(3A)-C(16A)-N(4A)    | -152.5(5) |
| B(1A)-N(3A)-C(16A)-N(4A)    | 11.1(7)   |
| C(9A)-N(3A)-C(16A)-C(15A)   | 12.5(5)   |
| B(1A)-N(3A)-C(16A)-C(15A)   | 176.0(4)  |
| C(14A)-C(15A)-C(16A)-N(4A)  | -13.5(9)  |

|                             |           |
|-----------------------------|-----------|
| C(10A)-C(15A)-C(16A)-N(4A)  | 156.8(5)  |
| C(14A)-C(15A)-C(16A)-N(3A)  | -177.1(5) |
| C(10A)-C(15A)-C(16A)-N(3A)  | -6.9(5)   |
| C(16A)-N(4A)-C(17A)-N(5A)   | -7.4(7)   |
| C(16A)-N(4A)-C(17A)-C(18A)  | 157.7(5)  |
| C(24A)-N(5A)-C(17A)-N(4A)   | 157.2(5)  |
| B(1A)-N(5A)-C(17A)-N(4A)    | -12.4(7)  |
| C(24A)-N(5A)-C(17A)-C(18A)  | -11.0(5)  |
| B(1A)-N(5A)-C(17A)-C(18A)   | 179.4(4)  |
| N(4A)-C(17A)-C(18A)-C(19A)  | 12.1(9)   |
| N(5A)-C(17A)-C(18A)-C(19A)  | 179.2(5)  |
| N(4A)-C(17A)-C(18A)-C(23A)  | -162.2(5) |
| N(5A)-C(17A)-C(18A)-C(23A)  | 4.9(5)    |
| C(23A)-C(18A)-C(19A)-C(20A) | -3.8(8)   |
| C(17A)-C(18A)-C(19A)-C(20A) | -177.4(5) |
| C(18A)-C(19A)-C(20A)-C(21A) | -1.3(8)   |
| C(18A)-C(19A)-C(20A)-Cl(5A) | 178.6(4)  |
| C(19A)-C(20A)-C(21A)-C(22A) | 5.5(8)    |
| Cl(5A)-C(20A)-C(21A)-C(22A) | -174.4(4) |
| C(19A)-C(20A)-C(21A)-Cl(6A) | -173.8(4) |
| Cl(5A)-C(20A)-C(21A)-Cl(6A) | 6.3(6)    |
| C(20A)-C(21A)-C(22A)-C(23A) | -4.3(7)   |
| Cl(6A)-C(21A)-C(22A)-C(23A) | 175.0(4)  |
| C(21A)-C(22A)-C(23A)-C(18A) | -0.8(7)   |
| C(21A)-C(22A)-C(23A)-C(24A) | 176.3(5)  |
| C(19A)-C(18A)-C(23A)-C(22A) | 5.0(8)    |
| C(17A)-C(18A)-C(23A)-C(22A) | 180.0(4)  |
| C(19A)-C(18A)-C(23A)-C(24A) | -172.8(5) |
| C(17A)-C(18A)-C(23A)-C(24A) | 2.2(5)    |
| C(1A)-N(6A)-C(24A)-N(5A)    | 8.3(7)    |
| C(1A)-N(6A)-C(24A)-C(23A)   | -152.5(5) |
| C(17A)-N(5A)-C(24A)-N(6A)   | -152.7(5) |
| B(1A)-N(5A)-C(24A)-N(6A)    | 17.0(7)   |
| C(17A)-N(5A)-C(24A)-C(23A)  | 12.2(5)   |
| B(1A)-N(5A)-C(24A)-C(23A)   | -178.0(4) |
| C(22A)-C(23A)-C(24A)-N(6A)  | -22.4(9)  |

|                             |           |
|-----------------------------|-----------|
| C(18A)-C(23A)-C(24A)-N(6A)  | 154.9(5)  |
| C(22A)-C(23A)-C(24A)-N(5A)  | 174.3(5)  |
| C(18A)-C(23A)-C(24A)-N(5A)  | -8.3(5)   |
| B(1A)-O(1A)-C(25A)-C(26A)   | -24.5(8)  |
| B(1A)-O(1A)-C(25A)-C(30A)   | 157.4(5)  |
| O(1A)-C(25A)-C(26A)-C(27A)  | 179.7(5)  |
| C(30A)-C(25A)-C(26A)-C(27A) | -2.2(8)   |
| C(25A)-C(26A)-C(27A)-C(28A) | 0.4(8)    |
| C(25A)-C(26A)-C(27A)-I(1A)  | 178.9(4)  |
| C(26A)-C(27A)-C(28A)-C(29A) | 2.1(9)    |
| I(1A)-C(27A)-C(28A)-C(29A)  | -176.4(4) |
| C(27A)-C(28A)-C(29A)-C(30A) | -2.7(9)   |
| C(28A)-C(29A)-C(30A)-C(25A) | 0.9(9)    |
| O(1A)-C(25A)-C(30A)-C(29A)  | 179.8(5)  |
| C(26A)-C(25A)-C(30A)-C(29A) | 1.6(8)    |
| C(25A)-O(1A)-B(1A)-N(5A)    | 58.4(7)   |
| C(25A)-O(1A)-B(1A)-N(3A)    | -69.5(7)  |
| C(25A)-O(1A)-B(1A)-N(1A)    | 174.3(4)  |
| C(17A)-N(5A)-B(1A)-O(1A)    | -107.8(6) |
| C(24A)-N(5A)-B(1A)-O(1A)    | 83.5(6)   |
| C(17A)-N(5A)-B(1A)-N(3A)    | 26.5(6)   |
| C(24A)-N(5A)-B(1A)-N(3A)    | -142.2(4) |
| C(17A)-N(5A)-B(1A)-N(1A)    | 133.9(4)  |
| C(24A)-N(5A)-B(1A)-N(1A)    | -34.8(6)  |
| C(9A)-N(3A)-B(1A)-O(1A)     | -88.7(6)  |
| C(16A)-N(3A)-B(1A)-O(1A)    | 109.2(5)  |
| C(9A)-N(3A)-B(1A)-N(5A)     | 136.4(4)  |
| C(16A)-N(3A)-B(1A)-N(5A)    | -25.7(6)  |
| C(9A)-N(3A)-B(1A)-N(1A)     | 29.6(6)   |
| C(16A)-N(3A)-B(1A)-N(1A)    | -132.5(4) |
| C(8A)-N(1A)-B(1A)-O(1A)     | 95.2(5)   |
| C(1A)-N(1A)-B(1A)-O(1A)     | -92.6(5)  |
| C(8A)-N(1A)-B(1A)-N(5A)     | -138.2(4) |
| C(1A)-N(1A)-B(1A)-N(5A)     | 34.0(6)   |
| C(8A)-N(1A)-B(1A)-N(3A)     | -30.4(6)  |
| C(1A)-N(1A)-B(1A)-N(3A)     | 141.8(4)  |

|                           |           |
|---------------------------|-----------|
| C(24B)-N(6B)-C(1B)-N(1B)  | -7.4(7)   |
| C(24B)-N(6B)-C(1B)-C(2B)  | 156.3(5)  |
| C(8B)-N(1B)-C(1B)-N(6B)   | 154.7(5)  |
| B(1B)-N(1B)-C(1B)-N(6B)   | -16.9(8)  |
| C(8B)-N(1B)-C(1B)-C(2B)   | -12.4(6)  |
| B(1B)-N(1B)-C(1B)-C(2B)   | 176.0(5)  |
| N(6B)-C(1B)-C(2B)-C(3B)   | 19.1(9)   |
| N(1B)-C(1B)-C(2B)-C(3B)   | -175.3(5) |
| N(6B)-C(1B)-C(2B)-C(7B)   | -157.4(5) |
| N(1B)-C(1B)-C(2B)-C(7B)   | 8.3(5)    |
| C(7B)-C(2B)-C(3B)-C(4B)   | -1.2(8)   |
| C(1B)-C(2B)-C(3B)-C(4B)   | -177.2(5) |
| C(2B)-C(3B)-C(4B)-C(5B)   | 1.7(8)    |
| C(2B)-C(3B)-C(4B)-Cl(1B)  | 178.3(4)  |
| C(3B)-C(4B)-C(5B)-C(6B)   | -0.4(8)   |
| Cl(1B)-C(4B)-C(5B)-C(6B)  | -177.0(4) |
| C(3B)-C(4B)-C(5B)-Cl(2B)  | -178.7(4) |
| Cl(1B)-C(4B)-C(5B)-Cl(2B) | 4.7(7)    |
| C(4B)-C(5B)-C(6B)-C(7B)   | -1.5(8)   |
| Cl(2B)-C(5B)-C(6B)-C(7B)  | 176.8(4)  |
| C(5B)-C(6B)-C(7B)-C(2B)   | 1.9(8)    |
| C(5B)-C(6B)-C(7B)-C(8B)   | 179.6(5)  |
| C(3B)-C(2B)-C(7B)-C(6B)   | -0.6(8)   |
| C(1B)-C(2B)-C(7B)-C(6B)   | 176.3(5)  |
| C(3B)-C(2B)-C(7B)-C(8B)   | -178.8(5) |
| C(1B)-C(2B)-C(7B)-C(8B)   | -1.9(6)   |
| C(9B)-N(2B)-C(8B)-N(1B)   | 6.8(7)    |
| C(9B)-N(2B)-C(8B)-C(7B)   | -157.8(5) |
| C(1B)-N(1B)-C(8B)-N(2B)   | -156.7(5) |
| B(1B)-N(1B)-C(8B)-N(2B)   | 14.9(8)   |
| C(1B)-N(1B)-C(8B)-C(7B)   | 11.1(6)   |
| B(1B)-N(1B)-C(8B)-C(7B)   | -177.3(5) |
| C(6B)-C(7B)-C(8B)-N(2B)   | -16.3(10) |
| C(2B)-C(7B)-C(8B)-N(2B)   | 161.6(5)  |
| C(6B)-C(7B)-C(8B)-N(1B)   | 176.9(6)  |
| C(2B)-C(7B)-C(8B)-N(1B)   | -5.1(6)   |

|                             |           |
|-----------------------------|-----------|
| C(8B)-N(2B)-C(9B)-N(3B)     | -7.7(7)   |
| C(8B)-N(2B)-C(9B)-C(10B)    | 154.1(5)  |
| C(16B)-N(3B)-C(9B)-N(2B)    | 152.5(5)  |
| B(1B)-N(3B)-C(9B)-N(2B)     | -12.8(8)  |
| C(16B)-N(3B)-C(9B)-C(10B)   | -13.2(6)  |
| B(1B)-N(3B)-C(9B)-C(10B)    | -178.5(4) |
| N(2B)-C(9B)-C(10B)-C(11B)   | 15.9(9)   |
| N(3B)-C(9B)-C(10B)-C(11B)   | -179.9(5) |
| N(2B)-C(9B)-C(10B)-C(15B)   | -156.3(5) |
| N(3B)-C(9B)-C(10B)-C(15B)   | 8.0(5)    |
| C(15B)-C(10B)-C(11B)-C(12B) | -0.6(8)   |
| C(9B)-C(10B)-C(11B)-C(12B)  | -171.9(5) |
| C(10B)-C(11B)-C(12B)-C(13B) | 1.0(8)    |
| C(10B)-C(11B)-C(12B)-Cl(3B) | 179.9(4)  |
| C(11B)-C(12B)-C(13B)-C(14B) | -1.2(8)   |
| Cl(3B)-C(12B)-C(13B)-C(14B) | 179.9(4)  |
| C(11B)-C(12B)-C(13B)-Cl(4B) | 178.3(4)  |
| Cl(3B)-C(12B)-C(13B)-Cl(4B) | -0.6(6)   |
| C(12B)-C(13B)-C(14B)-C(15B) | 0.9(8)    |
| Cl(4B)-C(13B)-C(14B)-C(15B) | -178.6(4) |
| C(13B)-C(14B)-C(15B)-C(10B) | -0.5(8)   |
| C(13B)-C(14B)-C(15B)-C(16B) | 171.7(5)  |
| C(11B)-C(10B)-C(15B)-C(14B) | 0.3(8)    |
| C(9B)-C(10B)-C(15B)-C(14B)  | 173.4(5)  |
| C(11B)-C(10B)-C(15B)-C(16B) | -173.6(5) |
| C(9B)-C(10B)-C(15B)-C(16B)  | -0.5(6)   |
| C(17B)-N(4B)-C(16B)-N(3B)   | 7.2(8)    |
| C(17B)-N(4B)-C(16B)-C(15B)  | -154.0(5) |
| C(9B)-N(3B)-C(16B)-N(4B)    | -152.0(5) |
| B(1B)-N(3B)-C(16B)-N(4B)    | 13.2(8)   |
| C(9B)-N(3B)-C(16B)-C(15B)   | 13.0(6)   |
| B(1B)-N(3B)-C(16B)-C(15B)   | 178.2(4)  |
| C(14B)-C(15B)-C(16B)-N(4B)  | -16.8(10) |
| C(10B)-C(15B)-C(16B)-N(4B)  | 156.3(5)  |
| C(14B)-C(15B)-C(16B)-N(3B)  | 179.7(5)  |
| C(10B)-C(15B)-C(16B)-N(3B)  | -7.3(5)   |

|                             |           |
|-----------------------------|-----------|
| C(16B)-N(4B)-C(17B)-N(5B)   | -7.7(7)   |
| C(16B)-N(4B)-C(17B)-C(18B)  | 155.7(5)  |
| C(24B)-N(5B)-C(17B)-N(4B)   | 155.1(5)  |
| B(1B)-N(5B)-C(17B)-N(4B)    | -12.3(8)  |
| C(24B)-N(5B)-C(17B)-C(18B)  | -11.8(6)  |
| B(1B)-N(5B)-C(17B)-C(18B)   | -179.2(4) |
| N(4B)-C(17B)-C(18B)-C(19B)  | 17.6(10)  |
| N(5B)-C(17B)-C(18B)-C(19B)  | -177.1(5) |
| N(4B)-C(17B)-C(18B)-C(23B)  | -160.1(5) |
| N(5B)-C(17B)-C(18B)-C(23B)  | 5.2(6)    |
| C(17B)-C(18B)-C(19B)-C(20B) | -179.9(5) |
| C(23B)-C(18B)-C(19B)-C(20B) | -2.4(7)   |
| C(18B)-C(19B)-C(20B)-C(21B) | -0.1(8)   |
| C(18B)-C(19B)-C(20B)-Cl(5B) | 179.5(4)  |
| C(19B)-C(20B)-C(21B)-C(22B) | 3.6(8)    |
| Cl(5B)-C(20B)-C(21B)-C(22B) | -175.9(4) |
| C(19B)-C(20B)-C(21B)-Cl(6B) | -176.9(4) |
| Cl(5B)-C(20B)-C(21B)-Cl(6B) | 3.5(6)    |
| C(20B)-C(21B)-C(22B)-C(23B) | -4.5(8)   |
| Cl(6B)-C(21B)-C(22B)-C(23B) | 176.1(4)  |
| C(21B)-C(22B)-C(23B)-C(18B) | 1.9(8)    |
| C(21B)-C(22B)-C(23B)-C(24B) | 178.1(5)  |
| C(19B)-C(18B)-C(23B)-C(22B) | 1.5(7)    |
| C(17B)-C(18B)-C(23B)-C(22B) | 179.6(5)  |
| C(19B)-C(18B)-C(23B)-C(24B) | -175.6(5) |
| C(17B)-C(18B)-C(23B)-C(24B) | 2.5(6)    |
| C(1B)-N(6B)-C(24B)-N(5B)    | 9.6(7)    |
| C(1B)-N(6B)-C(24B)-C(23B)   | -155.7(5) |
| C(17B)-N(5B)-C(24B)-N(6B)   | -154.8(5) |
| B(1B)-N(5B)-C(24B)-N(6B)    | 12.7(8)   |
| C(17B)-N(5B)-C(24B)-C(23B)  | 13.3(6)   |
| B(1B)-N(5B)-C(24B)-C(23B)   | -179.2(5) |
| C(22B)-C(23B)-C(24B)-N(6B)  | -18.9(10) |
| C(18B)-C(23B)-C(24B)-N(6B)  | 157.7(5)  |
| C(22B)-C(23B)-C(24B)-N(5B)  | 174.0(5)  |
| C(18B)-C(23B)-C(24B)-N(5B)  | -9.4(6)   |

|                             |           |
|-----------------------------|-----------|
| B(1B)-O(1B)-C(25B)-C(30B)   | 154.5(5)  |
| B(1B)-O(1B)-C(25B)-C(26B)   | -28.9(9)  |
| C(30B)-C(25B)-C(26B)-C(27B) | 0.2(8)    |
| O(1B)-C(25B)-C(26B)-C(27B)  | -176.3(5) |
| C(25B)-C(26B)-C(27B)-C(28B) | -1.8(8)   |
| C(25B)-C(26B)-C(27B)-I(1B)  | 175.7(4)  |
| C(26B)-C(27B)-C(28B)-C(29B) | 2.1(8)    |
| I(1B)-C(27B)-C(28B)-C(29B)  | -175.3(4) |
| C(27B)-C(28B)-C(29B)-C(30B) | -0.9(9)   |
| C(28B)-C(29B)-C(30B)-C(25B) | -0.6(9)   |
| O(1B)-C(25B)-C(30B)-C(29B)  | 177.8(5)  |
| C(26B)-C(25B)-C(30B)-C(29B) | 1.0(9)    |
| C(25B)-O(1B)-B(1B)-N(5B)    | 68.8(7)   |
| C(25B)-O(1B)-B(1B)-N(1B)    | -173.8(5) |
| C(25B)-O(1B)-B(1B)-N(3B)    | -58.0(8)  |
| C(24B)-N(5B)-B(1B)-O(1B)    | 89.1(6)   |
| C(17B)-N(5B)-B(1B)-O(1B)    | -104.9(6) |
| C(24B)-N(5B)-B(1B)-N(1B)    | -30.9(6)  |
| C(17B)-N(5B)-B(1B)-N(1B)    | 135.1(5)  |
| C(24B)-N(5B)-B(1B)-N(3B)    | -138.5(5) |
| C(17B)-N(5B)-B(1B)-N(3B)    | 27.4(6)   |
| C(8B)-N(1B)-B(1B)-O(1B)     | 94.0(6)   |
| C(1B)-N(1B)-B(1B)-O(1B)     | -95.2(6)  |
| C(8B)-N(1B)-B(1B)-N(5B)     | -137.8(5) |
| C(1B)-N(1B)-B(1B)-N(5B)     | 33.0(6)   |
| C(8B)-N(1B)-B(1B)-N(3B)     | -29.9(7)  |
| C(1B)-N(1B)-B(1B)-N(3B)     | 140.9(5)  |
| C(16B)-N(3B)-B(1B)-O(1B)    | 106.7(6)  |
| C(9B)-N(3B)-B(1B)-O(1B)     | -89.5(6)  |
| C(16B)-N(3B)-B(1B)-N(5B)    | -27.8(6)  |
| C(9B)-N(3B)-B(1B)-N(5B)     | 135.9(5)  |
| C(16B)-N(3B)-B(1B)-N(1B)    | -135.0(5) |
| C(9B)-N(3B)-B(1B)-N(1B)     | 28.8(6)   |

---

Symmetry transformations used to generate equivalent atoms:

a)

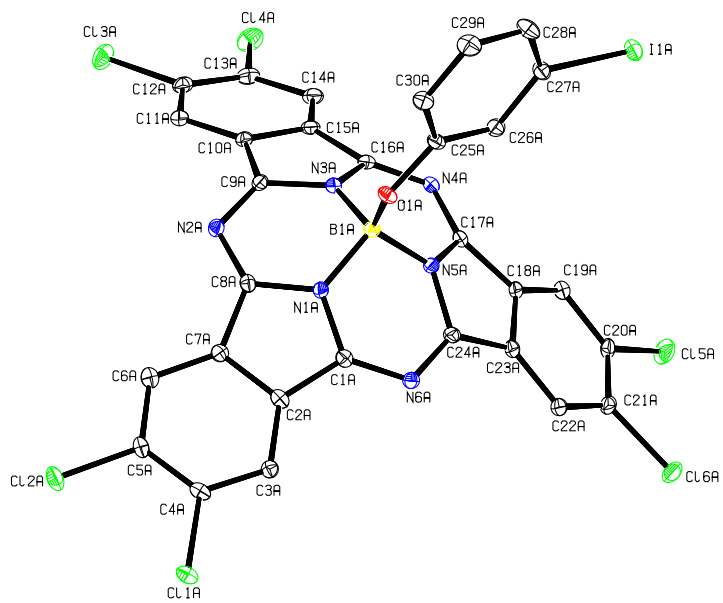

b)



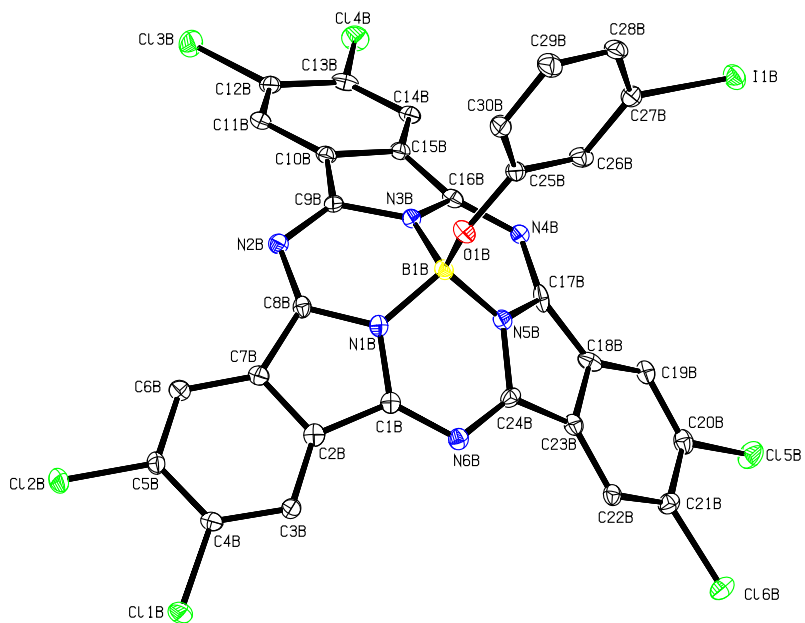

Figure S40: Anisotropic displacement ellipsoid plots of individual co-crystals of *m*-IPhO-Cl<sub>6</sub>BsubPc (Chlorobenzene:Heptane; CCDC deposit 2087106).

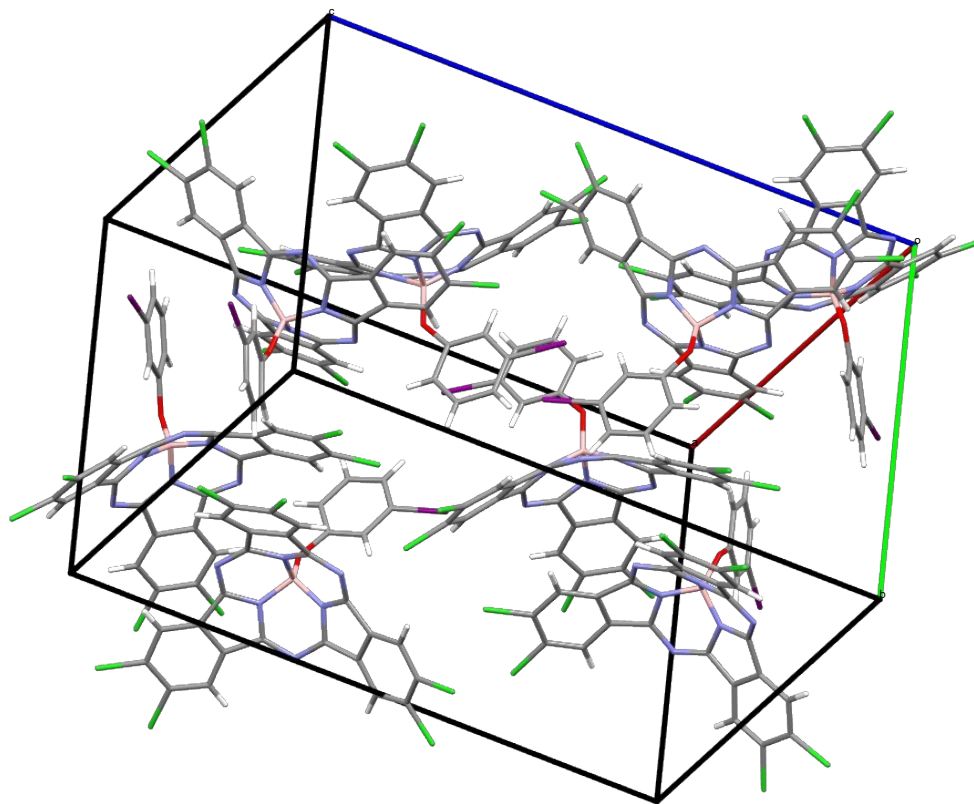

Figure S41: Populated unit cell of *m*-IPhO-Cl<sub>6</sub>BsubPc (Chlorobenzene:Heptane; CCDC deposit 2087106).

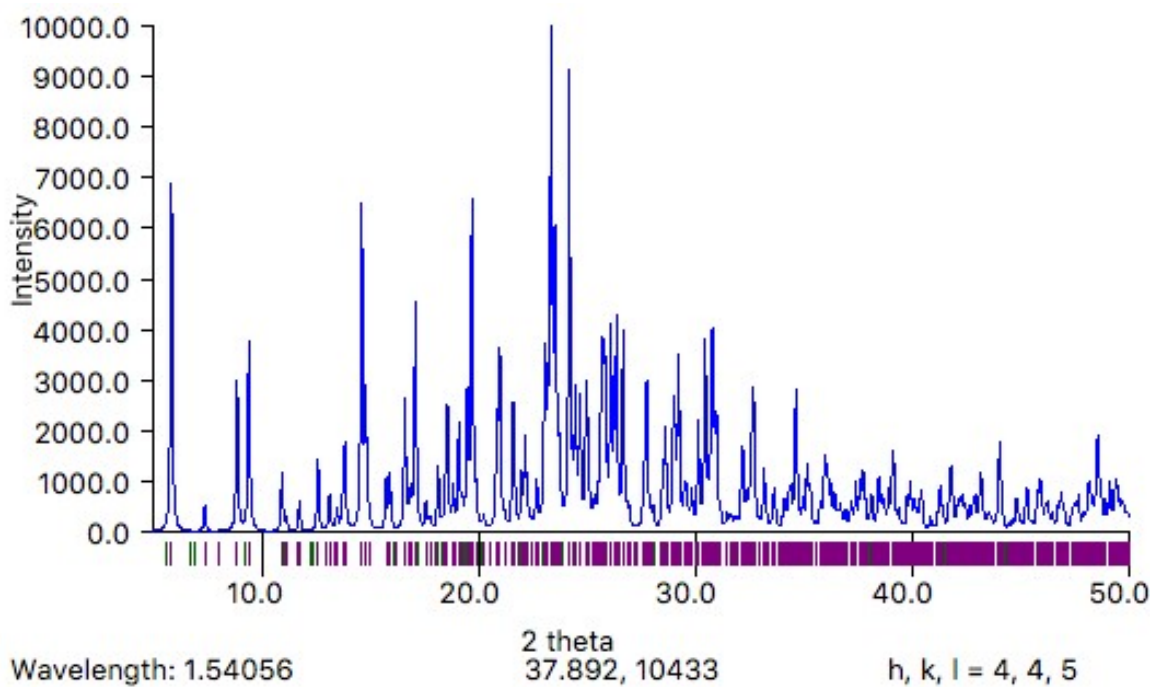

Figure S 42: Powder x-ray diffraction of *m*IPhO-Cl<sub>6</sub>BsubPc (Chlorobenzene:Heptane; CCDC deposit 2087106).

Table S 79. Crystal data and structure refinement for *m*-IPhO-Cl<sub>6</sub>BsubPc (Chlorobenzene:Heptane; CCDC deposit 2087106).

|                                   |                                                                      |          |
|-----------------------------------|----------------------------------------------------------------------|----------|
| Identification code               | d19232a_a                                                            |          |
| Empirical formula                 | C <sub>30</sub> H <sub>10</sub> B Cl <sub>6</sub> I N <sub>6</sub> O |          |
| Formula weight                    | 820.85                                                               |          |
| Temperature                       | 150(2) K                                                             |          |
| Wavelength                        | 0.71073 Å                                                            |          |
| Crystal system                    | Orthorhombic                                                         |          |
| Space group                       | Pca2 <sub>1</sub>                                                    |          |
| Unit cell dimensions              | a = 15.8551(3) Å                                                     | α = 90°. |
|                                   | b = 15.1122(3) Å                                                     | β = 90°. |
|                                   | c = 23.9203(5) Å                                                     | γ = 90°. |
| Volume                            | 5731.4(2) Å <sup>3</sup>                                             |          |
| Z                                 | 8                                                                    |          |
| Density (calculated)              | 1.903 Mg/m <sup>3</sup>                                              |          |
| Absorption coefficient            | 1.718 mm <sup>-1</sup>                                               |          |
| F(000)                            | 3200                                                                 |          |
| Crystal size                      | 0.350 x 0.320 x 0.300 mm <sup>3</sup>                                |          |
| Theta range for data collection   | 1.862 to 27.490°.                                                    |          |
| Index ranges                      | -20 ≤ h ≤ 20, -19 ≤ k ≤ 19, -31 ≤ l ≤ 31                             |          |
| Reflections collected             | 130895                                                               |          |
| Independent reflections           | 13117 [R(int) = 0.0361]                                              |          |
| Completeness to theta = 25.242°   | 99.9 %                                                               |          |
| Absorption correction             | Semi-empirical from equivalents                                      |          |
| Max. and min. transmission        | 0.7456 and 0.6732                                                    |          |
| Refinement method                 | Full-matrix least-squares on F <sup>2</sup>                          |          |
| Data / restraints / parameters    | 13117 / 1 / 811                                                      |          |
| Goodness-of-fit on F <sup>2</sup> | 1.025                                                                |          |
| Final R indices [I > 2σ(I)]       | R1 = 0.0255, wR2 = 0.0652                                            |          |
| R indices (all data)              | R1 = 0.0289, wR2 = 0.0665                                            |          |
| Absolute structure parameter      | -0.015(3)                                                            |          |
| Extinction coefficient            | n/a                                                                  |          |
| Largest diff. peak and hole       | 1.252 and -0.757 e.Å <sup>-3</sup>                                   |          |

Table S 80. Atomic coordinates ( $\times 10^4$ ) and equivalent isotropic displacement parameters ( $\text{\AA}^2 \times 10^3$ ) for *m*-IPhO-Cl<sub>6</sub>BsubPc (Chlorobenzene:Heptane; CCDC deposit 2087106). U(eq) is defined as one third of the trace of the orthogonalized U<sup>ij</sup> tensor.

|        | x       | y       | z       | U(eq) |
|--------|---------|---------|---------|-------|
| I(1A)  | 2973(1) | 4044(1) | 4614(1) | 25(1) |
| Cl(1A) | 9253(1) | 20(1)   | 7024(1) | 24(1) |
| Cl(2A) | 8589(1) | 522(1)  | 8209(1) | 30(1) |
| Cl(3A) | 2329(1) | 1579(1) | 8902(1) | 34(1) |
| Cl(4A) | 1065(1) | 1134(1) | 7921(1) | 33(1) |
| Cl(5A) | 2912(1) | -819(1) | 4232(1) | 34(1) |
| Cl(6A) | 4799(1) | -960(1) | 3851(1) | 28(1) |
| O(1A)  | 5364(2) | 3158(2) | 6160(1) | 19(1) |
| N(1A)  | 5817(2) | 1823(2) | 6580(2) | 16(1) |
| N(2A)  | 5314(2) | 2010(2) | 7508(2) | 18(1) |
| N(3A)  | 4388(2) | 2205(2) | 6728(2) | 17(1) |
| N(4A)  | 3393(2) | 1587(2) | 6093(2) | 18(1) |
| N(5A)  | 4841(2) | 1655(2) | 5852(2) | 16(1) |
| N(6A)  | 6208(2) | 1021(2) | 5766(2) | 17(1) |
| C(1A)  | 6370(3) | 1314(3) | 6283(2) | 18(1) |
| C(2A)  | 7010(3) | 1053(3) | 6686(2) | 18(1) |
| C(3A)  | 7765(3) | 595(3)  | 6627(2) | 17(1) |
| C(4A)  | 8255(3) | 471(3)  | 7099(2) | 18(1) |
| C(5A)  | 7967(3) | 720(3)  | 7629(2) | 20(1) |
| C(6A)  | 7193(3) | 1143(3) | 7700(2) | 20(1) |
| C(7A)  | 6730(3) | 1334(3) | 7223(2) | 18(1) |
| C(8A)  | 5925(3) | 1794(3) | 7146(2) | 17(1) |
| C(9A)  | 4542(3) | 2157(3) | 7290(2) | 18(1) |
| C(10A) | 3713(3) | 2022(3) | 7552(2) | 18(1) |
| C(11A) | 3477(3) | 1929(3) | 8106(2) | 21(1) |
| C(12A) | 2642(3) | 1682(3) | 8213(2) | 23(1) |
| C(13A) | 2081(3) | 1506(3) | 7778(2) | 23(1) |
| C(14A) | 2306(3) | 1603(3) | 7224(2) | 22(1) |
| C(15A) | 3135(3) | 1879(3) | 7113(2) | 19(1) |
| C(16A) | 3591(3) | 1935(3) | 6588(2) | 17(1) |

|        |          |         |         |       |
|--------|----------|---------|---------|-------|
| C(17A) | 4031(3)  | 1413(3) | 5747(2) | 17(1) |
| C(18A) | 4074(3)  | 803(3)  | 5276(2) | 18(1) |
| C(19A) | 3442(3)  | 348(3)  | 4999(2) | 22(1) |
| C(20A) | 3682(3)  | -221(3) | 4575(2) | 21(1) |
| C(21A) | 4540(3)  | -324(3) | 4425(2) | 21(1) |
| C(22A) | 5174(3)  | 88(3)   | 4725(2) | 20(1) |
| C(23A) | 4939(3)  | 658(3)  | 5157(2) | 17(1) |
| C(24A) | 5428(3)  | 1151(3) | 5573(2) | 18(1) |
| C(25A) | 4943(3)  | 3787(3) | 5857(2) | 18(1) |
| C(26A) | 4307(3)  | 3603(3) | 5481(2) | 20(1) |
| C(27A) | 3916(3)  | 4310(3) | 5200(2) | 22(1) |
| C(28A) | 4159(3)  | 5172(3) | 5292(2) | 27(1) |
| C(29A) | 4819(3)  | 5342(3) | 5660(2) | 28(1) |
| C(30A) | 5206(3)  | 4659(3) | 5943(2) | 22(1) |
| B(1A)  | 5091(3)  | 2289(3) | 6306(2) | 17(1) |
| I(1B)  | 2031(1)  | 6529(1) | 5154(1) | 31(1) |
| Cl(1B) | -4231(1) | 2503(1) | 2430(1) | 29(1) |
| Cl(2B) | -3405(1) | 3182(1) | 1327(1) | 38(1) |
| Cl(3B) | 2921(1)  | 3905(1) | 1107(1) | 35(1) |
| Cl(4B) | 4050(1)  | 3488(1) | 2155(1) | 32(1) |
| Cl(5B) | 1425(1)  | 1414(1) | 5722(1) | 34(1) |
| Cl(6B) | -529(1)  | 1268(1) | 5877(1) | 29(1) |
| O(1B)  | -399(2)  | 5560(2) | 3646(1) | 24(1) |
| N(1B)  | -897(2)  | 4277(2) | 3184(2) | 19(1) |
| N(2B)  | -222(2)  | 4433(2) | 2301(2) | 20(1) |
| N(3B)  | 577(2)   | 4541(2) | 3142(2) | 19(1) |
| N(4B)  | 1426(2)  | 3863(2) | 3839(2) | 20(1) |
| N(5B)  | -59(2)   | 4010(2) | 3972(2) | 19(1) |
| N(6B)  | -1459(2) | 3446(2) | 3936(2) | 21(1) |
| C(1B)  | -1527(3) | 3795(3) | 3420(2) | 20(1) |
| C(2B)  | -2112(3) | 3592(3) | 2970(2) | 21(1) |
| C(3B)  | -2889(3) | 3172(3) | 2968(2) | 20(1) |
| C(4B)  | -3276(3) | 3048(3) | 2455(2) | 22(1) |
| C(5B)  | -2894(3) | 3323(3) | 1950(2) | 22(1) |
| C(6B)  | -2109(3) | 3725(3) | 1957(2) | 21(1) |
| C(7B)  | -1719(3) | 3874(3) | 2465(2) | 20(1) |

|        |         |         |         |       |
|--------|---------|---------|---------|-------|
| C(8B)  | -911(3) | 4269(3) | 2615(2) | 19(1) |
| C(9B)  | 514(3)  | 4514(3) | 2574(2) | 19(1) |
| C(10B) | 1364(3) | 4357(3) | 2373(2) | 20(1) |
| C(11B) | 1689(3) | 4278(3) | 1829(2) | 22(1) |
| C(12B) | 2512(3) | 4018(3) | 1768(2) | 22(1) |
| C(13B) | 3023(3) | 3837(3) | 2243(2) | 24(1) |
| C(14B) | 2711(3) | 3922(3) | 2779(2) | 20(1) |
| C(15B) | 1878(3) | 4186(3) | 2841(2) | 21(1) |
| C(16B) | 1331(3) | 4237(3) | 3332(2) | 21(1) |
| C(17B) | 721(3)  | 3696(3) | 4139(2) | 23(1) |
| C(18B) | 563(3)  | 3082(3) | 4572(2) | 21(1) |
| C(19B) | 1106(3) | 2586(3) | 4920(2) | 23(1) |
| C(20B) | 758(3)  | 2032(3) | 5304(2) | 24(1) |
| C(21B) | -131(3) | 1945(3) | 5362(2) | 23(1) |
| C(22B) | -660(3) | 2389(3) | 5008(2) | 20(1) |
| C(23B) | -323(3) | 2962(3) | 4619(2) | 21(1) |
| C(24B) | -701(3) | 3512(3) | 4182(2) | 20(1) |
| C(25B) | 83(3)   | 6201(3) | 3901(2) | 22(1) |
| C(26B) | 717(3)  | 6029(3) | 4285(2) | 24(1) |
| C(27B) | 1130(3) | 6744(3) | 4537(2) | 23(1) |
| C(28B) | 934(3)  | 7601(3) | 4401(2) | 26(1) |
| C(29B) | 289(4)  | 7756(3) | 4015(2) | 32(1) |
| C(30B) | -139(3) | 7061(3) | 3772(2) | 28(1) |
| B(1B)  | -182(3) | 4670(3) | 3514(2) | 20(1) |

---

Table S 81. Bond lengths [Å] and angles [°] for *m*-IPhO-Cl<sub>6</sub>BsubPc (Chlorobenzene:Heptane; CCDC deposit 2087106).

---

|               |          |
|---------------|----------|
| I(1A)-C(27A)  | 2.088(5) |
| Cl(1A)-C(4A)  | 1.732(4) |
| Cl(2A)-C(5A)  | 1.727(5) |
| Cl(3A)-C(12A) | 1.726(5) |
| Cl(4A)-C(13A) | 1.740(5) |
| Cl(5A)-C(20A) | 1.726(4) |
| Cl(6A)-C(21A) | 1.727(4) |
| O(1A)-C(25A)  | 1.369(5) |
| O(1A)-B(1A)   | 1.425(6) |
| N(1A)-C(1A)   | 1.366(6) |
| N(1A)-C(8A)   | 1.366(5) |
| N(1A)-B(1A)   | 1.500(6) |
| N(2A)-C(8A)   | 1.340(6) |
| N(2A)-C(9A)   | 1.348(6) |
| N(3A)-C(9A)   | 1.369(5) |
| N(3A)-C(16A)  | 1.370(6) |
| N(3A)-B(1A)   | 1.509(6) |
| N(4A)-C(17A)  | 1.332(6) |
| N(4A)-C(16A)  | 1.334(6) |
| N(5A)-C(17A)  | 1.359(6) |
| N(5A)-C(24A)  | 1.376(5) |
| N(5A)-B(1A)   | 1.501(6) |
| N(6A)-C(24A)  | 1.336(6) |
| N(6A)-C(1A)   | 1.338(6) |
| C(1A)-C(2A)   | 1.453(6) |
| C(2A)-C(3A)   | 1.390(6) |
| C(2A)-C(7A)   | 1.423(7) |
| C(3A)-C(4A)   | 1.383(6) |
| C(3A)-H(3AA)  | 0.9500   |
| C(4A)-C(5A)   | 1.400(7) |
| C(5A)-C(6A)   | 1.395(7) |
| C(6A)-C(7A)   | 1.387(6) |

|               |          |
|---------------|----------|
| C(6A)-H(6AA)  | 0.9500   |
| C(7A)-C(8A)   | 1.465(6) |
| C(9A)-C(10A)  | 1.469(6) |
| C(10A)-C(11A) | 1.385(6) |
| C(10A)-C(15A) | 1.411(6) |
| C(11A)-C(12A) | 1.400(7) |
| C(11A)-H(11A) | 0.9500   |
| C(12A)-C(13A) | 1.395(7) |
| C(13A)-C(14A) | 1.381(7) |
| C(14A)-C(15A) | 1.405(6) |
| C(14A)-H(14A) | 0.9500   |
| C(15A)-C(16A) | 1.451(6) |
| C(17A)-C(18A) | 1.459(6) |
| C(18A)-C(19A) | 1.384(6) |
| C(18A)-C(23A) | 1.418(6) |
| C(19A)-C(20A) | 1.383(6) |
| C(19A)-H(19A) | 0.9500   |
| C(20A)-C(21A) | 1.415(6) |
| C(21A)-C(22A) | 1.383(7) |
| C(22A)-C(23A) | 1.397(6) |
| C(22A)-H(22A) | 0.9500   |
| C(23A)-C(24A) | 1.465(6) |
| C(25A)-C(26A) | 1.380(7) |
| C(25A)-C(30A) | 1.397(6) |
| C(26A)-C(27A) | 1.406(6) |
| C(26A)-H(26A) | 0.9500   |
| C(27A)-C(28A) | 1.377(7) |
| C(28A)-C(29A) | 1.392(7) |
| C(28A)-H(28A) | 0.9500   |
| C(29A)-C(30A) | 1.378(7) |
| C(29A)-H(29A) | 0.9500   |
| C(30A)-H(30A) | 0.9500   |
| I(1B)-C(27B)  | 2.079(5) |
| Cl(1B)-C(4B)  | 1.725(5) |
| Cl(2B)-C(5B)  | 1.711(5) |
| Cl(3B)-C(12B) | 1.718(5) |



|               |          |
|---------------|----------|
| Cl(4B)-C(13B) | 1.725(5) |
| Cl(5B)-C(20B) | 1.729(5) |
| Cl(6B)-C(21B) | 1.721(5) |
| O(1B)-C(25B)  | 1.375(6) |
| O(1B)-B(1B)   | 1.425(6) |
| N(1B)-C(1B)   | 1.358(6) |
| N(1B)-C(8B)   | 1.360(6) |
| N(1B)-B(1B)   | 1.504(6) |
| N(2B)-C(9B)   | 1.343(6) |
| N(2B)-C(8B)   | 1.349(6) |
| N(3B)-C(16B)  | 1.358(6) |
| N(3B)-C(9B)   | 1.363(5) |
| N(3B)-B(1B)   | 1.510(6) |
| N(4B)-C(16B)  | 1.348(6) |
| N(4B)-C(17B)  | 1.352(6) |
| N(5B)-C(24B)  | 1.363(6) |
| N(5B)-C(17B)  | 1.382(6) |
| N(5B)-B(1B)   | 1.493(6) |
| N(6B)-C(24B)  | 1.343(6) |
| N(6B)-C(1B)   | 1.348(6) |
| C(1B)-C(2B)   | 1.453(6) |
| C(2B)-C(3B)   | 1.385(6) |
| C(2B)-C(7B)   | 1.425(7) |
| C(3B)-C(4B)   | 1.383(6) |
| C(3B)-H(3BA)  | 0.9500   |
| C(4B)-C(5B)   | 1.414(7) |
| C(5B)-C(6B)   | 1.385(6) |
| C(6B)-C(7B)   | 1.381(7) |
| C(6B)-H(6BA)  | 0.9500   |
| C(7B)-C(8B)   | 1.458(6) |
| C(9B)-C(10B)  | 1.451(6) |
| C(10B)-C(11B) | 1.405(7) |
| C(10B)-C(15B) | 1.407(6) |
| C(11B)-C(12B) | 1.370(7) |
| C(11B)-H(11B) | 0.9500   |
| C(12B)-C(13B) | 1.422(7) |

|                     |          |
|---------------------|----------|
| C(13B)-C(14B)       | 1.378(7) |
| C(14B)-C(15B)       | 1.387(6) |
| C(14B)-H(14B)       | 0.9500   |
| C(15B)-C(16B)       | 1.462(7) |
| C(17B)-C(18B)       | 1.413(7) |
| C(18B)-C(19B)       | 1.414(6) |
| C(18B)-C(23B)       | 1.422(6) |
| C(19B)-C(20B)       | 1.360(7) |
| C(19B)-H(19B)       | 0.9500   |
| C(20B)-C(21B)       | 1.422(7) |
| C(21B)-C(22B)       | 1.367(7) |
| C(22B)-C(23B)       | 1.380(6) |
| C(22B)-H(22B)       | 0.9500   |
| C(23B)-C(24B)       | 1.463(6) |
| C(25B)-C(30B)       | 1.382(7) |
| C(25B)-C(26B)       | 1.387(7) |
| C(26B)-C(27B)       | 1.400(6) |
| C(26B)-H(26B)       | 0.9500   |
| C(27B)-C(28B)       | 1.372(7) |
| C(28B)-C(29B)       | 1.398(7) |
| C(28B)-H(28B)       | 0.9500   |
| C(29B)-C(30B)       | 1.378(7) |
| C(29B)-H(29B)       | 0.9500   |
| C(30B)-H(30B)       | 0.9500   |
|                     |          |
| C(25A)-O(1A)-B(1A)  | 128.4(4) |
| C(1A)-N(1A)-C(8A)   | 114.6(4) |
| C(1A)-N(1A)-B(1A)   | 122.0(4) |
| C(8A)-N(1A)-B(1A)   | 123.0(4) |
| C(8A)-N(2A)-C(9A)   | 116.5(4) |
| C(9A)-N(3A)-C(16A)  | 112.8(4) |
| C(9A)-N(3A)-B(1A)   | 122.1(4) |
| C(16A)-N(3A)-B(1A)  | 122.9(4) |
| C(17A)-N(4A)-C(16A) | 116.8(4) |
| C(17A)-N(5A)-C(24A) | 113.7(4) |
| C(17A)-N(5A)-B(1A)  | 123.7(4) |

|                      |          |
|----------------------|----------|
| C(24A)-N(5A)-B(1A)   | 121.7(4) |
| C(24A)-N(6A)-C(1A)   | 116.8(4) |
| N(6A)-C(1A)-N(1A)    | 122.9(4) |
| N(6A)-C(1A)-C(2A)    | 131.1(4) |
| N(1A)-C(1A)-C(2A)    | 104.8(4) |
| C(3A)-C(2A)-C(7A)    | 120.6(4) |
| C(3A)-C(2A)-C(1A)    | 131.9(4) |
| C(7A)-C(2A)-C(1A)    | 107.5(4) |
| C(4A)-C(3A)-C(2A)    | 117.9(4) |
| C(4A)-C(3A)-H(3AA)   | 121.0    |
| C(2A)-C(3A)-H(3AA)   | 121.0    |
| C(3A)-C(4A)-C(5A)    | 121.3(4) |
| C(3A)-C(4A)-Cl(1A)   | 118.8(4) |
| C(5A)-C(4A)-Cl(1A)   | 119.8(3) |
| C(6A)-C(5A)-C(4A)    | 121.3(4) |
| C(6A)-C(5A)-Cl(2A)   | 119.0(4) |
| C(4A)-C(5A)-Cl(2A)   | 119.6(3) |
| C(7A)-C(6A)-C(5A)    | 117.5(4) |
| C(7A)-C(6A)-H(6AA)   | 121.3    |
| C(5A)-C(6A)-H(6AA)   | 121.3    |
| C(6A)-C(7A)-C(2A)    | 121.0(4) |
| C(6A)-C(7A)-C(8A)    | 131.5(4) |
| C(2A)-C(7A)-C(8A)    | 107.5(4) |
| N(2A)-C(8A)-N(1A)    | 122.8(4) |
| N(2A)-C(8A)-C(7A)    | 131.7(4) |
| N(1A)-C(8A)-C(7A)    | 104.4(4) |
| N(2A)-C(9A)-N(3A)    | 123.4(4) |
| N(2A)-C(9A)-C(10A)   | 128.6(4) |
| N(3A)-C(9A)-C(10A)   | 105.5(4) |
| C(11A)-C(10A)-C(15A) | 121.4(4) |
| C(11A)-C(10A)-C(9A)  | 131.6(4) |
| C(15A)-C(10A)-C(9A)  | 106.6(4) |
| C(10A)-C(11A)-C(12A) | 117.3(4) |
| C(10A)-C(11A)-H(11A) | 121.4    |
| C(12A)-C(11A)-H(11A) | 121.4    |
| C(13A)-C(12A)-C(11A) | 121.1(4) |

|                      |          |
|----------------------|----------|
| C(13A)-C(12A)-Cl(3A) | 120.8(4) |
| C(11A)-C(12A)-Cl(3A) | 118.1(4) |
| C(14A)-C(13A)-C(12A) | 122.1(4) |
| C(14A)-C(13A)-Cl(4A) | 117.5(4) |
| C(12A)-C(13A)-Cl(4A) | 120.3(4) |
| C(13A)-C(14A)-C(15A) | 117.1(4) |
| C(13A)-C(14A)-H(14A) | 121.5    |
| C(15A)-C(14A)-H(14A) | 121.5    |
| C(14A)-C(15A)-C(10A) | 120.9(4) |
| C(14A)-C(15A)-C(16A) | 130.3(4) |
| C(10A)-C(15A)-C(16A) | 108.1(4) |
| N(4A)-C(16A)-N(3A)   | 123.4(4) |
| N(4A)-C(16A)-C(15A)  | 128.9(4) |
| N(3A)-C(16A)-C(15A)  | 105.5(4) |
| N(4A)-C(17A)-N(5A)   | 123.4(4) |
| N(4A)-C(17A)-C(18A)  | 129.8(4) |
| N(5A)-C(17A)-C(18A)  | 105.6(4) |
| C(19A)-C(18A)-C(23A) | 121.8(4) |
| C(19A)-C(18A)-C(17A) | 130.6(4) |
| C(23A)-C(18A)-C(17A) | 107.3(4) |
| C(20A)-C(19A)-C(18A) | 117.4(4) |
| C(20A)-C(19A)-H(19A) | 121.3    |
| C(18A)-C(19A)-H(19A) | 121.3    |
| C(19A)-C(20A)-C(21A) | 121.3(4) |
| C(19A)-C(20A)-Cl(5A) | 118.6(4) |
| C(21A)-C(20A)-Cl(5A) | 120.1(3) |
| C(22A)-C(21A)-C(20A) | 121.2(4) |
| C(22A)-C(21A)-Cl(6A) | 119.3(4) |
| C(20A)-C(21A)-Cl(6A) | 119.5(4) |
| C(21A)-C(22A)-C(23A) | 117.8(4) |
| C(21A)-C(22A)-H(22A) | 121.1    |
| C(23A)-C(22A)-H(22A) | 121.1    |
| C(22A)-C(23A)-C(18A) | 120.2(4) |
| C(22A)-C(23A)-C(24A) | 132.4(4) |
| C(18A)-C(23A)-C(24A) | 107.3(4) |
| N(6A)-C(24A)-N(5A)   | 122.6(4) |

|                      |          |
|----------------------|----------|
| N(6A)-C(24A)-C(23A)  | 130.6(4) |
| N(5A)-C(24A)-C(23A)  | 104.7(4) |
| O(1A)-C(25A)-C(26A)  | 124.2(4) |
| O(1A)-C(25A)-C(30A)  | 115.6(4) |
| C(26A)-C(25A)-C(30A) | 120.2(4) |
| C(25A)-C(26A)-C(27A) | 118.7(4) |
| C(25A)-C(26A)-H(26A) | 120.6    |
| C(27A)-C(26A)-H(26A) | 120.6    |
| C(28A)-C(27A)-C(26A) | 121.3(4) |
| C(28A)-C(27A)-I(1A)  | 119.3(3) |
| C(26A)-C(27A)-I(1A)  | 119.4(3) |
| C(27A)-C(28A)-C(29A) | 119.1(4) |
| C(27A)-C(28A)-H(28A) | 120.5    |
| C(29A)-C(28A)-H(28A) | 120.5    |
| C(30A)-C(29A)-C(28A) | 120.5(4) |
| C(30A)-C(29A)-H(29A) | 119.8    |
| C(28A)-C(29A)-H(29A) | 119.8    |
| C(29A)-C(30A)-C(25A) | 120.1(4) |
| C(29A)-C(30A)-H(30A) | 119.9    |
| C(25A)-C(30A)-H(30A) | 119.9    |
| O(1A)-B(1A)-N(1A)    | 107.8(4) |
| O(1A)-B(1A)-N(5A)    | 119.5(4) |
| N(1A)-B(1A)-N(5A)    | 102.7(3) |
| O(1A)-B(1A)-N(3A)    | 117.7(4) |
| N(1A)-B(1A)-N(3A)    | 103.6(3) |
| N(5A)-B(1A)-N(3A)    | 103.6(4) |
| C(25B)-O(1B)-B(1B)   | 129.0(4) |
| C(1B)-N(1B)-C(8B)    | 113.5(4) |
| C(1B)-N(1B)-B(1B)    | 123.2(4) |
| C(8B)-N(1B)-B(1B)    | 122.7(4) |
| C(9B)-N(2B)-C(8B)    | 116.7(4) |
| C(16B)-N(3B)-C(9B)   | 112.8(4) |
| C(16B)-N(3B)-B(1B)   | 123.2(4) |
| C(9B)-N(3B)-B(1B)    | 122.2(4) |
| C(16B)-N(4B)-C(17B)  | 117.6(4) |
| C(24B)-N(5B)-C(17B)  | 111.8(4) |

|                      |          |
|----------------------|----------|
| C(24B)-N(5B)-B(1B)   | 122.8(4) |
| C(17B)-N(5B)-B(1B)   | 124.0(4) |
| C(24B)-N(6B)-C(1B)   | 116.4(4) |
| N(6B)-C(1B)-N(1B)    | 122.1(4) |
| N(6B)-C(1B)-C(2B)    | 130.3(4) |
| N(1B)-C(1B)-C(2B)    | 106.0(4) |
| C(3B)-C(2B)-C(7B)    | 121.5(4) |
| C(3B)-C(2B)-C(1B)    | 131.9(4) |
| C(7B)-C(2B)-C(1B)    | 106.5(4) |
| C(4B)-C(3B)-C(2B)    | 117.4(4) |
| C(4B)-C(3B)-H(3BA)   | 121.3    |
| C(2B)-C(3B)-H(3BA)   | 121.3    |
| C(3B)-C(4B)-C(5B)    | 121.8(4) |
| C(3B)-C(4B)-Cl(1B)   | 119.1(4) |
| C(5B)-C(4B)-Cl(1B)   | 119.1(4) |
| C(6B)-C(5B)-C(4B)    | 120.3(4) |
| C(6B)-C(5B)-Cl(2B)   | 119.4(4) |
| C(4B)-C(5B)-Cl(2B)   | 120.3(4) |
| C(7B)-C(6B)-C(5B)    | 119.0(4) |
| C(7B)-C(6B)-H(6BA)   | 120.5    |
| C(5B)-C(6B)-H(6BA)   | 120.5    |
| C(6B)-C(7B)-C(2B)    | 120.0(4) |
| C(6B)-C(7B)-C(8B)    | 132.7(4) |
| C(2B)-C(7B)-C(8B)    | 107.3(4) |
| N(2B)-C(8B)-N(1B)    | 122.8(4) |
| N(2B)-C(8B)-C(7B)    | 130.5(4) |
| N(1B)-C(8B)-C(7B)    | 105.4(4) |
| N(2B)-C(9B)-N(3B)    | 123.4(4) |
| N(2B)-C(9B)-C(10B)   | 129.2(4) |
| N(3B)-C(9B)-C(10B)   | 105.5(4) |
| C(11B)-C(10B)-C(15B) | 120.5(4) |
| C(11B)-C(10B)-C(9B)  | 131.4(4) |
| C(15B)-C(10B)-C(9B)  | 107.8(4) |
| C(12B)-C(11B)-C(10B) | 118.2(4) |
| C(12B)-C(11B)-H(11B) | 120.9    |
| C(10B)-C(11B)-H(11B) | 120.9    |

|                      |          |
|----------------------|----------|
| C(11B)-C(12B)-C(13B) | 120.8(4) |
| C(11B)-C(12B)-Cl(3B) | 119.1(4) |
| C(13B)-C(12B)-Cl(3B) | 120.1(4) |
| C(14B)-C(13B)-C(12B) | 121.3(4) |
| C(14B)-C(13B)-Cl(4B) | 118.8(4) |
| C(12B)-C(13B)-Cl(4B) | 119.9(4) |
| C(13B)-C(14B)-C(15B) | 117.9(4) |
| C(13B)-C(14B)-H(14B) | 121.0    |
| C(15B)-C(14B)-H(14B) | 121.0    |
| C(14B)-C(15B)-C(10B) | 121.2(5) |
| C(14B)-C(15B)-C(16B) | 131.8(4) |
| C(10B)-C(15B)-C(16B) | 106.5(4) |
| N(4B)-C(16B)-N(3B)   | 122.8(4) |
| N(4B)-C(16B)-C(15B)  | 129.4(4) |
| N(3B)-C(16B)-C(15B)  | 105.8(4) |
| N(4B)-C(17B)-N(5B)   | 121.5(4) |
| N(4B)-C(17B)-C(18B)  | 131.1(4) |
| N(5B)-C(17B)-C(18B)  | 106.2(4) |
| C(17B)-C(18B)-C(19B) | 132.3(4) |
| C(17B)-C(18B)-C(23B) | 108.5(4) |
| C(19B)-C(18B)-C(23B) | 119.2(4) |
| C(20B)-C(19B)-C(18B) | 118.5(4) |
| C(20B)-C(19B)-H(19B) | 120.7    |
| C(18B)-C(19B)-H(19B) | 120.7    |
| C(19B)-C(20B)-C(21B) | 121.7(4) |
| C(19B)-C(20B)-Cl(5B) | 118.4(4) |
| C(21B)-C(20B)-Cl(5B) | 120.0(4) |
| C(22B)-C(21B)-C(20B) | 120.1(4) |
| C(22B)-C(21B)-Cl(6B) | 120.6(4) |
| C(20B)-C(21B)-Cl(6B) | 119.3(4) |
| C(21B)-C(22B)-C(23B) | 119.2(4) |
| C(21B)-C(22B)-H(22B) | 120.4    |
| C(23B)-C(22B)-H(22B) | 120.4    |
| C(22B)-C(23B)-C(18B) | 121.1(4) |
| C(22B)-C(23B)-C(24B) | 132.9(4) |
| C(18B)-C(23B)-C(24B) | 106.0(4) |

|                      |          |
|----------------------|----------|
| N(6B)-C(24B)-N(5B)   | 123.2(4) |
| N(6B)-C(24B)-C(23B)  | 129.6(4) |
| N(5B)-C(24B)-C(23B)  | 105.8(4) |
| O(1B)-C(25B)-C(30B)  | 115.0(4) |
| O(1B)-C(25B)-C(26B)  | 124.4(4) |
| C(30B)-C(25B)-C(26B) | 120.6(4) |
| C(25B)-C(26B)-C(27B) | 118.7(4) |
| C(25B)-C(26B)-H(26B) | 120.7    |
| C(27B)-C(26B)-H(26B) | 120.7    |
| C(28B)-C(27B)-C(26B) | 121.4(5) |
| C(28B)-C(27B)-I(1B)  | 118.2(3) |
| C(26B)-C(27B)-I(1B)  | 120.4(4) |
| C(27B)-C(28B)-C(29B) | 118.7(4) |
| C(27B)-C(28B)-H(28B) | 120.6    |
| C(29B)-C(28B)-H(28B) | 120.6    |
| C(30B)-C(29B)-C(28B) | 120.8(5) |
| C(30B)-C(29B)-H(29B) | 119.6    |
| C(28B)-C(29B)-H(29B) | 119.6    |
| C(29B)-C(30B)-C(25B) | 119.8(5) |
| C(29B)-C(30B)-H(30B) | 120.1    |
| C(25B)-C(30B)-H(30B) | 120.1    |
| O(1B)-B(1B)-N(5B)    | 119.9(4) |
| O(1B)-B(1B)-N(1B)    | 107.9(4) |
| N(5B)-B(1B)-N(1B)    | 102.8(4) |
| O(1B)-B(1B)-N(3B)    | 116.4(4) |
| N(5B)-B(1B)-N(3B)    | 104.0(4) |
| N(1B)-B(1B)-N(3B)    | 103.9(4) |

---

Symmetry transformations used to generate equivalent atoms:



Table S 82. Anisotropic displacement parameters ( $\text{\AA}^2 \times 10^3$ ) for *m*-IPhO-Cl<sub>6</sub>BsubPc (Chlorobenzene:Heptane; CCDC deposit 2087106). The anisotropic displacement factor exponent takes the form:  $-2\pi^2 [h^2 a^{*2} U^{11} + \dots + 2 h k a^* b^* U^{12}]$ .

|        | U <sup>11</sup> | U <sup>22</sup> | U <sup>33</sup> | U <sup>23</sup> | U <sup>13</sup> | U <sup>12</sup> |
|--------|-----------------|-----------------|-----------------|-----------------|-----------------|-----------------|
| I(1A)  | 26(1)           | 25(1)           | 23(1)           | 3(1)            | -6(1)           | 1(1)            |
| Cl(1A) | 18(1)           | 22(1)           | 31(1)           | 4(1)            | -2(1)           | 4(1)            |
| Cl(2A) | 25(1)           | 41(1)           | 23(1)           | 8(1)            | -7(1)           | 3(1)            |
| Cl(3A) | 40(1)           | 41(1)           | 21(1)           | 1(1)            | 10(1)           | -1(1)           |
| Cl(4A) | 26(1)           | 39(1)           | 35(1)           | -5(1)           | 11(1)           | -4(1)           |
| Cl(5A) | 31(1)           | 44(1)           | 28(1)           | -16(1)          | -7(1)           | -2(1)           |
| Cl(6A) | 39(1)           | 27(1)           | 19(1)           | -6(1)           | 5(1)            | 3(1)            |
| O(1A)  | 20(2)           | 16(2)           | 22(2)           | 5(1)            | -1(1)           | 2(1)            |
| N(1A)  | 19(2)           | 15(2)           | 14(2)           | 1(1)            | 0(1)            | 1(1)            |
| N(2A)  | 20(2)           | 17(2)           | 15(2)           | -2(1)           | -2(1)           | 0(1)            |
| N(3A)  | 18(2)           | 16(2)           | 16(2)           | -2(1)           | -1(1)           | 3(1)            |
| N(4A)  | 18(2)           | 19(2)           | 17(2)           | 2(1)            | -2(1)           | 4(1)            |
| N(5A)  | 19(2)           | 13(2)           | 14(2)           | 1(1)            | 1(1)            | 2(1)            |
| N(6A)  | 18(2)           | 17(2)           | 16(2)           | 2(1)            | 2(1)            | 2(1)            |
| C(1A)  | 16(2)           | 18(2)           | 18(2)           | 3(2)            | 1(2)            | -1(2)           |
| C(2A)  | 15(2)           | 16(2)           | 22(2)           | 5(2)            | -3(2)           | -4(2)           |
| C(3A)  | 18(2)           | 17(2)           | 18(2)           | 0(2)            | -1(2)           | -1(2)           |
| C(4A)  | 14(2)           | 14(2)           | 28(2)           | 4(2)            | -3(2)           | -2(2)           |
| C(5A)  | 21(2)           | 21(2)           | 17(2)           | 4(2)            | -4(2)           | -3(2)           |
| C(6A)  | 21(2)           | 20(2)           | 20(2)           | 3(2)            | -1(2)           | -4(2)           |
| C(7A)  | 19(2)           | 16(2)           | 18(2)           | 2(2)            | 1(2)            | -1(2)           |
| C(8A)  | 21(2)           | 13(2)           | 16(2)           | 1(2)            | -3(2)           | -2(2)           |
| C(9A)  | 24(2)           | 16(2)           | 14(2)           | 0(2)            | 2(2)            | 3(2)            |
| C(10A) | 21(2)           | 14(2)           | 17(2)           | -1(2)           | 1(2)            | 3(2)            |
| C(11A) | 25(2)           | 18(2)           | 19(2)           | -1(2)           | 0(2)            | 6(2)            |
| C(12A) | 30(3)           | 16(2)           | 22(2)           | 2(2)            | 7(2)            | 5(2)            |
| C(13A) | 20(2)           | 20(2)           | 29(3)           | -1(2)           | 7(2)            | 2(2)            |
| C(14A) | 18(2)           | 21(2)           | 27(2)           | -4(2)           | -1(2)           | 4(2)            |
| C(15A) | 19(2)           | 17(2)           | 20(2)           | 0(2)            | 4(2)            | 6(2)            |
| C(16A) | 17(2)           | 16(2)           | 19(2)           | -1(2)           | -1(2)           | 5(2)            |

|        |       |       |       |       |       |        |
|--------|-------|-------|-------|-------|-------|--------|
| C(17A) | 18(2) | 18(2) | 15(2) | 1(2)  | -4(2) | 3(2)   |
| C(18A) | 25(2) | 18(2) | 12(2) | 1(2)  | -2(2) | 5(2)   |
| C(19A) | 23(2) | 25(2) | 17(2) | 0(2)  | -4(2) | 5(2)   |
| C(20A) | 26(2) | 24(2) | 14(2) | -2(2) | -6(2) | 0(2)   |
| C(21A) | 31(2) | 19(2) | 14(2) | 2(2)  | 3(2)  | 4(2)   |
| C(22A) | 26(2) | 20(2) | 15(2) | 3(2)  | 2(2)  | 5(2)   |
| C(23A) | 21(2) | 18(2) | 13(2) | 3(2)  | 0(2)  | 1(2)   |
| C(24A) | 21(2) | 16(2) | 17(2) | 3(2)  | 2(2)  | 4(2)   |
| C(25A) | 17(2) | 17(2) | 20(2) | 4(2)  | 1(2)  | 4(2)   |
| C(26A) | 25(2) | 17(2) | 19(2) | 1(2)  | 2(2)  | 2(2)   |
| C(27A) | 22(2) | 23(2) | 20(2) | 3(2)  | -1(2) | 3(2)   |
| C(28A) | 27(2) | 20(2) | 35(3) | 9(2)  | -4(2) | 2(2)   |
| C(29A) | 31(3) | 15(2) | 37(3) | 0(2)  | -2(2) | -5(2)  |
| C(30A) | 22(2) | 19(2) | 26(2) | 2(2)  | 0(2)  | -1(2)  |
| B(1A)  | 21(2) | 15(2) | 16(2) | 1(2)  | 1(2)  | 4(2)   |
| I(1B)  | 24(1) | 40(1) | 28(1) | -5(1) | -4(1) | -3(1)  |
| Cl(1B) | 19(1) | 36(1) | 33(1) | 3(1)  | -3(1) | -6(1)  |
| Cl(2B) | 30(1) | 60(1) | 24(1) | 2(1)  | -8(1) | -16(1) |
| Cl(3B) | 27(1) | 53(1) | 26(1) | -4(1) | 6(1)  | -3(1)  |
| Cl(4B) | 19(1) | 38(1) | 38(1) | -1(1) | 3(1)  | 3(1)   |
| Cl(5B) | 32(1) | 39(1) | 31(1) | 12(1) | -3(1) | 6(1)   |
| Cl(6B) | 35(1) | 29(1) | 24(1) | 6(1)  | 6(1)  | -1(1)  |
| O(1B)  | 23(2) | 23(2) | 27(2) | -5(1) | -4(1) | -1(1)  |
| N(1B)  | 20(2) | 20(2) | 18(2) | -1(1) | -2(1) | 2(1)   |
| N(2B)  | 20(2) | 20(2) | 21(2) | 1(1)  | -1(1) | -1(1)  |
| N(3B)  | 21(2) | 18(2) | 18(2) | 0(1)  | -2(2) | -2(1)  |
| N(4B)  | 21(2) | 20(2) | 18(2) | 1(1)  | -3(2) | -4(2)  |
| N(5B)  | 19(2) | 20(2) | 19(2) | -3(1) | -1(1) | -1(1)  |
| N(6B)  | 21(2) | 23(2) | 19(2) | -3(2) | 2(2)  | 2(2)   |
| C(1B)  | 21(2) | 18(2) | 20(2) | -1(2) | -1(2) | 3(2)   |
| C(2B)  | 20(2) | 19(2) | 23(2) | 0(2)  | -1(2) | 6(2)   |
| C(3B)  | 18(2) | 23(2) | 19(2) | 2(2)  | 0(2)  | 1(2)   |
| C(4B)  | 19(2) | 19(2) | 27(2) | 2(2)  | -2(2) | -2(2)  |
| C(5B)  | 24(2) | 24(2) | 18(2) | 0(2)  | -5(2) | 0(2)   |
| C(6B)  | 16(2) | 23(2) | 23(2) | -3(2) | 3(2)  | 1(2)   |
| C(7B)  | 18(2) | 18(2) | 23(2) | 1(2)  | -2(2) | 1(2)   |

|        |       |       |       |        |       |       |
|--------|-------|-------|-------|--------|-------|-------|
| C(8B)  | 21(2) | 19(2) | 18(2) | 1(2)   | -4(2) | 4(2)  |
| C(9B)  | 25(2) | 14(2) | 18(2) | 2(2)   | -1(2) | -4(2) |
| C(10B) | 20(2) | 16(2) | 23(2) | 1(2)   | -3(2) | -4(2) |
| C(11B) | 25(2) | 19(2) | 23(2) | -1(2)  | -1(2) | -8(2) |
| C(12B) | 23(2) | 20(2) | 23(2) | -1(2)  | 4(2)  | -6(2) |
| C(13B) | 16(2) | 20(2) | 38(3) | -1(2)  | 3(2)  | -4(2) |
| C(14B) | 17(2) | 16(2) | 26(2) | 2(2)   | -3(2) | -2(2) |
| C(15B) | 22(2) | 18(2) | 22(2) | 3(2)   | -4(2) | -5(2) |
| C(16B) | 20(2) | 17(2) | 24(2) | -2(2)  | -2(2) | -3(2) |
| C(17B) | 19(2) | 34(2) | 16(2) | -11(2) | -5(2) | 8(2)  |
| C(18B) | 16(2) | 16(2) | 32(2) | -7(2)  | 3(2)  | 0(2)  |
| C(19B) | 25(2) | 24(2) | 20(2) | -4(2)  | -4(2) | 0(2)  |
| C(20B) | 29(2) | 20(2) | 23(2) | -3(2)  | -6(2) | 4(2)  |
| C(21B) | 28(2) | 20(2) | 21(2) | -1(2)  | 5(2)  | 1(2)  |
| C(22B) | 23(2) | 21(2) | 17(2) | -5(2)  | 1(2)  | 0(2)  |
| C(23B) | 23(2) | 20(2) | 20(2) | -3(2)  | -2(2) | 0(2)  |
| C(24B) | 26(2) | 17(2) | 17(2) | -1(2)  | 5(2)  | 0(2)  |
| C(25B) | 26(2) | 21(2) | 19(2) | -5(2)  | 5(2)  | -5(2) |
| C(26B) | 26(2) | 17(2) | 28(2) | -4(2)  | 5(2)  | -2(2) |
| C(27B) | 22(2) | 26(2) | 21(2) | -2(2)  | 4(2)  | -1(2) |
| C(28B) | 30(2) | 21(2) | 28(2) | -6(2)  | 4(2)  | -8(2) |
| C(29B) | 40(3) | 21(2) | 34(3) | -2(2)  | -4(2) | -3(2) |
| C(30B) | 36(3) | 23(2) | 23(2) | -1(2)  | -2(2) | -5(2) |
| B(1B)  | 16(2) | 24(2) | 19(2) | -1(2)  | -1(2) | -1(2) |

---

Table S 83. Hydrogen coordinates ( $\times 10^4$ ) and isotropic displacement parameters ( $\text{\AA}^2 \times 10^{-3}$ ) for *m*-IPhO-Cl<sub>6</sub>BsubPc (Chlorobenzene:Heptane; CCDC deposit 2087106).

|        | x     | y    | z    | U(eq) |
|--------|-------|------|------|-------|
| H(3AA) | 7939  | 375  | 6273 | 21    |
| H(6AA) | 6989  | 1294 | 8061 | 24    |
| H(11A) | 3866  | 2029 | 8402 | 25    |
| H(14A) | 1917  | 1488 | 6931 | 26    |
| H(19A) | 2865  | 423  | 5097 | 26    |
| H(22A) | 5752  | -15  | 4640 | 24    |
| H(26A) | 4136  | 3010 | 5413 | 24    |
| H(28A) | 3879  | 5645 | 5107 | 33    |
| H(29A) | 5005  | 5933 | 5716 | 33    |
| H(30A) | 5653  | 4781 | 6196 | 27    |
| H(3BA) | -3146 | 2977 | 3305 | 24    |
| H(6BA) | -1843 | 3895 | 1618 | 25    |
| H(11B) | 1348  | 4402 | 1512 | 27    |
| H(14B) | 3055  | 3803 | 3095 | 23    |
| H(19B) | 1701  | 2638 | 4887 | 27    |
| H(22B) | -1252 | 2303 | 5031 | 24    |
| H(26B) | 869   | 5438 | 4375 | 29    |
| H(28B) | 1230  | 8081 | 4566 | 32    |
| H(29B) | 144   | 8346 | 3918 | 38    |
| H(30B) | -585  | 7174 | 3516 | 33    |

Table S 84. Torsion angles [°] for *m*-IPhO-Cl<sub>6</sub>BsubPc (Chlorobenzene:Heptane; CCDC deposit 2087106).

---

|                           |           |
|---------------------------|-----------|
| C(24A)-N(6A)-C(1A)-N(1A)  | -8.5(6)   |
| C(24A)-N(6A)-C(1A)-C(2A)  | 157.1(4)  |
| C(8A)-N(1A)-C(1A)-N(6A)   | 157.2(4)  |
| B(1A)-N(1A)-C(1A)-N(6A)   | -16.0(6)  |
| C(8A)-N(1A)-C(1A)-C(2A)   | -11.7(5)  |
| B(1A)-N(1A)-C(1A)-C(2A)   | 175.1(4)  |
| N(6A)-C(1A)-C(2A)-C(3A)   | 18.4(8)   |
| N(1A)-C(1A)-C(2A)-C(3A)   | -174.1(4) |
| N(6A)-C(1A)-C(2A)-C(7A)   | -160.0(4) |
| N(1A)-C(1A)-C(2A)-C(7A)   | 7.6(5)    |
| C(7A)-C(2A)-C(3A)-C(4A)   | -3.7(6)   |
| C(1A)-C(2A)-C(3A)-C(4A)   | 178.1(4)  |
| C(2A)-C(3A)-C(4A)-C(5A)   | 6.0(6)    |
| C(2A)-C(3A)-C(4A)-Cl(1A)  | -172.5(3) |
| C(3A)-C(4A)-C(5A)-C(6A)   | -3.2(7)   |
| Cl(1A)-C(4A)-C(5A)-C(6A)  | 175.3(4)  |
| C(3A)-C(4A)-C(5A)-Cl(2A)  | 178.1(3)  |
| Cl(1A)-C(4A)-C(5A)-Cl(2A) | -3.4(5)   |
| C(4A)-C(5A)-C(6A)-C(7A)   | -2.1(7)   |
| Cl(2A)-C(5A)-C(6A)-C(7A)  | 176.6(3)  |
| C(5A)-C(6A)-C(7A)-C(2A)   | 4.4(6)    |
| C(5A)-C(6A)-C(7A)-C(8A)   | -177.4(4) |
| C(3A)-C(2A)-C(7A)-C(6A)   | -1.5(6)   |
| C(1A)-C(2A)-C(7A)-C(6A)   | 177.0(4)  |
| C(3A)-C(2A)-C(7A)-C(8A)   | 179.8(4)  |
| C(1A)-C(2A)-C(7A)-C(8A)   | -1.6(5)   |
| C(9A)-N(2A)-C(8A)-N(1A)   | 8.0(6)    |
| C(9A)-N(2A)-C(8A)-C(7A)   | -158.2(4) |
| C(1A)-N(1A)-C(8A)-N(2A)   | -158.7(4) |
| B(1A)-N(1A)-C(8A)-N(2A)   | 14.4(6)   |
| C(1A)-N(1A)-C(8A)-C(7A)   | 10.7(5)   |
| B(1A)-N(1A)-C(8A)-C(7A)   | -176.2(4) |
| C(6A)-C(7A)-C(8A)-N(2A)   | -15.5(8)  |

|                             |           |
|-----------------------------|-----------|
| C(2A)-C(7A)-C(8A)-N(2A)     | 163.0(4)  |
| C(6A)-C(7A)-C(8A)-N(1A)     | 176.5(5)  |
| C(2A)-C(7A)-C(8A)-N(1A)     | -5.0(5)   |
| C(8A)-N(2A)-C(9A)-N(3A)     | -8.5(6)   |
| C(8A)-N(2A)-C(9A)-C(10A)    | 150.6(4)  |
| C(16A)-N(3A)-C(9A)-N(2A)    | 150.4(4)  |
| B(1A)-N(3A)-C(9A)-N(2A)     | -13.1(6)  |
| C(16A)-N(3A)-C(9A)-C(10A)   | -12.8(5)  |
| B(1A)-N(3A)-C(9A)-C(10A)    | -176.3(4) |
| N(2A)-C(9A)-C(10A)-C(11A)   | 18.3(8)   |
| N(3A)-C(9A)-C(10A)-C(11A)   | -179.7(4) |
| N(2A)-C(9A)-C(10A)-C(15A)   | -154.2(4) |
| N(3A)-C(9A)-C(10A)-C(15A)   | 7.8(5)    |
| C(15A)-C(10A)-C(11A)-C(12A) | 0.4(6)    |
| C(9A)-C(10A)-C(11A)-C(12A)  | -171.1(4) |
| C(10A)-C(11A)-C(12A)-C(13A) | 2.2(6)    |
| C(10A)-C(11A)-C(12A)-Cl(3A) | -179.0(3) |
| C(11A)-C(12A)-C(13A)-C(14A) | -2.9(7)   |
| Cl(3A)-C(12A)-C(13A)-C(14A) | 178.4(4)  |
| C(11A)-C(12A)-C(13A)-Cl(4A) | 176.0(3)  |
| Cl(3A)-C(12A)-C(13A)-Cl(4A) | -2.7(5)   |
| C(12A)-C(13A)-C(14A)-C(15A) | 0.7(7)    |
| Cl(4A)-C(13A)-C(14A)-C(15A) | -178.2(3) |
| C(13A)-C(14A)-C(15A)-C(10A) | 1.9(6)    |
| C(13A)-C(14A)-C(15A)-C(16A) | 171.3(4)  |
| C(11A)-C(10A)-C(15A)-C(14A) | -2.5(6)   |
| C(9A)-C(10A)-C(15A)-C(14A)  | 170.8(4)  |
| C(11A)-C(10A)-C(15A)-C(16A) | -174.0(4) |
| C(9A)-C(10A)-C(15A)-C(16A)  | -0.7(5)   |
| C(17A)-N(4A)-C(16A)-N(3A)   | 7.5(6)    |
| C(17A)-N(4A)-C(16A)-C(15A)  | -153.4(4) |
| C(9A)-N(3A)-C(16A)-N(4A)    | -152.2(4) |
| B(1A)-N(3A)-C(16A)-N(4A)    | 11.1(6)   |
| C(9A)-N(3A)-C(16A)-C(15A)   | 12.4(5)   |
| B(1A)-N(3A)-C(16A)-C(15A)   | 175.8(4)  |
| C(14A)-C(15A)-C(16A)-N(4A)  | -13.7(8)  |

|                             |           |
|-----------------------------|-----------|
| C(10A)-C(15A)-C(16A)-N(4A)  | 156.7(4)  |
| C(14A)-C(15A)-C(16A)-N(3A)  | -177.2(4) |
| C(10A)-C(15A)-C(16A)-N(3A)  | -6.7(5)   |
| C(16A)-N(4A)-C(17A)-N(5A)   | -7.0(6)   |
| C(16A)-N(4A)-C(17A)-C(18A)  | 158.1(4)  |
| C(24A)-N(5A)-C(17A)-N(4A)   | 156.9(4)  |
| B(1A)-N(5A)-C(17A)-N(4A)    | -12.3(6)  |
| C(24A)-N(5A)-C(17A)-C(18A)  | -11.3(5)  |
| B(1A)-N(5A)-C(17A)-C(18A)   | 179.5(4)  |
| N(4A)-C(17A)-C(18A)-C(19A)  | 12.1(8)   |
| N(5A)-C(17A)-C(18A)-C(19A)  | 179.3(4)  |
| N(4A)-C(17A)-C(18A)-C(23A)  | -162.2(4) |
| N(5A)-C(17A)-C(18A)-C(23A)  | 5.0(5)    |
| C(23A)-C(18A)-C(19A)-C(20A) | -3.8(6)   |
| C(17A)-C(18A)-C(19A)-C(20A) | -177.4(4) |
| C(18A)-C(19A)-C(20A)-C(21A) | -0.8(7)   |
| C(18A)-C(19A)-C(20A)-Cl(5A) | 178.5(3)  |
| C(19A)-C(20A)-C(21A)-C(22A) | 5.1(7)    |
| Cl(5A)-C(20A)-C(21A)-C(22A) | -174.2(3) |
| C(19A)-C(20A)-C(21A)-Cl(6A) | -173.9(3) |
| Cl(5A)-C(20A)-C(21A)-Cl(6A) | 6.8(5)    |
| C(20A)-C(21A)-C(22A)-C(23A) | -4.4(6)   |
| Cl(6A)-C(21A)-C(22A)-C(23A) | 174.6(3)  |
| C(21A)-C(22A)-C(23A)-C(18A) | -0.2(6)   |
| C(21A)-C(22A)-C(23A)-C(24A) | 175.8(4)  |
| C(19A)-C(18A)-C(23A)-C(22A) | 4.4(6)    |
| C(17A)-C(18A)-C(23A)-C(22A) | 179.3(4)  |
| C(19A)-C(18A)-C(23A)-C(24A) | -172.5(4) |
| C(17A)-C(18A)-C(23A)-C(24A) | 2.4(5)    |
| C(1A)-N(6A)-C(24A)-N(5A)    | 8.0(6)    |
| C(1A)-N(6A)-C(24A)-C(23A)   | -153.0(4) |
| C(17A)-N(5A)-C(24A)-N(6A)   | -152.5(4) |
| B(1A)-N(5A)-C(24A)-N(6A)    | 16.9(6)   |
| C(17A)-N(5A)-C(24A)-C(23A)  | 12.7(5)   |
| B(1A)-N(5A)-C(24A)-C(23A)   | -177.9(4) |
| C(22A)-C(23A)-C(24A)-N(6A)  | -21.6(8)  |

|                             |           |
|-----------------------------|-----------|
| C(18A)-C(23A)-C(24A)-N(6A)  | 154.8(4)  |
| C(22A)-C(23A)-C(24A)-N(5A)  | 174.9(4)  |
| C(18A)-C(23A)-C(24A)-N(5A)  | -8.7(5)   |
| B(1A)-O(1A)-C(25A)-C(26A)   | -23.2(7)  |
| B(1A)-O(1A)-C(25A)-C(30A)   | 158.0(4)  |
| O(1A)-C(25A)-C(26A)-C(27A)  | 179.3(4)  |
| C(30A)-C(25A)-C(26A)-C(27A) | -1.9(7)   |
| C(25A)-C(26A)-C(27A)-C(28A) | 0.3(7)    |
| C(25A)-C(26A)-C(27A)-I(1A)  | 178.5(3)  |
| C(26A)-C(27A)-C(28A)-C(29A) | 1.7(8)    |
| I(1A)-C(27A)-C(28A)-C(29A)  | -176.4(4) |
| C(27A)-C(28A)-C(29A)-C(30A) | -2.2(8)   |
| C(28A)-C(29A)-C(30A)-C(25A) | 0.7(8)    |
| O(1A)-C(25A)-C(30A)-C(29A)  | -179.7(4) |
| C(26A)-C(25A)-C(30A)-C(29A) | 1.4(7)    |
| C(25A)-O(1A)-B(1A)-N(1A)    | 173.4(4)  |
| C(25A)-O(1A)-B(1A)-N(5A)    | 56.9(6)   |
| C(25A)-O(1A)-B(1A)-N(3A)    | -70.0(6)  |
| C(1A)-N(1A)-B(1A)-O(1A)     | -92.5(5)  |
| C(8A)-N(1A)-B(1A)-O(1A)     | 94.9(5)   |
| C(1A)-N(1A)-B(1A)-N(5A)     | 34.5(5)   |
| C(8A)-N(1A)-B(1A)-N(5A)     | -138.1(4) |
| C(1A)-N(1A)-B(1A)-N(3A)     | 142.0(4)  |
| C(8A)-N(1A)-B(1A)-N(3A)     | -30.6(5)  |
| C(17A)-N(5A)-B(1A)-O(1A)    | -107.4(5) |
| C(24A)-N(5A)-B(1A)-O(1A)    | 84.3(5)   |
| C(17A)-N(5A)-B(1A)-N(1A)    | 133.5(4)  |
| C(24A)-N(5A)-B(1A)-N(1A)    | -34.8(5)  |
| C(17A)-N(5A)-B(1A)-N(3A)    | 25.9(5)   |
| C(24A)-N(5A)-B(1A)-N(3A)    | -142.4(4) |
| C(9A)-N(3A)-B(1A)-O(1A)     | -89.1(5)  |
| C(16A)-N(3A)-B(1A)-O(1A)    | 109.1(5)  |
| C(9A)-N(3A)-B(1A)-N(1A)     | 29.7(5)   |
| C(16A)-N(3A)-B(1A)-N(1A)    | -132.1(4) |
| C(9A)-N(3A)-B(1A)-N(5A)     | 136.6(4)  |
| C(16A)-N(3A)-B(1A)-N(5A)    | -25.2(5)  |



|                           |           |
|---------------------------|-----------|
| C(24B)-N(6B)-C(1B)-N(1B)  | -7.3(6)   |
| C(24B)-N(6B)-C(1B)-C(2B)  | 156.1(5)  |
| C(8B)-N(1B)-C(1B)-N(6B)   | 154.7(4)  |
| B(1B)-N(1B)-C(1B)-N(6B)   | -16.9(7)  |
| C(8B)-N(1B)-C(1B)-C(2B)   | -12.1(5)  |
| B(1B)-N(1B)-C(1B)-C(2B)   | 176.2(4)  |
| N(6B)-C(1B)-C(2B)-C(3B)   | 19.3(8)   |
| N(1B)-C(1B)-C(2B)-C(3B)   | -175.3(5) |
| N(6B)-C(1B)-C(2B)-C(7B)   | -157.5(5) |
| N(1B)-C(1B)-C(2B)-C(7B)   | 8.0(5)    |
| C(7B)-C(2B)-C(3B)-C(4B)   | -0.9(7)   |
| C(1B)-C(2B)-C(3B)-C(4B)   | -177.3(5) |
| C(2B)-C(3B)-C(4B)-C(5B)   | 1.0(7)    |
| C(2B)-C(3B)-C(4B)-Cl(1B)  | 178.4(3)  |
| C(3B)-C(4B)-C(5B)-C(6B)   | 0.3(7)    |
| Cl(1B)-C(4B)-C(5B)-C(6B)  | -177.0(4) |
| C(3B)-C(4B)-C(5B)-Cl(2B)  | -178.3(4) |
| Cl(1B)-C(4B)-C(5B)-Cl(2B) | 4.3(6)    |
| C(4B)-C(5B)-C(6B)-C(7B)   | -1.8(7)   |
| Cl(2B)-C(5B)-C(6B)-C(7B)  | 176.9(4)  |
| C(5B)-C(6B)-C(7B)-C(2B)   | 1.9(7)    |
| C(5B)-C(6B)-C(7B)-C(8B)   | 179.6(5)  |
| C(3B)-C(2B)-C(7B)-C(6B)   | -0.6(7)   |
| C(1B)-C(2B)-C(7B)-C(6B)   | 176.6(4)  |
| C(3B)-C(2B)-C(7B)-C(8B)   | -178.8(4) |
| C(1B)-C(2B)-C(7B)-C(8B)   | -1.6(5)   |
| C(9B)-N(2B)-C(8B)-N(1B)   | 7.0(6)    |
| C(9B)-N(2B)-C(8B)-C(7B)   | -157.7(4) |
| C(1B)-N(1B)-C(8B)-N(2B)   | -157.0(4) |
| B(1B)-N(1B)-C(8B)-N(2B)   | 14.7(7)   |
| C(1B)-N(1B)-C(8B)-C(7B)   | 11.0(5)   |
| B(1B)-N(1B)-C(8B)-C(7B)   | -177.3(4) |
| C(6B)-C(7B)-C(8B)-N(2B)   | -16.4(8)  |
| C(2B)-C(7B)-C(8B)-N(2B)   | 161.5(4)  |
| C(6B)-C(7B)-C(8B)-N(1B)   | 176.8(5)  |
| C(2B)-C(7B)-C(8B)-N(1B)   | -5.3(5)   |

|                             |           |
|-----------------------------|-----------|
| C(8B)-N(2B)-C(9B)-N(3B)     | -7.9(6)   |
| C(8B)-N(2B)-C(9B)-C(10B)    | 154.1(4)  |
| C(16B)-N(3B)-C(9B)-N(2B)    | 152.6(4)  |
| B(1B)-N(3B)-C(9B)-N(2B)     | -12.7(6)  |
| C(16B)-N(3B)-C(9B)-C(10B)   | -13.0(5)  |
| B(1B)-N(3B)-C(9B)-C(10B)    | -178.4(4) |
| N(2B)-C(9B)-C(10B)-C(11B)   | 16.5(8)   |
| N(3B)-C(9B)-C(10B)-C(11B)   | -179.0(5) |
| N(2B)-C(9B)-C(10B)-C(15B)   | -157.1(4) |
| N(3B)-C(9B)-C(10B)-C(15B)   | 7.4(5)    |
| C(15B)-C(10B)-C(11B)-C(12B) | 1.0(6)    |
| C(9B)-C(10B)-C(11B)-C(12B)  | -172.0(4) |
| C(10B)-C(11B)-C(12B)-C(13B) | -0.4(7)   |
| C(10B)-C(11B)-C(12B)-Cl(3B) | 179.3(3)  |
| C(11B)-C(12B)-C(13B)-C(14B) | -0.3(7)   |
| Cl(3B)-C(12B)-C(13B)-C(14B) | -179.9(4) |
| C(11B)-C(12B)-C(13B)-Cl(4B) | 178.6(3)  |
| Cl(3B)-C(12B)-C(13B)-Cl(4B) | -1.0(5)   |
| C(12B)-C(13B)-C(14B)-C(15B) | 0.3(7)    |
| Cl(4B)-C(13B)-C(14B)-C(15B) | -178.7(3) |
| C(13B)-C(14B)-C(15B)-C(10B) | 0.4(7)    |
| C(13B)-C(14B)-C(15B)-C(16B) | 171.7(5)  |
| C(11B)-C(10B)-C(15B)-C(14B) | -1.1(7)   |
| C(9B)-C(10B)-C(15B)-C(14B)  | 173.4(4)  |
| C(11B)-C(10B)-C(15B)-C(16B) | -174.3(4) |
| C(9B)-C(10B)-C(15B)-C(16B)  | 0.2(5)    |
| C(17B)-N(4B)-C(16B)-N(3B)   | 7.8(6)    |
| C(17B)-N(4B)-C(16B)-C(15B)  | -153.4(5) |
| C(9B)-N(3B)-C(16B)-N(4B)    | -151.9(4) |
| B(1B)-N(3B)-C(16B)-N(4B)    | 13.3(7)   |
| C(9B)-N(3B)-C(16B)-C(15B)   | 13.2(5)   |
| B(1B)-N(3B)-C(16B)-C(15B)   | 178.3(4)  |
| C(14B)-C(15B)-C(16B)-N(4B)  | -16.2(8)  |
| C(10B)-C(15B)-C(16B)-N(4B)  | 156.0(5)  |
| C(14B)-C(15B)-C(16B)-N(3B)  | -179.9(5) |
| C(10B)-C(15B)-C(16B)-N(3B)  | -7.7(5)   |

|                             |           |
|-----------------------------|-----------|
| C(16B)-N(4B)-C(17B)-N(5B)   | -9.3(6)   |
| C(16B)-N(4B)-C(17B)-C(18B)  | 156.3(5)  |
| C(24B)-N(5B)-C(17B)-N(4B)   | 156.0(4)  |
| B(1B)-N(5B)-C(17B)-N(4B)    | -10.4(7)  |
| C(24B)-N(5B)-C(17B)-C(18B)  | -12.8(5)  |
| B(1B)-N(5B)-C(17B)-C(18B)   | -179.1(4) |
| N(4B)-C(17B)-C(18B)-C(19B)  | 16.4(8)   |
| N(5B)-C(17B)-C(18B)-C(19B)  | -176.4(5) |
| N(4B)-C(17B)-C(18B)-C(23B)  | -160.9(5) |
| N(5B)-C(17B)-C(18B)-C(23B)  | 6.3(5)    |
| C(17B)-C(18B)-C(19B)-C(20B) | -179.5(5) |
| C(23B)-C(18B)-C(19B)-C(20B) | -2.4(6)   |
| C(18B)-C(19B)-C(20B)-C(21B) | -0.2(7)   |
| C(18B)-C(19B)-C(20B)-Cl(5B) | 179.1(3)  |
| C(19B)-C(20B)-C(21B)-C(22B) | 3.5(7)    |
| Cl(5B)-C(20B)-C(21B)-C(22B) | -175.8(3) |
| C(19B)-C(20B)-C(21B)-Cl(6B) | -177.2(4) |
| Cl(5B)-C(20B)-C(21B)-Cl(6B) | 3.5(5)    |
| C(20B)-C(21B)-C(22B)-C(23B) | -4.0(7)   |
| Cl(6B)-C(21B)-C(22B)-C(23B) | 176.7(3)  |
| C(21B)-C(22B)-C(23B)-C(18B) | 1.4(7)    |
| C(21B)-C(22B)-C(23B)-C(24B) | 178.6(5)  |
| C(17B)-C(18B)-C(23B)-C(22B) | 179.6(4)  |
| C(19B)-C(18B)-C(23B)-C(22B) | 1.8(7)    |
| C(17B)-C(18B)-C(23B)-C(24B) | 1.7(5)    |
| C(19B)-C(18B)-C(23B)-C(24B) | -176.1(4) |
| C(1B)-N(6B)-C(24B)-N(5B)    | 9.5(6)    |
| C(1B)-N(6B)-C(24B)-C(23B)   | -155.1(5) |
| C(17B)-N(5B)-C(24B)-N(6B)   | -154.0(4) |
| B(1B)-N(5B)-C(24B)-N(6B)    | 12.5(6)   |
| C(17B)-N(5B)-C(24B)-C(23B)  | 13.7(5)   |
| B(1B)-N(5B)-C(24B)-C(23B)   | -179.7(4) |
| C(22B)-C(23B)-C(24B)-N(6B)  | -20.0(8)  |
| C(18B)-C(23B)-C(24B)-N(6B)  | 157.6(4)  |
| C(22B)-C(23B)-C(24B)-N(5B)  | 173.4(5)  |
| C(18B)-C(23B)-C(24B)-N(5B)  | -9.1(5)   |

|                             |           |
|-----------------------------|-----------|
| B(1B)-O(1B)-C(25B)-C(30B)   | 154.3(5)  |
| B(1B)-O(1B)-C(25B)-C(26B)   | -29.2(7)  |
| O(1B)-C(25B)-C(26B)-C(27B)  | -176.5(4) |
| C(30B)-C(25B)-C(26B)-C(27B) | -0.2(7)   |
| C(25B)-C(26B)-C(27B)-C(28B) | -1.7(7)   |
| C(25B)-C(26B)-C(27B)-I(1B)  | 176.0(3)  |
| C(26B)-C(27B)-C(28B)-C(29B) | 2.0(7)    |
| I(1B)-C(27B)-C(28B)-C(29B)  | -175.7(4) |
| C(27B)-C(28B)-C(29B)-C(30B) | -0.3(8)   |
| C(28B)-C(29B)-C(30B)-C(25B) | -1.5(8)   |
| O(1B)-C(25B)-C(30B)-C(29B)  | 178.4(5)  |
| C(26B)-C(25B)-C(30B)-C(29B) | 1.8(8)    |
| C(25B)-O(1B)-B(1B)-N(5B)    | 68.9(6)   |
| C(25B)-O(1B)-B(1B)-N(1B)    | -174.0(4) |
| C(25B)-O(1B)-B(1B)-N(3B)    | -57.7(6)  |
| C(24B)-N(5B)-B(1B)-O(1B)    | 89.2(5)   |
| C(17B)-N(5B)-B(1B)-O(1B)    | -105.9(5) |
| C(24B)-N(5B)-B(1B)-N(1B)    | -30.5(5)  |
| C(17B)-N(5B)-B(1B)-N(1B)    | 134.4(4)  |
| C(24B)-N(5B)-B(1B)-N(3B)    | -138.6(4) |
| C(17B)-N(5B)-B(1B)-N(3B)    | 26.4(5)   |
| C(1B)-N(1B)-B(1B)-O(1B)     | -94.9(5)  |
| C(8B)-N(1B)-B(1B)-O(1B)     | 94.3(5)   |
| C(1B)-N(1B)-B(1B)-N(5B)     | 32.8(5)   |
| C(8B)-N(1B)-B(1B)-N(5B)     | -138.0(4) |
| C(1B)-N(1B)-B(1B)-N(3B)     | 140.9(4)  |
| C(8B)-N(1B)-B(1B)-N(3B)     | -29.9(6)  |
| C(16B)-N(3B)-B(1B)-O(1B)    | 106.6(5)  |
| C(9B)-N(3B)-B(1B)-O(1B)     | -89.6(5)  |
| C(16B)-N(3B)-B(1B)-N(5B)    | -27.7(5)  |
| C(9B)-N(3B)-B(1B)-N(5B)     | 136.1(4)  |
| C(16B)-N(3B)-B(1B)-N(1B)    | -134.9(4) |
| C(9B)-N(3B)-B(1B)-N(1B)     | 28.9(5)   |

---

Symmetry transformations used to generate equivalent atoms:

a)

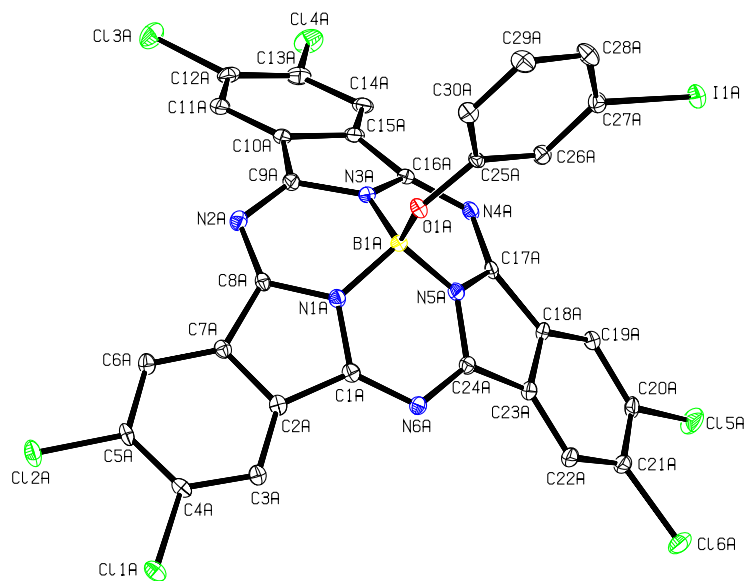

b)

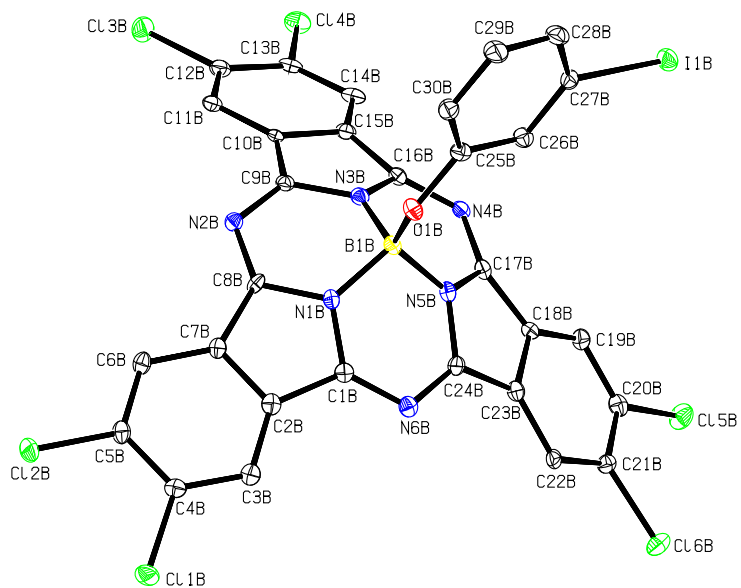

Figure S43: Anisotropic displacement ellipsoid plots of individual co-crystals of *m*-IPhO-Cl<sub>6</sub>BsubPc (Dichlorobenzene:Heptane; CCDC deposit 2087107).

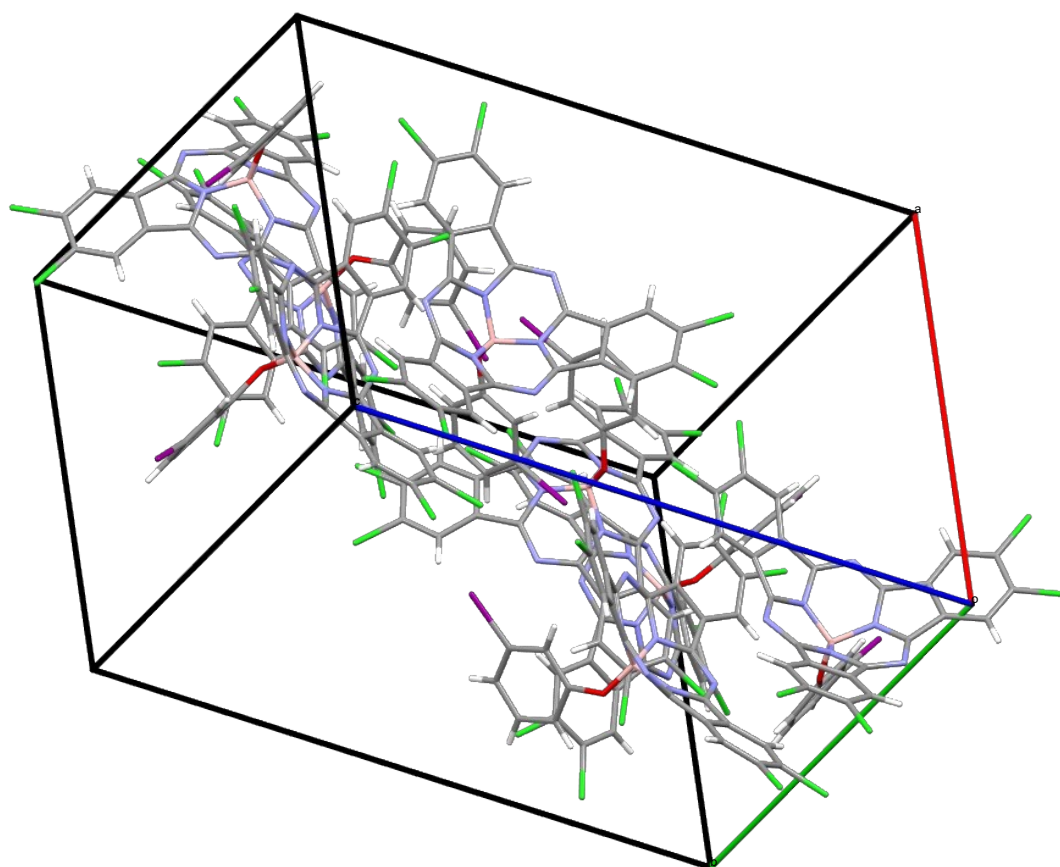

Figure S44: Populated unit cell of *m*-IPhO-Cl<sub>6</sub>BsubPc (Dichlorobenzene:Heptane; CCDC deposit 2087107).

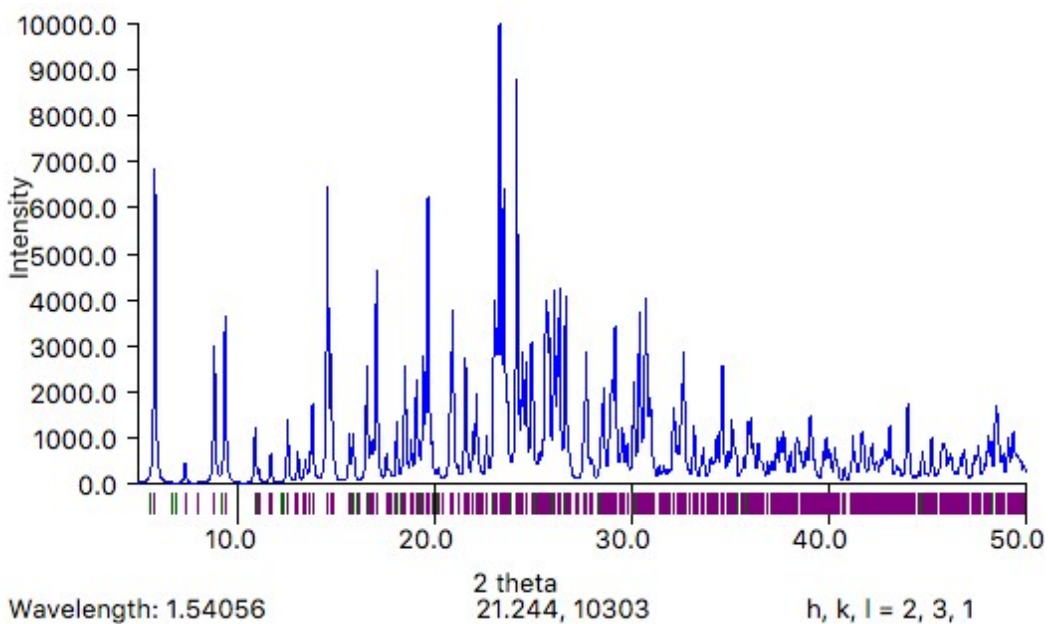

Figure S 45: Powder x-ray diffraction of *m*IPhO-Cl<sub>6</sub>BsubPc (Dichlorobenzene:Heptane; CCDC deposit 2087107).

Table S 85. Crystal data and structure refinement for *m*-IPhO-Cl<sub>6</sub>BsubPc (Dichlorobenzene:Heptane; CCDC deposit 2087107).

|                                   |                                                                      |          |
|-----------------------------------|----------------------------------------------------------------------|----------|
| Identification code               | d2016a_a                                                             |          |
| Empirical formula                 | C <sub>30</sub> H <sub>10</sub> B Cl <sub>6</sub> I N <sub>6</sub> O |          |
| Formula weight                    | 820.85                                                               |          |
| Temperature                       | 150(2) K                                                             |          |
| Wavelength                        | 0.71073 Å                                                            |          |
| Crystal system                    | Orthorhombic                                                         |          |
| Space group                       | Pca2 <sub>1</sub>                                                    |          |
| Unit cell dimensions              | a = 15.8910(5) Å                                                     | α = 90°. |
|                                   | b = 15.1094(5) Å                                                     | β = 90°. |
|                                   | c = 23.9482(7) Å                                                     | γ = 90°. |
| Volume                            | 5750.0(3) Å <sup>3</sup>                                             |          |
| Z                                 | 8                                                                    |          |
| Density (calculated)              | 1.896 Mg/m <sup>3</sup>                                              |          |
| Absorption coefficient            | 1.712 mm <sup>-1</sup>                                               |          |
| F(000)                            | 3200                                                                 |          |
| Crystal size                      | 0.230 x 0.170 x 0.140 mm <sup>3</sup>                                |          |
| Theta range for data collection   | 1.701 to 27.503°.                                                    |          |
| Index ranges                      | -20 ≤ h ≤ 20, -19 ≤ k ≤ 19, -31 ≤ l ≤ 31                             |          |
| Reflections collected             | 145967                                                               |          |
| Independent reflections           | 13192 [R(int) = 0.0485]                                              |          |
| Completeness to theta = 25.242°   | 99.7 %                                                               |          |
| Absorption correction             | Semi-empirical from equivalents                                      |          |
| Max. and min. transmission        | 0.7456 and 0.7006                                                    |          |
| Refinement method                 | Full-matrix least-squares on F <sup>2</sup>                          |          |
| Data / restraints / parameters    | 13192 / 1 / 811                                                      |          |
| Goodness-of-fit on F <sup>2</sup> | 1.044                                                                |          |
| Final R indices [I > 2σ(I)]       | R1 = 0.0301, wR2 = 0.0787                                            |          |
| R indices (all data)              | R1 = 0.0329, wR2 = 0.0801                                            |          |
| Absolute structure parameter      | 0.097(4)                                                             |          |
| Extinction coefficient            | n/a                                                                  |          |
| Largest diff. peak and hole       | 2.035 and -0.864 e.Å <sup>-3</sup>                                   |          |



Table S 86. Atomic coordinates ( $\times 10^4$ ) and equivalent isotropic displacement parameters ( $\text{\AA}^2 \times 10^3$ ) for *m*-IPhO-Cl<sub>6</sub>BsubPc (Dichlorobenzene:Heptane; CCDC deposit 2087107). U(eq) is defined as one third of the trace of the orthogonalized U<sup>ij</sup> tensor.

|        | x       | y       | z       | U(eq) |
|--------|---------|---------|---------|-------|
| I(1A)  | 2981(1) | 4029(1) | 4614(1) | 24(1) |
| Cl(1A) | 9251(1) | 30(1)   | 7029(1) | 23(1) |
| Cl(2A) | 8584(1) | 536(1)  | 8213(1) | 30(1) |
| Cl(3A) | 2330(1) | 1576(1) | 8899(1) | 34(1) |
| Cl(4A) | 1070(1) | 1140(1) | 7918(1) | 34(1) |
| Cl(5A) | 2926(1) | -812(1) | 4231(1) | 35(1) |
| Cl(6A) | 4809(1) | -953(1) | 3853(1) | 30(1) |
| O(1A)  | 5365(2) | 3154(2) | 6163(2) | 18(1) |
| N(1A)  | 5813(3) | 1824(3) | 6585(2) | 17(1) |
| N(2A)  | 5308(3) | 2009(3) | 7512(2) | 19(1) |
| N(3A)  | 4391(3) | 2204(3) | 6731(2) | 17(1) |
| N(4A)  | 3401(3) | 1586(3) | 6094(2) | 18(1) |
| N(5A)  | 4850(3) | 1648(3) | 5857(2) | 16(1) |
| N(6A)  | 6209(3) | 1020(3) | 5771(2) | 17(1) |
| C(1A)  | 6374(3) | 1314(3) | 6290(2) | 17(1) |
| C(2A)  | 7009(3) | 1049(3) | 6692(2) | 16(1) |
| C(3A)  | 7763(3) | 603(3)  | 6631(2) | 17(1) |
| C(4A)  | 8252(3) | 478(3)  | 7104(2) | 18(1) |
| C(5A)  | 7964(3) | 722(4)  | 7634(2) | 19(1) |
| C(6A)  | 7185(3) | 1150(4) | 7703(2) | 19(1) |
| C(7A)  | 6731(3) | 1338(3) | 7227(2) | 17(1) |
| C(8A)  | 5923(3) | 1794(3) | 7147(2) | 15(1) |
| C(9A)  | 4545(3) | 2153(3) | 7292(2) | 17(1) |
| C(10A) | 3719(3) | 2019(3) | 7555(2) | 17(1) |
| C(11A) | 3475(3) | 1927(3) | 8103(2) | 20(1) |
| C(12A) | 2647(4) | 1677(3) | 8215(2) | 23(1) |
| C(13A) | 2085(3) | 1505(4) | 7781(3) | 24(1) |
| C(14A) | 2312(3) | 1600(3) | 7222(2) | 21(1) |
| C(15A) | 3137(3) | 1877(3) | 7112(2) | 19(1) |
| C(16A) | 3588(3) | 1937(3) | 6595(2) | 17(1) |

|        |          |         |         |       |
|--------|----------|---------|---------|-------|
| C(17A) | 4036(3)  | 1408(3) | 5754(2) | 17(1) |
| C(18A) | 4083(3)  | 799(3)  | 5280(2) | 17(1) |
| C(19A) | 3452(3)  | 344(3)  | 5003(2) | 20(1) |
| C(20A) | 3690(3)  | -221(3) | 4575(2) | 23(1) |
| C(21A) | 4549(3)  | -317(3) | 4429(2) | 21(1) |
| C(22A) | 5179(4)  | 90(3)   | 4730(2) | 21(1) |
| C(23A) | 4944(3)  | 648(3)  | 5164(2) | 18(1) |
| C(24A) | 5428(3)  | 1151(3) | 5581(2) | 17(1) |
| C(25A) | 4945(3)  | 3775(3) | 5860(2) | 16(1) |
| C(26A) | 4306(3)  | 3596(3) | 5482(2) | 19(1) |
| C(27A) | 3922(3)  | 4295(3) | 5198(2) | 21(1) |
| C(28A) | 4159(3)  | 5165(4) | 5291(2) | 25(1) |
| C(29A) | 4809(4)  | 5329(4) | 5661(3) | 27(1) |
| C(30A) | 5199(3)  | 4655(3) | 5943(2) | 20(1) |
| B(1A)  | 5091(4)  | 2291(4) | 6311(2) | 17(1) |
| I(1B)  | 2030(1)  | 6516(1) | 5153(1) | 29(1) |
| Cl(1B) | -4221(1) | 2515(1) | 2430(1) | 29(1) |
| Cl(2B) | -3394(1) | 3192(1) | 1327(1) | 38(1) |
| Cl(3B) | 2920(1)  | 3910(1) | 1110(1) | 34(1) |
| Cl(4B) | 4046(1)  | 3487(1) | 2156(1) | 30(1) |
| Cl(5B) | 1422(1)  | 1420(1) | 5724(1) | 33(1) |
| Cl(6B) | -526(1)  | 1282(1) | 5880(1) | 30(1) |
| O(1B)  | -392(2)  | 5559(2) | 3646(2) | 23(1) |
| N(1B)  | -888(3)  | 4278(3) | 3183(2) | 18(1) |
| N(2B)  | -219(3)  | 4433(3) | 2302(2) | 19(1) |
| N(3B)  | 579(3)   | 4537(3) | 3142(2) | 18(1) |
| N(4B)  | 1425(3)  | 3860(3) | 3838(2) | 20(1) |
| N(5B)  | -50(3)   | 4009(3) | 3969(2) | 19(1) |
| N(6B)  | -1453(3) | 3446(3) | 3936(2) | 20(1) |
| C(1B)  | -1516(3) | 3797(3) | 3422(2) | 19(1) |
| C(2B)  | -2104(3) | 3595(3) | 2967(2) | 21(1) |
| C(3B)  | -2874(3) | 3173(4) | 2964(2) | 21(1) |
| C(4B)  | -3270(3) | 3050(3) | 2454(2) | 22(1) |
| C(5B)  | -2879(4) | 3328(4) | 1949(2) | 23(1) |
| C(6B)  | -2104(3) | 3725(4) | 1952(2) | 22(1) |
| C(7B)  | -1716(3) | 3878(3) | 2465(2) | 18(1) |

|        |         |         |         |       |
|--------|---------|---------|---------|-------|
| C(8B)  | -915(3) | 4248(3) | 2604(2) | 16(1) |
| C(9B)  | 518(3)  | 4511(3) | 2573(2) | 18(1) |
| C(10B) | 1351(3) | 4369(3) | 2370(2) | 16(1) |
| C(11B) | 1688(3) | 4278(3) | 1829(2) | 21(1) |
| C(12B) | 2511(4) | 4021(3) | 1771(2) | 22(1) |
| C(13B) | 3015(3) | 3838(3) | 2249(3) | 22(1) |
| C(14B) | 2712(3) | 3919(3) | 2781(2) | 22(1) |
| C(15B) | 1878(3) | 4182(3) | 2842(2) | 20(1) |
| C(16B) | 1336(3) | 4232(3) | 3333(2) | 18(1) |
| C(17B) | 725(3)  | 3711(3) | 4135(2) | 19(1) |
| C(18B) | 572(3)  | 3074(3) | 4574(2) | 19(1) |
| C(19B) | 1105(4) | 2588(3) | 4915(2) | 22(1) |
| C(20B) | 754(3)  | 2038(3) | 5302(2) | 22(1) |
| C(21B) | -122(3) | 1953(3) | 5363(2) | 19(1) |
| C(22B) | -677(3) | 2391(3) | 5014(2) | 20(1) |
| C(23B) | -322(3) | 2966(3) | 4618(2) | 20(1) |
| C(24B) | -691(3) | 3515(3) | 4178(2) | 20(1) |
| C(25B) | 79(3)   | 6200(3) | 3893(2) | 21(1) |
| C(26B) | 716(4)  | 6025(3) | 4285(2) | 22(1) |
| C(27B) | 1121(3) | 6736(4) | 4528(2) | 22(1) |
| C(28B) | 928(4)  | 7605(4) | 4403(2) | 28(1) |
| C(29B) | 267(4)  | 7771(4) | 4023(3) | 34(1) |
| C(30B) | -141(4) | 7065(4) | 3774(2) | 26(1) |
| B(1B)  | -175(4) | 4667(4) | 3513(2) | 18(1) |

---

Table S 87. Bond lengths [ $\text{\AA}$ ] and angles [ $^\circ$ ] for *m*-IPhO-Cl<sub>6</sub>BsubPc (Dichlorobenzene:Heptane; CCDC deposit 2087107).

---

|               |          |
|---------------|----------|
| I(1A)-C(27A)  | 2.087(5) |
| Cl(1A)-C(4A)  | 1.735(5) |
| Cl(2A)-C(5A)  | 1.724(5) |
| Cl(3A)-C(12A) | 1.721(6) |
| Cl(4A)-C(13A) | 1.737(5) |
| Cl(5A)-C(20A) | 1.717(5) |
| Cl(6A)-C(21A) | 1.733(5) |
| O(1A)-C(25A)  | 1.361(6) |
| O(1A)-B(1A)   | 1.419(7) |
| N(1A)-C(8A)   | 1.359(6) |
| N(1A)-C(1A)   | 1.373(6) |
| N(1A)-B(1A)   | 1.498(7) |
| N(2A)-C(9A)   | 1.340(7) |
| N(2A)-C(8A)   | 1.349(7) |
| N(3A)-C(9A)   | 1.369(6) |
| N(3A)-C(16A)  | 1.377(6) |
| N(3A)-B(1A)   | 1.505(7) |
| N(4A)-C(17A)  | 1.325(7) |
| N(4A)-C(16A)  | 1.346(7) |
| N(5A)-C(24A)  | 1.359(6) |
| N(5A)-C(17A)  | 1.366(6) |
| N(5A)-B(1A)   | 1.507(7) |
| N(6A)-C(24A)  | 1.338(6) |
| N(6A)-C(1A)   | 1.345(7) |
| C(1A)-C(2A)   | 1.451(7) |
| C(2A)-C(3A)   | 1.382(7) |
| C(2A)-C(7A)   | 1.425(7) |
| C(3A)-C(4A)   | 1.388(7) |
| C(3A)-H(3AA)  | 0.9500   |
| C(4A)-C(5A)   | 1.398(8) |
| C(5A)-C(6A)   | 1.406(7) |
| C(6A)-C(7A)   | 1.378(7) |

|               |          |
|---------------|----------|
| C(6A)-H(6AA)  | 0.9500   |
| C(7A)-C(8A)   | 1.471(7) |
| C(9A)-C(10A)  | 1.469(7) |
| C(10A)-C(11A) | 1.375(7) |
| C(10A)-C(15A) | 1.425(7) |
| C(11A)-C(12A) | 1.394(8) |
| C(11A)-H(11A) | 0.9500   |
| C(12A)-C(13A) | 1.393(9) |
| C(13A)-C(14A) | 1.393(8) |
| C(14A)-C(15A) | 1.401(7) |
| C(14A)-H(14A) | 0.9500   |
| C(15A)-C(16A) | 1.433(7) |
| C(17A)-C(18A) | 1.463(7) |
| C(18A)-C(19A) | 1.386(7) |
| C(18A)-C(23A) | 1.414(7) |
| C(19A)-C(20A) | 1.387(7) |
| C(19A)-H(19A) | 0.9500   |
| C(20A)-C(21A) | 1.416(7) |
| C(21A)-C(22A) | 1.378(8) |
| C(22A)-C(23A) | 1.391(7) |
| C(22A)-H(22A) | 0.9500   |
| C(23A)-C(24A) | 1.470(7) |
| C(25A)-C(26A) | 1.387(7) |
| C(25A)-C(30A) | 1.403(7) |
| C(26A)-C(27A) | 1.397(7) |
| C(26A)-H(26A) | 0.9500   |
| C(27A)-C(28A) | 1.385(8) |
| C(28A)-C(29A) | 1.383(8) |
| C(28A)-H(28A) | 0.9500   |
| C(29A)-C(30A) | 1.370(7) |
| C(29A)-H(29A) | 0.9500   |
| C(30A)-H(30A) | 0.9500   |
| I(1B)-C(27B)  | 2.107(5) |
| Cl(1B)-C(4B)  | 1.716(5) |
| Cl(2B)-C(5B)  | 1.712(6) |
| Cl(3B)-C(12B) | 1.720(6) |

|               |          |
|---------------|----------|
| Cl(4B)-C(13B) | 1.736(5) |
| Cl(5B)-C(20B) | 1.739(5) |
| Cl(6B)-C(21B) | 1.725(5) |
| O(1B)-C(25B)  | 1.360(6) |
| O(1B)-B(1B)   | 1.427(7) |
| N(1B)-C(1B)   | 1.360(7) |
| N(1B)-C(8B)   | 1.390(6) |
| N(1B)-B(1B)   | 1.501(7) |
| N(2B)-C(9B)   | 1.344(7) |
| N(2B)-C(8B)   | 1.350(7) |
| N(3B)-C(16B)  | 1.367(7) |
| N(3B)-C(9B)   | 1.368(6) |
| N(3B)-B(1B)   | 1.505(7) |
| N(4B)-C(17B)  | 1.340(7) |
| N(4B)-C(16B)  | 1.341(7) |
| N(5B)-C(24B)  | 1.358(7) |
| N(5B)-C(17B)  | 1.371(6) |
| N(5B)-B(1B)   | 1.490(7) |
| N(6B)-C(1B)   | 1.343(7) |
| N(6B)-C(24B)  | 1.348(7) |
| C(1B)-C(2B)   | 1.468(7) |
| C(2B)-C(3B)   | 1.379(7) |
| C(2B)-C(7B)   | 1.416(7) |
| C(3B)-C(4B)   | 1.387(8) |
| C(3B)-H(3BA)  | 0.9500   |
| C(4B)-C(5B)   | 1.424(8) |
| C(5B)-C(6B)   | 1.370(8) |
| C(6B)-C(7B)   | 1.394(7) |
| C(6B)-H(6BA)  | 0.9500   |
| C(7B)-C(8B)   | 1.430(7) |
| C(9B)-C(10B)  | 1.426(7) |
| C(10B)-C(11B) | 1.409(7) |
| C(10B)-C(15B) | 1.436(7) |
| C(11B)-C(12B) | 1.371(8) |
| C(11B)-H(11B) | 0.9500   |
| C(12B)-C(13B) | 1.423(8) |

|                     |          |
|---------------------|----------|
| C(13B)-C(14B)       | 1.368(8) |
| C(14B)-C(15B)       | 1.391(7) |
| C(14B)-H(14B)       | 0.9500   |
| C(15B)-C(16B)       | 1.459(7) |
| C(17B)-C(18B)       | 1.446(7) |
| C(18B)-C(19B)       | 1.387(7) |
| C(18B)-C(23B)       | 1.433(7) |
| C(19B)-C(20B)       | 1.363(8) |
| C(19B)-H(19B)       | 0.9500   |
| C(20B)-C(21B)       | 1.406(7) |
| C(21B)-C(22B)       | 1.383(7) |
| C(22B)-C(23B)       | 1.405(7) |
| C(22B)-H(22B)       | 0.9500   |
| C(23B)-C(24B)       | 1.462(7) |
| C(25B)-C(30B)       | 1.382(8) |
| C(25B)-C(26B)       | 1.406(8) |
| C(26B)-C(27B)       | 1.380(7) |
| C(26B)-H(26B)       | 0.9500   |
| C(27B)-C(28B)       | 1.381(8) |
| C(28B)-C(29B)       | 1.413(9) |
| C(28B)-H(28B)       | 0.9500   |
| C(29B)-C(30B)       | 1.382(8) |
| C(29B)-H(29B)       | 0.9500   |
| C(30B)-H(30B)       | 0.9500   |
|                     |          |
| C(25A)-O(1A)-B(1A)  | 128.0(4) |
| C(8A)-N(1A)-C(1A)   | 114.1(4) |
| C(8A)-N(1A)-B(1A)   | 123.2(4) |
| C(1A)-N(1A)-B(1A)   | 122.4(4) |
| C(9A)-N(2A)-C(8A)   | 116.1(4) |
| C(9A)-N(3A)-C(16A)  | 112.3(4) |
| C(9A)-N(3A)-B(1A)   | 122.0(4) |
| C(16A)-N(3A)-B(1A)  | 123.6(4) |
| C(17A)-N(4A)-C(16A) | 117.4(4) |
| C(24A)-N(5A)-C(17A) | 113.9(4) |
| C(24A)-N(5A)-B(1A)  | 122.4(4) |

|                      |          |
|----------------------|----------|
| C(17A)-N(5A)-B(1A)   | 122.9(4) |
| C(24A)-N(6A)-C(1A)   | 116.5(4) |
| N(6A)-C(1A)-N(1A)    | 122.3(4) |
| N(6A)-C(1A)-C(2A)    | 131.0(5) |
| N(1A)-C(1A)-C(2A)    | 105.4(4) |
| C(3A)-C(2A)-C(7A)    | 120.9(5) |
| C(3A)-C(2A)-C(1A)    | 131.8(5) |
| C(7A)-C(2A)-C(1A)    | 107.3(4) |
| C(2A)-C(3A)-C(4A)    | 117.7(5) |
| C(2A)-C(3A)-H(3AA)   | 121.1    |
| C(4A)-C(3A)-H(3AA)   | 121.1    |
| C(3A)-C(4A)-C(5A)    | 121.5(5) |
| C(3A)-C(4A)-Cl(1A)   | 118.8(4) |
| C(5A)-C(4A)-Cl(1A)   | 119.7(4) |
| C(4A)-C(5A)-C(6A)    | 121.1(5) |
| C(4A)-C(5A)-Cl(2A)   | 120.0(4) |
| C(6A)-C(5A)-Cl(2A)   | 118.8(4) |
| C(7A)-C(6A)-C(5A)    | 117.2(5) |
| C(7A)-C(6A)-H(6AA)   | 121.4    |
| C(5A)-C(6A)-H(6AA)   | 121.4    |
| C(6A)-C(7A)-C(2A)    | 121.3(5) |
| C(6A)-C(7A)-C(8A)    | 131.4(5) |
| C(2A)-C(7A)-C(8A)    | 107.3(4) |
| N(2A)-C(8A)-N(1A)    | 122.7(4) |
| N(2A)-C(8A)-C(7A)    | 131.4(4) |
| N(1A)-C(8A)-C(7A)    | 104.9(4) |
| N(2A)-C(9A)-N(3A)    | 123.8(5) |
| N(2A)-C(9A)-C(10A)   | 128.2(4) |
| N(3A)-C(9A)-C(10A)   | 105.7(4) |
| C(11A)-C(10A)-C(15A) | 120.8(5) |
| C(11A)-C(10A)-C(9A)  | 132.5(5) |
| C(15A)-C(10A)-C(9A)  | 106.3(4) |
| C(10A)-C(11A)-C(12A) | 118.5(5) |
| C(10A)-C(11A)-H(11A) | 120.8    |
| C(12A)-C(11A)-H(11A) | 120.8    |
| C(13A)-C(12A)-C(11A) | 120.8(5) |



|                      |          |
|----------------------|----------|
| C(13A)-C(12A)-Cl(3A) | 120.3(4) |
| C(11A)-C(12A)-Cl(3A) | 118.8(4) |
| C(14A)-C(13A)-C(12A) | 122.0(5) |
| C(14A)-C(13A)-Cl(4A) | 117.1(4) |
| C(12A)-C(13A)-Cl(4A) | 120.9(4) |
| C(13A)-C(14A)-C(15A) | 117.0(5) |
| C(13A)-C(14A)-H(14A) | 121.5    |
| C(15A)-C(14A)-H(14A) | 121.5    |
| C(14A)-C(15A)-C(10A) | 120.8(5) |
| C(14A)-C(15A)-C(16A) | 130.5(5) |
| C(10A)-C(15A)-C(16A) | 108.0(4) |
| N(4A)-C(16A)-N(3A)   | 122.0(4) |
| N(4A)-C(16A)-C(15A)  | 129.4(5) |
| N(3A)-C(16A)-C(15A)  | 106.2(4) |
| N(4A)-C(17A)-N(5A)   | 123.8(4) |
| N(4A)-C(17A)-C(18A)  | 130.0(5) |
| N(5A)-C(17A)-C(18A)  | 105.0(4) |
| C(19A)-C(18A)-C(23A) | 121.8(4) |
| C(19A)-C(18A)-C(17A) | 130.3(5) |
| C(23A)-C(18A)-C(17A) | 107.6(4) |
| C(20A)-C(19A)-C(18A) | 117.5(5) |
| C(20A)-C(19A)-H(19A) | 121.2    |
| C(18A)-C(19A)-H(19A) | 121.2    |
| C(19A)-C(20A)-C(21A) | 120.5(5) |
| C(19A)-C(20A)-Cl(5A) | 118.8(4) |
| C(21A)-C(20A)-Cl(5A) | 120.7(4) |
| C(22A)-C(21A)-C(20A) | 121.8(5) |
| C(22A)-C(21A)-Cl(6A) | 119.3(4) |
| C(20A)-C(21A)-Cl(6A) | 118.9(4) |
| C(21A)-C(22A)-C(23A) | 117.8(5) |
| C(21A)-C(22A)-H(22A) | 121.1    |
| C(23A)-C(22A)-H(22A) | 121.1    |
| C(22A)-C(23A)-C(18A) | 120.3(5) |
| C(22A)-C(23A)-C(24A) | 132.9(5) |
| C(18A)-C(23A)-C(24A) | 106.8(4) |
| N(6A)-C(24A)-N(5A)   | 122.8(4) |

|                      |          |
|----------------------|----------|
| N(6A)-C(24A)-C(23A)  | 129.8(5) |
| N(5A)-C(24A)-C(23A)  | 105.2(4) |
| O(1A)-C(25A)-C(26A)  | 124.9(4) |
| O(1A)-C(25A)-C(30A)  | 115.9(4) |
| C(26A)-C(25A)-C(30A) | 119.2(4) |
| C(25A)-C(26A)-C(27A) | 119.3(5) |
| C(25A)-C(26A)-H(26A) | 120.3    |
| C(27A)-C(26A)-H(26A) | 120.3    |
| C(28A)-C(27A)-C(26A) | 121.3(5) |
| C(28A)-C(27A)-I(1A)  | 119.0(4) |
| C(26A)-C(27A)-I(1A)  | 119.6(4) |
| C(29A)-C(28A)-C(27A) | 118.4(5) |
| C(29A)-C(28A)-H(28A) | 120.8    |
| C(27A)-C(28A)-H(28A) | 120.8    |
| C(30A)-C(29A)-C(28A) | 121.4(5) |
| C(30A)-C(29A)-H(29A) | 119.3    |
| C(28A)-C(29A)-H(29A) | 119.3    |
| C(29A)-C(30A)-C(25A) | 120.2(5) |
| C(29A)-C(30A)-H(30A) | 119.9    |
| C(25A)-C(30A)-H(30A) | 119.9    |
| O(1A)-B(1A)-N(1A)    | 107.9(4) |
| O(1A)-B(1A)-N(3A)    | 118.2(4) |
| N(1A)-B(1A)-N(3A)    | 103.4(4) |
| O(1A)-B(1A)-N(5A)    | 119.4(4) |
| N(1A)-B(1A)-N(5A)    | 102.0(4) |
| N(3A)-B(1A)-N(5A)    | 103.7(4) |
| C(25B)-O(1B)-B(1B)   | 129.5(4) |
| C(1B)-N(1B)-C(8B)    | 112.3(4) |
| C(1B)-N(1B)-B(1B)    | 122.8(4) |
| C(8B)-N(1B)-B(1B)    | 124.2(4) |
| C(9B)-N(2B)-C(8B)    | 118.3(4) |
| C(16B)-N(3B)-C(9B)   | 112.7(4) |
| C(16B)-N(3B)-B(1B)   | 123.2(4) |
| C(9B)-N(3B)-B(1B)    | 122.4(4) |
| C(17B)-N(4B)-C(16B)  | 117.5(4) |
| C(24B)-N(5B)-C(17B)  | 112.7(4) |

|                      |          |
|----------------------|----------|
| C(24B)-N(5B)-B(1B)   | 122.5(4) |
| C(17B)-N(5B)-B(1B)   | 123.5(4) |
| C(1B)-N(6B)-C(24B)   | 115.5(5) |
| N(6B)-C(1B)-N(1B)    | 122.7(5) |
| N(6B)-C(1B)-C(2B)    | 130.2(5) |
| N(1B)-C(1B)-C(2B)    | 105.5(4) |
| C(3B)-C(2B)-C(7B)    | 121.5(5) |
| C(3B)-C(2B)-C(1B)    | 131.6(5) |
| C(7B)-C(2B)-C(1B)    | 106.8(4) |
| C(2B)-C(3B)-C(4B)    | 117.9(5) |
| C(2B)-C(3B)-H(3BA)   | 121.1    |
| C(4B)-C(3B)-H(3BA)   | 121.1    |
| C(3B)-C(4B)-C(5B)    | 120.7(5) |
| C(3B)-C(4B)-Cl(1B)   | 119.6(4) |
| C(5B)-C(4B)-Cl(1B)   | 119.6(4) |
| C(6B)-C(5B)-C(4B)    | 121.1(5) |
| C(6B)-C(5B)-Cl(2B)   | 119.1(4) |
| C(4B)-C(5B)-Cl(2B)   | 119.7(4) |
| C(5B)-C(6B)-C(7B)    | 118.3(5) |
| C(5B)-C(6B)-H(6BA)   | 120.8    |
| C(7B)-C(6B)-H(6BA)   | 120.8    |
| C(6B)-C(7B)-C(2B)    | 120.3(5) |
| C(6B)-C(7B)-C(8B)    | 131.5(5) |
| C(2B)-C(7B)-C(8B)    | 108.0(4) |
| N(2B)-C(8B)-N(1B)    | 120.2(5) |
| N(2B)-C(8B)-C(7B)    | 133.3(5) |
| N(1B)-C(8B)-C(7B)    | 105.8(4) |
| N(2B)-C(9B)-N(3B)    | 123.1(5) |
| N(2B)-C(9B)-C(10B)   | 129.1(5) |
| N(3B)-C(9B)-C(10B)   | 106.2(4) |
| C(11B)-C(10B)-C(9B)  | 133.0(5) |
| C(11B)-C(10B)-C(15B) | 118.9(5) |
| C(9B)-C(10B)-C(15B)  | 107.6(4) |
| C(12B)-C(11B)-C(10B) | 118.8(5) |
| C(12B)-C(11B)-H(11B) | 120.6    |
| C(10B)-C(11B)-H(11B) | 120.6    |

|                      |          |
|----------------------|----------|
| C(11B)-C(12B)-C(13B) | 120.7(5) |
| C(11B)-C(12B)-Cl(3B) | 118.6(4) |
| C(13B)-C(12B)-Cl(3B) | 120.6(4) |
| C(14B)-C(13B)-C(12B) | 122.2(5) |
| C(14B)-C(13B)-Cl(4B) | 118.7(4) |
| C(12B)-C(13B)-Cl(4B) | 119.1(4) |
| C(13B)-C(14B)-C(15B) | 117.3(5) |
| C(13B)-C(14B)-H(14B) | 121.3    |
| C(15B)-C(14B)-H(14B) | 121.3    |
| C(14B)-C(15B)-C(10B) | 121.9(5) |
| C(14B)-C(15B)-C(16B) | 131.4(5) |
| C(10B)-C(15B)-C(16B) | 106.3(4) |
| N(4B)-C(16B)-N(3B)   | 122.4(5) |
| N(4B)-C(16B)-C(15B)  | 130.0(5) |
| N(3B)-C(16B)-C(15B)  | 105.5(4) |
| N(4B)-C(17B)-N(5B)   | 122.4(5) |
| N(4B)-C(17B)-C(18B)  | 129.7(5) |
| N(5B)-C(17B)-C(18B)  | 106.1(4) |
| C(19B)-C(18B)-C(23B) | 120.2(5) |
| C(19B)-C(18B)-C(17B) | 132.6(5) |
| C(23B)-C(18B)-C(17B) | 107.2(4) |
| C(20B)-C(19B)-C(18B) | 118.2(5) |
| C(20B)-C(19B)-H(19B) | 120.9    |
| C(18B)-C(19B)-H(19B) | 120.9    |
| C(19B)-C(20B)-C(21B) | 122.1(5) |
| C(19B)-C(20B)-Cl(5B) | 118.2(4) |
| C(21B)-C(20B)-Cl(5B) | 119.7(4) |
| C(22B)-C(21B)-C(20B) | 121.6(5) |
| C(22B)-C(21B)-Cl(6B) | 118.5(4) |
| C(20B)-C(21B)-Cl(6B) | 119.8(4) |
| C(21B)-C(22B)-C(23B) | 116.6(5) |
| C(21B)-C(22B)-H(22B) | 121.7    |
| C(23B)-C(22B)-H(22B) | 121.7    |
| C(22B)-C(23B)-C(18B) | 121.1(5) |
| C(22B)-C(23B)-C(24B) | 132.5(5) |
| C(18B)-C(23B)-C(24B) | 106.3(4) |

|                      |          |
|----------------------|----------|
| N(6B)-C(24B)-N(5B)   | 123.9(5) |
| N(6B)-C(24B)-C(23B)  | 128.8(5) |
| N(5B)-C(24B)-C(23B)  | 106.1(4) |
| O(1B)-C(25B)-C(30B)  | 116.4(5) |
| O(1B)-C(25B)-C(26B)  | 123.6(5) |
| C(30B)-C(25B)-C(26B) | 119.8(5) |
| C(27B)-C(26B)-C(25B) | 118.1(5) |
| C(27B)-C(26B)-H(26B) | 121.0    |
| C(25B)-C(26B)-H(26B) | 121.0    |
| C(26B)-C(27B)-C(28B) | 123.1(5) |
| C(26B)-C(27B)-I(1B)  | 119.8(4) |
| C(28B)-C(27B)-I(1B)  | 117.1(4) |
| C(27B)-C(28B)-C(29B) | 118.2(5) |
| C(27B)-C(28B)-H(28B) | 120.9    |
| C(29B)-C(28B)-H(28B) | 120.9    |
| C(30B)-C(29B)-C(28B) | 119.3(6) |
| C(30B)-C(29B)-H(29B) | 120.3    |
| C(28B)-C(29B)-H(29B) | 120.3    |
| C(29B)-C(30B)-C(25B) | 121.4(5) |
| C(29B)-C(30B)-H(30B) | 119.3    |
| C(25B)-C(30B)-H(30B) | 119.3    |
| O(1B)-B(1B)-N(5B)    | 120.0(4) |
| O(1B)-B(1B)-N(1B)    | 107.8(4) |
| N(5B)-B(1B)-N(1B)    | 103.0(4) |
| O(1B)-B(1B)-N(3B)    | 116.5(4) |
| N(5B)-B(1B)-N(3B)    | 103.8(4) |
| N(1B)-B(1B)-N(3B)    | 103.9(4) |

---

Symmetry transformations used to generate equivalent atoms:

Table S 88. Anisotropic displacement parameters ( $\text{\AA}^2 \times 10^3$ ) for *m*-IPhO-Cl<sub>6</sub>BsubPc (Dichlorobenzene:Heptane; CCDC deposit 2087107). The anisotropic displacement factor exponent takes the form:  $-2\pi^2 [h^2 a^{*2} U^{11} + \dots + 2 h k a^* b^* U^{12}]$ .

|        | U <sup>11</sup> | U <sup>22</sup> | U <sup>33</sup> | U <sup>23</sup> | U <sup>13</sup> | U <sup>12</sup> |
|--------|-----------------|-----------------|-----------------|-----------------|-----------------|-----------------|
| I(1A)  | 21(1)           | 29(1)           | 22(1)           | 3(1)            | -6(1)           | -1(1)           |
| Cl(1A) | 16(1)           | 23(1)           | 30(1)           | 5(1)            | -2(1)           | 2(1)            |
| Cl(2A) | 24(1)           | 44(1)           | 22(1)           | 9(1)            | -7(1)           | 3(1)            |
| Cl(3A) | 40(1)           | 41(1)           | 22(1)           | 1(1)            | 11(1)           | -2(1)           |
| Cl(4A) | 24(1)           | 40(1)           | 38(1)           | -5(1)           | 11(1)           | -5(1)           |
| Cl(5A) | 33(1)           | 45(1)           | 28(1)           | -17(1)          | -7(1)           | -3(1)           |
| Cl(6A) | 40(1)           | 28(1)           | 21(1)           | -8(1)           | 6(1)            | 1(1)            |
| O(1A)  | 16(2)           | 19(2)           | 19(2)           | 4(1)            | -3(1)           | 1(1)            |
| N(1A)  | 16(2)           | 19(2)           | 16(2)           | 1(2)            | -1(2)           | 0(2)            |
| N(2A)  | 22(2)           | 19(2)           | 16(2)           | -1(2)           | -2(2)           | -2(2)           |
| N(3A)  | 17(2)           | 18(2)           | 16(2)           | -2(2)           | -2(2)           | 4(2)            |
| N(4A)  | 16(2)           | 21(2)           | 18(2)           | 2(2)            | -3(2)           | 2(2)            |
| N(5A)  | 19(2)           | 15(2)           | 15(2)           | 3(2)            | -1(2)           | 1(2)            |
| N(6A)  | 18(2)           | 18(2)           | 15(2)           | 2(2)            | 2(2)            | 0(2)            |
| C(1A)  | 14(2)           | 19(2)           | 19(2)           | 1(2)            | 0(2)            | -2(2)           |
| C(2A)  | 15(2)           | 16(2)           | 18(2)           | 3(2)            | -1(2)           | -5(2)           |
| C(3A)  | 16(2)           | 19(2)           | 17(2)           | 4(2)            | 0(2)            | -2(2)           |
| C(4A)  | 13(2)           | 15(2)           | 25(2)           | 5(2)            | -2(2)           | -1(2)           |
| C(5A)  | 19(2)           | 19(2)           | 18(2)           | 7(2)            | -7(2)           | -2(2)           |
| C(6A)  | 17(2)           | 23(2)           | 17(2)           | 3(2)            | -1(2)           | -2(2)           |
| C(7A)  | 18(2)           | 14(2)           | 18(2)           | 2(2)            | -2(2)           | -1(2)           |
| C(8A)  | 17(2)           | 14(2)           | 15(2)           | 3(2)            | -2(2)           | -1(2)           |
| C(9A)  | 21(2)           | 15(2)           | 16(2)           | 1(2)            | -1(2)           | 1(2)            |
| C(10A) | 22(2)           | 12(2)           | 18(2)           | 0(2)            | 0(2)            | 4(2)            |
| C(11A) | 24(3)           | 16(2)           | 21(2)           | 0(2)            | 1(2)            | 5(2)            |
| C(12A) | 33(3)           | 14(2)           | 23(3)           | -1(2)           | 8(2)            | 5(2)            |
| C(13A) | 20(3)           | 21(2)           | 30(3)           | -1(2)           | 7(2)            | 2(2)            |
| C(14A) | 18(3)           | 18(2)           | 25(3)           | -3(2)           | 0(2)            | 6(2)            |
| C(15A) | 19(2)           | 16(2)           | 22(2)           | -2(2)           | 2(2)            | 5(2)            |
| C(16A) | 20(2)           | 15(2)           | 17(2)           | -1(2)           | -2(2)           | 6(2)            |

|        |       |       |       |       |       |        |
|--------|-------|-------|-------|-------|-------|--------|
| C(17A) | 18(2) | 18(2) | 14(2) | 1(2)  | -6(2) | 3(2)   |
| C(18A) | 22(2) | 20(2) | 10(2) | -1(2) | -2(2) | 2(2)   |
| C(19A) | 20(2) | 22(2) | 17(2) | -1(2) | -4(2) | 4(2)   |
| C(20A) | 27(2) | 25(2) | 15(2) | -2(2) | -9(2) | 1(2)   |
| C(21A) | 28(3) | 19(2) | 15(2) | 0(2)  | 2(2)  | 3(2)   |
| C(22A) | 29(3) | 22(2) | 14(2) | 1(2)  | 1(2)  | 4(2)   |
| C(23A) | 22(2) | 20(2) | 13(2) | 1(2)  | 0(2)  | 2(2)   |
| C(24A) | 18(2) | 20(2) | 14(2) | 2(2)  | 2(2)  | 2(2)   |
| C(25A) | 17(2) | 15(2) | 14(2) | 4(2)  | 2(2)  | 4(2)   |
| C(26A) | 22(2) | 17(2) | 18(2) | 2(2)  | 1(2)  | -1(2)  |
| C(27A) | 20(2) | 24(2) | 18(2) | 3(2)  | 0(2)  | 0(2)   |
| C(28A) | 24(3) | 19(2) | 32(3) | 11(2) | -2(2) | 0(2)   |
| C(29A) | 27(3) | 16(2) | 37(3) | 0(2)  | -4(2) | -4(2)  |
| C(30A) | 17(2) | 21(2) | 22(2) | 4(2)  | 2(2)  | -3(2)  |
| B(1A)  | 20(3) | 17(3) | 15(2) | -2(2) | -2(2) | 4(2)   |
| I(1B)  | 21(1) | 41(1) | 26(1) | -3(1) | -1(1) | -5(1)  |
| Cl(1B) | 17(1) | 36(1) | 35(1) | 3(1)  | -4(1) | -4(1)  |
| Cl(2B) | 30(1) | 60(1) | 24(1) | 2(1)  | -9(1) | -16(1) |
| Cl(3B) | 24(1) | 52(1) | 26(1) | -5(1) | 6(1)  | -2(1)  |
| Cl(4B) | 17(1) | 32(1) | 39(1) | -1(1) | 2(1)  | 1(1)   |
| Cl(5B) | 30(1) | 38(1) | 30(1) | 12(1) | -4(1) | 7(1)   |
| Cl(6B) | 37(1) | 27(1) | 25(1) | 6(1)  | 8(1)  | 1(1)   |
| O(1B)  | 24(2) | 22(2) | 24(2) | -5(2) | -3(2) | 1(2)   |
| N(1B)  | 20(2) | 18(2) | 16(2) | -1(2) | -3(2) | 2(2)   |
| N(2B)  | 21(2) | 18(2) | 18(2) | 2(2)  | -2(2) | 0(2)   |
| N(3B)  | 20(2) | 15(2) | 20(2) | 0(2)  | -2(2) | -1(2)  |
| N(4B)  | 19(2) | 19(2) | 20(2) | -1(2) | -4(2) | -4(2)  |
| N(5B)  | 20(2) | 20(2) | 16(2) | -3(2) | -2(2) | 2(2)   |
| N(6B)  | 20(2) | 21(2) | 20(2) | -4(2) | 1(2)  | 3(2)   |
| C(1B)  | 18(2) | 20(2) | 20(2) | -1(2) | 1(2)  | 2(2)   |
| C(2B)  | 23(3) | 19(2) | 21(3) | -2(2) | 0(2)  | 4(2)   |
| C(3B)  | 20(2) | 22(2) | 22(3) | 1(2)  | -1(2) | 5(2)   |
| C(4B)  | 19(2) | 18(2) | 27(3) | 2(2)  | -1(2) | 1(2)   |
| C(5B)  | 24(3) | 24(3) | 20(3) | 1(2)  | -5(2) | 5(2)   |
| C(6B)  | 21(3) | 26(3) | 18(2) | 2(2)  | -2(2) | 6(2)   |
| C(7B)  | 19(2) | 19(2) | 17(2) | 0(2)  | -1(2) | 4(2)   |

|        |       |       |       |       |        |       |
|--------|-------|-------|-------|-------|--------|-------|
| C(8B)  | 15(2) | 18(2) | 15(2) | 8(2)  | 1(2)   | 9(2)  |
| C(9B)  | 19(2) | 14(2) | 20(2) | 1(2)  | -2(2)  | -2(2) |
| C(10B) | 21(2) | 12(2) | 16(2) | -1(2) | -1(2)  | -8(2) |
| C(11B) | 20(2) | 20(2) | 23(2) | 2(2)  | -3(2)  | -7(2) |
| C(12B) | 19(3) | 22(2) | 25(3) | -4(2) | 4(2)   | -5(2) |
| C(13B) | 15(2) | 16(2) | 34(3) | -1(2) | 0(2)   | -6(2) |
| C(14B) | 15(2) | 15(2) | 35(3) | 2(2)  | -2(2)  | -3(2) |
| C(15B) | 19(2) | 18(2) | 24(3) | 1(2)  | -1(2)  | -5(2) |
| C(16B) | 19(2) | 16(2) | 19(2) | -3(2) | -1(2)  | -1(2) |
| C(17B) | 17(2) | 22(2) | 17(2) | -4(2) | -3(2)  | 1(2)  |
| C(18B) | 17(2) | 21(2) | 19(2) | -1(2) | -2(2)  | -4(2) |
| C(19B) | 26(3) | 24(3) | 18(2) | -2(2) | -1(2)  | -1(2) |
| C(20B) | 26(3) | 16(2) | 23(2) | -5(2) | -3(2)  | 4(2)  |
| C(21B) | 22(2) | 18(2) | 18(2) | -2(2) | 4(2)   | 1(2)  |
| C(22B) | 28(3) | 17(2) | 14(2) | -3(2) | -2(2)  | -2(2) |
| C(23B) | 21(2) | 20(2) | 18(2) | -3(2) | -1(2)  | 2(2)  |
| C(24B) | 23(2) | 21(2) | 15(2) | -4(2) | 4(2)   | -1(2) |
| C(25B) | 18(2) | 20(2) | 24(3) | -3(2) | 5(2)   | 0(2)  |
| C(26B) | 24(3) | 19(2) | 23(3) | -2(2) | 1(2)   | 0(2)  |
| C(27B) | 21(2) | 27(3) | 17(2) | -1(2) | 2(2)   | -2(2) |
| C(28B) | 30(3) | 23(3) | 31(3) | -6(2) | 3(2)   | -7(2) |
| C(29B) | 46(4) | 19(3) | 37(3) | 7(2)  | -11(3) | -6(2) |
| C(30B) | 31(3) | 22(3) | 24(3) | 2(2)  | -3(2)  | -1(2) |
| B(1B)  | 16(2) | 20(3) | 18(3) | -3(2) | -1(2)  | 0(2)  |

---



Table S 89. Hydrogen coordinates ( $\times 10^4$ ) and isotropic displacement parameters ( $\text{\AA}^2 \times 10^{-3}$ ) for *m*-IPhO-Cl<sub>6</sub>BsubPc (Dichlorobenzene:Heptane; CCDC deposit 2087107).

|        | x     | y    | z    | U(eq) |
|--------|-------|------|------|-------|
| H(3AA) | 7940  | 390  | 6276 | 21    |
| H(6AA) | 6980  | 1303 | 8063 | 23    |
| H(11A) | 3861  | 2032 | 8399 | 24    |
| H(14A) | 1926  | 1481 | 6929 | 25    |
| H(19A) | 2877  | 417  | 5102 | 24    |
| H(22A) | 5755  | -9   | 4643 | 26    |
| H(26A) | 4130  | 3004 | 5418 | 23    |
| H(28A) | 3880  | 5637 | 5106 | 30    |
| H(29A) | 4989  | 5921 | 5720 | 32    |
| H(30A) | 5643  | 4784 | 6196 | 24    |
| H(3BA) | -3124 | 2972 | 3302 | 26    |
| H(6BA) | -1837 | 3891 | 1613 | 26    |
| H(11B) | 1352  | 4394 | 1509 | 25    |
| H(14B) | 3057  | 3801 | 3096 | 26    |
| H(19B) | 1699  | 2638 | 4881 | 27    |
| H(22B) | -1268 | 2308 | 5041 | 23    |
| H(26B) | 864   | 5435 | 4380 | 26    |
| H(28B) | 1232  | 8078 | 4568 | 34    |
| H(29B) | 104   | 8361 | 3939 | 41    |
| H(30B) | -581  | 7177 | 3515 | 31    |

Table S 90. Torsion angles [°] for *m*-IPhO-Cl<sub>6</sub>BsubPc (Dichlorobenzene:Heptane; CCDC deposit 2087107).

---

|                           |           |
|---------------------------|-----------|
| C(24A)-N(6A)-C(1A)-N(1A)  | -8.3(7)   |
| C(24A)-N(6A)-C(1A)-C(2A)  | 156.6(5)  |
| C(8A)-N(1A)-C(1A)-N(6A)   | 157.1(5)  |
| B(1A)-N(1A)-C(1A)-N(6A)   | -16.6(7)  |
| C(8A)-N(1A)-C(1A)-C(2A)   | -11.1(5)  |
| B(1A)-N(1A)-C(1A)-C(2A)   | 175.1(4)  |
| N(6A)-C(1A)-C(2A)-C(3A)   | 19.9(9)   |
| N(1A)-C(1A)-C(2A)-C(3A)   | -173.3(5) |
| N(6A)-C(1A)-C(2A)-C(7A)   | -160.1(5) |
| N(1A)-C(1A)-C(2A)-C(7A)   | 6.7(5)    |
| C(7A)-C(2A)-C(3A)-C(4A)   | -2.4(7)   |
| C(1A)-C(2A)-C(3A)-C(4A)   | 177.6(5)  |
| C(2A)-C(3A)-C(4A)-C(5A)   | 5.6(7)    |
| C(2A)-C(3A)-C(4A)-Cl(1A)  | -173.0(4) |
| C(3A)-C(4A)-C(5A)-C(6A)   | -3.6(8)   |
| Cl(1A)-C(4A)-C(5A)-C(6A)  | 175.0(4)  |
| C(3A)-C(4A)-C(5A)-Cl(2A)  | 178.8(4)  |
| Cl(1A)-C(4A)-C(5A)-Cl(2A) | -2.7(6)   |
| C(4A)-C(5A)-C(6A)-C(7A)   | -1.7(8)   |
| Cl(2A)-C(5A)-C(6A)-C(7A)  | 176.0(4)  |
| C(5A)-C(6A)-C(7A)-C(2A)   | 4.8(7)    |
| C(5A)-C(6A)-C(7A)-C(8A)   | -177.9(5) |
| C(3A)-C(2A)-C(7A)-C(6A)   | -2.8(7)   |
| C(1A)-C(2A)-C(7A)-C(6A)   | 177.2(5)  |
| C(3A)-C(2A)-C(7A)-C(8A)   | 179.3(4)  |
| C(1A)-C(2A)-C(7A)-C(8A)   | -0.7(5)   |
| C(9A)-N(2A)-C(8A)-N(1A)   | 8.0(7)    |
| C(9A)-N(2A)-C(8A)-C(7A)   | -158.5(5) |
| C(1A)-N(1A)-C(8A)-N(2A)   | -158.9(5) |
| B(1A)-N(1A)-C(8A)-N(2A)   | 14.8(7)   |
| C(1A)-N(1A)-C(8A)-C(7A)   | 10.6(5)   |
| B(1A)-N(1A)-C(8A)-C(7A)   | -175.7(4) |
| C(6A)-C(7A)-C(8A)-N(2A)   | -15.0(9)  |

|                             |           |
|-----------------------------|-----------|
| C(2A)-C(7A)-C(8A)-N(2A)     | 162.6(5)  |
| C(6A)-C(7A)-C(8A)-N(1A)     | 176.8(5)  |
| C(2A)-C(7A)-C(8A)-N(1A)     | -5.6(5)   |
| C(8A)-N(2A)-C(9A)-N(3A)     | -8.7(7)   |
| C(8A)-N(2A)-C(9A)-C(10A)    | 151.1(5)  |
| C(16A)-N(3A)-C(9A)-N(2A)    | 151.1(5)  |
| B(1A)-N(3A)-C(9A)-N(2A)     | -13.0(7)  |
| C(16A)-N(3A)-C(9A)-C(10A)   | -12.5(5)  |
| B(1A)-N(3A)-C(9A)-C(10A)    | -176.6(4) |
| N(2A)-C(9A)-C(10A)-C(11A)   | 17.8(9)   |
| N(3A)-C(9A)-C(10A)-C(11A)   | -179.5(5) |
| N(2A)-C(9A)-C(10A)-C(15A)   | -154.8(5) |
| N(3A)-C(9A)-C(10A)-C(15A)   | 7.9(5)    |
| C(15A)-C(10A)-C(11A)-C(12A) | 1.1(7)    |
| C(9A)-C(10A)-C(11A)-C(12A)  | -170.6(5) |
| C(10A)-C(11A)-C(12A)-C(13A) | 1.3(7)    |
| C(10A)-C(11A)-C(12A)-Cl(3A) | -179.0(4) |
| C(11A)-C(12A)-C(13A)-C(14A) | -1.9(8)   |
| Cl(3A)-C(12A)-C(13A)-C(14A) | 178.4(4)  |
| C(11A)-C(12A)-C(13A)-Cl(4A) | 176.7(4)  |
| Cl(3A)-C(12A)-C(13A)-Cl(4A) | -2.9(6)   |
| C(12A)-C(13A)-C(14A)-C(15A) | 0.0(7)    |
| Cl(4A)-C(13A)-C(14A)-C(15A) | -178.7(4) |
| C(13A)-C(14A)-C(15A)-C(10A) | 2.5(7)    |
| C(13A)-C(14A)-C(15A)-C(16A) | 171.8(5)  |
| C(11A)-C(10A)-C(15A)-C(14A) | -3.1(7)   |
| C(9A)-C(10A)-C(15A)-C(14A)  | 170.6(4)  |
| C(11A)-C(10A)-C(15A)-C(16A) | -174.6(5) |
| C(9A)-C(10A)-C(15A)-C(16A)  | -0.9(5)   |
| C(17A)-N(4A)-C(16A)-N(3A)   | 7.6(7)    |
| C(17A)-N(4A)-C(16A)-C(15A)  | -152.3(5) |
| C(9A)-N(3A)-C(16A)-N(4A)    | -151.9(5) |
| B(1A)-N(3A)-C(16A)-N(4A)    | 11.9(7)   |
| C(9A)-N(3A)-C(16A)-C(15A)   | 12.0(5)   |
| B(1A)-N(3A)-C(16A)-C(15A)   | 175.8(4)  |
| C(14A)-C(15A)-C(16A)-N(4A)  | -14.4(9)  |

|                             |           |
|-----------------------------|-----------|
| C(10A)-C(15A)-C(16A)-N(4A)  | 156.0(5)  |
| C(14A)-C(15A)-C(16A)-N(3A)  | -176.7(5) |
| C(10A)-C(15A)-C(16A)-N(3A)  | -6.3(5)   |
| C(16A)-N(4A)-C(17A)-N(5A)   | -7.5(7)   |
| C(16A)-N(4A)-C(17A)-C(18A)  | 158.6(5)  |
| C(24A)-N(5A)-C(17A)-N(4A)   | 157.5(5)  |
| B(1A)-N(5A)-C(17A)-N(4A)    | -12.2(7)  |
| C(24A)-N(5A)-C(17A)-C(18A)  | -11.5(5)  |
| B(1A)-N(5A)-C(17A)-C(18A)   | 178.8(4)  |
| N(4A)-C(17A)-C(18A)-C(19A)  | 11.3(9)   |
| N(5A)-C(17A)-C(18A)-C(19A)  | 179.3(5)  |
| N(4A)-C(17A)-C(18A)-C(23A)  | -162.5(5) |
| N(5A)-C(17A)-C(18A)-C(23A)  | 5.5(5)    |
| C(23A)-C(18A)-C(19A)-C(20A) | -4.6(7)   |
| C(17A)-C(18A)-C(19A)-C(20A) | -177.6(5) |
| C(18A)-C(19A)-C(20A)-C(21A) | -0.6(8)   |
| C(18A)-C(19A)-C(20A)-Cl(5A) | 178.7(4)  |
| C(19A)-C(20A)-C(21A)-C(22A) | 5.1(8)    |
| Cl(5A)-C(20A)-C(21A)-C(22A) | -174.2(4) |
| C(19A)-C(20A)-C(21A)-Cl(6A) | -174.3(4) |
| Cl(5A)-C(20A)-C(21A)-Cl(6A) | 6.4(6)    |
| C(20A)-C(21A)-C(22A)-C(23A) | -4.1(8)   |
| Cl(6A)-C(21A)-C(22A)-C(23A) | 175.3(4)  |
| C(21A)-C(22A)-C(23A)-C(18A) | -1.1(7)   |
| C(21A)-C(22A)-C(23A)-C(24A) | 176.9(5)  |
| C(19A)-C(18A)-C(23A)-C(22A) | 5.6(8)    |
| C(17A)-C(18A)-C(23A)-C(22A) | -180.0(4) |
| C(19A)-C(18A)-C(23A)-C(24A) | -172.9(5) |
| C(17A)-C(18A)-C(23A)-C(24A) | 1.6(5)    |
| C(1A)-N(6A)-C(24A)-N(5A)    | 8.0(7)    |
| C(1A)-N(6A)-C(24A)-C(23A)   | -153.1(5) |
| C(17A)-N(5A)-C(24A)-N(6A)   | -152.6(5) |
| B(1A)-N(5A)-C(24A)-N(6A)    | 17.1(7)   |
| C(17A)-N(5A)-C(24A)-C(23A)  | 12.5(5)   |
| B(1A)-N(5A)-C(24A)-C(23A)   | -177.8(4) |
| C(22A)-C(23A)-C(24A)-N(6A)  | -22.7(9)  |

|                             |           |
|-----------------------------|-----------|
| C(18A)-C(23A)-C(24A)-N(6A)  | 155.5(5)  |
| C(22A)-C(23A)-C(24A)-N(5A)  | 173.7(5)  |
| C(18A)-C(23A)-C(24A)-N(5A)  | -8.1(5)   |
| B(1A)-O(1A)-C(25A)-C(26A)   | -23.0(8)  |
| B(1A)-O(1A)-C(25A)-C(30A)   | 157.4(5)  |
| O(1A)-C(25A)-C(26A)-C(27A)  | 179.8(5)  |
| C(30A)-C(25A)-C(26A)-C(27A) | -0.7(7)   |
| C(25A)-C(26A)-C(27A)-C(28A) | -1.1(8)   |
| C(25A)-C(26A)-C(27A)-I(1A)  | 178.4(4)  |
| C(26A)-C(27A)-C(28A)-C(29A) | 2.4(8)    |
| I(1A)-C(27A)-C(28A)-C(29A)  | -177.1(4) |
| C(27A)-C(28A)-C(29A)-C(30A) | -2.0(9)   |
| C(28A)-C(29A)-C(30A)-C(25A) | 0.3(9)    |
| O(1A)-C(25A)-C(30A)-C(29A)  | -179.4(5) |
| C(26A)-C(25A)-C(30A)-C(29A) | 1.0(8)    |
| C(25A)-O(1A)-B(1A)-N(1A)    | 173.2(4)  |
| C(25A)-O(1A)-B(1A)-N(3A)    | -70.1(7)  |
| C(25A)-O(1A)-B(1A)-N(5A)    | 57.6(7)   |
| C(8A)-N(1A)-B(1A)-O(1A)     | 95.1(5)   |
| C(1A)-N(1A)-B(1A)-O(1A)     | -91.8(5)  |
| C(8A)-N(1A)-B(1A)-N(3A)     | -31.0(6)  |
| C(1A)-N(1A)-B(1A)-N(3A)     | 142.2(4)  |
| C(8A)-N(1A)-B(1A)-N(5A)     | -138.4(4) |
| C(1A)-N(1A)-B(1A)-N(5A)     | 34.8(6)   |
| C(9A)-N(3A)-B(1A)-O(1A)     | -89.3(6)  |
| C(16A)-N(3A)-B(1A)-O(1A)    | 108.4(5)  |
| C(9A)-N(3A)-B(1A)-N(1A)     | 29.8(6)   |
| C(16A)-N(3A)-B(1A)-N(1A)    | -132.5(5) |
| C(9A)-N(3A)-B(1A)-N(5A)     | 135.9(4)  |
| C(16A)-N(3A)-B(1A)-N(5A)    | -26.4(6)  |
| C(24A)-N(5A)-B(1A)-O(1A)    | 83.5(6)   |
| C(17A)-N(5A)-B(1A)-O(1A)    | -107.7(6) |
| C(24A)-N(5A)-B(1A)-N(1A)    | -35.2(6)  |
| C(17A)-N(5A)-B(1A)-N(1A)    | 133.6(4)  |
| C(24A)-N(5A)-B(1A)-N(3A)    | -142.4(4) |
| C(17A)-N(5A)-B(1A)-N(3A)    | 26.4(6)   |

|                           |           |
|---------------------------|-----------|
| C(24B)-N(6B)-C(1B)-N(1B)  | -7.2(7)   |
| C(24B)-N(6B)-C(1B)-C(2B)  | 156.2(5)  |
| C(8B)-N(1B)-C(1B)-N(6B)   | 154.0(5)  |
| B(1B)-N(1B)-C(1B)-N(6B)   | -16.8(8)  |
| C(8B)-N(1B)-C(1B)-C(2B)   | -12.9(6)  |
| B(1B)-N(1B)-C(1B)-C(2B)   | 176.3(4)  |
| N(6B)-C(1B)-C(2B)-C(3B)   | 18.6(9)   |
| N(1B)-C(1B)-C(2B)-C(3B)   | -175.8(5) |
| N(6B)-C(1B)-C(2B)-C(7B)   | -157.7(5) |
| N(1B)-C(1B)-C(2B)-C(7B)   | 7.8(5)    |
| C(7B)-C(2B)-C(3B)-C(4B)   | -1.5(8)   |
| C(1B)-C(2B)-C(3B)-C(4B)   | -177.4(5) |
| C(2B)-C(3B)-C(4B)-C(5B)   | 1.9(8)    |
| C(2B)-C(3B)-C(4B)-Cl(1B)  | 179.1(4)  |
| C(3B)-C(4B)-C(5B)-C(6B)   | -0.1(8)   |
| Cl(1B)-C(4B)-C(5B)-C(6B)  | -177.3(4) |
| C(3B)-C(4B)-C(5B)-Cl(2B)  | -178.5(4) |
| Cl(1B)-C(4B)-C(5B)-Cl(2B) | 4.3(6)    |
| C(4B)-C(5B)-C(6B)-C(7B)   | -2.1(8)   |
| Cl(2B)-C(5B)-C(6B)-C(7B)  | 176.3(4)  |
| C(5B)-C(6B)-C(7B)-C(2B)   | 2.5(8)    |
| C(5B)-C(6B)-C(7B)-C(8B)   | 178.0(5)  |
| C(3B)-C(2B)-C(7B)-C(6B)   | -0.7(8)   |
| C(1B)-C(2B)-C(7B)-C(6B)   | 176.1(5)  |
| C(3B)-C(2B)-C(7B)-C(8B)   | -177.2(5) |
| C(1B)-C(2B)-C(7B)-C(8B)   | -0.4(6)   |
| C(9B)-N(2B)-C(8B)-N(1B)   | 9.9(7)    |
| C(9B)-N(2B)-C(8B)-C(7B)   | -158.8(5) |
| C(1B)-N(1B)-C(8B)-N(2B)   | -158.7(4) |
| B(1B)-N(1B)-C(8B)-N(2B)   | 12.0(7)   |
| C(1B)-N(1B)-C(8B)-C(7B)   | 12.8(6)   |
| B(1B)-N(1B)-C(8B)-C(7B)   | -176.5(4) |
| C(6B)-C(7B)-C(8B)-N(2B)   | -13.1(10) |
| C(2B)-C(7B)-C(8B)-N(2B)   | 162.8(5)  |
| C(6B)-C(7B)-C(8B)-N(1B)   | 177.0(5)  |
| C(2B)-C(7B)-C(8B)-N(1B)   | -7.1(5)   |

|                             |           |
|-----------------------------|-----------|
| C(8B)-N(2B)-C(9B)-N(3B)     | -9.6(7)   |
| C(8B)-N(2B)-C(9B)-C(10B)    | 153.7(5)  |
| C(16B)-N(3B)-C(9B)-N(2B)    | 152.9(5)  |
| B(1B)-N(3B)-C(9B)-N(2B)     | -12.7(7)  |
| C(16B)-N(3B)-C(9B)-C(10B)   | -13.6(6)  |
| B(1B)-N(3B)-C(9B)-C(10B)    | -179.2(4) |
| N(2B)-C(9B)-C(10B)-C(11B)   | 14.3(9)   |
| N(3B)-C(9B)-C(10B)-C(11B)   | 179.7(5)  |
| N(2B)-C(9B)-C(10B)-C(15B)   | -157.0(5) |
| N(3B)-C(9B)-C(10B)-C(15B)   | 8.4(5)    |
| C(9B)-C(10B)-C(11B)-C(12B)  | -170.9(5) |
| C(15B)-C(10B)-C(11B)-C(12B) | -0.4(7)   |
| C(10B)-C(11B)-C(12B)-C(13B) | 0.7(8)    |
| C(10B)-C(11B)-C(12B)-Cl(3B) | 179.9(4)  |
| C(11B)-C(12B)-C(13B)-C(14B) | -0.8(8)   |
| Cl(3B)-C(12B)-C(13B)-C(14B) | 179.9(4)  |
| C(11B)-C(12B)-C(13B)-Cl(4B) | 178.4(4)  |
| Cl(3B)-C(12B)-C(13B)-Cl(4B) | -0.8(6)   |
| C(12B)-C(13B)-C(14B)-C(15B) | 0.7(8)    |
| Cl(4B)-C(13B)-C(14B)-C(15B) | -178.5(4) |
| C(13B)-C(14B)-C(15B)-C(10B) | -0.5(7)   |
| C(13B)-C(14B)-C(15B)-C(16B) | 171.9(5)  |
| C(11B)-C(10B)-C(15B)-C(14B) | 0.4(7)    |
| C(9B)-C(10B)-C(15B)-C(14B)  | 173.1(5)  |
| C(11B)-C(10B)-C(15B)-C(16B) | -173.7(4) |
| C(9B)-C(10B)-C(15B)-C(16B)  | -1.0(5)   |
| C(17B)-N(4B)-C(16B)-N(3B)   | 6.6(7)    |
| C(17B)-N(4B)-C(16B)-C(15B)  | -154.2(5) |
| C(9B)-N(3B)-C(16B)-N(4B)    | -151.9(5) |
| B(1B)-N(3B)-C(16B)-N(4B)    | 13.5(7)   |
| C(9B)-N(3B)-C(16B)-C(15B)   | 12.9(6)   |
| B(1B)-N(3B)-C(16B)-C(15B)   | 178.4(4)  |
| C(14B)-C(15B)-C(16B)-N(4B)  | -16.8(9)  |
| C(10B)-C(15B)-C(16B)-N(4B)  | 156.4(5)  |
| C(14B)-C(15B)-C(16B)-N(3B)  | 179.9(5)  |
| C(10B)-C(15B)-C(16B)-N(3B)  | -6.9(5)   |

|                             |           |
|-----------------------------|-----------|
| C(16B)-N(4B)-C(17B)-N(5B)   | -7.3(7)   |
| C(16B)-N(4B)-C(17B)-C(18B)  | 155.6(5)  |
| C(24B)-N(5B)-C(17B)-N(4B)   | 154.8(5)  |
| B(1B)-N(5B)-C(17B)-N(4B)    | -12.5(7)  |
| C(24B)-N(5B)-C(17B)-C(18B)  | -11.6(6)  |
| B(1B)-N(5B)-C(17B)-C(18B)   | -178.9(4) |
| N(4B)-C(17B)-C(18B)-C(19B)  | 18.3(9)   |
| N(5B)-C(17B)-C(18B)-C(19B)  | -176.7(5) |
| N(4B)-C(17B)-C(18B)-C(23B)  | -160.2(5) |
| N(5B)-C(17B)-C(18B)-C(23B)  | 4.8(5)    |
| C(23B)-C(18B)-C(19B)-C(20B) | -2.4(7)   |
| C(17B)-C(18B)-C(19B)-C(20B) | 179.3(5)  |
| C(18B)-C(19B)-C(20B)-C(21B) | -0.2(8)   |
| C(18B)-C(19B)-C(20B)-Cl(5B) | 179.3(4)  |
| C(19B)-C(20B)-C(21B)-C(22B) | 3.4(8)    |
| Cl(5B)-C(20B)-C(21B)-C(22B) | -176.1(4) |
| C(19B)-C(20B)-C(21B)-Cl(6B) | -177.2(4) |
| Cl(5B)-C(20B)-C(21B)-Cl(6B) | 3.4(6)    |
| C(20B)-C(21B)-C(22B)-C(23B) | -3.7(7)   |
| Cl(6B)-C(21B)-C(22B)-C(23B) | 176.8(4)  |
| C(21B)-C(22B)-C(23B)-C(18B) | 1.2(7)    |
| C(21B)-C(22B)-C(23B)-C(24B) | 178.3(5)  |
| C(19B)-C(18B)-C(23B)-C(22B) | 1.9(8)    |
| C(17B)-C(18B)-C(23B)-C(22B) | -179.4(4) |
| C(19B)-C(18B)-C(23B)-C(24B) | -175.9(5) |
| C(17B)-C(18B)-C(23B)-C(24B) | 2.8(5)    |
| C(1B)-N(6B)-C(24B)-N(5B)    | 9.2(7)    |
| C(1B)-N(6B)-C(24B)-C(23B)   | -155.9(5) |
| C(17B)-N(5B)-C(24B)-N(6B)   | -154.7(5) |
| B(1B)-N(5B)-C(24B)-N(6B)    | 12.8(7)   |
| C(17B)-N(5B)-C(24B)-C(23B)  | 13.3(6)   |
| B(1B)-N(5B)-C(24B)-C(23B)   | -179.2(4) |
| C(22B)-C(23B)-C(24B)-N(6B)  | -19.7(9)  |
| C(18B)-C(23B)-C(24B)-N(6B)  | 157.7(5)  |
| C(22B)-C(23B)-C(24B)-N(5B)  | 173.0(5)  |
| C(18B)-C(23B)-C(24B)-N(5B)  | -9.5(5)   |



|                             |           |
|-----------------------------|-----------|
| B(1B)-O(1B)-C(25B)-C(30B)   | 154.8(5)  |
| B(1B)-O(1B)-C(25B)-C(26B)   | -30.1(8)  |
| O(1B)-C(25B)-C(26B)-C(27B)  | -176.8(5) |
| C(30B)-C(25B)-C(26B)-C(27B) | -1.8(8)   |
| C(25B)-C(26B)-C(27B)-C(28B) | -0.1(8)   |
| C(25B)-C(26B)-C(27B)-I(1B)  | 176.3(4)  |
| C(26B)-C(27B)-C(28B)-C(29B) | 2.2(9)    |
| I(1B)-C(27B)-C(28B)-C(29B)  | -174.3(5) |
| C(27B)-C(28B)-C(29B)-C(30B) | -2.4(9)   |
| C(28B)-C(29B)-C(30B)-C(25B) | 0.7(10)   |
| O(1B)-C(25B)-C(30B)-C(29B)  | 176.8(5)  |
| C(26B)-C(25B)-C(30B)-C(29B) | 1.5(9)    |
| C(25B)-O(1B)-B(1B)-N(5B)    | 69.3(7)   |
| C(25B)-O(1B)-B(1B)-N(1B)    | -173.5(5) |
| C(25B)-O(1B)-B(1B)-N(3B)    | -57.3(7)  |
| C(24B)-N(5B)-B(1B)-O(1B)    | 88.9(6)   |
| C(17B)-N(5B)-B(1B)-O(1B)    | -105.0(6) |
| C(24B)-N(5B)-B(1B)-N(1B)    | -30.7(6)  |
| C(17B)-N(5B)-B(1B)-N(1B)    | 135.4(5)  |
| C(24B)-N(5B)-B(1B)-N(3B)    | -138.7(5) |
| C(17B)-N(5B)-B(1B)-N(3B)    | 27.3(6)   |
| C(1B)-N(1B)-B(1B)-O(1B)     | -94.9(6)  |
| C(8B)-N(1B)-B(1B)-O(1B)     | 95.3(5)   |
| C(1B)-N(1B)-B(1B)-N(5B)     | 32.9(6)   |
| C(8B)-N(1B)-B(1B)-N(5B)     | -136.9(5) |
| C(1B)-N(1B)-B(1B)-N(3B)     | 140.9(5)  |
| C(8B)-N(1B)-B(1B)-N(3B)     | -28.9(6)  |
| C(16B)-N(3B)-B(1B)-O(1B)    | 106.5(5)  |
| C(9B)-N(3B)-B(1B)-O(1B)     | -89.5(6)  |
| C(16B)-N(3B)-B(1B)-N(5B)    | -27.8(6)  |
| C(9B)-N(3B)-B(1B)-N(5B)     | 136.3(4)  |
| C(16B)-N(3B)-B(1B)-N(1B)    | -135.2(5) |
| C(9B)-N(3B)-B(1B)-N(1B)     | 28.9(6)   |

---

Symmetry transformations used to generate equivalent atoms:

a)

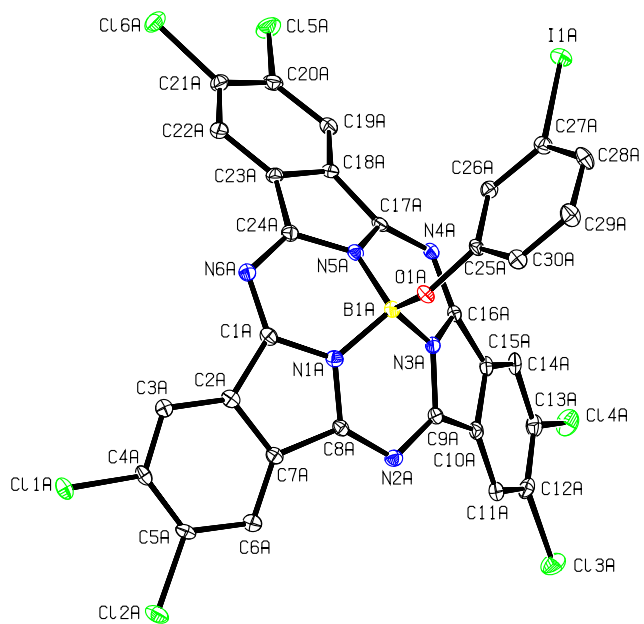

b)

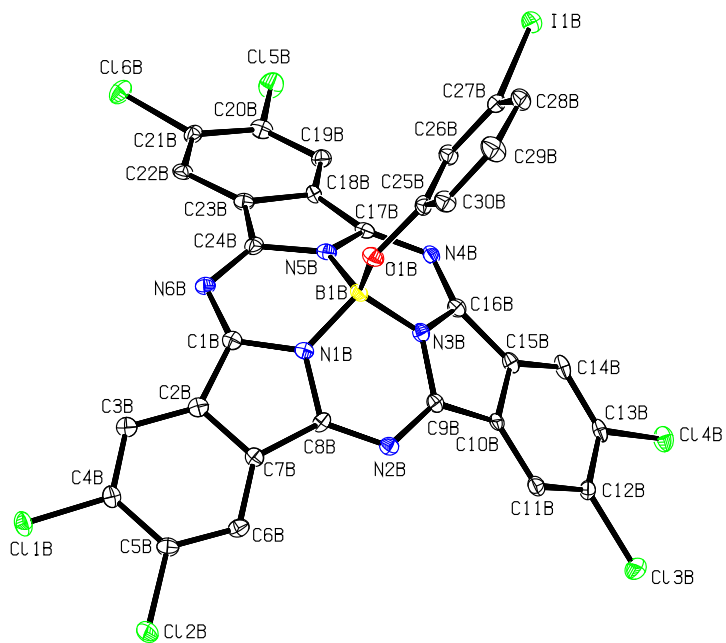

Figure S46: Anisotropic displacement ellipsoid plots of individual co-crystals of *m*-IPhO-Cl<sub>6</sub>BsubPc (Dichlorobenzene:Dimethoxybenzene:Heptane; CCDC deposit 2087105).

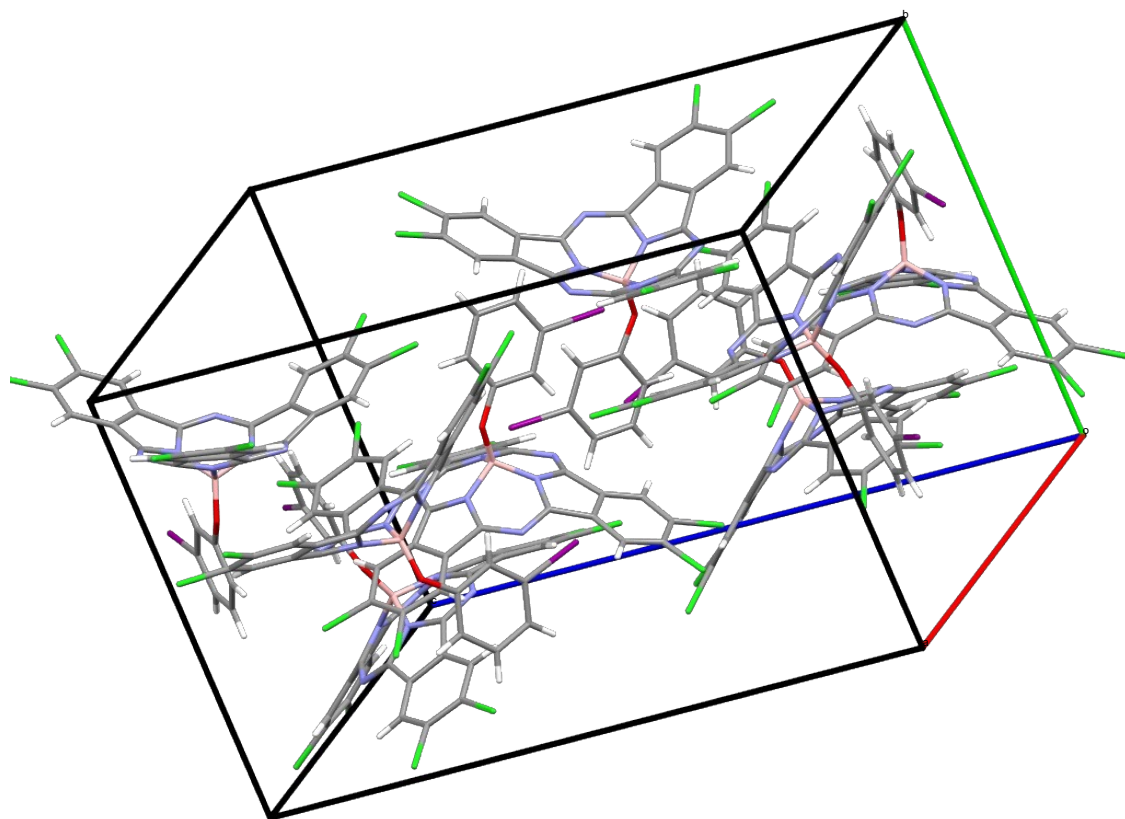

Figure S47: Populated unit cell of *m*-IPhO-Cl<sub>6</sub>BsubPc (Dichlorobenzene:Dimethoxybenzene:Heptane; CCDC deposit 2087105).

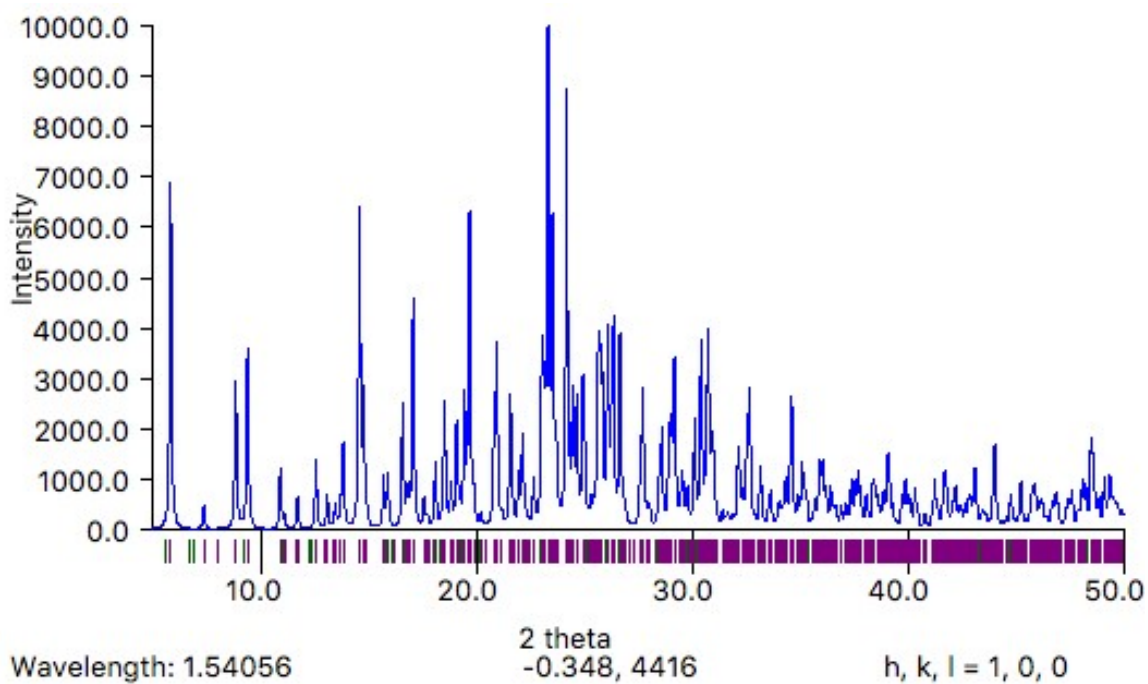

Figure S 48: Powder x-ray diffraction of *m*IPhO-Cl<sub>6</sub>BsubPc (Dichlorobenzene:Dimethoxybenzene:Heptane; CCDC deposit 2087105).

Table S 91. Crystal data and structure refinement for *m*-IPhO-Cl<sub>6</sub>BsubPc  
(Dichlorobenzene:Dimethoxybenzene:Heptane; CCDC deposit 2087105).

|                                   |                                                                      |          |
|-----------------------------------|----------------------------------------------------------------------|----------|
| Identification code               | d2017a_a                                                             |          |
| Empirical formula                 | C <sub>30</sub> H <sub>10</sub> B Cl <sub>6</sub> I N <sub>6</sub> O |          |
| Formula weight                    | 820.85                                                               |          |
| Temperature                       | 150(2) K                                                             |          |
| Wavelength                        | 0.71073 Å                                                            |          |
| Crystal system                    | Orthorhombic                                                         |          |
| Space group                       | Pca2 <sub>1</sub>                                                    |          |
| Unit cell dimensions              | a = 15.8915(6) Å                                                     | α = 90°. |
|                                   | b = 15.1172(6) Å                                                     | β = 90°. |
|                                   | c = 23.9514(9) Å                                                     | γ = 90°. |
| Volume                            | 5754.0(4) Å <sup>3</sup>                                             |          |
| Z                                 | 8                                                                    |          |
| Density (calculated)              | 1.895 Mg/m <sup>3</sup>                                              |          |
| Absorption coefficient            | 1.711 mm <sup>-1</sup>                                               |          |
| F(000)                            | 3200                                                                 |          |
| Crystal size                      | 0.330 x 0.260 x 0.250 mm <sup>3</sup>                                |          |
| Theta range for data collection   | 1.859 to 27.493°.                                                    |          |
| Index ranges                      | -20 ≤ h ≤ 20, -19 ≤ k ≤ 19, -31 ≤ l ≤ 31                             |          |
| Reflections collected             | 143954                                                               |          |
| Independent reflections           | 13197 [R(int) = 0.0491]                                              |          |
| Completeness to theta = 25.242°   | 99.8 %                                                               |          |
| Absorption correction             | Semi-empirical from equivalents                                      |          |
| Max. and min. transmission        | 0.7456 and 0.6639                                                    |          |
| Refinement method                 | Full-matrix least-squares on F <sup>2</sup>                          |          |
| Data / restraints / parameters    | 13197 / 1 / 811                                                      |          |
| Goodness-of-fit on F <sup>2</sup> | 1.040                                                                |          |
| Final R indices [I > 2σ(I)]       | R1 = 0.0284, wR2 = 0.0735                                            |          |
| R indices (all data)              | R1 = 0.0320, wR2 = 0.0750                                            |          |
| Absolute structure parameter      | 0.014(4)                                                             |          |
| Extinction coefficient            | n/a                                                                  |          |
| Largest diff. peak and hole       | 1.326 and -0.683 e.Å <sup>-3</sup>                                   |          |

Table S 92. Atomic coordinates ( $\times 10^4$ ) and equivalent isotropic displacement parameters ( $\text{\AA}^2 \times 10^3$ ) for *m*-IPhO-Cl<sub>6</sub>BsubPc (Dichlorobenzene:Dimethoxybenzene:Heptane; CCDC deposit 2087105). U(eq) is defined as one third of the trace of the orthogonalized U<sup>ij</sup> tensor.

|        | x       | y        | z       | U(eq) |
|--------|---------|----------|---------|-------|
| I(1A)  | 7021(1) | 5969(1)  | 5386(1) | 25(1) |
| Cl(1A) | 749(1)  | 9973(1)  | 2971(1) | 24(1) |
| Cl(2A) | 1418(1) | 9470(1)  | 1787(1) | 30(1) |
| Cl(3A) | 7670(1) | 8421(1)  | 1102(1) | 35(1) |
| Cl(4A) | 8929(1) | 8860(1)  | 2082(1) | 34(1) |
| Cl(5A) | 7074(1) | 10810(1) | 5769(1) | 36(1) |
| Cl(6A) | 5190(1) | 10953(1) | 6147(1) | 30(1) |
| O(1A)  | 4633(2) | 6844(2)  | 3838(1) | 19(1) |
| N(1A)  | 4185(2) | 8175(3)  | 3414(2) | 18(1) |
| N(2A)  | 4689(3) | 7987(3)  | 2488(2) | 19(1) |
| N(3A)  | 5607(2) | 7794(3)  | 3271(2) | 18(1) |
| N(4A)  | 6597(2) | 8411(3)  | 3907(2) | 18(1) |
| N(5A)  | 5151(2) | 8351(2)  | 4144(2) | 16(1) |
| N(6A)  | 3791(2) | 8977(3)  | 4229(2) | 18(1) |
| C(1A)  | 3627(3) | 8686(3)  | 3712(2) | 19(1) |
| C(2A)  | 2992(3) | 8950(3)  | 3306(2) | 18(1) |
| C(3A)  | 2235(3) | 9399(3)  | 3371(2) | 18(1) |
| C(4A)  | 1750(3) | 9522(3)  | 2896(2) | 19(1) |
| C(5A)  | 2038(3) | 9278(4)  | 2367(2) | 20(1) |
| C(6A)  | 2812(3) | 8848(3)  | 2294(2) | 20(1) |
| C(7A)  | 3267(3) | 8663(3)  | 2774(2) | 17(1) |
| C(8A)  | 4076(3) | 8206(3)  | 2855(2) | 17(1) |
| C(9A)  | 5453(3) | 7844(3)  | 2708(2) | 18(1) |
| C(10A) | 6282(3) | 7978(3)  | 2445(2) | 18(1) |
| C(11A) | 6524(3) | 8070(3)  | 1897(2) | 21(1) |
| C(12A) | 7356(4) | 8319(3)  | 1787(2) | 24(1) |
| C(13A) | 7913(3) | 8489(3)  | 2222(2) | 24(1) |
| C(14A) | 7688(3) | 8398(3)  | 2777(2) | 22(1) |
| C(15A) | 6861(3) | 8120(3)  | 2889(2) | 20(1) |
| C(16A) | 6409(3) | 8061(3)  | 3406(2) | 18(1) |

|        |          |          |         |       |
|--------|----------|----------|---------|-------|
| C(17A) | 5962(3)  | 8589(3)  | 4247(2) | 18(1) |
| C(18A) | 5918(3)  | 9200(3)  | 4721(2) | 19(1) |
| C(19A) | 6548(3)  | 9653(3)  | 4999(2) | 22(1) |
| C(20A) | 6311(3)  | 10221(3) | 5424(2) | 24(1) |
| C(21A) | 5448(3)  | 10317(3) | 5572(2) | 22(1) |
| C(22A) | 4818(3)  | 9907(3)  | 5272(2) | 23(1) |
| C(23A) | 5054(3)  | 9347(3)  | 4836(2) | 19(1) |
| C(24A) | 4572(3)  | 8848(3)  | 4421(2) | 18(1) |
| C(25A) | 5055(3)  | 6221(3)  | 4139(2) | 17(1) |
| C(26A) | 5696(3)  | 6403(3)  | 4518(2) | 19(1) |
| C(27A) | 6078(3)  | 5701(3)  | 4804(2) | 21(1) |
| C(28A) | 5841(3)  | 4836(3)  | 4709(2) | 25(1) |
| C(29A) | 5189(4)  | 4670(3)  | 4340(2) | 28(1) |
| C(30A) | 4798(3)  | 5343(3)  | 4057(2) | 21(1) |
| B(1A)  | 4906(3)  | 7706(4)  | 3691(2) | 19(1) |
| I(1B)  | 7971(1)  | 3483(1)  | 4848(1) | 30(1) |
| Cl(1B) | 14223(1) | 7489(1)  | 7570(1) | 29(1) |
| Cl(2B) | 13395(1) | 6810(1)  | 8674(1) | 38(1) |
| Cl(3B) | 7082(1)  | 6090(1)  | 8889(1) | 34(1) |
| Cl(4B) | 5956(1)  | 6513(1)  | 7844(1) | 30(1) |
| Cl(5B) | 8577(1)  | 8582(1)  | 4277(1) | 34(1) |
| Cl(6B) | 10526(1) | 8723(1)  | 4120(1) | 30(1) |
| O(1B)  | 10395(2) | 4444(2)  | 6353(2) | 24(1) |
| N(1B)  | 10891(3) | 5725(3)  | 6818(2) | 18(1) |
| N(2B)  | 10221(3) | 5566(3)  | 7697(2) | 20(1) |
| N(3B)  | 9423(2)  | 5464(3)  | 6859(2) | 18(1) |
| N(4B)  | 8577(3)  | 6141(3)  | 6162(2) | 20(1) |
| N(5B)  | 10053(3) | 5992(3)  | 6031(2) | 19(1) |
| N(6B)  | 11455(3) | 6558(3)  | 6065(2) | 20(1) |
| C(1B)  | 11519(3) | 6207(3)  | 6578(2) | 20(1) |
| C(2B)  | 12104(3) | 6407(3)  | 7031(2) | 21(1) |
| C(3B)  | 12877(3) | 6829(3)  | 7036(2) | 22(1) |
| C(4B)  | 13270(3) | 6952(3)  | 7546(2) | 21(1) |
| C(5B)  | 12882(3) | 6674(4)  | 8052(2) | 23(1) |
| C(6B)  | 12105(3) | 6279(4)  | 8048(2) | 22(1) |
| C(7B)  | 11717(3) | 6124(3)  | 7534(2) | 19(1) |

|        |          |         |         |       |
|--------|----------|---------|---------|-------|
| C(8B)  | 10918(3) | 5752(3) | 7398(2) | 16(1) |
| C(9B)  | 9484(3)  | 5491(3) | 7426(2) | 18(1) |
| C(10B) | 8649(3)  | 5635(3) | 7630(2) | 17(1) |
| C(11B) | 8313(3)  | 5722(3) | 8170(2) | 21(1) |
| C(12B) | 7489(3)  | 5979(3) | 8228(2) | 21(1) |
| C(13B) | 6985(3)  | 6162(3) | 7749(2) | 22(1) |
| C(14B) | 7291(3)  | 6083(3) | 7216(2) | 22(1) |
| C(15B) | 8123(3)  | 5819(3) | 7156(2) | 20(1) |
| C(16B) | 8667(3)  | 5768(3) | 6665(2) | 19(1) |
| C(17B) | 9276(3)  | 6292(3) | 5866(2) | 19(1) |
| C(18B) | 9430(3)  | 6929(3) | 5425(2) | 19(1) |
| C(19B) | 8897(3)  | 7416(3) | 5084(2) | 22(1) |
| C(20B) | 9246(3)  | 7966(3) | 4698(2) | 23(1) |
| C(21B) | 10123(3) | 8053(3) | 4640(2) | 20(1) |
| C(22B) | 10678(3) | 7609(3) | 4986(2) | 20(1) |
| C(23B) | 10323(3) | 7038(3) | 5382(2) | 20(1) |
| C(24B) | 10692(3) | 6491(3) | 5820(2) | 20(1) |
| C(25B) | 9921(3)  | 3800(3) | 6105(2) | 21(1) |
| C(26B) | 9289(3)  | 3973(3) | 5715(2) | 23(1) |
| C(27B) | 8882(3)  | 3265(3) | 5474(2) | 23(1) |
| C(28B) | 9073(4)  | 2399(4) | 5600(2) | 29(1) |
| C(29B) | 9730(4)  | 2233(4) | 5979(3) | 35(1) |
| C(30B) | 10142(3) | 2939(3) | 6227(2) | 26(1) |
| B(1B)  | 10177(3) | 5334(4) | 6488(2) | 19(1) |

---



Table S 93. Bond lengths [ $\text{\AA}$ ] and angles [ $^\circ$ ] for *m*-IPhO-Cl<sub>6</sub>BsubPc  
(Dichlorobenzene:Dimethoxybenzene:Heptane; CCDC deposit 2087105).

---

|               |          |
|---------------|----------|
| I(1A)-C(27A)  | 2.086(5) |
| Cl(1A)-C(4A)  | 1.739(5) |
| Cl(2A)-C(5A)  | 1.727(5) |
| Cl(3A)-C(12A) | 1.720(5) |
| Cl(4A)-C(13A) | 1.742(5) |
| Cl(5A)-C(20A) | 1.717(5) |
| Cl(6A)-C(21A) | 1.729(5) |
| O(1A)-C(25A)  | 1.362(5) |
| O(1A)-B(1A)   | 1.418(7) |
| N(1A)-C(8A)   | 1.352(6) |
| N(1A)-C(1A)   | 1.375(6) |
| N(1A)-B(1A)   | 1.502(6) |
| N(2A)-C(9A)   | 1.340(6) |
| N(2A)-C(8A)   | 1.353(6) |
| N(3A)-C(9A)   | 1.372(6) |
| N(3A)-C(16A)  | 1.376(6) |
| N(3A)-B(1A)   | 1.507(7) |
| N(4A)-C(17A)  | 1.325(6) |
| N(4A)-C(16A)  | 1.344(6) |
| N(5A)-C(17A)  | 1.360(6) |
| N(5A)-C(24A)  | 1.362(6) |
| N(5A)-B(1A)   | 1.509(6) |
| N(6A)-C(24A)  | 1.338(6) |
| N(6A)-C(1A)   | 1.340(6) |
| C(1A)-C(2A)   | 1.457(7) |
| C(2A)-C(3A)   | 1.390(7) |
| C(2A)-C(7A)   | 1.417(7) |
| C(3A)-C(4A)   | 1.387(7) |
| C(3A)-H(3AA)  | 0.9500   |
| C(4A)-C(5A)   | 1.399(7) |
| C(5A)-C(6A)   | 1.403(7) |
| C(6A)-C(7A)   | 1.385(7) |

|               |          |
|---------------|----------|
| C(6A)-H(6AA)  | 0.9500   |
| C(7A)-C(8A)   | 1.472(6) |
| C(9A)-C(10A)  | 1.474(7) |
| C(10A)-C(11A) | 1.375(7) |
| C(10A)-C(15A) | 1.420(7) |
| C(11A)-C(12A) | 1.400(7) |
| C(11A)-H(11A) | 0.9500   |
| C(12A)-C(13A) | 1.392(8) |
| C(13A)-C(14A) | 1.385(8) |
| C(14A)-C(15A) | 1.406(7) |
| C(14A)-H(14A) | 0.9500   |
| C(15A)-C(16A) | 1.435(7) |
| C(17A)-C(18A) | 1.466(6) |
| C(18A)-C(19A) | 1.384(7) |
| C(18A)-C(23A) | 1.418(7) |
| C(19A)-C(20A) | 1.384(7) |
| C(19A)-H(19A) | 0.9500   |
| C(20A)-C(21A) | 1.423(7) |
| C(21A)-C(22A) | 1.380(7) |
| C(22A)-C(23A) | 1.397(7) |
| C(22A)-H(22A) | 0.9500   |
| C(23A)-C(24A) | 1.464(7) |
| C(25A)-C(26A) | 1.392(7) |
| C(25A)-C(30A) | 1.402(7) |
| C(26A)-C(27A) | 1.402(7) |
| C(26A)-H(26A) | 0.9500   |
| C(27A)-C(28A) | 1.379(7) |
| C(28A)-C(29A) | 1.384(8) |
| C(28A)-H(28A) | 0.9500   |
| C(29A)-C(30A) | 1.372(7) |
| C(29A)-H(29A) | 0.9500   |
| C(30A)-H(30A) | 0.9500   |
| I(1B)-C(27B)  | 2.111(5) |
| Cl(1B)-C(4B)  | 1.720(5) |
| Cl(2B)-C(5B)  | 1.711(5) |
| Cl(3B)-C(12B) | 1.720(5) |

|               |          |
|---------------|----------|
| Cl(4B)-C(13B) | 1.734(5) |
| Cl(5B)-C(20B) | 1.737(5) |
| Cl(6B)-C(21B) | 1.729(5) |
| O(1B)-C(25B)  | 1.365(6) |
| O(1B)-B(1B)   | 1.427(6) |
| N(1B)-C(1B)   | 1.363(6) |
| N(1B)-C(8B)   | 1.391(6) |
| N(1B)-B(1B)   | 1.503(6) |
| N(2B)-C(9B)   | 1.343(6) |
| N(2B)-C(8B)   | 1.349(6) |
| N(3B)-C(9B)   | 1.362(6) |
| N(3B)-C(16B)  | 1.368(6) |
| N(3B)-B(1B)   | 1.506(7) |
| N(4B)-C(16B)  | 1.337(6) |
| N(4B)-C(17B)  | 1.339(6) |
| N(5B)-C(24B)  | 1.363(6) |
| N(5B)-C(17B)  | 1.373(6) |
| N(5B)-B(1B)   | 1.492(7) |
| N(6B)-C(1B)   | 1.343(7) |
| N(6B)-C(24B)  | 1.350(7) |
| C(1B)-C(2B)   | 1.460(7) |
| C(2B)-C(3B)   | 1.384(7) |
| C(2B)-C(7B)   | 1.419(7) |
| C(3B)-C(4B)   | 1.384(7) |
| C(3B)-H(3BA)  | 0.9500   |
| C(4B)-C(5B)   | 1.423(7) |
| C(5B)-C(6B)   | 1.373(7) |
| C(6B)-C(7B)   | 1.397(7) |
| C(6B)-H(6BA)  | 0.9500   |
| C(7B)-C(8B)   | 1.426(7) |
| C(9B)-C(10B)  | 1.430(7) |
| C(10B)-C(11B) | 1.406(7) |
| C(10B)-C(15B) | 1.437(7) |
| C(11B)-C(12B) | 1.373(7) |
| C(11B)-H(11B) | 0.9500   |
| C(12B)-C(13B) | 1.425(8) |

|                     |          |
|---------------------|----------|
| C(13B)-C(14B)       | 1.372(8) |
| C(14B)-C(15B)       | 1.388(7) |
| C(14B)-H(14B)       | 0.9500   |
| C(15B)-C(16B)       | 1.461(7) |
| C(17B)-C(18B)       | 1.450(7) |
| C(18B)-C(19B)       | 1.386(7) |
| C(18B)-C(23B)       | 1.433(6) |
| C(19B)-C(20B)       | 1.363(7) |
| C(19B)-H(19B)       | 0.9500   |
| C(20B)-C(21B)       | 1.405(7) |
| C(21B)-C(22B)       | 1.384(7) |
| C(22B)-C(23B)       | 1.401(7) |
| C(22B)-H(22B)       | 0.9500   |
| C(23B)-C(24B)       | 1.459(7) |
| C(25B)-C(30B)       | 1.380(7) |
| C(25B)-C(26B)       | 1.398(7) |
| C(26B)-C(27B)       | 1.377(7) |
| C(26B)-H(26B)       | 0.9500   |
| C(27B)-C(28B)       | 1.378(8) |
| C(28B)-C(29B)       | 1.405(8) |
| C(28B)-H(28B)       | 0.9500   |
| C(29B)-C(30B)       | 1.386(8) |
| C(29B)-H(29B)       | 0.9500   |
| C(30B)-H(30B)       | 0.9500   |
|                     |          |
| C(25A)-O(1A)-B(1A)  | 128.1(4) |
| C(8A)-N(1A)-C(1A)   | 114.3(4) |
| C(8A)-N(1A)-B(1A)   | 123.5(4) |
| C(1A)-N(1A)-B(1A)   | 121.9(4) |
| C(9A)-N(2A)-C(8A)   | 115.9(4) |
| C(9A)-N(3A)-C(16A)  | 112.3(4) |
| C(9A)-N(3A)-B(1A)   | 122.0(4) |
| C(16A)-N(3A)-B(1A)  | 123.6(4) |
| C(17A)-N(4A)-C(16A) | 117.3(4) |
| C(17A)-N(5A)-C(24A) | 114.0(4) |
| C(17A)-N(5A)-B(1A)  | 123.0(4) |

|                      |          |
|----------------------|----------|
| C(24A)-N(5A)-B(1A)   | 122.2(4) |
| C(24A)-N(6A)-C(1A)   | 116.7(4) |
| N(6A)-C(1A)-N(1A)    | 122.6(4) |
| N(6A)-C(1A)-C(2A)    | 131.4(4) |
| N(1A)-C(1A)-C(2A)    | 104.8(4) |
| C(3A)-C(2A)-C(7A)    | 121.2(5) |
| C(3A)-C(2A)-C(1A)    | 131.2(5) |
| C(7A)-C(2A)-C(1A)    | 107.6(4) |
| C(4A)-C(3A)-C(2A)    | 117.1(5) |
| C(4A)-C(3A)-H(3AA)   | 121.5    |
| C(2A)-C(3A)-H(3AA)   | 121.5    |
| C(3A)-C(4A)-C(5A)    | 121.8(4) |
| C(3A)-C(4A)-Cl(1A)   | 118.5(4) |
| C(5A)-C(4A)-Cl(1A)   | 119.7(4) |
| C(4A)-C(5A)-C(6A)    | 121.5(5) |
| C(4A)-C(5A)-Cl(2A)   | 119.9(4) |
| C(6A)-C(5A)-Cl(2A)   | 118.6(4) |
| C(7A)-C(6A)-C(5A)    | 116.7(5) |
| C(7A)-C(6A)-H(6AA)   | 121.7    |
| C(5A)-C(6A)-H(6AA)   | 121.7    |
| C(6A)-C(7A)-C(2A)    | 121.6(4) |
| C(6A)-C(7A)-C(8A)    | 131.3(5) |
| C(2A)-C(7A)-C(8A)    | 107.1(4) |
| N(1A)-C(8A)-N(2A)    | 122.9(4) |
| N(1A)-C(8A)-C(7A)    | 105.0(4) |
| N(2A)-C(8A)-C(7A)    | 131.1(4) |
| N(2A)-C(9A)-N(3A)    | 123.8(4) |
| N(2A)-C(9A)-C(10A)   | 128.3(4) |
| N(3A)-C(9A)-C(10A)   | 105.5(4) |
| C(11A)-C(10A)-C(15A) | 121.2(4) |
| C(11A)-C(10A)-C(9A)  | 132.1(4) |
| C(15A)-C(10A)-C(9A)  | 106.3(4) |
| C(10A)-C(11A)-C(12A) | 118.1(5) |
| C(10A)-C(11A)-H(11A) | 120.9    |
| C(12A)-C(11A)-H(11A) | 120.9    |
| C(13A)-C(12A)-C(11A) | 120.6(5) |

|                      |          |
|----------------------|----------|
| C(13A)-C(12A)-Cl(3A) | 120.8(4) |
| C(11A)-C(12A)-Cl(3A) | 118.6(4) |
| C(14A)-C(13A)-C(12A) | 122.5(5) |
| C(14A)-C(13A)-Cl(4A) | 117.1(4) |
| C(12A)-C(13A)-Cl(4A) | 120.4(4) |
| C(13A)-C(14A)-C(15A) | 117.0(5) |
| C(13A)-C(14A)-H(14A) | 121.5    |
| C(15A)-C(14A)-H(14A) | 121.5    |
| C(14A)-C(15A)-C(10A) | 120.6(5) |
| C(14A)-C(15A)-C(16A) | 130.5(5) |
| C(10A)-C(15A)-C(16A) | 108.2(4) |
| N(4A)-C(16A)-N(3A)   | 122.1(4) |
| N(4A)-C(16A)-C(15A)  | 129.4(5) |
| N(3A)-C(16A)-C(15A)  | 106.2(4) |
| N(4A)-C(17A)-N(5A)   | 123.8(4) |
| N(4A)-C(17A)-C(18A)  | 129.8(4) |
| N(5A)-C(17A)-C(18A)  | 105.2(4) |
| C(19A)-C(18A)-C(23A) | 122.0(4) |
| C(19A)-C(18A)-C(17A) | 130.6(5) |
| C(23A)-C(18A)-C(17A) | 107.2(4) |
| C(20A)-C(19A)-C(18A) | 117.6(5) |
| C(20A)-C(19A)-H(19A) | 121.2    |
| C(18A)-C(19A)-H(19A) | 121.2    |
| C(19A)-C(20A)-C(21A) | 120.7(4) |
| C(19A)-C(20A)-Cl(5A) | 118.9(4) |
| C(21A)-C(20A)-Cl(5A) | 120.5(4) |
| C(22A)-C(21A)-C(20A) | 121.5(5) |
| C(22A)-C(21A)-Cl(6A) | 119.5(4) |
| C(20A)-C(21A)-Cl(6A) | 119.0(4) |
| C(21A)-C(22A)-C(23A) | 117.8(5) |
| C(21A)-C(22A)-H(22A) | 121.1    |
| C(23A)-C(22A)-H(22A) | 121.1    |
| C(22A)-C(23A)-C(18A) | 120.0(4) |
| C(22A)-C(23A)-C(24A) | 132.8(4) |
| C(18A)-C(23A)-C(24A) | 107.2(4) |
| N(6A)-C(24A)-N(5A)   | 122.7(4) |

|                      |          |
|----------------------|----------|
| N(6A)-C(24A)-C(23A)  | 130.1(4) |
| N(5A)-C(24A)-C(23A)  | 105.1(4) |
| O(1A)-C(25A)-C(26A)  | 124.6(4) |
| O(1A)-C(25A)-C(30A)  | 115.9(4) |
| C(26A)-C(25A)-C(30A) | 119.4(4) |
| C(25A)-C(26A)-C(27A) | 119.1(4) |
| C(25A)-C(26A)-H(26A) | 120.5    |
| C(27A)-C(26A)-H(26A) | 120.5    |
| C(28A)-C(27A)-C(26A) | 121.2(5) |
| C(28A)-C(27A)-I(1A)  | 119.4(4) |
| C(26A)-C(27A)-I(1A)  | 119.4(4) |
| C(27A)-C(28A)-C(29A) | 118.8(5) |
| C(27A)-C(28A)-H(28A) | 120.6    |
| C(29A)-C(28A)-H(28A) | 120.6    |
| C(30A)-C(29A)-C(28A) | 121.3(5) |
| C(30A)-C(29A)-H(29A) | 119.3    |
| C(28A)-C(29A)-H(29A) | 119.3    |
| C(29A)-C(30A)-C(25A) | 120.1(5) |
| C(29A)-C(30A)-H(30A) | 120.0    |
| C(25A)-C(30A)-H(30A) | 120.0    |
| O(1A)-B(1A)-N(1A)    | 108.1(4) |
| O(1A)-B(1A)-N(3A)    | 118.2(4) |
| N(1A)-B(1A)-N(3A)    | 103.2(4) |
| O(1A)-B(1A)-N(5A)    | 119.6(4) |
| N(1A)-B(1A)-N(5A)    | 102.1(4) |
| N(3A)-B(1A)-N(5A)    | 103.5(4) |
| C(25B)-O(1B)-B(1B)   | 129.6(4) |
| C(1B)-N(1B)-C(8B)    | 112.4(4) |
| C(1B)-N(1B)-B(1B)    | 122.8(4) |
| C(8B)-N(1B)-B(1B)    | 124.1(4) |
| C(9B)-N(2B)-C(8B)    | 118.5(4) |
| C(9B)-N(3B)-C(16B)   | 113.1(4) |
| C(9B)-N(3B)-B(1B)    | 122.4(4) |
| C(16B)-N(3B)-B(1B)   | 122.8(4) |
| C(16B)-N(4B)-C(17B)  | 117.5(4) |
| C(24B)-N(5B)-C(17B)  | 112.4(4) |

|                      |          |
|----------------------|----------|
| C(24B)-N(5B)-B(1B)   | 122.8(4) |
| C(17B)-N(5B)-B(1B)   | 123.4(4) |
| C(1B)-N(6B)-C(24B)   | 115.9(4) |
| N(6B)-C(1B)-N(1B)    | 122.7(4) |
| N(6B)-C(1B)-C(2B)    | 130.3(5) |
| N(1B)-C(1B)-C(2B)    | 105.3(4) |
| C(3B)-C(2B)-C(7B)    | 121.1(5) |
| C(3B)-C(2B)-C(1B)    | 131.8(5) |
| C(7B)-C(2B)-C(1B)    | 107.0(4) |
| C(2B)-C(3B)-C(4B)    | 118.0(5) |
| C(2B)-C(3B)-H(3BA)   | 121.0    |
| C(4B)-C(3B)-H(3BA)   | 121.0    |
| C(3B)-C(4B)-C(5B)    | 121.1(5) |
| C(3B)-C(4B)-Cl(1B)   | 119.4(4) |
| C(5B)-C(4B)-Cl(1B)   | 119.4(4) |
| C(6B)-C(5B)-C(4B)    | 120.9(5) |
| C(6B)-C(5B)-Cl(2B)   | 119.1(4) |
| C(4B)-C(5B)-Cl(2B)   | 120.0(4) |
| C(5B)-C(6B)-C(7B)    | 118.4(5) |
| C(5B)-C(6B)-H(6BA)   | 120.8    |
| C(7B)-C(6B)-H(6BA)   | 120.8    |
| C(6B)-C(7B)-C(2B)    | 120.5(5) |
| C(6B)-C(7B)-C(8B)    | 131.4(5) |
| C(2B)-C(7B)-C(8B)    | 108.0(4) |
| N(2B)-C(8B)-N(1B)    | 119.9(4) |
| N(2B)-C(8B)-C(7B)    | 133.7(5) |
| N(1B)-C(8B)-C(7B)    | 105.6(4) |
| N(2B)-C(9B)-N(3B)    | 123.1(4) |
| N(2B)-C(9B)-C(10B)   | 129.2(4) |
| N(3B)-C(9B)-C(10B)   | 106.1(4) |
| C(11B)-C(10B)-C(9B)  | 132.8(5) |
| C(11B)-C(10B)-C(15B) | 119.2(4) |
| C(9B)-C(10B)-C(15B)  | 107.5(4) |
| C(12B)-C(11B)-C(10B) | 118.8(5) |
| C(12B)-C(11B)-H(11B) | 120.6    |
| C(10B)-C(11B)-H(11B) | 120.6    |



|                      |          |
|----------------------|----------|
| C(11B)-C(12B)-C(13B) | 120.7(5) |
| C(11B)-C(12B)-Cl(3B) | 118.6(4) |
| C(13B)-C(12B)-Cl(3B) | 120.7(4) |
| C(14B)-C(13B)-C(12B) | 122.1(5) |
| C(14B)-C(13B)-Cl(4B) | 118.9(4) |
| C(12B)-C(13B)-Cl(4B) | 119.0(4) |
| C(13B)-C(14B)-C(15B) | 117.4(5) |
| C(13B)-C(14B)-H(14B) | 121.3    |
| C(15B)-C(14B)-H(14B) | 121.3    |
| C(14B)-C(15B)-C(10B) | 121.9(5) |
| C(14B)-C(15B)-C(16B) | 131.5(5) |
| C(10B)-C(15B)-C(16B) | 106.3(4) |
| N(4B)-C(16B)-N(3B)   | 122.8(4) |
| N(4B)-C(16B)-C(15B)  | 129.7(4) |
| N(3B)-C(16B)-C(15B)  | 105.3(4) |
| N(4B)-C(17B)-N(5B)   | 122.5(4) |
| N(4B)-C(17B)-C(18B)  | 129.8(4) |
| N(5B)-C(17B)-C(18B)  | 106.1(4) |
| C(19B)-C(18B)-C(23B) | 120.2(4) |
| C(19B)-C(18B)-C(17B) | 132.6(4) |
| C(23B)-C(18B)-C(17B) | 107.1(4) |
| C(20B)-C(19B)-C(18B) | 118.3(5) |
| C(20B)-C(19B)-H(19B) | 120.9    |
| C(18B)-C(19B)-H(19B) | 120.9    |
| C(19B)-C(20B)-C(21B) | 121.8(5) |
| C(19B)-C(20B)-Cl(5B) | 118.2(4) |
| C(21B)-C(20B)-Cl(5B) | 120.0(4) |
| C(22B)-C(21B)-C(20B) | 121.9(5) |
| C(22B)-C(21B)-Cl(6B) | 118.6(4) |
| C(20B)-C(21B)-Cl(6B) | 119.5(4) |
| C(21B)-C(22B)-C(23B) | 116.5(5) |
| C(21B)-C(22B)-H(22B) | 121.7    |
| C(23B)-C(22B)-H(22B) | 121.7    |
| C(22B)-C(23B)-C(18B) | 121.2(4) |
| C(22B)-C(23B)-C(24B) | 132.4(4) |
| C(18B)-C(23B)-C(24B) | 106.4(4) |

|                      |          |
|----------------------|----------|
| N(6B)-C(24B)-N(5B)   | 123.4(4) |
| N(6B)-C(24B)-C(23B)  | 129.1(4) |
| N(5B)-C(24B)-C(23B)  | 106.2(4) |
| O(1B)-C(25B)-C(30B)  | 116.1(5) |
| O(1B)-C(25B)-C(26B)  | 123.6(5) |
| C(30B)-C(25B)-C(26B) | 120.1(5) |
| C(27B)-C(26B)-C(25B) | 118.2(5) |
| C(27B)-C(26B)-H(26B) | 120.9    |
| C(25B)-C(26B)-H(26B) | 120.9    |
| C(26B)-C(27B)-C(28B) | 122.9(5) |
| C(26B)-C(27B)-I(1B)  | 119.9(4) |
| C(28B)-C(27B)-I(1B)  | 117.1(4) |
| C(27B)-C(28B)-C(29B) | 118.3(5) |
| C(27B)-C(28B)-H(28B) | 120.8    |
| C(29B)-C(28B)-H(28B) | 120.8    |
| C(30B)-C(29B)-C(28B) | 119.4(5) |
| C(30B)-C(29B)-H(29B) | 120.3    |
| C(28B)-C(29B)-H(29B) | 120.3    |
| C(25B)-C(30B)-C(29B) | 121.0(5) |
| C(25B)-C(30B)-H(30B) | 119.5    |
| C(29B)-C(30B)-H(30B) | 119.5    |
| O(1B)-B(1B)-N(5B)    | 119.7(4) |
| O(1B)-B(1B)-N(1B)    | 107.9(4) |
| N(5B)-B(1B)-N(1B)    | 102.9(4) |
| O(1B)-B(1B)-N(3B)    | 116.7(4) |
| N(5B)-B(1B)-N(3B)    | 104.0(4) |
| N(1B)-B(1B)-N(3B)    | 103.8(4) |

---

Symmetry transformations used to generate equivalent atoms:

Table S 94. Anisotropic displacement parameters ( $\text{\AA}^2 \times 10^3$ ) for *m*-IPhO-Cl<sub>6</sub>BsubPc (**Dichlorobenzene:Dimethoxybenzene:Heptane; CCDC deposit 2087105**). The anisotropic displacement factor exponent takes the form:  $-2\pi^2 [h^2 a^{*2}U^{11} + \dots + 2 h k a^* b^* U^{12}]$

|        | U <sup>11</sup> | U <sup>22</sup> | U <sup>33</sup> | U <sup>23</sup> | U <sup>13</sup> | U <sup>12</sup> |
|--------|-----------------|-----------------|-----------------|-----------------|-----------------|-----------------|
| I(1A)  | 22(1)           | 29(1)           | 24(1)           | 4(1)            | -6(1)           | -1(1)           |
| Cl(1A) | 17(1)           | 22(1)           | 33(1)           | 5(1)            | -2(1)           | 2(1)            |
| Cl(2A) | 24(1)           | 42(1)           | 25(1)           | 9(1)            | -7(1)           | 3(1)            |
| Cl(3A) | 41(1)           | 40(1)           | 24(1)           | 1(1)            | 11(1)           | -3(1)           |
| Cl(4A) | 24(1)           | 39(1)           | 41(1)           | -4(1)           | 11(1)           | -5(1)           |
| Cl(5A) | 33(1)           | 44(1)           | 29(1)           | -16(1)          | -7(1)           | -3(1)           |
| Cl(6A) | 40(1)           | 28(1)           | 23(1)           | -7(1)           | 5(1)            | 2(1)            |
| O(1A)  | 17(2)           | 18(2)           | 21(2)           | 4(1)            | -3(1)           | 1(1)            |
| N(1A)  | 15(2)           | 20(2)           | 18(2)           | 0(2)            | -1(2)           | -1(2)           |
| N(2A)  | 22(2)           | 18(2)           | 18(2)           | 0(2)            | -1(2)           | -1(2)           |
| N(3A)  | 17(2)           | 17(2)           | 19(2)           | -3(2)           | -2(2)           | 3(2)            |
| N(4A)  | 16(2)           | 19(2)           | 19(2)           | 1(2)            | -3(2)           | 3(2)            |
| N(5A)  | 19(2)           | 14(2)           | 17(2)           | 3(2)            | -1(2)           | 1(1)            |
| N(6A)  | 18(2)           | 18(2)           | 19(2)           | 2(2)            | 2(2)            | 0(2)            |
| C(1A)  | 13(2)           | 21(2)           | 22(2)           | 2(2)            | -1(2)           | -1(2)           |
| C(2A)  | 16(2)           | 17(2)           | 21(2)           | 4(2)            | -1(2)           | -4(2)           |
| C(3A)  | 17(2)           | 17(2)           | 20(2)           | 2(2)            | 1(2)            | -2(2)           |
| C(4A)  | 16(2)           | 15(2)           | 27(2)           | 5(2)            | -2(2)           | 0(2)            |
| C(5A)  | 21(2)           | 21(2)           | 18(2)           | 5(2)            | -7(2)           | -3(2)           |
| C(6A)  | 18(2)           | 22(2)           | 20(2)           | 2(2)            | -1(2)           | -2(2)           |
| C(7A)  | 19(2)           | 14(2)           | 19(2)           | 3(2)            | -1(2)           | -2(2)           |
| C(8A)  | 18(2)           | 13(2)           | 19(2)           | 3(2)            | -2(2)           | -1(2)           |
| C(9A)  | 21(2)           | 14(2)           | 18(2)           | 1(2)            | -1(2)           | 3(2)            |
| C(10A) | 21(2)           | 11(2)           | 22(2)           | 0(2)            | -1(2)           | 3(2)            |
| C(11A) | 22(2)           | 18(2)           | 23(2)           | 0(2)            | 0(2)            | 6(2)            |
| C(12A) | 33(3)           | 16(2)           | 23(2)           | -1(2)           | 9(2)            | 4(2)            |
| C(13A) | 20(2)           | 22(2)           | 30(3)           | 1(2)            | 6(2)            | 3(2)            |
| C(14A) | 17(2)           | 17(2)           | 31(3)           | -3(2)           | 2(2)            | 6(2)            |
| C(15A) | 19(2)           | 16(2)           | 25(2)           | 0(2)            | 3(2)            | 6(2)            |
| C(16A) | 20(2)           | 15(2)           | 19(2)           | -1(2)           | -3(2)           | 6(2)            |

|        |       |       |       |       |       |        |
|--------|-------|-------|-------|-------|-------|--------|
| C(17A) | 19(2) | 18(2) | 17(2) | 2(2)  | -7(2) | 3(2)   |
| C(18A) | 23(2) | 20(2) | 13(2) | 1(2)  | -3(2) | 3(2)   |
| C(19A) | 20(2) | 23(2) | 22(2) | 1(2)  | -4(2) | 3(2)   |
| C(20A) | 29(2) | 23(2) | 19(2) | -1(2) | -9(2) | 1(2)   |
| C(21A) | 29(3) | 20(2) | 17(2) | 0(2)  | 2(2)  | 2(2)   |
| C(22A) | 29(2) | 22(2) | 17(2) | 2(2)  | 0(2)  | 4(2)   |
| C(23A) | 24(2) | 18(2) | 14(2) | 1(2)  | -1(2) | 0(2)   |
| C(24A) | 20(2) | 18(2) | 17(2) | 3(2)  | 2(2)  | 1(2)   |
| C(25A) | 18(2) | 16(2) | 17(2) | 6(2)  | 2(2)  | 4(2)   |
| C(26A) | 21(2) | 17(2) | 19(2) | 0(2)  | 1(2)  | -1(2)  |
| C(27A) | 18(2) | 23(2) | 21(2) | 2(2)  | 0(2)  | 0(2)   |
| C(28A) | 24(2) | 17(2) | 34(3) | 11(2) | -2(2) | 1(2)   |
| C(29A) | 29(3) | 16(2) | 38(3) | 1(2)  | -6(2) | -3(2)  |
| C(30A) | 18(2) | 21(2) | 24(2) | 4(2)  | 1(2)  | -2(2)  |
| B(1A)  | 22(3) | 17(2) | 18(2) | -2(2) | -3(2) | 4(2)   |
| I(1B)  | 22(1) | 40(1) | 28(1) | -3(1) | -2(1) | -5(1)  |
| Cl(1B) | 17(1) | 34(1) | 36(1) | 4(1)  | -4(1) | -5(1)  |
| Cl(2B) | 30(1) | 59(1) | 26(1) | 2(1)  | -9(1) | -15(1) |
| Cl(3B) | 25(1) | 51(1) | 27(1) | -5(1) | 6(1)  | -3(1)  |
| Cl(4B) | 18(1) | 32(1) | 40(1) | -1(1) | 2(1)  | 2(1)   |
| Cl(5B) | 30(1) | 38(1) | 32(1) | 12(1) | -4(1) | 7(1)   |
| Cl(6B) | 37(1) | 26(1) | 27(1) | 7(1)  | 7(1)  | 1(1)   |
| O(1B)  | 25(2) | 22(2) | 26(2) | -5(2) | -3(2) | 0(1)   |
| N(1B)  | 20(2) | 19(2) | 17(2) | -1(2) | -2(2) | 0(2)   |
| N(2B)  | 21(2) | 19(2) | 19(2) | 1(2)  | -3(2) | 1(2)   |
| N(3B)  | 18(2) | 16(2) | 21(2) | 1(2)  | -1(2) | -1(2)  |
| N(4B)  | 20(2) | 19(2) | 21(2) | 0(2)  | -2(2) | -5(2)  |
| N(5B)  | 20(2) | 21(2) | 17(2) | -4(2) | -2(2) | 2(2)   |
| N(6B)  | 22(2) | 20(2) | 19(2) | -3(2) | 1(2)  | 2(2)   |
| C(1B)  | 20(2) | 18(2) | 22(2) | -2(2) | 0(2)  | 4(2)   |
| C(2B)  | 22(2) | 18(2) | 22(3) | 0(2)  | 0(2)  | 4(2)   |
| C(3B)  | 21(2) | 22(2) | 23(3) | 0(2)  | -2(2) | 5(2)   |
| C(4B)  | 20(2) | 17(2) | 28(3) | 3(2)  | -1(2) | 1(2)   |
| C(5B)  | 25(3) | 25(3) | 20(2) | 1(2)  | -5(2) | 3(2)   |
| C(6B)  | 21(2) | 27(3) | 18(2) | 1(2)  | 0(2)  | 6(2)   |
| C(7B)  | 17(2) | 19(2) | 21(2) | 1(2)  | -2(2) | 3(2)   |

|        |       |       |       |       |        |       |
|--------|-------|-------|-------|-------|--------|-------|
| C(8B)  | 14(2) | 18(2) | 17(2) | 7(2)  | 1(2)   | 9(2)  |
| C(9B)  | 20(2) | 12(2) | 22(2) | 1(2)  | -1(2)  | -1(2) |
| C(10B) | 21(2) | 13(2) | 18(2) | 0(2)  | -1(2)  | -8(2) |
| C(11B) | 21(2) | 20(2) | 24(2) | 1(2)  | -2(2)  | -6(2) |
| C(12B) | 18(2) | 23(2) | 23(2) | -2(2) | 4(2)   | -5(2) |
| C(13B) | 15(2) | 15(2) | 35(3) | -2(2) | -1(2)  | -5(2) |
| C(14B) | 16(2) | 16(2) | 36(3) | 2(2)  | -3(2)  | -3(2) |
| C(15B) | 19(2) | 14(2) | 27(3) | 1(2)  | -3(2)  | -3(2) |
| C(16B) | 21(2) | 16(2) | 22(2) | -1(2) | -1(2)  | 0(2)  |
| C(17B) | 19(2) | 21(2) | 18(2) | -5(2) | -4(2)  | 1(2)  |
| C(18B) | 17(2) | 20(2) | 20(2) | -2(2) | 0(2)   | -6(2) |
| C(19B) | 27(2) | 22(2) | 19(2) | -2(2) | 1(2)   | -2(2) |
| C(20B) | 26(2) | 16(2) | 25(2) | -3(2) | -4(2)  | 5(2)  |
| C(21B) | 25(2) | 17(2) | 19(2) | -2(2) | 5(2)   | -1(2) |
| C(22B) | 27(2) | 16(2) | 17(2) | -4(2) | -1(2)  | -2(2) |
| C(23B) | 22(2) | 19(2) | 19(2) | -3(2) | -1(2)  | 3(2)  |
| C(24B) | 24(2) | 18(2) | 19(2) | -3(2) | 4(2)   | 0(2)  |
| C(25B) | 18(2) | 21(2) | 25(2) | -3(2) | 5(2)   | -2(2) |
| C(26B) | 24(2) | 19(2) | 26(3) | -2(2) | 2(2)   | -2(2) |
| C(27B) | 22(2) | 28(2) | 18(2) | 0(2)  | 2(2)   | -3(2) |
| C(28B) | 31(3) | 23(3) | 32(3) | -6(2) | 3(2)   | -8(2) |
| C(29B) | 45(3) | 21(3) | 39(3) | 6(2)  | -10(3) | -6(2) |
| C(30B) | 29(3) | 22(2) | 28(3) | 0(2)  | -2(2)  | 0(2)  |
| B(1B)  | 15(2) | 21(3) | 20(3) | -4(2) | -2(2)  | -1(2) |

---

Table S 95. Hydrogen coordinates ( $\times 10^4$ ) and isotropic displacement parameters ( $\text{\AA}^2 \times 10^{-3}$ ) for *m*-IPhO-Cl<sub>6</sub>BsubPc (Dichlorobenzene:Dimethoxybenzene:Heptane; CCDC deposit 2087105).

|        | x     | y     | z    | U(eq) |
|--------|-------|-------|------|-------|
| H(3AA) | 2058  | 9612  | 3726 | 22    |
| H(6AA) | 3015  | 8690  | 1934 | 24    |
| H(11A) | 6137  | 7967  | 1602 | 25    |
| H(14A) | 8075  | 8519  | 3070 | 26    |
| H(19A) | 7123  | 9577  | 4902 | 26    |
| H(22A) | 4242  | 10003 | 5360 | 27    |
| H(26A) | 5872  | 6995  | 4582 | 23    |
| H(28A) | 6120  | 4363  | 4893 | 30    |
| H(29A) | 5009  | 4078  | 4282 | 33    |
| H(30A) | 4352  | 5214  | 3805 | 25    |
| H(3BA) | 13130 | 7029  | 6699 | 26    |
| H(6BA) | 11837 | 6114  | 8387 | 27    |
| H(11B) | 8650  | 5605  | 8489 | 26    |
| H(14B) | 6947  | 6204  | 6901 | 27    |
| H(19B) | 8303  | 7367  | 5120 | 27    |
| H(22B) | 11270 | 7687  | 4956 | 24    |
| H(26B) | 9143  | 4563  | 5618 | 27    |
| H(28B) | 8768  | 1926  | 5436 | 35    |
| H(29B) | 9891  | 1643  | 6063 | 42    |
| H(30B) | 10583 | 2828  | 6486 | 31    |

Table S 96. Torsion angles [°] for *m*-IPhO-Cl<sub>6</sub>BsubPc (Dichlorobenzene:Dimethoxybenzene:Heptane; CCDC deposit 2087105).

---

|                           |           |
|---------------------------|-----------|
| C(24A)-N(6A)-C(1A)-N(1A)  | 8.4(7)    |
| C(24A)-N(6A)-C(1A)-C(2A)  | -156.5(5) |
| C(8A)-N(1A)-C(1A)-N(6A)   | -157.2(4) |
| B(1A)-N(1A)-C(1A)-N(6A)   | 16.7(7)   |
| C(8A)-N(1A)-C(1A)-C(2A)   | 11.1(5)   |
| B(1A)-N(1A)-C(1A)-C(2A)   | -175.0(4) |
| N(6A)-C(1A)-C(2A)-C(3A)   | -19.9(9)  |
| N(1A)-C(1A)-C(2A)-C(3A)   | 173.2(5)  |
| N(6A)-C(1A)-C(2A)-C(7A)   | 160.2(5)  |
| N(1A)-C(1A)-C(2A)-C(7A)   | -6.7(5)   |
| C(7A)-C(2A)-C(3A)-C(4A)   | 2.3(7)    |
| C(1A)-C(2A)-C(3A)-C(4A)   | -177.6(5) |
| C(2A)-C(3A)-C(4A)-C(5A)   | -5.6(7)   |
| C(2A)-C(3A)-C(4A)-Cl(1A)  | 173.2(3)  |
| C(3A)-C(4A)-C(5A)-C(6A)   | 4.0(7)    |
| Cl(1A)-C(4A)-C(5A)-C(6A)  | -174.8(4) |
| C(3A)-C(4A)-C(5A)-Cl(2A)  | -178.5(4) |
| Cl(1A)-C(4A)-C(5A)-Cl(2A) | 2.7(6)    |
| C(4A)-C(5A)-C(6A)-C(7A)   | 1.1(7)    |
| Cl(2A)-C(5A)-C(6A)-C(7A)  | -176.4(4) |
| C(5A)-C(6A)-C(7A)-C(2A)   | -4.3(7)   |
| C(5A)-C(6A)-C(7A)-C(8A)   | 178.1(5)  |
| C(3A)-C(2A)-C(7A)-C(6A)   | 2.7(7)    |
| C(1A)-C(2A)-C(7A)-C(6A)   | -177.4(4) |
| C(3A)-C(2A)-C(7A)-C(8A)   | -179.2(4) |
| C(1A)-C(2A)-C(7A)-C(8A)   | 0.7(5)    |
| C(1A)-N(1A)-C(8A)-N(2A)   | 159.1(4)  |
| B(1A)-N(1A)-C(8A)-N(2A)   | -14.7(7)  |
| C(1A)-N(1A)-C(8A)-C(7A)   | -10.7(5)  |
| B(1A)-N(1A)-C(8A)-C(7A)   | 175.5(4)  |
| C(9A)-N(2A)-C(8A)-N(1A)   | -8.2(7)   |
| C(9A)-N(2A)-C(8A)-C(7A)   | 158.6(5)  |

|                             |           |
|-----------------------------|-----------|
| C(6A)-C(7A)-C(8A)-N(1A)     | -176.5(5) |
| C(2A)-C(7A)-C(8A)-N(1A)     | 5.6(5)    |
| C(6A)-C(7A)-C(8A)-N(2A)     | 14.9(9)   |
| C(2A)-C(7A)-C(8A)-N(2A)     | -162.9(5) |
| C(8A)-N(2A)-C(9A)-N(3A)     | 9.0(7)    |
| C(8A)-N(2A)-C(9A)-C(10A)    | -150.9(5) |
| C(16A)-N(3A)-C(9A)-N(2A)    | -151.1(4) |
| B(1A)-N(3A)-C(9A)-N(2A)     | 12.9(7)   |
| C(16A)-N(3A)-C(9A)-C(10A)   | 12.6(5)   |
| B(1A)-N(3A)-C(9A)-C(10A)    | 176.6(4)  |
| N(2A)-C(9A)-C(10A)-C(11A)   | -17.8(8)  |
| N(3A)-C(9A)-C(10A)-C(11A)   | 179.5(5)  |
| N(2A)-C(9A)-C(10A)-C(15A)   | 154.8(5)  |
| N(3A)-C(9A)-C(10A)-C(15A)   | -7.9(5)   |
| C(15A)-C(10A)-C(11A)-C(12A) | -0.9(7)   |
| C(9A)-C(10A)-C(11A)-C(12A)  | 170.8(5)  |
| C(10A)-C(11A)-C(12A)-C(13A) | -1.6(7)   |
| C(10A)-C(11A)-C(12A)-Cl(3A) | 179.1(4)  |
| C(11A)-C(12A)-C(13A)-C(14A) | 1.9(7)    |
| Cl(3A)-C(12A)-C(13A)-C(14A) | -178.8(4) |
| C(11A)-C(12A)-C(13A)-Cl(4A) | -176.3(4) |
| Cl(3A)-C(12A)-C(13A)-Cl(4A) | 3.0(6)    |
| C(12A)-C(13A)-C(14A)-C(15A) | 0.2(7)    |
| Cl(4A)-C(13A)-C(14A)-C(15A) | 178.5(3)  |
| C(13A)-C(14A)-C(15A)-C(10A) | -2.6(7)   |
| C(13A)-C(14A)-C(15A)-C(16A) | -171.9(5) |
| C(11A)-C(10A)-C(15A)-C(14A) | 3.0(7)    |
| C(9A)-C(10A)-C(15A)-C(14A)  | -170.6(4) |
| C(11A)-C(10A)-C(15A)-C(16A) | 174.5(4)  |
| C(9A)-C(10A)-C(15A)-C(16A)  | 0.9(5)    |
| C(17A)-N(4A)-C(16A)-N(3A)   | -7.8(7)   |
| C(17A)-N(4A)-C(16A)-C(15A)  | 152.4(5)  |
| C(9A)-N(3A)-C(16A)-N(4A)    | 152.0(4)  |
| B(1A)-N(3A)-C(16A)-N(4A)    | -11.7(7)  |
| C(9A)-N(3A)-C(16A)-C(15A)   | -12.2(5)  |
| B(1A)-N(3A)-C(16A)-C(15A)   | -175.9(4) |



|                             |           |
|-----------------------------|-----------|
| C(14A)-C(15A)-C(16A)-N(4A)  | 14.2(8)   |
| C(10A)-C(15A)-C(16A)-N(4A)  | -156.1(5) |
| C(14A)-C(15A)-C(16A)-N(3A)  | 176.8(5)  |
| C(10A)-C(15A)-C(16A)-N(3A)  | 6.5(5)    |
| C(16A)-N(4A)-C(17A)-N(5A)   | 7.4(7)    |
| C(16A)-N(4A)-C(17A)-C(18A)  | -158.5(5) |
| C(24A)-N(5A)-C(17A)-N(4A)   | -157.5(4) |
| B(1A)-N(5A)-C(17A)-N(4A)    | 12.4(7)   |
| C(24A)-N(5A)-C(17A)-C(18A)  | 11.4(5)   |
| B(1A)-N(5A)-C(17A)-C(18A)   | -178.8(4) |
| N(4A)-C(17A)-C(18A)-C(19A)  | -11.4(9)  |
| N(5A)-C(17A)-C(18A)-C(19A)  | -179.4(5) |
| N(4A)-C(17A)-C(18A)-C(23A)  | 162.5(5)  |
| N(5A)-C(17A)-C(18A)-C(23A)  | -5.4(5)   |
| C(23A)-C(18A)-C(19A)-C(20A) | 4.1(7)    |
| C(17A)-C(18A)-C(19A)-C(20A) | 177.3(5)  |
| C(18A)-C(19A)-C(20A)-C(21A) | 1.2(7)    |
| C(18A)-C(19A)-C(20A)-Cl(5A) | -178.8(4) |
| C(19A)-C(20A)-C(21A)-C(22A) | -5.4(8)   |
| Cl(5A)-C(20A)-C(21A)-C(22A) | 174.7(4)  |
| C(19A)-C(20A)-C(21A)-Cl(6A) | 174.0(4)  |
| Cl(5A)-C(20A)-C(21A)-Cl(6A) | -6.0(6)   |
| C(20A)-C(21A)-C(22A)-C(23A) | 3.9(7)    |
| Cl(6A)-C(21A)-C(22A)-C(23A) | -175.4(4) |
| C(21A)-C(22A)-C(23A)-C(18A) | 1.4(7)    |
| C(21A)-C(22A)-C(23A)-C(24A) | -176.7(5) |
| C(19A)-C(18A)-C(23A)-C(22A) | -5.6(7)   |
| C(17A)-C(18A)-C(23A)-C(22A) | 179.9(4)  |
| C(19A)-C(18A)-C(23A)-C(24A) | 172.9(4)  |
| C(17A)-C(18A)-C(23A)-C(24A) | -1.7(5)   |
| C(1A)-N(6A)-C(24A)-N(5A)    | -8.1(7)   |
| C(1A)-N(6A)-C(24A)-C(23A)   | 152.8(5)  |
| C(17A)-N(5A)-C(24A)-N(6A)   | 152.6(4)  |
| B(1A)-N(5A)-C(24A)-N(6A)    | -17.4(7)  |
| C(17A)-N(5A)-C(24A)-C(23A)  | -12.4(5)  |
| B(1A)-N(5A)-C(24A)-C(23A)   | 177.6(4)  |

|                             |           |
|-----------------------------|-----------|
| C(22A)-C(23A)-C(24A)-N(6A)  | 22.9(9)   |
| C(18A)-C(23A)-C(24A)-N(6A)  | -155.3(5) |
| C(22A)-C(23A)-C(24A)-N(5A)  | -173.7(5) |
| C(18A)-C(23A)-C(24A)-N(5A)  | 8.1(5)    |
| B(1A)-O(1A)-C(25A)-C(26A)   | 23.5(7)   |
| B(1A)-O(1A)-C(25A)-C(30A)   | -157.6(4) |
| O(1A)-C(25A)-C(26A)-C(27A)  | 179.6(4)  |
| C(30A)-C(25A)-C(26A)-C(27A) | 0.9(7)    |
| C(25A)-C(26A)-C(27A)-C(28A) | 1.2(8)    |
| C(25A)-C(26A)-C(27A)-I(1A)  | -178.7(4) |
| C(26A)-C(27A)-C(28A)-C(29A) | -2.7(8)   |
| I(1A)-C(27A)-C(28A)-C(29A)  | 177.2(4)  |
| C(27A)-C(28A)-C(29A)-C(30A) | 2.1(9)    |
| C(28A)-C(29A)-C(30A)-C(25A) | -0.1(8)   |
| O(1A)-C(25A)-C(30A)-C(29A)  | 179.7(5)  |
| C(26A)-C(25A)-C(30A)-C(29A) | -1.4(7)   |
| C(25A)-O(1A)-B(1A)-N(1A)    | -173.8(4) |
| C(25A)-O(1A)-B(1A)-N(3A)    | 69.7(6)   |
| C(25A)-O(1A)-B(1A)-N(5A)    | -57.8(7)  |
| C(8A)-N(1A)-B(1A)-O(1A)     | -94.8(5)  |
| C(1A)-N(1A)-B(1A)-O(1A)     | 91.8(5)   |
| C(8A)-N(1A)-B(1A)-N(3A)     | 31.1(6)   |
| C(1A)-N(1A)-B(1A)-N(3A)     | -142.2(4) |
| C(8A)-N(1A)-B(1A)-N(5A)     | 138.2(4)  |
| C(1A)-N(1A)-B(1A)-N(5A)     | -35.1(6)  |
| C(9A)-N(3A)-B(1A)-O(1A)     | 89.3(6)   |
| C(16A)-N(3A)-B(1A)-O(1A)    | -108.5(5) |
| C(9A)-N(3A)-B(1A)-N(1A)     | -29.9(6)  |
| C(16A)-N(3A)-B(1A)-N(1A)    | 132.3(4)  |
| C(9A)-N(3A)-B(1A)-N(5A)     | -135.9(4) |
| C(16A)-N(3A)-B(1A)-N(5A)    | 26.3(6)   |
| C(17A)-N(5A)-B(1A)-O(1A)    | 107.5(5)  |
| C(24A)-N(5A)-B(1A)-O(1A)    | -83.5(6)  |
| C(17A)-N(5A)-B(1A)-N(1A)    | -133.4(4) |
| C(24A)-N(5A)-B(1A)-N(1A)    | 35.6(6)   |
| C(17A)-N(5A)-B(1A)-N(3A)    | -26.5(6)  |

|                           |           |
|---------------------------|-----------|
| C(24A)-N(5A)-B(1A)-N(3A)  | 142.5(4)  |
| C(24B)-N(6B)-C(1B)-N(1B)  | 7.3(7)    |
| C(24B)-N(6B)-C(1B)-C(2B)  | -156.1(5) |
| C(8B)-N(1B)-C(1B)-N(6B)   | -154.1(4) |
| B(1B)-N(1B)-C(1B)-N(6B)   | 16.9(7)   |
| C(8B)-N(1B)-C(1B)-C(2B)   | 12.8(5)   |
| B(1B)-N(1B)-C(1B)-C(2B)   | -176.2(4) |
| N(6B)-C(1B)-C(2B)-C(3B)   | -18.7(9)  |
| N(1B)-C(1B)-C(2B)-C(3B)   | 175.8(5)  |
| N(6B)-C(1B)-C(2B)-C(7B)   | 157.7(5)  |
| N(1B)-C(1B)-C(2B)-C(7B)   | -7.9(5)   |
| C(7B)-C(2B)-C(3B)-C(4B)   | 1.3(7)    |
| C(1B)-C(2B)-C(3B)-C(4B)   | 177.3(5)  |
| C(2B)-C(3B)-C(4B)-C(5B)   | -1.7(7)   |
| C(2B)-C(3B)-C(4B)-Cl(1B)  | -179.0(4) |
| C(3B)-C(4B)-C(5B)-C(6B)   | -0.2(8)   |
| Cl(1B)-C(4B)-C(5B)-C(6B)  | 177.1(4)  |
| C(3B)-C(4B)-C(5B)-Cl(2B)  | 178.4(4)  |
| Cl(1B)-C(4B)-C(5B)-Cl(2B) | -4.3(6)   |
| C(4B)-C(5B)-C(6B)-C(7B)   | 2.5(8)    |
| Cl(2B)-C(5B)-C(6B)-C(7B)  | -176.1(4) |
| C(5B)-C(6B)-C(7B)-C(2B)   | -2.8(7)   |
| C(5B)-C(6B)-C(7B)-C(8B)   | -178.3(5) |
| C(3B)-C(2B)-C(7B)-C(6B)   | 0.9(7)    |
| C(1B)-C(2B)-C(7B)-C(6B)   | -175.9(5) |
| C(3B)-C(2B)-C(7B)-C(8B)   | 177.3(4)  |
| C(1B)-C(2B)-C(7B)-C(8B)   | 0.5(5)    |
| C(9B)-N(2B)-C(8B)-N(1B)   | -10.0(7)  |
| C(9B)-N(2B)-C(8B)-C(7B)   | 158.4(5)  |
| C(1B)-N(1B)-C(8B)-N(2B)   | 158.7(4)  |
| B(1B)-N(1B)-C(8B)-N(2B)   | -12.1(7)  |
| C(1B)-N(1B)-C(8B)-C(7B)   | -12.6(5)  |
| B(1B)-N(1B)-C(8B)-C(7B)   | 176.5(4)  |
| C(6B)-C(7B)-C(8B)-N(2B)   | 13.2(9)   |
| C(2B)-C(7B)-C(8B)-N(2B)   | -162.7(5) |
| C(6B)-C(7B)-C(8B)-N(1B)   | -177.2(5) |

|                             |           |
|-----------------------------|-----------|
| C(2B)-C(7B)-C(8B)-N(1B)     | 6.9(5)    |
| C(8B)-N(2B)-C(9B)-N(3B)     | 9.9(7)    |
| C(8B)-N(2B)-C(9B)-C(10B)    | -153.5(5) |
| C(16B)-N(3B)-C(9B)-N(2B)    | -153.0(4) |
| B(1B)-N(3B)-C(9B)-N(2B)     | 12.5(7)   |
| C(16B)-N(3B)-C(9B)-C(10B)   | 13.6(5)   |
| B(1B)-N(3B)-C(9B)-C(10B)    | 179.2(4)  |
| N(2B)-C(9B)-C(10B)-C(11B)   | -14.5(9)  |
| N(3B)-C(9B)-C(10B)-C(11B)   | 180.0(5)  |
| N(2B)-C(9B)-C(10B)-C(15B)   | 157.2(5)  |
| N(3B)-C(9B)-C(10B)-C(15B)   | -8.3(5)   |
| C(9B)-C(10B)-C(11B)-C(12B)  | 171.1(5)  |
| C(15B)-C(10B)-C(11B)-C(12B) | 0.2(7)    |
| C(10B)-C(11B)-C(12B)-C(13B) | -0.5(7)   |
| C(10B)-C(11B)-C(12B)-Cl(3B) | -179.7(4) |
| C(11B)-C(12B)-C(13B)-C(14B) | 0.6(8)    |
| Cl(3B)-C(12B)-C(13B)-C(14B) | 179.8(4)  |
| C(11B)-C(12B)-C(13B)-Cl(4B) | -178.3(4) |
| Cl(3B)-C(12B)-C(13B)-Cl(4B) | 0.8(6)    |
| C(12B)-C(13B)-C(14B)-C(15B) | -0.3(7)   |
| Cl(4B)-C(13B)-C(14B)-C(15B) | 178.6(4)  |
| C(13B)-C(14B)-C(15B)-C(10B) | 0.0(7)    |
| C(13B)-C(14B)-C(15B)-C(16B) | -172.0(5) |
| C(11B)-C(10B)-C(15B)-C(14B) | 0.1(7)    |
| C(9B)-C(10B)-C(15B)-C(14B)  | -173.0(4) |
| C(11B)-C(10B)-C(15B)-C(16B) | 173.8(4)  |
| C(9B)-C(10B)-C(15B)-C(16B)  | 0.8(5)    |
| C(17B)-N(4B)-C(16B)-N(3B)   | -6.5(7)   |
| C(17B)-N(4B)-C(16B)-C(15B)  | 154.2(5)  |
| C(9B)-N(3B)-C(16B)-N(4B)    | 151.7(4)  |
| B(1B)-N(3B)-C(16B)-N(4B)    | -13.8(7)  |
| C(9B)-N(3B)-C(16B)-C(15B)   | -13.0(5)  |
| B(1B)-N(3B)-C(16B)-C(15B)   | -178.5(4) |
| C(14B)-C(15B)-C(16B)-N(4B)  | 16.6(9)   |
| C(10B)-C(15B)-C(16B)-N(4B)  | -156.3(5) |
| C(14B)-C(15B)-C(16B)-N(3B)  | 179.9(5)  |

|                             |           |
|-----------------------------|-----------|
| C(10B)-C(15B)-C(16B)-N(3B)  | 7.0(5)    |
| C(16B)-N(4B)-C(17B)-N(5B)   | 7.4(7)    |
| C(16B)-N(4B)-C(17B)-C(18B)  | -155.9(5) |
| C(24B)-N(5B)-C(17B)-N(4B)   | -154.8(5) |
| B(1B)-N(5B)-C(17B)-N(4B)    | 12.1(7)   |
| C(24B)-N(5B)-C(17B)-C(18B)  | 12.0(5)   |
| B(1B)-N(5B)-C(17B)-C(18B)   | 178.8(4)  |
| N(4B)-C(17B)-C(18B)-C(19B)  | -17.9(9)  |
| N(5B)-C(17B)-C(18B)-C(19B)  | 176.7(5)  |
| N(4B)-C(17B)-C(18B)-C(23B)  | 160.2(5)  |
| N(5B)-C(17B)-C(18B)-C(23B)  | -5.2(5)   |
| C(23B)-C(18B)-C(19B)-C(20B) | 2.7(7)    |
| C(17B)-C(18B)-C(19B)-C(20B) | -179.4(5) |
| C(18B)-C(19B)-C(20B)-C(21B) | -0.5(7)   |
| C(18B)-C(19B)-C(20B)-Cl(5B) | -179.4(4) |
| C(19B)-C(20B)-C(21B)-C(22B) | -2.3(8)   |
| Cl(5B)-C(20B)-C(21B)-C(22B) | 176.7(4)  |
| C(19B)-C(20B)-C(21B)-Cl(6B) | 177.1(4)  |
| Cl(5B)-C(20B)-C(21B)-Cl(6B) | -4.0(6)   |
| C(20B)-C(21B)-C(22B)-C(23B) | 2.6(7)    |
| Cl(6B)-C(21B)-C(22B)-C(23B) | -176.8(3) |
| C(21B)-C(22B)-C(23B)-C(18B) | -0.3(7)   |
| C(21B)-C(22B)-C(23B)-C(24B) | -177.8(5) |
| C(19B)-C(18B)-C(23B)-C(22B) | -2.3(7)   |
| C(17B)-C(18B)-C(23B)-C(22B) | 179.3(4)  |
| C(19B)-C(18B)-C(23B)-C(24B) | 175.7(4)  |
| C(17B)-C(18B)-C(23B)-C(24B) | -2.7(5)   |
| C(1B)-N(6B)-C(24B)-N(5B)    | -9.6(7)   |
| C(1B)-N(6B)-C(24B)-C(23B)   | 155.9(5)  |
| C(17B)-N(5B)-C(24B)-N(6B)   | 154.7(4)  |
| B(1B)-N(5B)-C(24B)-N(6B)    | -12.2(7)  |
| C(17B)-N(5B)-C(24B)-C(23B)  | -13.7(5)  |
| B(1B)-N(5B)-C(24B)-C(23B)   | 179.4(4)  |
| C(22B)-C(23B)-C(24B)-N(6B)  | 19.9(9)   |
| C(18B)-C(23B)-C(24B)-N(6B)  | -157.8(5) |
| C(22B)-C(23B)-C(24B)-N(5B)  | -172.6(5) |

|                             |           |
|-----------------------------|-----------|
| C(18B)-C(23B)-C(24B)-N(5B)  | 9.6(5)    |
| B(1B)-O(1B)-C(25B)-C(30B)   | -154.2(5) |
| B(1B)-O(1B)-C(25B)-C(26B)   | 30.7(8)   |
| O(1B)-C(25B)-C(26B)-C(27B)  | 176.9(4)  |
| C(30B)-C(25B)-C(26B)-C(27B) | 2.0(8)    |
| C(25B)-C(26B)-C(27B)-C(28B) | -0.2(8)   |
| C(25B)-C(26B)-C(27B)-I(1B)  | -176.4(4) |
| C(26B)-C(27B)-C(28B)-C(29B) | -2.0(8)   |
| I(1B)-C(27B)-C(28B)-C(29B)  | 174.3(4)  |
| C(27B)-C(28B)-C(29B)-C(30B) | 2.4(9)    |
| O(1B)-C(25B)-C(30B)-C(29B)  | -176.9(5) |
| C(26B)-C(25B)-C(30B)-C(29B) | -1.6(8)   |
| C(28B)-C(29B)-C(30B)-C(25B) | -0.6(9)   |
| C(25B)-O(1B)-B(1B)-N(5B)    | -69.7(7)  |
| C(25B)-O(1B)-B(1B)-N(1B)    | 173.3(4)  |
| C(25B)-O(1B)-B(1B)-N(3B)    | 57.0(7)   |
| C(24B)-N(5B)-B(1B)-O(1B)    | -89.2(6)  |
| C(17B)-N(5B)-B(1B)-O(1B)    | 105.3(5)  |
| C(24B)-N(5B)-B(1B)-N(1B)    | 30.4(6)   |
| C(17B)-N(5B)-B(1B)-N(1B)    | -135.1(4) |
| C(24B)-N(5B)-B(1B)-N(3B)    | 138.4(4)  |
| C(17B)-N(5B)-B(1B)-N(3B)    | -27.1(6)  |
| C(1B)-N(1B)-B(1B)-O(1B)     | 94.7(5)   |
| C(8B)-N(1B)-B(1B)-O(1B)     | -95.4(5)  |
| C(1B)-N(1B)-B(1B)-N(5B)     | -32.8(6)  |
| C(8B)-N(1B)-B(1B)-N(5B)     | 137.2(4)  |
| C(1B)-N(1B)-B(1B)-N(3B)     | -140.9(4) |
| C(8B)-N(1B)-B(1B)-N(3B)     | 29.1(6)   |
| C(9B)-N(3B)-B(1B)-O(1B)     | 89.7(5)   |
| C(16B)-N(3B)-B(1B)-O(1B)    | -106.2(5) |
| C(9B)-N(3B)-B(1B)-N(5B)     | -136.2(4) |
| C(16B)-N(3B)-B(1B)-N(5B)    | 27.9(6)   |
| C(9B)-N(3B)-B(1B)-N(1B)     | -28.9(6)  |
| C(16B)-N(3B)-B(1B)-N(1B)    | 135.2(4)  |

---

Symmetry transformations used to generate equivalent atoms:
